# Supplementary material for: Functional redundancy in Candida auris cell surface adhesins crucial for cell-cell interaction and aggregation
Source: Springer Nature journal article supplement (doi:10.1038/s41467-024-53588-5), 2024-10-25
Supplement: MOESM3 [file 41467_2024_53588_MOESM3_ESM.xlsx]

## Sheet: supp1_annot
Supplementary Table 1. Differentially expressed host genes between AR0382/ AR0387 during in vitro biofilm growth (FDR <0.01, LFC >= |1.0|)
Values represent log (base 2) fold change of AR0382/ AR0387.
Gene_ID	LFC (AR0382_in vitro/AR0387 in vitro)	FDR	Gene_name	Description
B9J08_001458	8.61155	4.78e-29	SCF1	Ortholog of Candida lusitaniae ATCC 42720 : CLUG_05295
B9J08_004451	6.8096	7.97e-37		Protein of unknown function
B9J08_000592	5.99198	5.93e-25		Has domain(s) with predicted DNA-binding transcription factor activity, RNA polymerase II-specific, zinc ion binding activity and role in regulation of DNA-templated transcription
B9J08_001515	5.16395	5.69e-28		Has domain(s) with predicted heme binding, iron ion binding, monooxygenase activity, oxidoreductase activity, acting on paired donors and with incorporation or reduction of molecular oxygen, more
B9J08_004112	5.06925	3.81e-24	ALS4112	Putative cell-surface adhesin; increases in expression in response to caspofungin; associated with autoaggregation that may contribute to stress adaption
B9J08_004100	4.96597	2.5e-19		Protein of unknown function
B9J08_005072	4.73392	1.92e-16		Ortholog of C. albicans SC5314 : C2_08260W_A, C. dubliniensis CD36 : Cd36_22390, C. parapsilosis CDC317 : CPAR2_805760 and Candida tenuis NRRL Y-1498 : CANTEDRAFT_104120
B9J08_001581	4.33666	1.31e-17		Has domain(s) with predicted ATP binding, ATPase, nucleotide binding, transporter activity and membrane localization
B9J08_003891	4.0008	2.38e-05		Protein of unknown function
B9J08_001899	3.8909	7.92e-10		Has domain(s) with predicted ABC-type transporter activity, ATP binding, ATPase activity, role in transmembrane transport and membrane localization
B9J08_001155	3.88617	6.51e-12		Protein of unknown function
B9J08_004109	3.62476	1.86e-10		Ortholog of Candida lusitaniae ATCC 42720 : CLUG_05599
B9J08_004446	3.55279	1.34e-10		Has domain(s) with predicted ATP binding, ATPase activity
B9J08_002630	3.37475	1e-07		Ortholog(s) have ammonium transmembrane transporter activity and role in ammonium transmembrane transport, nitrogen utilization
B9J08_004545	3.32557	6.49e-05		Has domain(s) with predicted oligopeptide transmembrane transporter activity and role in transmembrane transport
B9J08_004602	3.25102	3.15e-10		Ortholog(s) have oligopeptide transmembrane transporter activity, proton-dependent oligopeptide secondary active transmembrane transporter activity, tetrapeptide transmembrane transporter activity
B9J08_003657	3.08273	2.16e-08		Ortholog(s) have high-affinity zinc transmembrane transporter activity, low-affinity zinc ion transmembrane transporter activity, role in zinc ion import across plasma membrane and plasma membrane localization
B9J08_002333	3.06282	3.82e-06		Protein of unknown function
B9J08_004098	3.04108	4.62e-08		Protein of unknown function
B9J08_002660	3.04069	1.63e-10		Has domain(s) with predicted transmembrane transporter activity, role in transmembrane transport and membrane localization
B9J08_004544	2.97825	8.34e-08		Has domain(s) with predicted oligopeptide transmembrane transporter activity and role in transmembrane transport
B9J08_004204	2.97301	1e-07		Has domain(s) with predicted transmembrane transporter activity, role in transmembrane transport and membrane localization
B9J08_004066	2.85442	5.92e-09		Ortholog(s) have glutathione transmembrane transporter activity, role in glutathione import across plasma membrane, glutathione transmembrane transport and plasma membrane, plasma membrane of cell tip localization
B9J08_000117	2.75862	0.00837364		Ortholog of C. albicans SC5314 : C4_04080C_A/PGA31, C. dubliniensis CD36 : Cd36_43780, Candida tenuis NRRL Y-1498 : CANTEDRAFT_115824 and Pichia stipitis Pignal : PICST_43383
B9J08_004161	2.57044	0.00622031	ERG5	Has domain(s) with predicted heme binding, iron ion binding, monooxygenase activity, oxidoreductase activity, acting on paired donors and with incorporation or reduction of molecular oxygen, more
B9J08_001362	2.52252	2.13e-08		Ortholog(s) have L-leucine transmembrane transporter activity, amino acid transmembrane transporter activity and role in amino acid transport, leucine import across plasma membrane, transmembrane transport
B9J08_001660	2.51355	1.58e-06		Has domain(s) with predicted copper ion binding, primary amine oxidase activity, quinone binding activity and role in amine metabolic process
B9J08_002256	2.49623	3.7e-06		Protein of unknown function
B9J08_000005	2.45768	0.000207787		Protein of unknown function
B9J08_004842	2.41391	0.00768436		Ortholog of Candida lusitaniae ATCC 42720 : CLUG_02350
B9J08_000008	2.30491	0.000515597		Has domain(s) with predicted oxidoreductase activity
B9J08_002886	2.29818	6.56e-07		Ortholog(s) have role in intracellular phosphate ion homeostasis
B9J08_000724	2.25882	1.02e-06		Ortholog of C. albicans SC5314 : C1_10060C_A, C. dubliniensis CD36 : Cd36_09460, C. parapsilosis CDC317 : CPAR2_700850 and Candida tenuis NRRL Y-1498 : CANTEDRAFT_114857
B9J08_004479	2.23614	1.86e-05		Has domain(s) with predicted oligopeptide transmembrane transporter activity and role in transmembrane transport
B9J08_001673	2.14248	1.06e-05		Has domain(s) with predicted role in amino acid transport, transmembrane transport and membrane localization
B9J08_000398	2.12109	0.000216448	SAP7	Putative aspartic-type endopeptidase; appears to play a minor role, if any; null mutant shows normal secretion of aspartyl protease and normal formation of biofilms and hyphae
B9J08_002227	2.08924	1.15e-05		Has domain(s) with predicted transmembrane transporter activity, role in transmembrane transport and membrane localization
B9J08_000266	1.91448	0.00096668		Protein of unknown function
B9J08_003694	1.89261	0.000599977		Ortholog of C. albicans SC5314 : C1_05520W_A, C. dubliniensis CD36 : Cd36_05240, C. parapsilosis CDC317 : CPAR2_107620 and Candida tenuis NRRL Y-1498 : CANTEDRAFT_133479
B9J08_002251	1.87877	0.00773816		Has domain(s) with predicted transmembrane transporter activity, role in transmembrane transport and membrane localization
B9J08_004135	1.85864	0.000178405		Has domain(s) with predicted role in regulation of DNA-templated transcription
B9J08_001132	1.74235	0.00837364		Ortholog(s) have role in nonfunctional rRNA decay and cytoplasm localization
B9J08_004514	1.67901	0.00837364		Ortholog of C. albicans SC5314 : CR_09190C_A, C. dubliniensis CD36 : Cd36_34570, C. parapsilosis CDC317 : CPAR2_701240 and Candida tenuis NRRL Y-1498 : CANTEDRAFT_115405
B9J08_003910	1.62941	0.0017549		Has domain(s) with predicted structural constituent of cell wall activity and cell wall localization
B9J08_000594	1.62302	0.00370398		Has domain(s) with predicted phosphatidylinositol binding activity
B9J08_002055	1.54923	0.00622031		Protein of unknown function
B9J08_003563	1.49772	0.00773816		Has domain(s) with predicted oxidoreductase activity, zinc ion binding activity
B9J08_004097	-1.42173	0.00771689		Has domain(s) with predicted transmembrane transporter activity and role in transmembrane transport
B9J08_004775	-1.55091	0.00773816	TPO3	Putative polyamine transporter of the MFS-MDR family; expression increases ~12-fold in strains with evolved resistance to fluconazole and voriconazole
B9J08_001952	-1.6405	0.00837364		Has domain(s) with predicted transmembrane transporter activity, role in transmembrane transport and membrane localization
B9J08_004798	-1.64235	0.00264431		Ortholog(s) have ornithine carbamoyltransferase activity, role in arginine biosynthetic process, arginine biosynthetic process via ornithine and cytosol, mitochondrion localization
B9J08_003449	-1.69102	0.00676136		Ortholog(s) have glycerol-3-phosphate dehydrogenase [NAD(P)+] activity and role in NADH oxidation, glycerol biosynthetic process, intracellular accumulation of glycerol, protein import into peroxisome matrix
B9J08_000170	-1.74827	0.000769219		Ortholog(s) have role in endocytosis, iron ion transmembrane transport and fungal-type vacuole membrane, membrane raft localization
B9J08_002217	-1.82801	0.000261819		Has domain(s) with predicted DNA binding, DNA-binding transcription factor activity, RNA polymerase II-specific, zinc ion binding activity and role in DNA-templated transcription, regulation of DNA-templated transcription
B9J08_002951	-1.87228	7.21e-05		Has domain(s) with predicted membrane localization
B9J08_002218	-1.89958	0.000270168		Protein of unknown function
B9J08_004830	-2.02919	0.00201775		Ortholog(s) have endoplasmic reticulum localization
B9J08_005317	-2.11639	0.00695636		Ortholog(s) have RNA polymerase II-specific DNA-binding transcription factor binding activity and role in negative regulation of transcription by RNA polymerase II, positive regulation of transcription by RNA polymerase II
B9J08_004444	-2.12286	4.34e-06		Ortholog of C. albicans SC5314 : C3_04840C_A, C. dubliniensis CD36 : Cd36_84810, C. parapsilosis CDC317 : CPAR2_807390 and Candida tenuis NRRL Y-1498 : CANTEDRAFT_116531
B9J08_000834	-2.18314	0.000165461		Ortholog of C. albicans SC5314 : C7_00350C_A, C. dubliniensis CD36 : Cd36_70560, C. parapsilosis CDC317 : CPAR2_301610 and Candida tenuis NRRL Y-1498 : cten_CGOB_00180
B9J08_001948	-2.18625	0.00148347		Protein of unknown function
B9J08_003491	-2.32205	1.3e-06		Protein of unknown function
B9J08_001520	-2.39522	3.84e-07		Protein of unknown function
B9J08_000221	-2.42453	9.62e-06		Protein of unknown function
B9J08_003903	-2.46071	9.53e-08		Ortholog(s) have fungal-type cell wall localization
B9J08_004365	-2.51849	4.37e-06		Ortholog(s) have succinate:fumarate antiporter activity and role in fumarate transport, succinate transport
B9J08_000438	-2.53077	5.55e-08		Protein of unknown function
B9J08_004200	-2.63344	6.44e-09		Ortholog(s) have structural constituent of cell wall activity, role in ascospore-type prospore membrane formation, fungal-type cell wall organization and cellular birth scar, fungal-type cell wall, prospore membrane localization
B9J08_002244	-3.03246	1.44e-10		Protein of unknown function
B9J08_005560	-3.07745	5.54e-12		Protein of unknown function
B9J08_003908	-3.44157	2.1e-13		Has domain(s) with predicted transmembrane transporter activity and role in transmembrane transport
B9J08_003981	-4.03431	9.44e-17	MDR1	Putative efflux transporter of the major facilitator superfamily; expression is increased in some fluconazole-resistant isolates
B9J08_000656	-4.26796	4.56e-21	MGD1	Putative methylglyoxal reductase; expression appears to be induced by the transcription factor Mrr1p in response to methylglyoxal and benomyl
B9J08_002480	-5.26608	1.86e-28		Has domain(s) with predicted transmembrane transporter activity, role in transmembrane transport and membrane localization
B9J08_001549	-6.12468	8.9e-15		Putative glycosylphosphatidylinositol-anchored protein; unique to C. auris and useful for strain typing; contains an N-terminal signal peptide for secretion and a C-terminal glycosylphosphatidylinositol
B9J08_002136	-10	1.1e-77		Has domain(s) with predicted DNA-binding transcription factor activity, RNA polymerase II-specific, zinc ion binding activity and role in regulation of DNA-templated transcription
