# Supplementary material for: Functional redundancy in Candida auris cell surface adhesins crucial for cell-cell interaction and aggregation
Source: Springer Nature journal article supplement (doi:10.1038/s41467-024-53588-5), 2024-10-25
Supplement: MOESM4 [file 41467_2024_53588_MOESM4_ESM.xlsx]

## Sheet: supp2_annot
Supplementary Table 2. Differentially expressed host genes between AR0382/ AR0387 during in vivo biofilm growth (FDR <0.01, LFC >= |1.0|)
Values represent log (base 2) fold change of AR0382/ AR0387.
Gene_ID	LFC (AR0382 in vivo/AR0387 in vivo)	FDR	Gene_name	Description
B9J08_003891	4.95127	2.32e-26		Protein of unknown function
B9J08_001458	4.46607	7.1e-26	SCF1	Ortholog of Candida lusitaniae ATCC 42720 : CLUG_05295
B9J08_004100	3.6763	1.35e-49		Protein of unknown function
B9J08_004109	3.13969	3.36e-61		Ortholog of Candida lusitaniae ATCC 42720 : CLUG_05599
B9J08_004544	2.97629	9.51e-18		Has domain(s) with predicted oligopeptide transmembrane transporter activity and role in transmembrane transport
B9J08_000846	2.86548	0.00932734		Ortholog of C. albicans SC5314 : CR_08830W_A, C. dubliniensis CD36 : Cd36_26620, C. parapsilosis CDC317 : CPAR2_201160 and Candida tenuis NRRL Y-1498 : CANTEDRAFT_115461
B9J08_004451	2.85921	0.00024047		Protein of unknown function
B9J08_004112	2.55754	1.84e-06	ALS4112	Putative cell-surface adhesin; increases in expression in response to caspofungin; associated with autoaggregation that may contribute to stress adaption
B9J08_002459	2.54801	0.000805119		Ortholog(s) have lipid binding activity, role in endocytosis, response to heat and eisosome localization
B9J08_000595	2.49307	6.89e-18		Ortholog of C. albicans SC5314 : C1_06350W_A, C. dubliniensis CD36 : Cd36_05930, C. parapsilosis CDC317 : CPAR2_803870 and Candida tenuis NRRL Y-1498 : CANTEDRAFT_112418
B9J08_001899	2.48284	7.46e-38		Has domain(s) with predicted ABC-type transporter activity, ATP binding, ATPase activity, role in transmembrane transport and membrane localization
B9J08_000724	2.45569	7.23e-08		Ortholog of C. albicans SC5314 : C1_10060C_A, C. dubliniensis CD36 : Cd36_09460, C. parapsilosis CDC317 : CPAR2_700850 and Candida tenuis NRRL Y-1498 : CANTEDRAFT_114857
B9J08_001362	2.45152	2.84e-08		Ortholog(s) have L-leucine transmembrane transporter activity, amino acid transmembrane transporter activity and role in amino acid transport, leucine import across plasma membrane, transmembrane transport
B9J08_002381	2.4283	6.53e-05		Ortholog(s) have phosphatidyl-N-dimethylethanolamine N-methyltransferase activity, phosphatidyl-N-methylethanolamine N-methyltransferase activity and role in phosphatidylcholine biosynthetic process
B9J08_004987	2.32189	9.74e-05		Ortholog of C. albicans SC5314 : C1_01510W_B, C. dubliniensis CD36 : Cd36_01380, C. parapsilosis CDC317 : CPAR2_109270 and Candida tenuis NRRL Y-1498 : CANTEDRAFT_93810
B9J08_001621	2.26987	5.3e-05		Protein of unknown function
B9J08_004446	2.26333	8.84e-14		Has domain(s) with predicted ATP binding, ATPase activity
B9J08_004176	2.23264	0.000364348		Has domain(s) with predicted triglyceride lipase activity and role in lipid catabolic process
B9J08_001861	2.22866	0.000251199		Ortholog(s) have long-chain fatty acid transporter activity, very long-chain fatty acid-CoA ligase activity
B9J08_000211	2.17734	0.000157798		Protein of unknown function
B9J08_002830	2.16389	1.84e-06		Has domain(s) with predicted oxidoreductase activity
B9J08_004560	2.1423	0.000934143		Has domain(s) with predicted oligopeptide transmembrane transporter activity and role in transmembrane transport
B9J08_002847	2.13526	0.000637484		Ortholog(s) have 3-hydroxyacyl-CoA dehydrogenase activity, enoyl-CoA hydratase activity, role in fatty acid beta-oxidation and peroxisome localization
B9J08_001484	2.10889	0.000415757		Ortholog(s) have acetyl-CoA C-acyltransferase activity, mRNA binding activity, role in fatty acid beta-oxidation and mitochondrial intermembrane space, peroxisomal matrix, peroxisome localization
B9J08_002919	2.08242	1.65e-08		Ortholog(s) have malate synthase activity, role in glyoxylate cycle and cytosol, peroxisomal matrix, peroxisome localization
B9J08_002940	2.08232	4.63e-06		Ortholog(s) have role in negative regulation of conjugation with cellular fusion, negative regulation of transcription by RNA polymerase II
B9J08_000178	2.053	0.000180945		Ortholog of C. albicans SC5314 : C3_01420C_A, C. dubliniensis CD36 : Cd36_81350, C. parapsilosis CDC317 : CPAR2_503800 and Candida tenuis NRRL Y-1498 : CANTEDRAFT_114361
B9J08_001581	2.05087	1.88e-11		Has domain(s) with predicted ATP binding, ATPase, nucleotide binding, transporter activity and membrane localization
B9J08_003628	2.04287	0.00139686		Has domain(s) with predicted FAD binding, acyl-CoA oxidase activity, flavin adenine dinucleotide binding, oxidoreductase activity, acting on the CH-CH group of donors activity
B9J08_000987	2.04273	0.000315535		Has domain(s) with predicted membrane, plasma membrane localization
B9J08_004559	2.03997	1.42e-06		Has domain(s) with predicted oxidoreductase activity and mitochondrion localization
B9J08_002012	2.02947	0.000299444		Ortholog of C. albicans SC5314 : C1_01220C_A, C. dubliniensis CD36 : Cd36_01140, Candida tenuis NRRL Y-1498 : CANTEDRAFT_114214 and Debaryomyces hansenii CBS767 : DEHA2D14784g
B9J08_004628	2.00523	9.83e-05		Ortholog(s) have double-stranded DNA binding, single-stranded DNA endodeoxyribonuclease activity
B9J08_001552	1.98591	0.00931954		Protein of unknown function
B9J08_004365	1.91535	0.000148015		Ortholog(s) have succinate:fumarate antiporter activity and role in fumarate transport, succinate transport
B9J08_002668	1.90194	0.000319323		Has domain(s) with predicted heme binding, iron ion binding, monooxygenase activity, oxidoreductase activity, acting on paired donors and with incorporation or reduction of molecular oxygen, more
B9J08_002261	1.88529	0.00128845		Ortholog(s) have role in eisosome assembly, negative regulation of protein phosphorylation, plasma membrane organization, protein localization to plasma membrane and protein secretion, more
B9J08_005380	1.86726	4.15e-05		Ortholog(s) have role in ascospore formation, endocytosis, protein localization to eisosome filament and cell cortex, eisosome, plasma membrane localization
B9J08_002166	1.86498	1.07e-06		Ortholog of S. cerevisiae : YNL115C, C. albicans SC5314 : C6_00250W_A, C. glabrata CBS138 : CAGL0L03938g, C. dubliniensis CD36 : Cd36_60200 and C. parapsilosis CDC317 : CPAR2_603320
B9J08_000388	1.85563	1.32e-07		Ortholog(s) have DNA-binding transcription factor activity, role in meiotic cell cycle, positive regulation of transcription by RNA polymerase II and nuclear chromosome localization
B9J08_004148	1.83859	0.000449841		Ortholog of C. albicans SC5314 : C1_13080W_A/OP4, C. dubliniensis CD36 : Cd36_12150, C. parapsilosis CDC317 : CPAR2_801850 and Candida tenuis NRRL Y-1498 : cten_CGOB_00178
B9J08_002239	1.83719	9.46e-11		Has domain(s) with predicted transmembrane transporter activity, role in transmembrane transport and membrane localization
B9J08_004477	1.83315	1.25e-08		Has domain(s) with predicted hydrolase activity, hydrolyzing O-glycosyl compounds activity and role in organic substance metabolic process
B9J08_004905	1.82647	0.00106408		Ortholog(s) have delta(3)-delta(2)-enoyl-CoA isomerase activity, role in fatty acid beta-oxidation and peroxisome localization
B9J08_004324	1.80722	1.4e-11		Has domain(s) with predicted role in transmembrane transport and membrane localization
B9J08_002825	1.8049	1.21e-10		Ortholog of Candida tenuis NRRL Y-1498 : CANTEDRAFT_115096
B9J08_004167	1.80329	0.0036903		Ortholog(s) have DNA-binding transcription activator activity, RNA polymerase II-specific, RNA polymerase II cis-regulatory region sequence-specific DNA binding activity
B9J08_004840	1.79789	0.00211365		Ortholog(s) have cytoplasm, eisosome localization
B9J08_000592	1.79647	0.000319323		Has domain(s) with predicted DNA-binding transcription factor activity, RNA polymerase II-specific, zinc ion binding activity and role in regulation of DNA-templated transcription
B9J08_003109	1.78451	1.32e-08		Ortholog of C. albicans SC5314 : C5_03430W_A, C. dubliniensis CD36 : Cd36_53200, C. parapsilosis CDC317 : CPAR2_502060 and Candida tenuis NRRL Y-1498 : CANTEDRAFT_115234
B9J08_005394	1.77922	0.000319119		Ortholog of Candida tenuis NRRL Y-1498 : CANTEDRAFT_115648, Debaryomyces hansenii CBS767 : DEHA2E18194g, Pichia stipitis Pignal : PICST_37102 and Candida guilliermondii ATCC 6260 : PGUG_01260
B9J08_000581	1.77512	9.82e-05		Has domain(s) with predicted flavin adenine dinucleotide binding, long-chain-alcohol oxidase activity, oxidoreductase activity, acting on CH-OH group of donors activity
B9J08_000849	1.7648	2.03e-08		Ortholog of C. albicans SC5314 : CR_08890C_A/ASR2, C. parapsilosis CDC317 : CPAR2_201370, Candida tenuis NRRL Y-1498 : CANTEDRAFT_99098 and Debaryomyces hansenii CBS767 : DEHA2C13398g
B9J08_002624	1.76338	0.000336098		Protein of unknown function
B9J08_003514	1.73567	3.49e-08		Ortholog(s) have O-acetylhomoserine aminocarboxypropyltransferase activity, cysteine synthase activity and role in L-homocysteine biosynthetic process, cysteine biosynthetic process from serine, methionine metabolic process
B9J08_001956	1.73221	0.0044792		Ortholog(s) have 2,4-dienoyl-CoA reductase (NADPH) activity, role in ascospore formation, fatty acid catabolic process and peroxisomal matrix localization
B9J08_000594	1.72207	2.06e-06		Has domain(s) with predicted phosphatidylinositol binding activity
B9J08_000398	1.7175	1.28e-06	SAP7	Putative aspartic-type endopeptidase; appears to play a minor role, if any; null mutant shows normal secretion of aspartyl protease and normal formation of biofilms and hyphae
B9J08_001551	1.70879	0.00894113		Protein of unknown function
B9J08_001613	1.70778	0.00300238		Has domain(s) with predicted hydrolase activity, nucleotidase activity
B9J08_000007	1.69186	0.00102714		Ortholog of Candida lusitaniae ATCC 42720 : CLUG_01211
B9J08_001538	1.68383	0.000164436		Protein of unknown function
B9J08_001323	1.67946	0.000239545		Ortholog(s) have SNAP receptor activity and role in Golgi to vacuole transport, intra-Golgi vesicle-mediated transport, macroautophagy, vacuole fusion, non-autophagic, vesicle fusion
B9J08_002707	1.67784	9.59e-05		Ortholog(s) have sterol 3-beta-glucosyltransferase activity and role in ascospore-type prospore membrane formation, sterol metabolic process
B9J08_003466	1.66869	0.00911303		Ortholog(s) have L-malate dehydrogenase activity, mRNA binding activity, role in NADH regeneration, fatty acid beta-oxidation and peroxisomal matrix, peroxisome localization
B9J08_004892	1.66375	6.01e-08		Protein of unknown function
B9J08_004831	1.66264	0.000973383		Ortholog of C. albicans SC5314 : C3_06470W_A/AAF1, C. dubliniensis CD36 : Cd36_86430, C. parapsilosis CDC317 : CPAR2_404190 and Candida tenuis NRRL Y-1498 : CANTEDRAFT_114929
B9J08_003167	1.66157	8.31e-05		Ortholog(s) have 4-hydroxybenzaldehyde dehydrogenase activity, carboxylate reductase activity
B9J08_002423	1.64795	0.00664871		Ortholog(s) have DNA-binding transcription activator activity, RNA polymerase II-specific, sequence-specific DNA binding, transcription cis-regulatory region binding activity
B9J08_001225	1.64597	0.000393969		Ortholog(s) have role in intracellular phosphate ion homeostasis, polyphosphate biosynthetic process and fungal-type vacuole membrane, vacuolar transporter chaperone complex localization
B9J08_005163	1.63688	5.78e-07		Ortholog(s) have fructose 1,6-bisphosphate 1-phosphatase activity, role in cellular response to glucose starvation, gluconeogenesis, reactive oxygen species metabolic process and cytosol, periplasmic space localization
B9J08_004445	1.62982	2.66e-21		Ortholog(s) have deoxyribodipyrimidine photo-lyase activity, mRNA binding activity
B9J08_003223	1.62689	0.00643028		Ortholog of C. albicans SC5314 : C4_05580C_A, C. dubliniensis CD36 : Cd36_45180, C. parapsilosis CDC317 : CPAR2_500500 and Candida tenuis NRRL Y-1498 : CANTEDRAFT_113522
B9J08_004878	1.60595	0.00106485		Ortholog(s) have ammonium transmembrane transporter activity, high-affinity secondary active ammonium transmembrane transporter activity
B9J08_002240	1.60407	4.1e-06		Has domain(s) with predicted hydrolase activity, hydrolyzing O-glycosyl compounds activity and role in carbohydrate metabolic process
B9J08_004545	1.59564	6.36e-09		Has domain(s) with predicted oligopeptide transmembrane transporter activity and role in transmembrane transport
B9J08_001588	1.59424	0.0012852		Has domain(s) with predicted heme binding, iron ion binding, monooxygenase activity, oxidoreductase activity, acting on paired donors and with incorporation or reduction of molecular oxygen, more
B9J08_002734	1.58405	0.00532268		Protein of unknown function
B9J08_000792	1.56748	2.37e-05		Has domain(s) with predicted catalytic activity
B9J08_000017	1.5564	0.00755772		Ortholog(s) have hydrolase activity, acting on ester bonds, triglyceride lipase activity, role in lipid homeostasis and lipid droplet localization
B9J08_003007	1.54465	0.00603884		Ortholog of C. parapsilosis CDC317 : CPAR2_600360, Candida tenuis NRRL Y-1498 : CANTEDRAFT_117968, Debaryomyces hansenii CBS767 : DEHA2E01584g and Pichia stipitis Pignal : PICST_82544
B9J08_003454	1.5421	0.00311783		Has domain(s) with predicted DNA binding, methyltransferase activity, zinc ion binding activity and role in DNA repair, regulation of DNA-templated transcription
B9J08_001255	1.54171	1.46e-07		Ortholog(s) have dextrin alpha-glucosidase activity, maltose alpha-glucosidase activity, oligo-1,6-glucosidase activity, starch alpha-glucosidase activity, sucrose alpha-glucosidase activity and role in disaccharide catabolic process
B9J08_002735	1.53936	0.00803802		Has domain(s) with predicted role in deadenylation-independent decapping of nuclear-transcribed mRNA
B9J08_003374	1.53023	0.000143968		Ortholog(s) have isocitrate lyase activity, role in glyoxylate cycle and cytoplasm localization
B9J08_000030	1.52115	5.77e-06		Ortholog of C. albicans SC5314 : CR_00310C_A, C. dubliniensis CD36 : Cd36_25350, C. parapsilosis CDC317 : CPAR2_800410 and Candida tenuis NRRL Y-1498 : CANTEDRAFT_114085
B9J08_001181	1.51743	0.00223334		Ortholog(s) have phosphatidic acid binding, transcription corepressor activity
B9J08_002560	1.50981	3.46e-05		Ortholog(s) have lipase activity, structural constituent of cell wall activity, role in fungal-type cell wall organization and fungal-type cell wall localization
B9J08_002773	1.50684	0.00579765		Protein of unknown function
B9J08_003462	1.50198	0.00187064		Ortholog(s) have peroxisome matrix targeting signal-1 binding, protein carrier chaperone, protein-macromolecule adaptor activity and role in protein import into peroxisome matrix, protein import into peroxisome matrix, docking
B9J08_000829	1.48968	0.00426955		Ortholog of S. cerevisiae : YGR067C, C. albicans SC5314 : C6_01500C_A/TRY5, C. glabrata CBS138 : CAGL0K04631g, C. dubliniensis CD36 : Cd36_61610 and C. parapsilosis CDC317 : CPAR2_602450
B9J08_005080	1.48179	0.00097909		Ortholog of Candida tenuis NRRL Y-1498 : CANTEDRAFT_113685, Debaryomyces hansenii CBS767 : DEHA2D03938g and Candida lusitaniae ATCC 42720 : CLUG_02430
B9J08_002255	1.47909	0.000934143		Protein of unknown function
B9J08_004104	1.46795	0.000894896		Protein of unknown function
B9J08_000501	1.45715	0.00553		Has domain(s) with predicted calcium-activated cation channel activity and membrane localization
B9J08_004637	1.45569	0.00139234		Protein of unknown function
B9J08_002652	1.44687	8.68e-07		Ortholog(s) have citrate (Si)-synthase activity, role in acetyl-CoA catabolic process, citrate metabolic process, tricarboxylic acid cycle and mitochondrion localization
B9J08_002165	1.44582	0.000148015		Ortholog(s) have SNAP receptor activity, phosphatidylinositol-3-phosphate binding activity
B9J08_001831	1.43525	0.0017846		Ortholog of C. albicans SC5314 : C1_05950C_A, C. dubliniensis CD36 : Cd36_05610, C. parapsilosis CDC317 : CPAR2_103700 and Candida tenuis NRRL Y-1498 : CANTEDRAFT_95139
B9J08_000474	1.43204	0.00251374		Ortholog(s) have plasma membrane localization
B9J08_003392	1.42231	0.00024047		Has domain(s) with predicted membrane localization
B9J08_000847	1.42195	0.00678414		Ortholog(s) have protein kinase activity, pyruvate dehydrogenase (acetyl-transferring) kinase activity, role in protein-containing complex assembly, regulation of mitophagy and mitochondrion localization
B9J08_002201	1.41652	0.000805119		Ortholog(s) have role in iron-sulfur cluster assembly, protein maturation by [4Fe-4S] cluster transfer, protein maturation by iron-sulfur cluster transfer and mitochondrial matrix localization
B9J08_000925	1.41637	0.000484197		Ortholog(s) have armadillo repeat domain binding, protein kinase regulator activity
B9J08_001235	1.41549	0.000771486		Ortholog of C. albicans SC5314 : C1_11850W_A, C. dubliniensis CD36 : Cd36_11100, C. parapsilosis CDC317 : CPAR2_203550 and Candida tenuis NRRL Y-1498 : CANTEDRAFT_113695
B9J08_005147	1.40894	0.00164316		Ortholog of C. parapsilosis CDC317 : CPAR2_107030, Candida tenuis NRRL Y-1498 : CANTEDRAFT_95488, Debaryomyces hansenii CBS767 : DEHA2D16654g and Candida guilliermondii ATCC 6260 : PGUG_00622
B9J08_002027	1.40554	0.000306871		Ortholog(s) have DNA-binding transcription factor activity, RNA polymerase II-specific and RNA polymerase II cis-regulatory region sequence-specific DNA binding, more
B9J08_004877	1.39549	0.00859832		Ortholog of C. parapsilosis CDC317 : CPAR2_500580, Candida tenuis NRRL Y-1498 : CANTEDRAFT_114095, Debaryomyces hansenii CBS767 : DEHA2D03256g and Pichia stipitis Pignal : PICST_86494
B9J08_004458	1.38604	0.000162083		Has domain(s) with predicted DNA-binding transcription factor activity, RNA polymerase II-specific, zinc ion binding activity and role in regulation of DNA-templated transcription
B9J08_005081	1.3821	3.74e-05		Ortholog(s) have phosphatidylethanolamine binding, protein tag activity
B9J08_002256	1.37403	6.48e-06		Protein of unknown function
B9J08_002628	1.37311	0.00279087		Ortholog(s) have DNA-binding transcription activator activity, RNA polymerase II-specific, RNA polymerase II cis-regulatory region sequence-specific DNA binding activity
B9J08_004351	1.37232	0.00915864		Ortholog(s) have RNA endonuclease activity, role in RNA catabolic process, apoptotic process, cell morphogenesis and cytosol, extracellular region, fungal-type vacuole, vacuole localization
B9J08_003258	1.37025	2.34e-11		Ortholog(s) have SNARE binding, molecular adaptor activity, protein kinase activator activity
B9J08_003969	1.36947	0.00781016		Has domain(s) with predicted DASH complex, mitotic spindle localization
B9J08_004027	1.36629	0.00561424		Ortholog of S. cerevisiae : MIT1, C. albicans SC5314 : C1_10150W_A/WOR1, C. glabrata CBS138 : CAGL0L02453g, C. dubliniensis CD36 : Cd36_09540 and C. parapsilosis CDC317 : CPAR2_805000
B9J08_003912	1.36162	3.86e-10		Has domain(s) with predicted aspartic-type endopeptidase activity and role in proteolysis
B9J08_003750	1.35824	0.000107365		Ortholog of C. albicans SC5314 : C3_04630W_A, C. dubliniensis CD36 : Cd36_84580, C. parapsilosis CDC317 : CPAR2_404290 and Candida tenuis NRRL Y-1498 : CANTEDRAFT_115338
B9J08_000928	1.35106	6.18e-05		Ortholog(s) have water channel activity, role in ascospore formation, transmembrane transport, water transport and plasma membrane localization
B9J08_004366	1.34941	0.000864672		Protein of unknown function
B9J08_001291	1.34825	0.000144145		Ortholog(s) have sterol esterase activity, role in cellular lipid metabolic process, sterol metabolic process and lipid droplet, membrane localization
B9J08_000010	1.34822	0.00456164		Ortholog(s) have carnitine O-acetyltransferase activity, role in carnitine metabolic process and mitochondrion, peroxisome localization
B9J08_004940	1.34179	1.32e-07		Ortholog of Candida guilliermondii ATCC 6260 : PGUG_04694 and Candida lusitaniae ATCC 42720 : CLUG_00973
B9J08_000995	1.33918	0.00151889		Ortholog(s) have sulfate transmembrane transporter activity, role in sulfate transport, transmembrane transport and plasma membrane localization
B9J08_000591	1.33887	2.66e-06		Has domain(s) with predicted calcium-activated cation channel activity and membrane localization
B9J08_003694	1.33446	2.6e-05		Ortholog of C. albicans SC5314 : C1_05520W_A, C. dubliniensis CD36 : Cd36_05240, C. parapsilosis CDC317 : CPAR2_107620 and Candida tenuis NRRL Y-1498 : CANTEDRAFT_133479
B9J08_002334	1.33278	0.000742306		Ortholog of C. albicans SC5314 : C2_06990W_A, C. dubliniensis CD36 : Cd36_21280, C. parapsilosis CDC317 : CPAR2_406680, Debaryomyces hansenii CBS767 : DEHA2D07612g and Pichia stipitis Pignal : PICST_62360
B9J08_003909	1.32938	0.00302606		Protein of unknown function
B9J08_003019	1.32098	2.88e-06		Ortholog(s) have lysophosphatidylethanolamine acyltransferase activity, triglyceride lipase activity and role in cell budding, cellular lipid metabolic process, triglyceride catabolic process, triglyceride mobilization
B9J08_004367	1.31558	0.0034235		Has domain(s) with predicted nucleic acid binding activity
B9J08_005002	1.30496	1.45e-07		Has domain(s) with predicted actin filament binding activity and role in actin cytoskeleton organization
B9J08_001352	1.29967	0.0028335		Ortholog(s) have role in peroxisome organization and peroxisomal membrane localization
B9J08_005199	1.29932	8.68e-07		Ortholog(s) have transcription coactivator activity and role in positive regulation of transcription by RNA polymerase II, response to arsenic-containing substance, response to cadmium ion, sulfur amino acid metabolic process
B9J08_004934	1.29357	0.00649268		Ortholog(s) have role in chromosome segregation and MIS12/MIND type complex, condensed chromosome, centromeric region, kinetochore, spindle pole localization
B9J08_004479	1.29128	2.74e-07		Has domain(s) with predicted oligopeptide transmembrane transporter activity and role in transmembrane transport
B9J08_001968	1.2788	0.00906488		Has domain(s) with predicted oxidoreductase activity, oxidoreductase activity, acting on the aldehyde or oxo group of donors, NAD or NADP as acceptor activity and role in cellular aldehyde metabolic process
B9J08_000873	1.27452	0.00985089		Ortholog(s) have RNA binding activity, role in mRNA processing and cytosol, mRNA cleavage and polyadenylation specificity factor complex, nucleus localization
B9J08_000292	1.27444	0.000157798		Ortholog of C. albicans SC5314 : C1_08530W_A, C. dubliniensis CD36 : Cd36_08040, C. parapsilosis CDC317 : CPAR2_207180 and Candida tenuis NRRL Y-1498 : CANTEDRAFT_114140
B9J08_003280	1.2683	0.000662188		Ortholog(s) have RNA polymerase II-specific DNA-binding transcription factor binding activity
B9J08_003397	1.26792	0.00620248		Ortholog(s) have alpha,alpha-trehalase activity, role in trehalose catabolic process, trehalose transport and cell wall-bounded periplasmic space, fungal-type cell wall, fungal-type vacuole localization
B9J08_001889	1.26498	0.00456164		Ortholog(s) have carnitine:acyl carnitine antiporter activity, role in fatty acid metabolic process and mitochondrial inner membrane localization
B9J08_003448	1.26239	0.000201106		Ortholog(s) have DNA-binding transcription factor activity, RNA polymerase II-specific, RNA polymerase II-specific DNA-binding transcription factor binding, cis-regulatory region sequence-specific DNA binding activity
B9J08_002576	1.25861	0.000104979		Has domain(s) with predicted DNA-binding transcription factor activity, RNA polymerase II-specific, zinc ion binding activity and role in regulation of DNA-templated transcription
B9J08_002351	1.2576	1.23e-06		Ortholog(s) have sulfate adenylyltransferase (ATP) activity
B9J08_002669	1.2573	0.00664871		Ortholog(s) have phosphoenolpyruvate carboxykinase (ATP) activity and cytosol localization
B9J08_000905	1.25108	0.00397583		Ortholog of C. albicans SC5314 : C3_05450C_A, C. dubliniensis CD36 : Cd36_85440, C. parapsilosis CDC317 : CPAR2_405750 and Candida tenuis NRRL Y-1498 : CANTEDRAFT_116050
B9J08_003689	1.24553	0.00220488		Ortholog(s) have phosphatidylinositol-3-phosphate binding, ubiquitin protein ligase activity, ubiquitin-protein transferase activity
B9J08_001371	1.24501	0.00344791		Ortholog(s) have RNA polymerase II cis-regulatory region sequence-specific DNA binding activity
B9J08_003709	1.24107	0.00480238		Has domain(s) with predicted N,N-dimethylaniline monooxygenase activity, NADP binding, flavin adenine dinucleotide binding activity
B9J08_000615	1.24036	0.0017018		Ortholog of S. cerevisiae : YDR262W, C. albicans SC5314 : C1_03120W_A, C. glabrata CBS138 : CAGL0M08734g, C. dubliniensis CD36 : Cd36_02920 and C. parapsilosis CDC317 : CPAR2_108490
B9J08_002886	1.23335	0.000319323		Ortholog(s) have role in intracellular phosphate ion homeostasis
B9J08_003186	1.22543	0.00574311		Has domain(s) with predicted acyl-CoA hydrolase activity and role in acyl-CoA metabolic process
B9J08_002330	1.21141	0.000228867		Ortholog of Candida lusitaniae ATCC 42720 : CLUG_04267
B9J08_002279	1.20925	1.59e-06		Ortholog(s) have DNA-binding transcription factor activity and role in regulation of transcription by RNA polymerase II
B9J08_002149	1.18041	0.000189404		Ortholog(s) have role in fungal-type cell wall organization
B9J08_001834	1.18019	0.00532268		Ortholog(s) have spermidine transmembrane transporter activity, spermine transmembrane transporter activity, role in spermidine transport, spermine transport and fungal-type vacuole membrane, plasma membrane localization
B9J08_003564	1.17049	0.00672379		Ortholog(s) have role in cellular response to glucose starvation, protein localization to eisosome filament and eisosome localization
B9J08_000397	1.16751	0.000106689		Ortholog(s) have role in fatty acid oxidation, peroxisome fission and endoplasmic reticulum, peroxisomal importomer complex, peroxisomal membrane localization
B9J08_004971	1.16195	0.00932734		Protein of unknown function
B9J08_003337	1.16151	0.000485908		Protein of unknown function
B9J08_000690	1.15964	0.00167565		Ortholog(s) have role in endocytosis and actin cortical patch localization
B9J08_002577	1.15898	5.76e-07		Has domain(s) with predicted hydrolase activity, hydrolase activity, acting on carbon-nitrogen (but not peptide) bonds, in linear amidines activity
B9J08_002763	1.15838	0.0034235		Ortholog(s) have long-chain fatty acid-CoA ligase activity, myristoyl-CoA ligase activity, oleoyl-CoA ligase activity, palmitoyl-CoA ligase activity
B9J08_000348	1.15376	2.82e-05		Ortholog(s) have DNA-binding transcription repressor activity, RNA polymerase II-specific, sequence-specific DNA binding activity
B9J08_001132	1.1532	7.03e-06		Ortholog(s) have role in nonfunctional rRNA decay and cytoplasm localization
B9J08_003955	1.15279	0.00187579		Ortholog of C. albicans SC5314 : C3_04580C_A/STP1, C. dubliniensis CD36 : Cd36_84540, C. parapsilosis CDC317 : CPAR2_805900 and Candida tenuis NRRL Y-1498 : CANTEDRAFT_115344
B9J08_004551	1.14953	0.0074585		Has domain(s) with predicted serine-type endopeptidase activity, serine-type peptidase activity and role in proteolysis
B9J08_003227	1.14894	0.00304537		Ortholog(s) have DNA-binding transcription factor activity, sequence-specific DNA binding activity, role in positive regulation of transcription by RNA polymerase II and nucleus localization
B9J08_000043	1.14831	0.00553		Ortholog of S. cerevisiae : YML020W, C. albicans SC5314 : C3_06290W_A, C. glabrata CBS138 : CAGL0G07062g, C. dubliniensis CD36 : Cd36_86190 and C. parapsilosis CDC317 : CPAR2_404740
B9J08_001721	1.14511	6.36e-09		Ortholog of C. albicans SC5314 : C1_12140W_A, C. dubliniensis CD36 : Cd36_11370, C. parapsilosis CDC317 : CPAR2_207480 and Candida tenuis NRRL Y-1498 : CANTEDRAFT_120384
B9J08_000032	1.14024	0.00294324		Ortholog(s) have ATPase-coupled transmembrane transporter activity, role in ATP transport, fatty acid transport and peroxisomal membrane, peroxisome localization
B9J08_004135	1.13354	0.00279087		Has domain(s) with predicted role in regulation of DNA-templated transcription
B9J08_005107	1.12826	0.000914825		Ortholog(s) have DNA-binding transcription activator activity, RNA polymerase II-specific, RNA polymerase II cis-regulatory region sequence-specific DNA binding activity
B9J08_002842	1.12185	0.00494526		Ortholog(s) have role in eisosome assembly and eisosome localization
B9J08_004316	1.12015	0.0039		Ortholog(s) have cytoplasm localization
B9J08_001041	1.11352	0.00737624		Has domain(s) with predicted role in peroxisome fission and peroxisomal membrane localization
B9J08_004524	1.1117	0.00962402		Ortholog(s) have guanyl nucleotide binding activity and role in Golgi organization
B9J08_000814	1.10692	0.00378244		Ortholog(s) have GTPase activator activity, role in vesicle-mediated transport and cytoplasm, peroxisome localization
B9J08_005255	1.10509	0.0034235		Ortholog(s) have chromatin binding activity, role in DNA damage response, regulation of gene expression and chromatin, nucleus localization
B9J08_000029	1.10384	6.69e-05		Ortholog(s) have cyclin-dependent protein serine/threonine kinase regulator activity and role in negative regulation of macroautophagy, regulation of protein stability
B9J08_004113	1.09837	9.7e-05		Has domain(s) with predicted transmembrane transporter activity and role in transmembrane transport
B9J08_001116	1.09769	0.00412898		Has domain(s) with predicted role in lipid metabolic process
B9J08_004939	1.0904	0.00279087		Ortholog(s) have Atg8-family ligase activity
B9J08_000071	1.0889	0.000134038		Ortholog(s) have lipid binding activity and role in eisosome assembly, endocytosis, endoplasmic reticulum-plasma membrane tethering, protein localization, protein localization to eisosome filament
B9J08_001480	1.08888	1.56e-08		Protein of unknown function
B9J08_005386	1.08151	0.00269204		Ortholog of C. albicans SC5314 : C6_01620W_A, C. dubliniensis CD36 : Cd36_61710, C. parapsilosis CDC317 : CPAR2_602540 and Candida tenuis NRRL Y-1498 : CANTEDRAFT_136164
B9J08_001008	1.07598	0.00799194		Ortholog(s) have protein phosphatase 1 binding, protein phosphatase regulator activity and role in chromosome segregation
B9J08_001224	1.07012	0.000456518		Ortholog(s) have sulfite reductase (NADPH) activity, role in sulfate assimilation, sulfur amino acid biosynthetic process and sulfite reductase complex (NADPH) localization
B9J08_005302	1.06893	0.00976949		Ortholog(s) have acireductone dioxygenase (Ni2+-requiring) activity and role in L-methionine salvage from methylthioadenosine
B9J08_004988	1.06636	1.77e-05		Has domain(s) with predicted DNA-binding transcription factor activity and role in regulation of DNA-templated transcription
B9J08_003744	1.06237	0.000143968		Ortholog of Debaryomyces hansenii CBS767 : DEHA2E16720g, Pichia stipitis Pignal : PICST_29139 and Candida lusitaniae ATCC 42720 : CLUG_03027
B9J08_002972	1.06114	0.00737624		Ortholog(s) have peptide-methionine (R)-S-oxide reductase activity, role in cellular response to oxidative stress and mitochondrion localization
B9J08_004098	1.05257	0.00683968		Protein of unknown function
B9J08_005514	1.04998	0.000336098		Ortholog(s) have SNAP receptor activity and role in autophagosome maturation, piecemeal microautophagy of the nucleus, vacuole fusion, non-autophagic, vesicle docking, vesicle fusion, vesicle fusion with vacuole
B9J08_003948	1.04178	0.0053357		Ortholog(s) have AMP-activated protein kinase activity, enzyme-substrate adaptor activity and role in regulation of protein-containing complex assembly, signal transduction
B9J08_004750	1.04143	0.00229372		Ortholog of C. albicans SC5314 : C3_07030C_A, C. dubliniensis CD36 : Cd36_86960, C. parapsilosis CDC317 : CPAR2_808800 and Candida tenuis NRRL Y-1498 : CANTEDRAFT_113621
B9J08_000824	1.03606	0.00227359		Ortholog of C. albicans SC5314 : C1_10400C_A/FGR41, C. dubliniensis CD36 : Cd36_09790, C. parapsilosis CDC317 : CPAR2_207330 and Candida tenuis NRRL Y-1498 : cten_CGOB_00030
B9J08_004584	1.0347	0.00801881		Has domain(s) with predicted transmembrane transporter activity and role in transmembrane transport
B9J08_004847	1.03089	0.00252073		Ortholog(s) have calmodulin binding activity and role in microautophagy, polyphosphate metabolic process, protein localization, vacuolar transport, vacuole fusion, non-autophagic
B9J08_001615	1.01645	0.00592531		Ortholog(s) have protein-macromolecule adaptor activity, role in ER-dependent peroxisome organization, peroxisome inheritance, protein import into peroxisome membrane and endoplasmic reticulum, peroxisomal membrane, peroxisome localization
B9J08_002259	1.01342	2.93e-05		Ortholog(s) have role in fructose transmembrane transport, glucose mediated signaling pathway, glucose transmembrane transport, mannose transmembrane transport, negative regulation of meiotic nuclear division
B9J08_001364	1.01335	0.00128845		Has domain(s) with predicted heme binding, iron ion binding, monooxygenase activity, oxidoreductase activity, acting on paired donors, with incorporation or reduction of molecular oxygen activity
B9J08_004883	1.0089	0.00053678		Has domain(s) with predicted DNA-binding transcription factor activity, RNA polymerase II-specific, zinc ion binding activity and role in regulation of DNA-templated transcription
B9J08_004793	1.00602	0.00148387		Ortholog(s) have fungal-type vacuole lumen, fungal-type vacuole membrane localization
B9J08_000593	1.00192	3.54e-06		Has domain(s) with predicted phosphatidylinositol binding activity
B9J08_003070	1.00182	0.000908539		Ortholog of C. albicans SC5314 : C6_02110W_A, C. dubliniensis CD36 : Cd36_62270, C. parapsilosis CDC317 : CPAR2_602240 and Candida tenuis NRRL Y-1498 : CANTEDRAFT_114419
B9J08_005078	-1.00479	1.18e-13		Ortholog(s) have adenine deaminase activity and role in adenine catabolic process, hypoxanthine salvage, purine-containing compound salvage
B9J08_000169	-1.0298	6.19e-05		Ortholog(s) have sulfiredoxin activity and role in cellular response to oxidative stress
B9J08_003190	-1.03015	2.99e-05		Ortholog(s) have thiamine pyrophosphate transmembrane transporter activity, role in mitochondrial thiamine pyrophosphate transmembrane transport and mitochondrial inner membrane localization
B9J08_002262	-1.03305	0.000120135		Ortholog(s) have glucosidase activity and role in (1->6)-beta-D-glucan biosynthetic process, fungal-type cell wall organization
B9J08_000645	-1.03697	4.23e-07		Ortholog(s) have kinase regulator activity, peroxidase activity, peroxiredoxin activity, ribosome binding, thioredoxin peroxidase activity, thioredoxin-dependent peroxiredoxin activity, unfolded protein binding activity
B9J08_004475	-1.05306	0.000144145		Has domain(s) with predicted transmembrane transporter activity and role in transmembrane transport
B9J08_002110	-1.0631	0.00701825		Ortholog(s) have siderophore-iron transmembrane transporter activity, role in siderophore transport, siderophore-dependent iron import into cell and cytoplasmic vesicle, endosome, plasma membrane localization
B9J08_002481	-1.10624	0.00267877		Has domain(s) with predicted transmembrane transporter activity, role in transmembrane transport and membrane localization
B9J08_000634	-1.10698	0.000387839		Ortholog(s) have role in bipolar cellular bud site selection, intracellular monoatomic cation homeostasis and nucleus localization
B9J08_000777	-1.13288	7.04e-05		Ortholog(s) have ubiquitin protein ligase binding activity
B9J08_000844	-1.13378	5.86e-05		Has domain(s) with predicted oxidoreductase activity and mitochondrion localization
B9J08_005322	-1.13462	0.00456164		Has domain(s) with predicted transmembrane transporter activity and role in transmembrane transport
B9J08_003016	-1.13879	5.09e-05		Has domain(s) with predicted mannosyltransferase activity
B9J08_002556	-1.14009	0.00113972		Ortholog(s) have role in aerobic respiration and mitochondrial intermembrane space localization
B9J08_001686	-1.15394	0.00153924		Has domain(s) with predicted RNA binding, structural constituent of ribosome activity, role in translation and ribosome localization
B9J08_003585	-1.16557	0.00737914		Ortholog(s) have DNA-binding transcription activator activity, RNA polymerase II-specific, DNA-binding transcription factor activity and RNA polymerase II-specific, more
B9J08_003914	-1.18608	0.00554224		Ortholog(s) have role in actin cytoskeleton organization, negative regulation of phospholipid translocation, vacuole organization and plasma membrane localization
B9J08_001428	-1.23191	9.09e-05		Ortholog(s) have dicarboxylic acid transmembrane transporter activity, role in dicarboxylic acid transport and mitochondrial envelope localization
B9J08_000036	-1.24762	0.000879113		Protein of unknown function
B9J08_001952	-1.26778	0.000130635		Has domain(s) with predicted transmembrane transporter activity, role in transmembrane transport and membrane localization
B9J08_001894	-1.32502	0.0012757		Ortholog of C. albicans SC5314 : C3_01640C_A, C. dubliniensis CD36 : Cd36_81550, C. parapsilosis CDC317 : CPAR2_503570 and Candida tenuis NRRL Y-1498 : cten_CGOB_00261
B9J08_003903	-1.33195	6.48e-06		Ortholog(s) have fungal-type cell wall localization
B9J08_004360	-1.34872	1.04e-14		Ortholog(s) have peroxisome localization
B9J08_001670	-1.36916	3.81e-08		Ortholog(s) have methylthioribulose 1-phosphate dehydratase activity and role in L-methionine salvage from methylthioadenosine
B9J08_003408	-1.37441	0.0083188		Ortholog of Candida lusitaniae ATCC 42720 : CLUG_01446
B9J08_003684	-1.38985	0.00617694		Has domain(s) with predicted NAD binding, glycerol-3-phosphate dehydrogenase [NAD(P)+] activity, oxidoreductase activity, oxidoreductase activity and acting on the CH-OH group of donors, more
B9J08_002218	-1.44672	0.00638502		Protein of unknown function
B9J08_005563	-1.46811	5.06e-05		Protein of unknown function
B9J08_004468	-1.51209	0.00296695		Has domain(s) with predicted oxidoreductase activity
B9J08_002616	-1.53202	0.00304537		Ortholog of S. cerevisiae : YGL138C, C. albicans SC5314 : C3_00990C_A, C. glabrata CBS138 : CAGL0H08910g, C. dubliniensis CD36 : Cd36_80910 and C. parapsilosis CDC317 : CPAR2_102230
B9J08_000701	-1.54218	0.00106408		Has domain(s) with predicted oxidoreductase activity
B9J08_000918	-1.54418	0.000158492		Ortholog of C. albicans SC5314 : C4_04530C_A/PHR1, C. dubliniensis CD36 : Cd36_44230/PHR1, C. parapsilosis CDC317 : CPAR2_302140/PHR1 and Candida tenuis NRRL Y-1498 : CANTEDRAFT_114565
B9J08_002108	-1.55339	0.0039604		Ortholog(s) have high-affinity ferrous iron transmembrane transporter activity, iron ion transmembrane transporter activity and role in arsenate ion transmembrane transport, iron ion transmembrane transport, reductive iron assimilation
B9J08_001792	-1.58939	0.000101919		Ortholog of C. albicans SC5314 : C4_01230C_A, C. dubliniensis CD36 : Cd36_41220, C. parapsilosis CDC317 : CPAR2_403860 and Candida tenuis NRRL Y-1498 : CANTEDRAFT_116117
B9J08_001292	-1.6077	2.46e-05	SOD4	Copper-containing superoxide dismutase, induced during iron starvation
B9J08_005006	-1.65438	5.76e-07		Protein of unknown function
B9J08_001948	-1.65963	2.88e-06		Protein of unknown function
B9J08_004797	-1.68511	0.00701825		Ortholog(s) have fungal-type vacuole, plasma membrane localization
B9J08_002217	-1.78922	5.63e-06		Has domain(s) with predicted DNA binding, DNA-binding transcription factor activity, RNA polymerase II-specific, zinc ion binding activity and role in DNA-templated transcription, regulation of DNA-templated transcription
B9J08_004886	-1.83668	0.00781016		Has domain(s) with predicted oxidoreductase activity
B9J08_001450	-1.86807	0.000387839		Ortholog(s) have ferric-chelate reductase activity, role in copper ion import, iron ion transport, nuclear-transcribed mRNA catabolic process, nonsense-mediated decay and plasma membrane localization
B9J08_002295	-1.90388	5.27e-05		Protein of unknown function
B9J08_004378	-1.91951	5.14e-05		Ortholog(s) have glycerol-1-phosphatase activity, role in glycerol biosynthetic process and cytoplasm localization
B9J08_001519	-1.99366	0.00574311		Has domain(s) with predicted transmembrane transporter activity and role in transmembrane transport
B9J08_000656	-2.05157	8.52e-07	MGD1	Putative methylglyoxal reductase; expression appears to be induced by the transcription factor Mrr1p in response to methylglyoxal and benomyl
B9J08_002974	-2.09355	0.000439865		Ortholog(s) have biotin transmembrane transporter activity, dethiobiotin transmembrane transporter activity, solute:proton symporter activity and role in biotin import across plasma membrane, dethiobiotin import across plasma membrane
B9J08_002582	-2.15633	9.97e-05		Putative cell-surface adhesin, similar to C. albicans Als3p
B9J08_004884	-2.70178	0.00107653		Has domain(s) with predicted hydrolase activity, hydrolase activity, acting on carbon-nitrogen (but not peptide) bonds activity
B9J08_003908	-2.75666	1.51e-06		Has domain(s) with predicted transmembrane transporter activity and role in transmembrane transport
B9J08_001548	-2.88897	0.000353879		Protein of unknown function
B9J08_001549	-3.15235	5.87e-11		Putative glycosylphosphatidylinositol-anchored protein; unique to C. auris and useful for strain typing; contains an N-terminal signal peptide for secretion and a C-terminal glycosylphosphatidylinositol
B9J08_001546	-3.23377	3.86e-10	SAP3	Primary aspartic-type endopeptidase; null mutant shows reduced secretion of aspartyl protease, reduced biofilm and hyphae formation, and reduced virulence in a mouse systemic infection model
B9J08_002136	-8.7567	1.93e-71		Has domain(s) with predicted DNA-binding transcription factor activity, RNA polymerase II-specific, zinc ion binding activity and role in regulation of DNA-templated transcription
