# Supplementary material for: Functional redundancy in Candida auris cell surface adhesins crucial for cell-cell interaction and aggregation
Source: Springer Nature journal article supplement (doi:10.1038/s41467-024-53588-5), 2024-10-25
Supplement: MOESM8 [file 41467_2024_53588_MOESM8_ESM.xlsx]

## Sheet: Fig.3A
	AR0382 (OD490)	Δscf1 (OD490)	Δals4112 (OD490)	Δscf1+Δals4112 (OD490)
Replicate1	0.576	0.23	0.463	0.411
Replicate1	0.549	0.305	0.523	0.459
Replicate1	0.61	0.415	0.526	0.527
Replicate1	0.548	0.39	0.574	0.472
Replicate2	0.689	0.239	0.449	0.382
Replicate2	0.569	0.332	0.521	0.432
Replicate2	0.607	0.312	0.521	0.476
Replicate2	0.566	0.313	0.602	0.485
Replicate3	0.499	0.293	0.443	0.668
Replicate3	0.588	0.475	0.619	0.553
Replicate3	0.677	0.504	0.612	0.56
Replicate3	0.637	0.355	0.55	0.488
	p-value
AR0382 vs Δals4112	0.421316	ns
AR0382 vs Δscf1	0.0006888	***
AR0382 vs Δals4112+Δscf1	0.0972096	ns
Δals4112 vs Δscf1	0.0041468	**
Δals4112 vs Δals4112+Δscf1	0.692016	ns
Δscf1 vs Δals4112+Δscf1	0.0171883	*

## Sheet: Fig.3D
Minutes	AR0382 (OD600)	Δscf1 (OD600)	Δals4112 (OD600)	Δscf1+Δals4112 (OD600)
0	2.158	1.762	1.947	1.858
	2.159	1.756	1.947	1.855
	2.149	1.758	1.947	1.856
10	2.073	1.745	1.94	1.845
	2.068	1.749	1.941	1.844
	2.063	1.743	1.942	1.84
20	2.043	1.733	1.925	1.808
	2.03	1.739	1.926	1.805
	2.03	1.735	1.928	1.804
30	2.014	1.73	1.921	1.773
	2.014	1.729	1.923	1.771
	2.011	1.733	1.922	1.77
40	2.002	1.725	1.912	1.752
	2.002	1.723	1.912	1.752
	1.999	1.725	1.913	1.748
50	1.987	1.71	1.894	1.729
	1.987	1.717	1.896	1.728
	1.979	1.713	1.897	1.727
60	1.975	1.703	1.884	1.708
	1.972	1.709	1.889	1.705
	1.973	1.714	1.89	1.703
70	1.966	1.706	1.882	1.683
	1.961	1.71	1.878	1.686
	1.964	1.703	1.879	1.682
80	1.953	1.685	1.866	1.625
	1.95	1.694	1.868	1.632
	1.952	1.7	1.867	1.631
90	1.929	1.682	1.856	1.612
	1.931	1.687	1.857	1.611
	1.927	1.693	1.856	1.614
100	1.917	1.682	1.844	1.592
	1.921	1.68	1.845	1.596
	1.922	1.682	1.844	1.599
110	1.915	1.668	1.83	1.58
	1.918	1.663	1.83	1.584
	1.921	1.658	1.835	1.583
120	1.906	1.646	1.825	1.56
	1.904	1.638	1.828	1.569
	1.907	1.639	1.83	1.57

## Sheet: Fig.6A
AR0382																					Δals4112																						Δscf1
Cell#1				Cell#2					inset: force curves												Cell#1					Cell#2					inset: force curves												Cell#1					Cell#2
Adhesion force	Bin center	Relative Frequency		Adhesion force	Bin center	Relative Frequency			Length (x)	Adhesion force (y)			Length (x)	Adhesion force (y)			Length (x)	Adhesion force (y)			Adhesion force	Bin center	Relative Frequency			Adhesion force	Bin center	Relative Frequency			Length (x)	Adhesion force (y)			Length (x)	Adhesion force (y)			Length (x)	Adhesion force (y)			Adhesion force	Bin center	Relative Frequency			Adhesion force	Bin center
pN	pN	%		pN	pN	%			nm	pN			nm	pN			nm	pN			pN	pN	%			pN	pN	%			nm	pN			nm	pN			nm	pN			pN	pN	%			pN	pN
331.215	8	0.50505		417.71	8	27.6423			-30.6532	293.503			-39.0961	264.041			-26.5014	202.943			44.4479	8	80.3922			285.582	8	73.4375			-130.096	248.235			-129.894	219.173			-128.884	243.185			171.702	8	46.0938			364.606	8
200.831	24	0		356.35	24	0			-30.2221	291.368			-38.5849	261.038			-25.9184	200.966			236.076	24	0			708.72	24	0			-129.838	247.464			-129.309	216.369			-128.379	241.998			66.2523	24	0			254.812	24
171.994	40	0		179.792	40	0			-29.7947	288.724			-38.2848	257.32			-25.4173	198.439			143.285	40	0.78431			1385.47	40	0			-129.119	246.51			-129.178	213.122			-127.99	240.71			123.894	40	1.95313			195.676	40
190.858	56	0		797.113	56	0			-29.3317	285.466			-37.8837	252.786			-25.0098	195.366			102.849	56	0.78431			1234.95	56	0			-128.755	245.366			-128.746	209.35			-127.585	239.339			113.936	56	2.73438			173.796	56
435.734	72	0		467.104	72	0			-28.9397	281.504			-37.3771	247.377			-24.817	191.756			149.433	72	1.56863			1212.39	72	1.17188			-128.286	244.068			-128.19	205.075			-127.069	237.916			133.549	72	6.64063			170.631	72
118.641	88	0.50505		475.221	88	0.4065			-28.4759	276.804			-37.0006	241.144			-24.3677	187.686			183.546	88	0.78431			1406.76	88	0.39063			-127.75	242.636			-127.643	200.334			-126.556	236.475			102.688	88	7.8125			88.4623	88
110.875	104	0.50505		579.94	104	0			-27.9211	271.371			-36.575	234.218			-23.701	183.22			71.2774	104	2.35294			1340.08	104	0.78125			-127.506	241.119			-127.397	195.193			-126.07	235.046			127.358	104	8.98438			93.5372	104
240.612	120	2.27273		600.738	120	0			-27.741	265.309			-36.3612	226.854			-23.2963	178.366			145.418	120	2.7451			1317.33	120	3.51563			-126.761	239.584			-127.103	189.795			-125.673	233.684			225.034	120	9.375			206.234	120
202.115	136	1.51515		569.319	136	0.4065			-27.2499	258.768			-35.8628	219.353			-22.9762	173.098			155.469	136	1.17647			1154.51	136	6.64063			-126.387	238.045			-126.536	184.216			-125.17	232.399			174.039	136	3.51563			111.965	136
450.464	152	2.52525		89.4712	152	0.4065			-26.8143	251.925			-35.5136	211.958			-22.5123	167.394			222.554	152	4.31373			1366.41	152	1.5625			-126.042	236.57			-126.119	178.498			-124.75	231.209			278.227	152	2.34375			104.035	152
156.112	168	1.51515		178.913	168	0.4065			-26.3859	244.988			-35.0588	204.817			-22.2186	161.262			176.534	168	2.35294			1272.99	168	3.125			-125.255	235.169			-125.666	172.673			-124.196	230.121			427.933	168	3.51563			88.6971	168
439.221	184	3.28283		378.953	184	0.81301			-26.0139	238.225			-34.6968	198.077			-21.6301	154.837			58.7335	184	1.96078			1399.55	184	2.73438			-125.053	233.984			-125.103	166.848			-123.666	229.141			113.101	184	1.17188			101.924	184
248.495	200	3.0303		479.264	200	0			-25.6501	231.849			-34.2676	191.716			-21.1145	148.324			173.193	200	0			1194.47	200	1.95313			-124.66	233.028			-125.057	161.186			-123.263	228.31			84.878	200	1.17188			95.624	200
181.06	216	4.79798		147.978	216	0			-25.2981	225.976			-33.8874	185.671			-21.0744	141.963			76.58	216	0.39216			1197.84	216	1.5625			-123.94	232.404			-124.528	155.795			-122.827	227.641			188.679	216	0			106.056	216
341.94	232	4.0404		390.765	232	0.81301			-24.7588	220.58			-33.318	179.829			-20.6743	136.02			79.108	232	0.39216			991.75	232	0.39063			-123.519	232.034			-124.038	150.751			-122.358	227.074			181.517	232	1.17188			323.286	232
244.791	248	5.80808		619.111	248	0.81301			-24.3677	215.511			-33.0425	174.15			-20.0804	130.652			43.8105	248	0			1339.72	248	0.78125			-123.093	231.79			-123.738	146.008			-121.888	226.486			204.351	248	0.78125			159.332	248
144.179	264	2.77778		359.945	264	0.81301			-23.7765	210.499			-32.5923	168.615			-19.5783	125.892			109.552	264	0			1329.1	264	0.78125			-122.491	231.55			-122.954	141.444			-121.179	225.661			149.58	264	0			119.636	264
204.238	280	3.78788		442.557	280	0.4065			-23.3036	205.378			-32.0529	163.263			-19.1836	121.685			1331.29	280	0			1320.77	280	0.78125			-122.15	231.078			-122.607	136.92			-120.786	224.381			164.15	280	0.39063			84.1614	280
341.886	296	3.78788		634.828	296	0			-23.0635	200.067			-31.8046	158.159			-18.8225	117.824			147.11	296	0			1081.99	296	0.39063			-121.434	230.251			-122.407	132.323			-120.36	222.5			108.654	296	0			68.2214	296
159.935	312	3.0303		796.021	312	1.21951			-22.5787	194.657			-31.4099	153.323			-18.3323	114.094			172.349	312	0			1116.36	312	0			-121.179	228.988			-121.852	127.715			-119.836	220.052			108.635	312	0.39063			57.0061	312
182.487	328	3.78788		490.752	328	1.62602			-22.2877	189.342			-30.8324	148.712			-17.8603	110.328			83.0441	328	0			1175.29	328	0			-120.543	227.276			-121.536	123.153			-119.571	217.26			196.995	328	0.39063			201.03	328
436.319	344	3.53535		435.424	344	0.4065			-21.7538	184.226			-30.4368	144.201			-17.2591	106.334			104.636	344	0			1321.28	344	0			-120.287	225.246			-120.937	118.672			-119.026	214.429			193.117	344	0			395.761	344
124.255	360	4.29293		800.798	360	2.03252			-21.2854	179.286			-29.8456	139.63			-17.0081	102.095			159.284	360	0			1278.99	360	0			-119.584	223.011			-120.527	114.286			-118.543	211.895			319.723	360	0.39063			138.02	360
243.211	376	3.78788		332.26	376	2.03252			-20.9171	174.311			-29.6019	134.88			-16.5779	97.6554			109.374	376	0			1292.77	376	0			-119.29	220.788			-120.088	109.907			-118.211	209.826			151.292	376	0			167.401	376
231.634	392	3.0303		1404.95	392	2.03252			-20.2641	169.032			-29.1116	129.906			-16.1286	93.1815			99.4347	392	0			1104.04	392	0			-118.942	218.8			-119.727	105.536			-117.707	208.278			127.246	392	0.39063			124.095	392
228.731	408	3.0303		446.32	408	4.87805			-19.9976	163.268			-28.6778	124.819			-15.7221	88.8878			154.486	408	0			725.925	408	0			-118.207	217.234			-119.255	101.277			-117.154	207.112			114.303	408	0			126.078	408
117.342	424	2.77778		725.184	424	5.69106			-19.5165	156.934			-28.3686	119.705			-15.1418	85.04			126.703	424	0			1018.78	424	0			-117.851	216.139			-118.661	97.2747			-116.571	206.1			95.1261	424	0.39063			115.531	424
188.551	440	2.52525		245.433	440	5.28455			-19.1154	150.208			-27.7692	114.738			-14.979	81.8594			128.804	440	0			978.269	440	0			-117.48	215.55			-118.568	93.7628			-116.108	205.068			79.272	440	0.39063			135.202	440
316.353	456	2.52525		420.126	456	3.25203			-18.9017	143.409			-27.5109	110.053			-14.5106	79.3913			162.369	456	0			927.726	456	0			-116.917	215.337			-118.011	90.8358			-115.789	203.893			140.096	456	0			154.79	456
209.872	472	3.53535		579.454	472	2.84553			-18.3605	136.851			-27.008	105.714			-13.7694	77.5388			73.6158	472	0			612.214	472	0			-116.28	215.37			-117.516	88.4359			-115.212	202.607			433.645	472	0			215.191	472
258.152	488	1.76768		406.599	488	1.21951			-18.0295	130.843			-26.5687	101.749			-13.4774	75.9992			158.634	488	0			1441.08	488	0			-115.774	215.426			-116.989	86.358			-114.835	201.319			64.6949	488	0			349.795	488
263.7	504	1.0101		688.21	504	1.21951			-17.4801	125.497			-26.0903	98.0945			-12.7671	74.3815			169.476	504	0			892.498	504	0			-115.546	215.319			-116.364	84.233			-114.239	200.073			77.8997	504	0			183.474	504
91.3643	520	1.51515		593.502	520	1.21951			-17.1563	120.838			-25.671	94.6636			-12.517	72.339			119.085	520	0			969.006	520	0			-114.9	214.823			-115.975	81.7979			-113.965	198.918			97.6149	520	0			206.909	520
408.045	536	2.77778		760.802	536	2.84553			-16.6752	116.723			-25.2572	91.4109			-11.8094	69.625			152.722	536	0			960.5	536	0			-114.425	213.808			-115.626	78.8873			-113.271	197.81			123.312	536	0			172.833	536
376.688	552	1.0101		457.367	552	1.21951			-16.0313	112.953			-24.5605	88.2677			-11.5266	66.201			148.025	552	0			1091.66	552	0			-113.725	212.198			-115.13	75.641			-112.815	196.667			124.36	552	0			149.696	552
260.703	568	1.26263		471.575	568	1.62602			-15.8103	109.367			-24.4396	85.2551			-11.1955	62.1881			146.873	568	0			1369.93	568	0			-113.542	210.064			-114.713	72.3472			-112.374	195.431			84.4019	568	0			285.591	568
226.909	584	1.76768		565.287	584	4.47154			-15.291	105.856			-23.8666	82.3416			-10.628	57.8011			119.266	584	0			1061.96	584	0			-113.042	207.623			-114.25	69.4095			-111.907	194.097			127.633	584	0			341.774	584
302.17	600	1.26263		426.894	600	3.25203			-14.7707	102.27			-23.4573	79.4976			-10.3579	53.4051			92.1408	600	0			1054	600	0			-112.66	205.145			-114.046	67.1488			-111.578	192.746			123.589	600	0			198.464	600
347.984	616	0.50505		583.585	616	1.21951			-14.4306	98.4988			-22.968	76.6299			-9.71302	49.2797			118.485	616	0			1006.23	616	0			-112.202	202.834			-113.479	65.5857			-110.949	191.39			174.35	616	0			285.585	616
405.257	632	0.75758		426.023	632	2.03252			-13.9158	94.4044			-22.2413	73.611			-9.41926	45.7129			180.722	632	0			1038.79	632	0			-111.614	200.787			-112.795	64.5202			-110.398	190.074			88.2965	632	0			109.563	632
283.691	648	1.51515		496.263	648	0.81301			-13.5402	89.8821			-22.0576	70.4296			-9.05637	42.932			142.421	648	0			1042.2	648	0			-111.139	198.99			-112.342	63.5281			-110.121	188.809			108.829	648	0			174.706	648
175.017	664	0.50505		370.763	664	0.4065			-12.8444	84.9226			-21.6792	67.0866			-8.61708	40.9098			126.188	664	0			979.411	664	0			-110.667	197.293			-111.631	62.1958			-109.566	187.544			88.3142	664	0			151.96	664
399.545	680	0.75758		816.235	680	1.62602			-12.5734	79.6648			-21.1472	63.7156			-8.03319	39.5217			188.568	680	0			947.091	680	0			-110.276	195.532			-111.477	60.2822			-109.077	186.252			48.9433	680	0			103.836	680
264.364	696	1.0101		418.293	696	1.21951			-12.3224	74.3777			-20.7552	60.4574			-7.34834	38.3873			164.052	696	0			844.568	696	0			-109.805	193.631			-110.911	57.7795			-108.547	184.928			48.0736	696	0			118.13	696
283.102	712	0.75758		423.797	712	0.81301			-12.0704	69.3757			-20.1158	57.4203			-6.87722	37.1458			126.972	712	0			872.994	712	0			-109.149	191.605			-110.648	54.9042			-108.129	183.582			118.314	712	0			100.725	712
244.384	728	0.50505		473.15	728	0.4065			-11.1591	64.9138			-19.9412	54.7377			-6.67531	35.5278			112.038	728	0			931.868	728	0			-108.843	189.64			-110.093	51.9446			-107.752	182.31			44.1167	728	0			119.617	728
310.04	744	0.50505		706.691	744	0			-10.9463	61.0597			-19.2509	52.4473			-5.965	33.4313			145.086	744	0			1325.19	744	0			-108.366	187.951			-109.618	49.1938			-107.044	181.208			117.561	744	0			135.886	744
276.89	760	0.25253		538.974	760	0.81301			-10.5425	57.7826			-18.938	50.5418			-5.65577	30.9651			163.821	760	0			1206.86	760	0			-108.012	186.8			-109.217	46.8093			-106.923	180.341			110.371	760	0			237.666	760
119.064	776	0.50505		602.328	776	0.4065			-9.93858	54.9057			-18.557	48.9675			-5.22649	28.2945			101.735	776	0			1102.03	776	0			-107.551	186.362			-108.69	44.7849			-106.226	179.727			127.46	776	0			167.35	776
335.217	792	0		335.167	792	2.03252			-9.57296	52.2006			-17.7284	47.5879			-4.70989	25.6582			181.161	792	0			1123.18	792	0			-106.84	186.585			-108.313	43.0778			-105.674	179.322			159.035	792	0			161.823	792
241.543	808	0.25253		386.09	808	0.4065			-8.9918	49.4935			-17.4928	46.3033			-4.43614	23.1681			52.6083	808	0			1148.21	808	0			-106.453	187.265			-107.734	41.5759			-105.225	178.979			82.5018	808	0			188.923	808
289.219	824	0		584.313	824	0.4065			-8.63345	46.6758			-16.9317	44.9757			-3.71309	20.8402			0	824	0			1202.6	824	0			-105.848	188.036			-107.243	40.1153			-104.889	178.571			51.0394	824	0			140.746	824
476.908	840	0		424.629	840	0			-8.11595	43.7437			-16.4542	43.5962			-3.28472	18.6459			0	840	0			1416.53	840	0			-105.383	188.584			-106.835	38.5862			-104.11	177.988			77.326	840	0			159.351	840
678.726	856	1.0101		710.342	856	0.81301			-7.64392	40.7516			-16.1013	42.2524			-2.98913	16.4778			0	856	0			1114.15	856	0			-104.878	188.711			-106.285	36.8216			-103.911	177.183			103.222	856	0			171.978	856
132.19	872	0.50505		316.17	872	0.81301			-7.36289	37.7492			-15.6357	41.0151			-2.4016	14.3155			0	872	0			1102.74	872	0			-104.385	188.375			-106.015	34.7779			-103.307	176.14			85.872	872	0			131.622	872
295.385	888	0.25253		413.245	888	0.4065			-6.94907	34.6941			-14.999	39.9686			-1.90501	12.1316			0	888	0			1024.7	888	0			-103.977	187.68			-105.284	32.411			-102.793	174.885			161.068	888	0			176.114	888
233.141	904	0.50505		599.458	904	0.81301			-6.18691	31.5491			-14.7271	38.9929			-1.48301	9.92441			0	904	0			1003.73	904	0			-103.62	186.771			-104.869	29.8037			-102.518	173.4			127.7	904	0			191.386	904
365.254	920	0		632.384	920	0			-5.774	28.1877			-14.1141	37.9758			-1.13103	7.84067			0	920	0			979.805	920	0			-102.951	185.745			-104.643	27.0946			-101.873	171.76			162.196	920	0			171.639	920
137.703	936	0		471.966	936	1.62602			-5.43021	24.5303			-13.5829	36.7336			-0.54896	5.96092			0	936	0			910.645	936	0			-102.519	184.646			-104.082	24.4519			-101.276	169.956			110.141	936	0			155.903	936
265.433	952	0.75758		582.34	952	1.21951			-5.06096	20.7044			-12.9945	35.1842			-0.11513	4.36292			0	952	0			1087.36	952	0			-101.954	183.475			-103.632	22.1006			-101.133	168.122			147.346	952	0			119.062	952
227.578	968	0		393.882	968	0			-4.49798	16.9198			-12.7544	33.4549			0.24321	3.07354			0	968	0			1033.18	968	0			-101.644	182.264			-103.172	20.1445			-100.52	166.358			97.6914	968	0			152.612	968
690.44	984	0.25253		425.804	984	0			-4.20967	13.5058			-12.356	31.7551			0.9408	2.02244			0	984	0			1221.95	984	0			-101.163	181.083			-102.657	18.6353			-100.112	164.727			107.62	984	0			110.802	984
210.498	1000	0		468.731	1000	0.4065			-3.70399	10.7388			-11.8594	30.324			1.21364	1.1568			0	1000	0			1034	1000	0			-100.595	180.007			-102.312	17.4572			-99.5575	163.183			108.473	1000	0			96.2674	1000
250.895				332.572					-3.23287	8.80146			-11.4411	29.327			1.93851	0.30729			0					1113.6					-100.11	179.098			-101.698	16.3899			-99.1564	161.655			237.128					83.1211
272.111				315.083					-2.78267	7.66827			-10.7262	28.6857			2.28594	-0.67689			0					1196.94					-99.7969	178.387			-101.222	15.2095			-98.507	160			250.257					201.932
356.664				538.007					-2.29337	7.14084			-10.356	28.2594			2.58607	-1.94531			0					997.264					-99.1245	177.86			-100.617	13.6963			-98.1368	158.201			123.795					125.428
229.396				455.954					-1.62762	6.86984			-9.75941	27.8359			3.34914	-3.60715			0					1001.49					-98.702	177.512			-100.199	11.8308			-97.633	156.352			102.236					185.898
323.567				687.162					-1.25927	6.58149			-9.37469	27.2341			3.81116	-5.71676			0					1057.4					-98.1762	177.335			-99.9842	9.76543			-97.4092	154.619			46.5702					184.472
228.274				445.33					-0.63536	6.07345			-8.91267	26.4076			4.21862	-8.20298			0					0					-97.7216	177.356			-99.3893	7.7242			-96.8081	153.177			78.1463					170.773
566.537				661.007					-0.26156	5.30912			-8.47975	25.3342			4.49328	-10.8808			0					0					-97.4038	177.541			-99.0465	5.96911			-96.3324	152.077			139.526					176.499
468.787				410.699					0.10497	4.36991			-7.87948	24.0701			4.88528	-13.556			0					0					-96.683	177.838			-98.398	4.66646			-95.7931	151.175			139.66					177.568
212.102				527.821					0.54244	3.34627			-7.50477	22.6559			5.62197	-16.0682			0					0					-96.2267	178.073			-97.996	3.86069			-95.2337	150.29			126.54					123.406
261.547				576.64					1.18454	2.21153			-6.84903	21.1941			5.86389	-18.3305			0					0					-95.7101	178.054			-97.5331	3.48358			-94.8099	149.26			100.924					222.574
332.108				681.759					1.64111	0.9362			-6.72443	19.849			6.49235	-20.4018			0					0					-95.2012	177.608			-96.9474	3.38092			-94.3551	148.057			133.584					364.136
438.65				396.034					2.2723	-0.54659			-6.00592	18.7817			6.91254	-22.3264			0					0					-94.8492	176.618			-96.5062	3.38441			-93.8949	146.821			55.4393					166.12
324.888				515.256					2.53969	-2.2447			-5.68214	18.1951			7.39457	-24.1661			0					0					-94.3396	175.01			-96.1043	3.25715			-93.5348	145.82			81.7086					137.65
437.277				421.505					2.95897	-4.02352			-5.20921	18.0828			7.71562	-25.9861			0					0					-93.7551	172.805			-95.4594	2.81708			-93.0018	145.279			149.209					101.826
534.986				686.488					3.37369	-5.66208			-4.52254	18.4421			8.31134	-27.7278			0					0					-93.3474	170.091			-94.9446	1.84405			-92.4625	145.346			116.167					162.817
452.049				524.327					3.91212	-7.01969			-4.11872	19.0768			8.84885	-29.4275			0					0					-92.9989	166.984			-94.5327	0.2412			-92.0378	145.943			114.316					152.15
891.941				455.957					4.56786	-8.03499			-3.58394	19.8285			9.15353	-31.0046			0					0					-92.4818	163.712			-94.1043	-1.89962			-91.4921	146.857			68.7986					145.671
279.958				1136.76					4.94166	-8.76702			-3.11464	20.4847			9.71469	-32.4168			0					0					-92.0554	160.47			-93.6213	-4.36092			-90.9336	147.763			255.128					276.534
383.952				405.592					5.19541	-9.32627			-2.61442	20.884			10.1794	-33.5384			0					0					-91.5966	157.517			-93.2785	-6.75474			-90.3097	148.333			71.1207					137.451
326.446				1138.23					5.96575	-9.83728			-2.10328	20.8562			10.6351	-34.1136			0					0					-91.1597	155.041			-92.8528	-8.76914			-89.9632	148.394			102.757					189.797
420.842				423.101					6.55693	-10.3133			-1.66763	20.3574			11.0989	-33.8657			0					0					-90.713	153.154			-92.349	-10.2157			-89.4575	147.928			106.545					186.279
603.712				645.904					6.77339	-10.794			-0.90093	19.3501			11.5892	-32.4356			0					0					-90.1875	151.872			-91.9588	-11.0982			-89.011	147.102			87.2644					194.733
379.623				593.634					7.21267	-11.2258			-0.85909	18.0045			11.9239	-29.6286			0					0					-89.7861	151.067			-91.1057	-11.6137			-88.6244	146.122			37.2769					180.746
718.307				424.35					7.79839	-11.5724			-0.13332	16.5081			12.7406	-25.4726			0					0					-89.1072	150.54			-90.8365	-11.9821			-88.116	145.145			239.069					153.071
208.486				415.525					8.38774	-11.8296			0.01766	15.1273			12.9352	-20.3161			0					0					-88.7963	150.093			-90.2999	-12.3777			-87.5831	144.24			95.0247					203.637
390.015				419.554					8.81611	-12.0197			0.74435	14.0971			13.982	-14.7786			0					0					-88.13	149.578			-89.8633	-12.8722			-87.0692	143.402			85.0964					172.591
356.055				481.692					9.25267	-12.2011			1.21637	13.4864			14.6032	-9.55588			0					0					-87.7434	148.905			-89.5213	-13.4412			-86.5344	142.562			69.1716					154.849
380.886				614.538					9.75471	-12.2877			1.67476	13.2824			15.1271	-5.19095			0					0					-87.3153	148.192			-88.8501	-14.0387			-86.2125	141.687			87.6479					294.627
422.962				534.12					10.1576	-12.2095			2.06038	13.3363			15.4918	-1.90455			0					0					-86.8492	147.525			-88.4054	-14.5851			-85.714	140.739			138.562					532.569
232.5				445.74					10.9007	-11.9131			2.69339	13.4595			15.8338	0.37529			0					0					-86.365	147.03			-87.8952	-15.0833			-85.2711	139.714			63.3356					125.196
358.783				590.657					11.1653	-11.3261			3.19089	13.4384			16.4904	1.89684			0					0					-85.8166	146.735			-87.4404	-15.4951			-84.6017	138.581			154.294					102.35
328.804				401.125					11.5346	-10.4517			3.8048	13.1355			16.9397	2.88768			0					0					-85.3236	146.576			-87.1594	-15.8183			-84.1852	137.311			125.675					100.516
415.9				354.792					12.2513	-9.48574			4.02762	12.5385			17.4236	3.42316			0					0					-84.8792	146.493			-86.4236	-16.0985			-83.7832	135.938			78.9092					172.921
160.206				637.145					12.8761	-8.65507			4.56331	11.6567			18.1348	3.54936			0					0					-84.3442	146.412			-85.9234	-16.3129			-83.3775	134.575			52.385					174.584
356.156				235.776					13.4354	-8.20548			5.14357	10.6831			18.5232	3.26732			0					0					-83.793	146.341			-85.525	-16.5624			-82.8437	133.347			353.107					162.686
259.249				430.543					13.4927	-8.29056			5.4719	9.74288			18.8087	2.61098			0					0					-83.5771	146.277			-85.0275	-16.8646			-82.3735	132.358			112.07					151.336
153.214				561.9					14.2431	-8.97218			6.03397	9.04795			19.3717	1.76766			0					0					-82.8089	146.247			-84.631	-17.1471			-81.8423	131.687			99.2363					209.857
159.37				494.611					14.796	-10.1995			6.45052	8.68859			19.8674	0.91424			0					0					-82.4952	146.235			-83.9416	-17.4251			-81.454	131.31			81.9778					233.219
218.608				624.746					15.1707	-11.785			7.00076	8.69925			20.2958	0.18496			0					0					-81.885	146.17			-83.686	-17.5942			-80.9565	131.138			140.078					169.405
198.992				792.411					15.5282	-13.4959			7.35001	9.00016			20.8633	-0.35953			0					0					-81.3572	145.98			-83.0594	-17.6398			-80.2835	131.051			69.3088					203.463
222.659				400.5					16.1212	-14.9772			8.06123	9.45025			21.4062	-0.7199			0					0					-81.0102	145.624			-82.6319	-17.5465			-79.9497	130.885			41.1115					168.386
390.523				279.024					16.4259	-15.9732			8.55509	9.84203			21.5026	-0.89796			0					0					-80.5089	145.069			-82.1963	-17.3582			-79.544	130.517			77.3181					198.016
281.666				1021.23					16.9706	-16.3272			8.96618	10.0629			22.5195	-1.00851			0					0					-79.9619	144.285			-81.4259	-17.2155			-78.8319	129.816			67.6554					144.921
533.347				446.572					17.4308	-16.08			9.51915	10.0004			22.7323	-1.12172			0					0					-79.5066	143.217			-81.1894	-17.1869			-78.4035	128.698			80.7114					171.519
368.438				689.209					18.0502	-15.4252			9.84111	9.69023			23.2298	-1.32046			0					0					-79.0148	141.813			-80.8184	-17.3395			-78.0907	127.14			139.632					158.689
400.127				849.565					18.6232	-14.6776			10.5078	9.15774			23.7482	-1.68566			0					0					-78.5996	140.026			-79.8325	-17.6918			-77.474	125.216			88.1349					122.533
278.866				957.927					19.0579	-14.1769			10.8516	8.47708			24.3084	-2.28927			0					0					-78.0226	137.78			-79.7652	-18.1688			-77.1093	123.045			75.2599					102.744
561.058				376.854					19.5754	-14.0308			11.3618	7.72305			24.735	-3.08401			0					0					-77.6094	135.2			-79.2131	-18.6745			-76.6191	120.821			107.5					142.241
253.817				357.286					19.932	-14.2726			11.923	6.94539			25.1061	-3.97338			0					0					-77.2366	132.435			-78.8803	-19.0622			-76.1516	118.728			43.4903					321.995
452.481				535.265					20.4767	-14.8165			12.4032	6.26624			25.6172	-4.88068			0					0					-76.7012	129.822			-78.2199	-19.2816			-75.7678	116.918			105.401					386.341
577.29				460.73					20.9042	-15.5333			12.6778	5.8075			26.2802	-5.68493			0					0					-76.3085	127.616			-77.596	-19.3671			-75.2594	115.498			60.8227					285.305
336.445				446.938					21.5263	-16.2964			13.2845	5.71771			26.3894	-6.32237			0					0					-75.9234	125.965			-77.3159	-19.3524			-74.7601	114.487			83.7989					399.478
255.435				556.813					21.8364	-17.0388			13.6883	6.04746			27.1133	-6.87214			0					0					-75.4579	124.864			-76.7693	-19.2586			-74.259	113.762			323.192					182.745
449.458				378.87					22.4576	-17.7586			14.4404	6.71236			27.6654	-7.30426			0					0					-74.7525	124.093			-76.2218	-18.8937			-73.7815	113.248			68.945					238.417
295.953				600.24					22.796	-18.4544			14.6123	7.49996			28.1711	-7.64571			0					0					-74.1665	123.408			-75.7807	-18.0566			-73.2485	112.8			171.406					198.15
285.994				780.85					23.2471	-19.1895			15.3472	8.16347			28.4294	-7.80699			0					0					-73.8471	122.609			-75.3623	-16.5083			-72.8401	112.328			191.487					225.226
483.493				622.311					24.0429	-19.9952			15.9884	8.50097			28.9714	-7.61112			0					0					-73.4243	121.664			-74.9922	-14.1044			-72.3281	111.797			100.482					190.676
529.602				454.473					24.3321	-20.9536			16.3149	8.41958			29.5917	-6.85259			0					0					-73.1271	120.722			-74.3692	-11.0464			-71.8133	111.226			122.953					183.668
534.725				503.271					24.6795	-22.0111			16.7014	8.01364			29.8454	-5.36651			0					0					-72.285	119.932			-73.4533	-7.67621			-71.3731	110.648			93.9551					264.748
605.295				442.604					25.2461	-23.1605			17.1571	7.48609			30.513	-3.18156			0					0					-71.9729	119.395			-73.0749	-4.48189			-70.983	110.128			170.814					157.851
492.639				410.721					25.73	-24.2754			17.6764	7.07757			31.1233	-0.42681			0					0					-71.5652	119.188			-72.4901	-1.82197			-70.2863	109.659			117.963					232.879
289.929				959.415					26.3494	-25.2675			18.2112	6.92548			31.5653	2.66035			0					0					-70.9076	119.274			-72.2291	0.11576			-70.0253	109.218			167.781					198.279
504.153				574.445					26.5394	-25.9768			18.7432	7.04205			32.1801	5.74876			0					0					-70.5702	119.571			-71.5852	1.30036			-69.3832	108.74			107.171					231.364
673.934				878.006					27.1788	-26.3273			18.9997	7.33988			32.7185	8.56335			0					0					-69.926	119.918			-71.2332	1.85022			-68.9812	108.151			109.887					178.596
334.379				753.453					27.5499	-26.2599			19.7792	7.66969			33.1906	10.8884			0					0					-69.5598	120.114			-70.4983	1.88619			-68.3645	107.38			117.441					197.625
715.155				531.072					28.2457	-25.8286			20.2539	7.81345			33.6844	12.555			0					0					-69.0545	119.934			-70.0481	1.60829			-68.0471	106.392			94.2937					241.459
252.557				942.554					28.5158	-25.1785			20.6814	7.72673			34.1564	13.4385			0					0					-68.3387	119.169			-69.7707	1.19663			-67.5032	105.159			101.686					337.632
242.979				355.521					29.3288	-24.4349			21.1716	7.4059			34.9086	13.559			0					0					-67.9439	117.797			-69.246	0.88778			-67.1121	103.709			90.9817					236.433
396.937				320.663					29.5844	-23.7602			21.5463	7.00973			35.1396	13.067			0					0					-67.6621	115.921			-68.823	0.85475			-66.4819	102.108			83.8446					187.477
360.448				682.784					30.1883	-23.3289			22.0802	6.68641			35.6453	12.2118			0					0					-67.1586	113.885			-68.2019	1.16983			-66.0953	100.383			76.5685					260.221
450.503				592.618					30.5449	-23.2092			22.6604	6.65394			35.9818	11.3132			0					0					-66.7554	112.003			-67.7498	1.73115			-65.6888	98.5913			119.02					113.211
630.319				873.701					31.1706	-23.4784			22.8924	7.00588			36.5221	10.6307			0					0					-66.2103	110.546			-67.2278	2.34879			-65.2459	96.8054			134.475					182.483
189.881				901.108					31.6826	-24.1202			23.6336	7.7266			36.9486	10.2201			0					0					-65.7034	109.686			-66.5548	2.78577			-64.6911	95.0421			66.5243					294.452
209.03				789.833					32.1092	-25.1274			24.0938	8.72354			37.6407	10.0019			0					0					-65.2451	109.331			-66.3192	2.92888			-64.1672	93.3763			103.134					307.631
251.387				888.981					32.543	-26.3468			24.4758	9.78835			38.1455	9.77554			0					0					-64.7562	109.362			-65.6389	2.71589			-63.717	91.884			391.998					189.871
349.036				433.965					32.9214	-27.61			25.3053	10.7305			38.5229	9.37936			0					0					-64.3173	109.511			-65.4134	2.26307			-63.4151	90.6844			0					324.898
235.743				386.847					33.4425	-28.6995			25.4835	11.3995			39.0441	8.75289			0					0					-63.6521	109.531			-64.7676	1.68885			-62.9439	89.845			0					305.225
535.674				581.846					34.0873	-29.5251			26.2366	11.7363			39.407	7.9508			0					0					-63.1811	109.301			-64.2237	1.09648			-62.2463	89.3451			0					244.482
339.932				443.273					34.3165	-30.0524			26.3785	11.7812			39.959	7.18933			0					0					-62.7116	108.77			-63.9209	0.61417			-61.9144	89.0786			0					317.584
373.961				691.88					34.9159	-30.4037			27.1452	11.5368			40.4111	6.60172			0					0					-62.4157	108.053			-63.3543	0.294			-61.2968	88.863			0					326.957
249.602				409.129					35.4252	-30.7123			27.5735	11.0718			40.9431	6.36628			0					0					-61.9082	107.304			-62.8831	0.21774			-60.8312	88.4799			0					178.123
468.123				509.609					36.0464	-31.1405			27.9173	10.4163			41.316	6.51542			0					0					-61.2302	106.703			-62.3756	0.37843			-60.3673	87.7939			0					222.134
514.776				263.504					36.4402	-31.6785			28.5094	9.55942			41.8908	7.03228			0					0					-60.97	106.336			-61.8409	0.75465			-59.928	86.7727			0					254.201
568.883				444.194					36.8231	-32.2168			29.1351	8.63627			42.3546	7.80337			0					0					-60.3293	106.189			-61.5053	1.29548			-59.426	85.4709			0					76.6313
579				933.443					37.2478	-32.5894			29.4071	7.77352			42.9822	8.64456			0					0					-59.9089	106.132			-60.8277	1.86751			-58.9867	83.9906			0					129.779
279.781				409.852					37.7599	-32.6417			29.7518	7.11465			43.4551	9.39761			0					0					-59.4224	105.999			-60.3384	2.34881			-58.4456	82.4682			0					288.241
522.273				953.372					38.3683	-32.3817			30.2966	6.8386			43.8326	9.87243			0					0					-58.8049	105.617			-59.9164	2.62054			-58.1791	80.9806			0					192.844
319.595				907.169					38.8049	-31.8859			31.0514	6.94131			44.511	10.0067			0					0					-58.4665	104.849			-59.3243	2.65806			-57.5042	79.609			0					180.93
289.664				450.641					39.366	-31.3525			31.2715	7.39627			44.7985	9.84124			0					0					-57.7942	103.656			-58.9896	2.48009			-57.0195	78.4284			0					191.656
194.675				229.745					39.9126	-30.9882			31.9564	8.03057			45.4715	9.47505			0					0					-57.5934	102.1			-58.3721	2.15389			-56.6775	77.4363			0					240.058
300.473				350.042					40.2201	-30.8813			32.3984	8.67218			45.7843	9.08475			0					0					-57.0133	100.274			-58.0346	1.80665			-56.2055	76.6616			0					164.284
590.883				1009.82					40.814	-30.9838			32.7458	9.19028			46.2154	8.86847			0					0					-56.5338	98.2826			-57.4944	1.515			-55.6098	76.0889			0					246.892
405.952				1445.82					41.3278	-31.2			33.5316	9.48123			46.8557	8.91945			0					0					-56.0377	96.3151			-56.9887	1.32294			-55.1241	75.6952			0					270.916
513.685				1000.91					41.7234	-31.3152			33.9382	9.56668			47.1741	9.30067			0					0					-55.6476	94.4527			-56.4039	1.27445			-54.7339	75.3931			0					221.519
446.597				440.583					42.2491	-31.1355			34.2947	9.54902			47.9344	9.91928			0					0					-55.1882	92.8433			-56.1383	1.32212			-54.1691	75.097			0					204.547
267.175				537.123					42.5538	-30.3971			34.7694	9.53532			48.2345	10.6103			0					0					-54.5766	91.597			-55.5544	1.44761			-53.7708	74.6596			0					250.413
433.056				943.823					43.3815	-28.9248			35.226	9.6248			48.6984	11.1534			0					0					-54.3085	90.7841			-54.9178	1.58853			-53.1678	73.9633			0					240.127
479.151				265.007					43.688	-26.5853			35.7954	9.79556			49.4951	11.3389			0					0					-53.7935	90.368			-54.5667	1.68966			-52.6375	72.9126			0					194.587
376.503				581.723					44.1363	-23.4274			36.4802	9.99904			49.7952	11.0646			0					0					-53.176	90.1802			-54.0929	1.80227			-52.2692	71.5267			0					109.66
208.452				624.674					44.6457	-19.66			36.7258	10.1025			50.2591	10.3285			0					0					-52.6052	90.0331			-53.4708	1.93266			-51.829	69.9446			0					240.698
511.139				248.877					45.5742	-15.6462			37.3124	10.0261			50.802	9.35235			0					0					-52.32	89.6427			-53.0861	2.23605			-51.4197	68.3203			0					0
509.946				319.907					45.8853	-11.836			37.7571	9.8351			51.0403	8.37482			0					0					-51.633	88.888			-52.7505	2.73706			-50.8477	66.8441			0					0
280.698				1129.66					46.5829	-8.59298			38.301	9.61514			51.6579	7.6599			0					0					-51.2482	87.7726			-52.0747	3.45326			-50.472	65.6101			0					0
222.58				133.801					46.8275	-6.14242			38.6994	9.54089			52.1344	7.38317			0					0					-50.8483	86.4888			-51.5699	4.29146			-49.8772	64.6422			0					0
463.466				928.407					47.5397	-4.5834			39.0823	9.71537			52.5928	7.54441			0					0					-50.3871	85.2693			-50.9733	5.10537			-49.4397	63.8742			0					0
643.215				591.62					47.8971	-3.84956			39.7662	10.1213			53.1121	8.07166			0					0					-49.8179	84.3761			-50.5658	5.74321			-48.9941	63.2135			0					0
647.343				409.068					48.4528	-3.87267			40.1673	10.6283			53.7588	8.77251			0					0					-49.5001	83.9819			-50.1893	6.13107			-48.4138	62.5777			0					0
414.263				590.014					48.9403	-4.49182			40.7448	10.9724			54.1608	9.49077			0					0					-48.9696	84.0306			-49.439	6.31033			-48.0473	61.9152			0					0
317.106				853.563					49.425	-5.53517			41.4124	11.01			54.5473	10.177			0					0					-48.2912	84.3192			-49.2753	6.35753			-47.4616	61.1906			0					0
131.855				1286.54					49.8161	-6.74455			41.5597	10.6233			55.2213	10.7943			0					0					-47.8691	84.6291			-48.4795	6.39517			-47.1005	60.3696			0					0
157.007				1129.69					50.2654	-7.87765			42.2564	9.86605			55.5851	11.3906			0					0					-47.3464	84.6773			-48.263	6.53758			-46.4693	59.4717			0					0
315.059				459.02					50.7493	-8.59068			42.6511	8.95618			56.1262	12.0143			0					0					-46.9328	84.3447			-47.7073	6.77332			-46.1292	58.4898			0					0
280.922				558.081					51.255	-8.72147			43.0149	8.17947			56.5619	12.6369			0					0					-46.3493	83.6677			-47.1089	6.98508			-45.6071	57.4626			0					0
392.176				528.321					51.6388	-8.20198			43.5179	7.77796			57.1285	13.2496			0					0					-46.065	82.7025			-46.6641	7.03807			-45.0778	56.3944			0					0
462.326				454.892					52.2863	-7.15511			44.0654	7.88962			57.6978	13.8498			0					0					-45.5193	81.5971			-46.0602	6.79922			-44.7422	55.2929			0					0
691.22				440.542					52.862	-5.77454			44.6448	8.47719			58.0971	14.4293			0					0					-44.942	80.4623			-45.6437	6.24618			-44.1574	54.1474			0					0
354.533				600.88					53.2477	-4.34149			44.7921	9.37427			58.5964	15.0628			0					0					-44.5056	79.3542			-45.2153	5.4286			-43.629	52.948			0					0
390.078				165.374					53.7779	-3.09968			45.8835	10.3286			59.0802	15.875			0					0					-44.184	78.3009			-44.8688	4.51034			-43.2143	51.721			0					0
419.404				372.583					54.43	-2.2561			46.0881	11.077			59.4595	16.884			0					0					-43.3898	77.3147			-44.3522	3.64504			-42.855	50.4577			0					0
366.28				431.264					54.6774	-1.9692			46.5829	11.4945			60.1061	17.9949			0					0					-43.3171	76.4106			-43.6892	2.86073			-42.2338	49.2301			0					0
357.64				549.4					55.3186	-2.30892			47.0249	11.469			60.6637	18.9315			0					0					-42.5931	75.5432			-43.2563	2.23214			-41.8191	48.0713			0					0
366.731				792.829					55.8725	-3.22741			47.6279	11.0452			61.123	19.3614			0					0					-41.9735	74.6305			-42.8615	1.71136			-41.3234	47.0742			0					0
357.907				402.623					56.2071	-4.54417			47.9853	10.3232			61.6568	18.9826			0					0					-41.7868	73.6329			-42.394	1.35873			-40.8259	46.2615			0					0
607.862				1064.74					56.681	-6.00993			48.5128	9.40732			62.3462	17.7562			0					0					-41.1698	72.6328			-41.8574	1.25014			-40.4403	45.6371			0					0
240.383				652.342					57.0548	-7.32571			49.0412	8.42289			62.52	15.9053			0					0					-40.5605	71.7505			-41.3208	1.44464			-39.9637	45.1936			0					0
484.352				0					57.515	-8.26776			49.3632	7.47204			62.8028	13.8907			0					0					-40.3292	71.2789			-41.0789	1.9908			-39.3753	44.8004			0					0
321.519				0					58.098	-8.7436			49.9344	6.65906			63.3321	12.2061			0					0					-39.8743	71.4094			-40.274	2.80327			-38.7787	44.3494			0					0
462.57				0					58.6983	-8.82231			50.3154	5.97384			63.7478	11.209			0					0					-39.367	72.2273			-39.8575	3.76292			-38.4722	43.7249			0					0
515.299				0					59.073	-8.66489			50.9876	5.46891			64.5227	10.9679			0					0					-38.7393	73.5466			-39.43	4.68481			-37.961	42.9035			0					0
219.459				0					59.5277	-8.42994			51.4114	5.04124			64.7946	11.2295			0					0					-38.0576	75.1091			-38.7315	5.39346			-37.5163	41.9319			0					0
297.269				0					60.0752	-8.26706			51.7634	4.69433			65.5331	11.6738			0					0					-37.7227	76.4648			-38.4432	5.82199			-36.9187	40.954			0					0
197.21				0					60.701	-8.21811			52.3727	4.43337			65.8205	11.9335			0					0					-37.2202	77.3269			-37.8293	5.91676			-36.5267	40.1199			0					0
645.017				0					60.9638	-8.24588			52.8648	4.33963			66.5308	11.791			0					0					-36.644	77.5533			-37.39	5.75677			-36.2203	39.5423			0					0
536.826				0					61.555	-8.29462			53.3341	4.46615			66.9246	11.2014			0					0					-36.3666	77.0888			-36.9716	5.43965			-35.5454	39.2468			0					0
469.401				0					61.9715	-8.29947			53.6833	4.87148			67.2621	10.3075			0					0					-35.5848	76.0577			-36.3696	5.06431			-35.0816	39.145			0					0
640.05				0					62.4545	-8.27863			54.2045	5.49619			67.6932	9.27785			0					0					-35.3582	74.6414			-36.0722	4.72811			-34.4777	39.1082			0					0
478.44				0					63.0456	-8.29044			54.8857	6.19397			68.3162	8.28332			0					0					-34.8511	73.0017			-35.4746	4.3668			-34.122	38.982			0					0
813.803				0					63.5695	-8.43904			55.5159	6.80625			68.8737	7.4777			0					0					-34.439	71.2899			-34.9216	3.96412			-33.6054	38.7139			0					0
252.774				0					63.9715	-8.73543			55.6696	7.15672			69.0656	6.89332			0					0					-33.8323	69.593			-34.5242	3.40543			-33.1061	38.2789			0					0
446.278				0					64.4754	-9.1851			56.2927	7.13116			69.7741	6.52934			0					0					-33.4307	67.9627			-33.8785	2.61815			-32.6814	37.7063			0					0
452.308				0					64.8928	-9.67723			56.7883	6.68861			70.1543	6.26252			0					0					-32.9437	66.4088			-33.6865	1.64404			-32.1694	37.0353			0					0
210.631				0					65.3639	-10.1217			57.3113	5.84295			70.7172	5.98116			0					0					-32.47	64.9193			-33.0281	0.52883			-31.6746	36.2629			0					0
390.82				0					65.8915	-10.3986			57.7033	4.68366			71.2447	5.54789			0					0					-32.0584	63.4272			-32.566	-0.56828			-31.2062	35.3607			0					0
246.558				0					66.4399	-10.497			58.3263	3.39175			71.7486	4.96871			0					0					-31.5012	61.9213			-32.2241	-1.48992			-30.7451	34.2713			0					0
306.133				0					66.8537	-10.4273			58.5646	2.18118			72.1442	4.35687			0					0					-31.0523	60.327			-31.5829	-2.10987			-30.1357	33.0101			0					0
436.624				0					67.4067	-10.1966			58.9875	1.29589			72.5007	3.91352			0					0					-30.5401	58.7168			-31.3028	-2.31635			-29.8492	31.64			0					0
510.309				0					67.7305	-9.85468			59.5768	0.84745			73.0519	3.84519			0					0					-30.0875	57.1258			-30.6325	-2.12129			-29.3399	30.2984			0					0
747.065				0					68.4371	-9.47882			60.2026	0.89704			73.5485	4.25967			0					0					-29.7127	55.6612			-30.225	-1.597			-28.8379	29.1054			0					0
328.097				0					68.8027	-9.1327			60.5391	1.38381			74.0487	5.13957			0					0					-29.2071	54.4428			-29.7093	-0.91607			-28.4532	28.1766			0					0
367.187				0					69.4467	-8.93274			61.0711	2.12914			74.6599	6.22863			0					0					-28.7918	53.5401			-29.079	-0.29103			-27.8338	27.558			0					0
306.3				0					69.7623	-8.96356			61.6832	3.03668			75.1483	7.30427			0					0					-28.0458	52.971			-28.6789	0.16202			-27.4336	27.2565			0					0
322.873				0					70.3443	-9.24304			62.0643	3.98377			75.6394	8.08075			0					0					-27.7595	52.7322			-28.1523	0.3255			-26.9007	27.2567			0					0
494.674				0					70.8727	-9.76621			62.63	4.93741			76.1169	8.3966			0					0					-27.2662	52.7493			-27.6712	0.27032			-26.4041	27.5252			0					0
493.033				0					71.152	-10.4529			62.9911	5.84884			76.6362	8.26666			0					0					-26.8651	52.9036			-27.2855	0.10937			-25.9993	28.0222			0					0
318.955				0					71.8068	-11.1821			63.7705	6.70126			77.1073	7.8183			0					0					-26.1951	53.0432			-26.7944	-0.03594			-25.46	28.6227			0					0
323.559				0					72.2925	-11.882			63.9888	7.44627			77.5503	7.28356			0					0					-25.6558	52.9486			-26.2723	-0.07429			-24.9043	29.2246			0					0
958.887				0					72.5771	-12.3971			64.6263	8.04615			77.874	6.89046			0					0					-25.2682	52.4839			-25.6803	-0.00662			-24.3886	29.6771			0					0
865.058				0					73.2247	-12.6856			65.132	8.48031			78.5161	6.76045			0					0					-24.6762	51.638			-25.3019	0.15859			-23.8529	29.9265			0					0
714.146				0					73.6995	-12.6797			65.5158	8.73214			78.8763	6.91985			0					0					-24.4014	50.4998			-24.849	0.31883			-23.501	29.9837			0					0
470.362				0					74.0787	-12.4223			66.187	8.77847			79.6667	7.30641			0					0					-23.9649	49.2033			-24.1723	0.45487			-23.0207	29.9012			0					0
380.116				0					74.7327	-11.9737			66.4663	8.68367			80.0714	7.82043			0					0					-23.3277	47.8314			-23.8422	0.56679			-22.5296	29.7548			0					0
900.91				0					75.1292	-11.4662			67.0683	8.50257			80.3524	8.35261			0					0					-22.9015	46.489			-23.3074	0.65241			-22.033	29.6002			0					0
336.618				0					75.6758	-11.0101			67.5749	8.30602			80.98	8.83443			0					0					-22.3737	45.2154			-22.8681	0.75538			-21.3691	29.407			0					0
1146.57				0					76.2815	-10.6366			67.9451	8.17659			81.4147	9.20569			0					0					-21.8246	44.1258			-22.2915	0.85152			-21.0562	29.1435			0					0
771.084				0					76.478	-10.4538			68.4226	8.094			82.0232	9.40786			0					0					-21.5815	43.4113			-21.9177	0.90564			-20.5678	28.8256			0					0
660.052				0					77.1965	-10.4619			68.9837	8.06259			82.6753	9.39314			0					0					-21.1976	43.2356			-21.3329	0.83084			-20.1222	28.5352			0					0
571.847				0					77.613	-10.643			69.6004	7.92971			82.8481	9.17437			0					0					-20.5714	43.5948			-20.6853	0.58807			-19.5192	28.3673			0					0
107.083				0					78.1314	-11.0114			69.9842	7.63991			83.2564	8.77661			0					0					-19.8753	44.2422			-20.5298	0.16184			-19.0781	28.4026			0					0
376.233				0					78.6226	-11.4948			70.3189	7.1552			83.9386	8.26351			0					0					-19.3964	44.8183			-19.8832	-0.44562			-18.6624	28.661			0					0
417.634				0					79.05	-12.0364			71.0701	6.48699			84.5124	7.65225			0					0					-18.9886	44.9692			-19.3993	-1.14485			-18.2923	29.0476			0					0
248.676				0					79.4802	-12.5867			71.3639	5.7736			84.8599	6.98036			0					0					-18.4496	44.4763			-19.0237	-1.85224			-17.4201	29.3978			0					0
479.229				0					79.8849	-13.1036			71.8059	5.09532			85.2892	6.24365			0					0					-17.9851	43.3372			-18.3734	-2.52767			-16.9899	29.5201			0					0
235.959				0					80.738	-13.6452			72.3598	4.57009			85.8139	5.47471			0					0					-17.7062	41.6985			-18.0642	-3.07863			-16.6989	29.291			0					0
204.524				0					80.9772	-14.2632			72.7781	4.24405			86.3223	4.7235			0					0					-17.1003	39.7678			-17.4648	-3.4865			-16.1968	28.6763			0					0
189.646				0					81.3865	-14.9911			73.4575	4.12524			86.7452	4.03345			0					0					-16.5884	37.7803			-17.1265	-3.63593			-15.6075	27.741			0					0
215.762				0					81.9913	-15.8484			73.7067	4.1778			87.2728	3.4061			0					0					-16.1245	35.9021			-16.4589	-3.51635			-15.19	26.5895			0					0
185.755				0					82.4324	-16.7198			74.3307	4.37682			87.7639	2.9023			0					0					-15.7406	34.285			-16.0269	-3.13175			-14.7434	25.3925			0					0
196.113				0					82.9508	-17.4902			74.82	4.69217			88.1686	2.53232			0					0					-15.3965	33.0989			-15.7677	-2.58854			-14.2851	24.3303			0					0
478.94				0					83.2883	-18.0532			75.2174	5.08614			88.7343	2.27123			0					0					-14.7287	32.4386			-14.9373	-2.09605			-13.7921	23.5298			0					0
395.421				0					83.7903	-18.374			75.8713	5.432			89.2182	2.11793			0					0					-14.2084	32.2455			-14.4162	-1.81639			-13.3219	23.0323			0					0
430.153				0					84.3742	-18.5125			76.2642	5.75631			89.5392	2.01193			0					0					-13.8441	32.3783			-14.0469	-1.87663			-12.8954	22.8103			0					0
557.822				0					84.8471	-18.6641			76.819	6.0144			90.2423	1.83108			0					0					-13.2764	32.6537			-13.4276	-2.23536			-12.235	22.8213			0					0
314.706				0					85.4538	-18.9934			77.2092	6.17883			90.727	1.48195			0					0					-12.753	32.8708			-13.363	-2.74076			-11.8549	22.9526			0					0
213.164				0					85.8349	-19.5873			77.7685	6.20748			91.3209	1.01688			0					0					-12.1826	32.9036			-12.6117	-3.22918			-11.2073	23.1175			0					0
299.004				0					86.2569	-20.4807			78.1696	5.97657			91.4673	0.61477			0					0					-11.7944	32.7535			-12.1643	-3.52727			-10.9781	23.2908			0					0
381.118				0					86.7534	-21.5593			78.7653	5.43889			91.9776	0.49299			0					0					-11.4891	32.4232			-11.5267	-3.63258			-10.4133	23.4572			0					0
280.191				0					87.2518	-22.6474			79.3165	4.53431			92.6233	0.85152			0					0					-10.8469	31.9181			-11.2329	-3.55756			-9.80852	23.6448			0					0
740.512				0					87.6866	-23.5511			79.9331	3.38101			92.9389	1.71592			0					0					-10.2243	31.2184			-10.7282	-3.39243			-9.27192	23.8441			0					0
191.616				0					88.1377	-24.1554			79.8167	2.23589			93.5747	2.88868			0					0					-9.89687	30.2591			-10.1061	-3.29419			-8.99543	24.0652			0					0
153.964				0					88.7534	-24.46			80.4943	1.37208			94.2631	4.07397			0					0					-9.38792	29.0352			-9.78502	-3.38612			-8.42427	24.2747			0					0
346.808				0					88.9599	-24.5686			81.0773	0.97413			94.7561	5.01106			0					0					-8.84827	27.605			-9.04833	-3.79187			-7.87039	24.4336			0					0
522.283				0					89.7666	-24.6541			81.6403	1.03377			95.0217	5.46939			0					0					-8.58673	26.0657			-8.68272	-4.55483			-7.44111	24.4435			0					0
354.76				0					90.265	-24.9515			82.1614	1.43878			95.5637	5.49687			0					0					-8.06563	24.4928			-8.29891	-5.59017			-6.8845	24.2846			0					0
386.657									90.6288	-25.5883			82.4752	1.99188			96.1422	5.19026													-7.39685	22.948			-7.68409	-6.73873			-6.31242	23.923
297.096									91.1481	-26.6251			83.1664	2.56873			96.4878	4.72147													-7.02307	21.4188			-7.43489	-7.71123			-6.09415	23.4371
908.933									91.4755	-27.9639			83.602	3.06817			97.0262	4.17095													-6.64252	19.8987			-6.93376	-8.33729			-5.48478	22.8752
231.419									92.1204	-29.4315			83.9486	3.44001			97.5637	3.64397													-6.08557	18.3315			-6.37078	-8.49542			-5.07733	22.3066
260.069									92.5151	-30.7824			84.5243	3.67121			97.9621	3.21089													-5.57733	16.7613			-5.7878	-8.26146			-4.44341	21.7519
217.411									92.9235	-31.8556			85.19	3.70737			98.4159	2.87028													-5.19141	15.2826			-5.34214	-7.79642			-4.0205	21.2033
350.913									93.37	-32.5998			85.5893	3.48141			99.1353	2.66048													-4.73522	13.9527			-4.91013	-7.24685			-3.49754	20.6538
660.284									93.9676	-33.0931			85.9513	3.04459			99.2281	2.57784													-4.12143	12.8673			-4.25257	-6.82526			-3.19286	20.0653
202.333									94.4223	-33.534			86.4851	2.50895			99.9684	2.57068													-3.82219	12.1334			-3.93152	-6.56838			-2.59896	19.4247
364.723									95.068	-34.0909			86.9281	2.02795			100.509	2.54009													-3.23589	11.7872			-3.39583	-6.54647			-2.1051	18.6856
356.118									95.4409	-34.8868			87.4947	1.69923			101.007	2.41041													-2.84856	11.7549			-2.76009	-6.72667			-1.56759	17.8275
403.758									95.9084	-35.8828			87.9139	1.59718			101.285	2.18826													-2.17632	11.9065			-2.50179	-7.02556			-1.11011	16.8638
288.426									96.1749	-36.9789			88.2878	1.76889			101.917	1.81196													-1.81384	11.9814			-1.93427	-7.40472			-0.66082	15.8746
619.209									96.8343	-38.0413			89.1327	2.19863			102.426	1.36995													-1.26841	11.7502			-1.4586	-7.79898			-0.29794	15.0162
626.739									97.35	-38.9496			89.34	2.8431			102.757	0.93606													-0.62544	11.0832			-1.01659	-8.15736			0.09406	14.3764
272.757									97.8547	-39.6926			89.8648	3.6128			103.372	0.58803													-0.27381	9.99307			-0.32901	-8.44775			0.9217	14.0193
331.134									98.1258	-40.3445			90.3578	4.44655			103.857	0.38835													0.03756	8.62298			-0.12619	-8.63984			1.24184	13.8836
589.631									98.7751	-41.0107			90.9635	5.23414			104.254	0.4335													0.49491	7.2026			0.58776	-8.72898			1.69932	13.8823
225.27									99.2881	-41.7927			91.6383	5.85887			104.71	0.6582													1.1983	5.98916			0.82332	-8.69257			2.21773	13.8922
212.914									99.651	-42.7722			91.7829	6.31632			105.203	1.03513													1.58363	5.17291			1.47725	-8.61829			2.80526	13.9321
193.313									100.38	-43.9233			92.345	6.57871			106.085	1.42753													2.06308	4.90042			2.07751	-8.59344			3.09721	14.0039
254.993									100.573	-45.1453			92.8971	6.68399			106.109	1.73012													2.37575	5.17756			2.45677	-8.68226			3.69566	14.1717
246.974									101.017	-46.281			93.4018	6.7183			106.809	1.82477													2.9826	5.91653			2.91971	-8.98544			4.22771	14.4834
261.858									101.565	-47.1925			93.9876	6.64291			107.297	1.7277													3.60471	6.87765			3.45267	-9.43141			4.58241	14.9544
221.095									102.132	-47.7938			94.2195	6.51157			107.757	1.54155													4.13456	7.74691			3.87104	-9.91422			5.1654	15.5377
231.69									102.549	-48.0796			94.8079	6.24301			108.167	1.31717													4.60825	8.24239			4.3658	-10.3189			5.71473	16.1139
863.046									103.071	-48.0869			95.3855	5.82325			108.739	1.17772													5.07007	8.21067			4.79599	-10.5212			6.21132	16.6073
872.714									103.545	-47.9107			95.762	5.20569			109.078	1.17264													5.45403	7.66154			5.37534	-10.5595			6.50872	16.8689
564.008									104.027	-47.5759			96.5151	4.44284			109.767	1.29618													6.01262	6.73535			5.76824	-10.4654			7.29544	16.791
361.285									104.492	-47.1354			96.6906	3.67145			110.173	1.49429													6.50781	5.71247			6.37215	-10.3879			7.65378	16.3403
419.164									105.065	-46.7014			96.9252	2.9586			110.746	1.69262													6.9227	4.84059			7.01971	-10.4263			8.09488	15.5724
752.978									105.476	-46.387			97.8702	2.36061			111.061	1.87008													7.29369	4.32802			7.16705	-10.5956			8.56691	14.5978
596.009									106.089	-46.3649			98.1658	1.84276			111.565	1.85887													7.89525	4.23137			7.7755	-10.9085			9.04894	13.6135
1281.29									106.521	-46.7597			98.8024	1.28956			112.37	1.64982													8.45192	4.52638			8.28027	-11.2948			9.50733	12.7841
598.134									107.034	-47.5787			99.1153	0.62239			112.568	1.187													8.83682	5.07336			8.74593	-11.7866			9.9066	12.1459
721.552									107.508	-48.682			99.7438	-0.22995			113.102	0.48593													9.41192	5.69057			9.29708	-12.3854			10.4978	11.645
119.362									107.824	-49.8596			99.9939	-1.21847			113.559	-0.39111													9.99537	6.20249			9.6727	-13.114			11.038	11.1661
152.494									108.324	-50.9042			100.533	-2.28676			114.053	-1.3823													10.3551	6.50247			10.2539	-14.0093			11.5128	10.6165
493.28									108.831	-51.6787			101.177	-3.37654			114.465	-2.40955													10.8389	6.55629			10.7195	-15.0126			12.0248	9.95414
366.076									109.394	-52.1469			101.577	-4.35428			115.041	-3.41131													11.3628	6.38184			11.0615	-16.0182			12.3659	9.35301
311.863									109.848	-52.3436			101.965	-5.13067			115.625	-4.36116													11.8862	5.98699			11.6418	-16.87			12.7624	8.95897
411.063									110.406	-52.3199			102.447	-5.63737			115.727	-5.20708													12.29	5.40624			11.9683	-17.427			13.3336	8.892
543.786									110.782	-52.11			102.906	-5.7285			116.498	-5.92699													12.8207	4.60901			12.7841	-17.6539			13.9311	9.16361
450.786									111.182	-51.7529			103.474	-5.43832			116.903	-6.49907													13.2854	3.62053			12.8368	-17.5315			14.4095	9.64405
538.624									111.771	-51.4103			103.958	-4.7443			117.382	-6.88823													13.8112	2.53378			13.5281	-17.1678			14.847	10.1037
854.766									112.422	-51.3132			104.594	-3.80153			117.989	-7.14763													14.2361	1.45113			14.2502	-16.7101			15.3881	10.3458
986.574									112.862	-51.7093			104.907	-2.6758			118.199	-7.25442													14.6264	0.54481			14.5894	-16.2936			15.9184	10.2137
368.494									113.32	-52.7986			105.374	-1.51821			118.922	-7.21269													15.1717	-0.03722			14.976	-15.9972			16.2867	9.6463
297.04									113.779	-54.6042			106.027	-0.42579			119.392	-6.95791													15.6662	-0.30631			15.5271	-15.7737			16.9197	8.66094
772.913									114.243	-56.9577			106.59	0.49027			119.826	-6.46894													16.0475	-0.34088			16.1319	-15.5558			17.2726	7.37055
859.083									114.514	-59.5689			106.979	1.07891			120.255	-5.73335													16.791	-0.31819			16.473	-15.2337			17.6646	5.87215
324.971									115.061	-62.1404			107.551	1.36011			120.755	-4.81628													17.2159	-0.42382			16.8641	-14.7307			18.243	4.30595
209.341									115.634	-64.4463			107.768	1.31691			121.402	-3.92288													17.6077	-0.7403			17.5689	-14.1223			18.7651	2.78308
436.423									115.985	-66.3581			108.682	1.07364			121.955	-3.24197													18.1419	-1.24669			18.041	-13.4552			19.0379	1.3958
495.016									116.409	-67.8977			108.83	0.74456			122.325	-2.99082													18.5118	-1.8381			18.5712	-12.9508			19.6937	0.21943
471.68									116.993	-69.1262			109.373	0.40422			122.942	-3.21018													19.0437	-2.38922			18.9732	-12.7307			20.1102	-0.70649
189.855									117.521	-70.1092			109.752	0.09413			123.223	-3.83396													19.6419	-2.83883			19.4743	-12.8489			20.5613	-1.27621
524.361									117.918	-70.9246			110.518	-0.26728			123.806	-4.69502													19.9546	-3.20043			20.1228	-13.3313			21.0224	-1.44093
131.52									118.398	-71.6081			111.063	-0.68931			124.186	-5.56654													20.5628	-3.50639			20.3438	-14.0506			21.63	-1.19083
305.634									118.862	-72.1528			111.054	-1.17592			124.708	-6.30827													21.0921	-3.73762			20.9268	-14.8456			21.941	-0.54306
205.57									119.386	-72.5974			112.054	-1.6806			125.154	-6.82066													21.4279	-3.87797			21.457	-15.5138			22.5677	0.34802
163.497									119.784	-73.0108			112.103	-2.15947			125.743	-7.11565													22.0058	-3.83942			21.7263	-15.9156			23.1061	1.29883
274.423									120.465	-73.492			112.778	-2.61956			126.256	-7.28229													22.4128	-3.58742			22.3884	-16.0381			23.6154	2.11
173.72									120.847	-74.0975			113.307	-3.19242			126.497	-7.35048													22.9192	-3.15502			22.7849	-15.9541			24.1566	2.67032
418.629									121.291	-74.8673			113.854	-3.90383			127.281	-7.39725													23.5012	-2.66253			23.4079	-15.8916			24.433	2.92387
115.375									121.815	-75.7638			114.391	-4.79002			127.585	-7.45171													24.0463	-2.27101			23.9945	-16.0619			25.1388	2.93526
116.779									122.236	-76.7024			114.495	-5.7105			128.205	-7.4905													24.5047	-2.12512			24.2146	-16.6904			25.4826	2.79349
696.21									122.659	-77.5552			115.199	-6.53716			128.656	-7.52373													24.8513	-2.24628			24.9249	-17.8363			25.9592	2.61208
181.748									123.309	-78.2801			115.593	-7.06745			128.911	-7.50757													25.4569	-2.62191			25.3106	-19.3714			26.5531	2.42147
303.064									123.635	-78.8869			116.032	-7.24341			129.642	-7.50441													25.9481	-3.1355			25.6871	-21.0591			26.9278	2.2352
383.033									124.204	-79.4275			116.745	-7.21939			130.229	-7.53564													26.354	-3.63023			26.1637	-22.6088			27.5253	1.94913
581.05									124.616	-80.0488			117.234	-7.07779			130.464	-7.65773													26.8089	-3.99744			26.5484	-23.8179			27.9073	1.52241
411.067									125.201	-80.9176			117.567	-6.99882			131.19	-7.88387													27.4049	-4.07338			27.0968	-24.6552			28.4621	0.86186
337.955									125.69	-82.1395			118.071	-6.9986			131.447	-8.1518													27.8015	-3.76848			27.5379	-25.2428			29.0133	-0.02183
533.349									126.164	-83.824			118.588	-7.06583			131.994	-8.44946													28.3428	-2.98746			28.3656	-25.8361			29.3752	-1.08957
1042.77									126.47	-85.9147			119.22	-7.11524			132.517	-8.71432													28.736	-1.77249			28.6593	-26.6166			29.7372	-2.26994
677.52									127.097	-88.2498			119.357	-7.10416			132.954	-8.95438													29.3403	-0.24989			29.0349	-27.6635			30.382	-3.41715
588.027									127.477	-90.6225			120.063	-7.11393			133.642	-9.17279													29.8877	1.39611			29.4106	-28.9127			30.8186	-4.45798
617.222									127.798	-92.8764			120.64	-7.15768			133.863	-9.31983													30.4154	2.97711			30.0654	-30.157			31.337	-5.29274
333.905									128.459	-94.8114			121.077	-7.33399			134.472	-9.35082													30.9826	4.39758			30.542	-31.2456			31.6353	-5.79838
214.618									128.795	-96.4107			121.553	-7.6687			134.942	-9.1305													31.2996	5.69291			30.8239	-32.0519			32.3366	-5.91983
226.634									129.344	-97.6353			121.935	-8.04274			135.291	-8.61355													31.8096	6.96138			31.4306	-32.5518			32.6039	-5.62583
348.722									129.962	-98.6189			122.493	-8.41792			135.943	-7.92078													32.2094	8.2401			31.9571	-32.7756			33.2915	-4.99397
172.213									130.137	-99.4822			122.816	-8.7271			136.456	-7.23573													33.0383	9.58555			32.4119	-32.7466			33.6835	-4.17653
93.2124									130.727	-100.373			123.533	-9.01519			136.967	-6.85666													33.4405	10.943			33.0231	-32.5031			34.2574	-3.39841
542.513									131.387	-101.448			124.025	-9.40905			137.606	-6.89619													33.8152	12.2601			33.2532	-31.9937			34.8841	-2.90715
269.449									131.936	-102.826			124.342	-9.93562			137.93	-7.34262													34.3105	13.4449			33.8234	-31.2986			35.216	-2.88471
231.956									132.043	-104.553			125.086	-10.6413			138.363	-7.97898													34.9213	14.4121			34.4846	-30.4502			35.6689	-3.34808
188.193									132.684	-106.62			125.319	-11.377			138.643	-8.43728													35.3379	15.1279			34.8612	-29.5792			36.2656	-4.21196
403.156									132.993	-108.99			125.632	-11.9617			139.291	-8.52095													35.9267	15.5087			35.5287	-28.7702			36.7021	-5.27737
370.992									133.859	-111.545			126.501	-12.279			139.842	-8.06353													36.5383	15.566			35.8907	-28.0868			37.0559	-6.3369
427.32									134.044	-114.213			126.614	-12.2813			140.395	-7.13217													36.6741	15.3504			36.3182	-27.6167			37.5079	-7.14172
253.505									134.375	-116.834			127.419	-12.0486			140.889	-5.90464													37.2467	14.9751			36.8411	-27.3912			38.0973	-7.58085
297.272									134.91	-119.317			127.952	-11.6687			141.139	-4.56217													37.8122	14.468			37.3759	-27.431			38.6157	-7.60959
177.46									135.378	-121.577			128.166	-11.2713			142.01	-3.34002													38.3943	13.9278			38.119	-27.7697			39.0504	-7.32583
121.657									136.013	-123.598			128.857	-10.8855			142.368	-2.36769													38.8165	13.3303			38.1927	-28.3189			39.5088	-6.82621
185.836									136.372	-125.388			129.215	-10.5105			142.844	-1.71819													39.0686	12.6733			38.8484	-28.9337			40.0864	-6.23619
464.716									136.762	-126.966			129.806	-10.1899			143.536	-1.39862													39.8444	11.9506			39.2113	-29.3275			40.6366	-5.67115
221.247									137.229	-128.423			130.359	-9.87711			143.604	-1.33002													40.2044	11.1895			39.7215	-29.1908			41.0622	-5.21723
114.288									137.813	-129.847			130.712	-9.62046			144.353	-1.50734													40.6392	10.4184			40.3254	-28.28			41.4642	-4.93298
390.181									138.214	-131.367			131.243	-9.47821			144.769	-1.88088													41.1839	9.62471			40.6628	-26.4362			42.0008	-4.86425
205.792									138.956	-133.061			131.724	-9.4035			145.32	-2.4721													41.7487	8.85309			41.133	-23.7124			42.6257	-5.07512
427.805									139.018	-135.027			132.328	-9.412			145.972	-3.26011													41.9982	8.10337			41.8816	-20.3574			43.0941	-5.60918
429.181									139.7	-137.214			132.724	-9.41708			146.088	-4.14625													42.6588	7.40084			42.4081	-16.8144			43.3824	-6.41368
245.841									140.125	-139.508			133.163	-9.30159			146.7	-5.04162													43.0636	6.79272			42.9902	-13.5739			44.0017	-7.37254
539.641									140.561	-141.731			133.701	-8.96453			147.093	-5.73611													43.6191	6.26122			43.4841	-11.0136			44.4028	-8.31419
350.878									140.992	-143.615			134.028	-8.33818			147.611	-6.16452													44.017	5.74884			44.1153	-9.45676			44.9112	-9.0196
341.291									141.537	-144.966			134.766	-7.4887			148.313	-6.3376													44.4653	5.15264			44.4691	-8.86105			45.3705	-9.32041
236.671									141.793	-145.662			135.245	-6.59591			148.555	-6.28237													45.2058	4.51612			44.8829	-9.02281			45.7507	-9.12922
351.737									142.502	-145.714			135.654	-5.89813			149.161	-6.14937													45.5057	3.85625			45.3422	-9.62623			46.3601	-8.52009
469.603									142.987	-145.193			136.238	-5.61701			149.592	-5.95327													45.9032	3.24093			45.8469	-10.3725			46.9294	-7.70452
255.679									143.368	-144.331			136.835	-5.87886			150.134	-5.73257													46.4342	2.78953			46.4154	-11.0096			47.3714	-6.96647
473.287									144.127	-143.344			137.183	-6.64623			150.709	-5.46978													46.8183	2.51391			46.7019	-11.47			47.9671	-6.48933
956.542									144.483	-142.542			137.505	-7.71391			150.964	-5.1083													47.5743	2.38666			47.2921	-11.7225			48.4464	-6.38219
648.638									144.825	-142.133			138.105	-8.85647			151.601	-4.67977													48.0563	2.39489			48.0106	-11.8151			48.7957	-6.5621
625.134									145.559	-142.242			138.521	-9.85382			152.072	-4.20736													48.387	2.51449			48.1489	-11.7721			49.3277	-6.78145
294.715									146.102	-142.863			139.077	-10.5029			152.587	-3.82027													48.7012	2.81216			48.7282	-11.63			49.7088	-6.79565
156.075									146.49	-143.874			139.494	-10.7492			153.195	-3.57701													49.4365	3.27377			49.3385	-11.4232			50.26	-6.41689
850.834									146.652	-145.061			139.945	-10.568			153.52	-3.47294													49.9552	3.8382			49.8324	-11.2317			50.7966	-5.66595
473.185									147.267	-146.287			140.593	-10.0515			154.115	-3.46581													50.344	4.42755			50.0361	-11.1779			51.3359	-4.67587
385.784									147.825	-147.526			140.956	-9.29115			154.494	-3.36429													51.0698	4.88296			50.931	-11.3994			51.7352	-3.6312
545.182									148.427	-148.879			141.468	-8.42804			154.932	-3.03571													51.2608	5.1598			51.3021	-12.0085			52.5037	-2.70029
647.86									148.915	-150.546			142.163	-7.59549			155.457	-2.37815													51.8724	5.26529			51.7441	-12.9573			52.7638	-1.98731
415.372									149.199	-152.592			142.547	-6.91054			156.041	-1.4327													52.3826	5.21017			52.1079	-14.1178			53.2377	-1.48326
730.472									149.647	-155.029			142.863	-6.48837			156.657	-0.41398													52.7728	5.13804			52.6272	-15.2394			53.7342	-1.17075
580.282									150.158	-157.803			143.554	-6.3807			156.882	0.45238													53.4298	5.11582			53.1111	-16.0137			54.2608	-1.03759
142.131									150.604	-160.747			144.083	-6.59904			157.632	0.95735													53.7748	5.22388			53.474	-16.3201			54.9584	-1.09687
388.445									151.07	-163.725			144.577	-7.12682			158.154	1.01181													54.2687	5.48838			54.0224	-16.1369			55.1776	-1.30909
546.984									151.625	-166.495			144.758	-7.85837			158.457	0.62191													54.8137	5.97169			54.6254	-15.6502			55.6906	-1.57843
247.874									151.929	-168.688			145.472	-8.65438			159.02	-0.07495													55.1658	6.68198			55.2175	-15.0713			56.2399	-1.7534
948.749									152.411	-169.724			145.941	-9.28175			159.292	-0.83955													55.9116	7.49084			55.5604	-14.6359			56.6837	-1.63749
370.749									152.728	-168.991			146.31	-9.60064			159.957	-1.47602													56.3708	8.27098			56.1506	-14.3643			57.0921	-1.16513
284.416									153.279	-166.029			146.842	-9.51924			160.487	-1.84259													56.6012	8.78247			56.559	-14.1985			57.6678	-0.32567
141.893									153.812	-160.766			147.291	-9.01028			160.841	-1.89474													57.3852	8.86293			56.921	-14.0121			58.1644	0.68407
318.681									154.362	-153.702			147.781	-8.2292			161.257	-1.68676													57.8552	8.44396			57.5303	-13.6886			58.8365	1.60258
147.842									155.329	-145.747			148.543	-7.39843			161.85	-1.32598													58.3703	7.51375			58.0133	-13.1454			59.1621	2.20641
405.292									155.94	-137.988			148.874	-6.74936			162.652	-1.00769													58.635	6.27711			58.7154	-12.3805			59.7887	2.38148
693.342									156.499	-131.366			149.399	-6.43819			162.829	-0.81342													59.0183	4.97988			58.9209	-11.4214			60.2162	2.20852
374.066									156.998	-126.473			149.765	-6.50649			163.267	-0.77437													59.7071	3.80794			59.4666	-10.3768			60.5291	1.83797
429.339									157.443	-123.398			150.464	-6.94772			163.863	-0.87628													60.1669	2.88254			59.986	-9.39879			61.1257	1.46192
548.385									157.83	-121.879			150.786	-7.62478			164.334	-1.05183													60.6203	2.18648			60.6153	-8.64425			61.5395	1.20948
0									158.336	-121.46			151.169	-8.37136			164.826	-1.27594													61.0519	1.65619			61.2147	-8.30473			62.1289	1.07026
0									158.969	-121.739			151.836	-9.06967			165.298	-1.50022													61.5652	1.21027			61.563	-8.41109			62.6646	0.95653
									159.303	-122.431			152.19	-9.60951			165.786	-1.72731													62.242	0.76556			61.9286	-8.90924			63.0738	0.74649
									159.718	-123.433			152.778	-9.92315			166.316	-1.90215													62.4659	0.40218			62.4334	-9.66951			63.5786	0.40226
									160.257	-124.766			153.107	-10.0177			166.694	-1.98217													62.9523	0.24709			62.8354	-10.53			64.0515	-0.01325
									160.964	-126.457			153.676	-9.90022			167.231	-1.91565													63.6412	0.45042			63.5957	-11.4019			64.499	-0.40336
									161.256	-128.574			154.274	-9.67538			167.724	-1.64781													63.9435	1.13457			63.9532	-12.1865			64.9965	-0.62938
									161.592	-131.071			154.7	-9.45668			168.244	-1.20765													64.3751	2.24087			64.2833	-12.8855			65.4349	-0.61345
									162.076	-133.885			155.102	-9.35382			168.691	-0.61													65.0497	3.594			64.8809	-13.4641			65.9724	-0.43146
									162.649	-136.836			155.753	-9.43379			169.235	0.08289													65.5955	4.86308			65.261	-13.8656			66.4617	-0.18051
									163.106	-139.776			156.182	-9.76799			169.836	0.83479													66.1531	5.72226			65.9095	-14.047			67.1229	0.00424
									163.495	-142.529			156.595	-10.3455			170.04	1.60551													66.5816	5.90819			66.3624	-13.9662			67.4267	0.02861
									163.791	-144.931			157.137	-11.127			170.742	2.31946													67.0242	5.4086			66.7781	-13.6373			67.9778	-0.07834
									164.348	-146.95			157.553	-12.0959			171.286	2.91861													67.5238	4.44636			67.2283	-13.082			68.3907	-0.25769
									164.986	-148.561			158.081	-13.1968			171.788	3.35831													67.815	3.32805			67.7148	-12.4376			68.8619	-0.41768
									165.347	-149.787			158.563	-14.4502			172.139	3.588													68.4965	2.36481			68.4461	-11.8964			69.3603	-0.51342
									165.975	-150.525			158.932	-15.7883			172.606	3.64411													68.8671	1.81405			68.9163	-11.6125			70.0124	-0.62156
									166.173	-150.552			159.579	-17.1197			173.321	3.49633													69.3041	1.70683			69.2482	-11.7369			70.3471	-0.83571
									166.815	-149.518			160.001	-18.3026			173.571	3.16026													69.8375	1.92465			69.8167	-12.2569			70.84	-1.24362
									167.176	-147.055			160.23	-19.1467			174.123	2.59666													70.5673	2.26855			70.2623	-13.0314			71.4594	-1.85225
									167.712	-142.996			160.886	-19.4809			174.737	1.78598													70.8613	2.52911			70.7016	-13.8539			71.7868	-2.56552
									168.364	-137.535			161.349	-19.2556			175.083	0.78305													71.3663	2.56594			71.0409	-14.4955			72.3207	-3.20119
									168.831	-131.241			161.85	-18.5564			175.573	-0.34444													71.8485	2.35259			71.8048	-14.8432			72.6826	-3.58801
									169.742	-124.959			162.513	-17.5275			176.032	-1.43836													72.4014	1.99035			72.0922	-14.8506			73.1747	-3.60388
									170.342	-119.495			162.814	-16.3661			176.355	-2.38446													72.7808	1.67563			72.617	-14.5775			73.8568	-3.24027
									170.8	-115.441			163.489	-15.2673			177.125	-3.11095													73.2885	1.5805			73.2709	-14.1092			74.227	-2.60971
									171.219	-112.976			163.925	-14.332			177.364	-3.59763													73.7421	1.90509			73.5847	-13.4706			74.7299	-1.97099
									171.592	-111.881			164.295	-13.674			178.019	-3.94936													74.2571	2.68606			74.1995	-12.7433			75.2874	-1.54527
									172.145	-111.812			164.947	-13.3386			178.491	-4.17089													74.7445	3.8744			74.5652	-12.0118			75.7813	-1.55275
									172.618	-112.332			165.502	-13.3023			178.894	-4.3188													75.3497	5.26824			75.1209	-11.3926			76.357	-2.07026
									173.076	-113.215			165.93	-13.4857			179.373	-4.41438													75.8373	6.63842			75.7593	-10.9767			76.7126	-2.98935
									173.578	-114.338			166.234	-13.6686			179.916	-4.42145													76.3125	7.74302			76.1468	-10.8538			77.1619	-4.07422
									174.06	-115.68			166.759	-13.6639			180.47	-4.34061													76.8419	8.42285			76.7434	-11.0387			77.4993	-5.00406
									174.678	-117.301			167.345	-13.3684			180.83	-4.17373													77.3485	8.6004			77.0281	-11.4001			78.0523	-5.57633
									174.844	-119.19			167.656	-12.7491			181.268	-3.92071													77.757	8.31327			77.3955	-11.8503			78.7235	-5.70558
									175.425	-121.326			168.435	-12.005			182.089	-3.62457													78.2897	7.66838			78.1604	-12.2892			79.0127	-5.44346
									175.983	-123.696			168.968	-11.2831			182.201	-3.29766													78.6503	6.76171			78.5733	-12.6904			79.6112	-4.96692
									176.357	-126.255			169.296	-10.7705			182.856	-2.99429													79.3012	5.74472			79.1163	-13.0749			80.1632	-4.46483
									176.941	-128.946			169.75	-10.5455			183.457	-2.69985													79.7155	4.70685			79.3891	-13.3989			80.6498	-4.03976
									177.164	-131.683			170.238	-10.6116			183.786	-2.44939													80.047	3.72878			80.0731	-13.6633			81.0164	-3.71881
									177.701	-134.327			170.91	-10.8965			184.32	-2.21495													80.6588	2.89888			80.435	-13.8172			81.5357	-3.44334
									178.24	-136.786			171.316	-11.3105			184.832	-1.97051													81.205	2.33573			80.8843	-13.8614			82.1432	-3.16007
									178.65	-139.026			171.593	-11.8189			185.259	-1.75335													81.5841	2.08728			81.5128	-13.8531			82.4834	-2.83991
									179.07	-141.061			172.301	-12.3888			185.811	-1.58021													81.9762	2.18678			81.9639	-13.8596			83.0209	-2.49157
									179.613	-142.981			172.57	-12.9818			186.376	-1.52528													82.6466	2.60784			82.5924	-13.9473			83.5593	-2.15533
									180.046	-144.938			173.343	-13.6418			186.732	-1.66451													82.9521	3.19364			82.8507	-14.0367			84.1232	-1.83826
									180.601	-147.043			173.672	-14.3217			187.258	-1.93588													83.7428	3.74542			83.2799	-14.0302			84.4942	-1.58097
									181.073	-149.366			174.2	-14.9821			187.925	-2.28884													84.1725	4.08409			83.9639	-13.8447			84.9645	-1.35012
									181.341	-151.898			174.45	-15.5808			188.053	-2.59139													84.5592	4.1292			84.3031	-13.4274			85.4701	-1.11823
									181.951	-154.519			175.01	-16.1154			188.617	-2.70025													84.9269	3.97928			84.9243	-12.8765			86.0104	-0.88637
									182.408	-157.034			175.739	-16.6655			189.305	-2.59343													85.6675	3.74516			85.3827	-12.292			86.5406	-0.75915
									182.725	-159.223			176.153	-17.2835			189.583	-2.3411													85.9886	3.66673			86.0166	-11.7539			86.9181	-0.8165
									183.32	-160.843			176.508	-18.0259			190.238	-2.13647													86.379	3.8503			86.3986	-11.3288			87.4992	-1.13931
									183.648	-161.669			177.077	-18.8475			190.796	-2.17078													87.0193	4.35037			86.5987	-10.952			87.9885	-1.73643
									184.24	-161.461			177.417	-19.5779			191.153	-2.56882													87.5495	5.0784			87.5473	-10.6399			88.4778	-2.54752
									184.808	-159.954			177.957	-20.1098			191.668	-3.34478													87.973	5.93335			87.8338	-10.3909			88.8225	-3.44062
									185.168	-156.978			178.389	-20.2958			192.177	-4.38165													88.5901	6.73316			88.2512	-10.354			89.2809	-4.24089
									185.672	-152.479			178.985	-20.1667			192.473	-5.58041													88.874	7.39725			88.9297	-10.6471			89.8284	-4.84425
									186.105	-146.638			179.526	-19.7539			193.003	-6.75801													89.6203	7.83904			89.4099	-11.3154			90.4642	-5.14541
									187.048	-139.97			179.888	-19.1309			193.561	-7.87397													89.882	8.03062			89.7537	-12.3213			90.737	-5.09856
									187.67	-133.128			180.496	-18.3587			194.143	-8.8789													90.6193	7.97023			90.364	-13.4159			91.3046	-4.71251
									188.206	-126.853			180.849	-17.4388			194.402	-9.7056													90.8346	7.70992			90.5204	-14.3021			91.6702	-4.06584
									188.661	-121.713			181.446	-16.4038			194.916	-10.3552													91.4588	7.30256			91.1962	-14.7025			92.3814	-3.32065
									189.176	-118.002			182.012	-15.3392			195.435	-10.7588													91.9369	6.79338			91.5445	-14.5013			92.8616	-2.70687
									189.826	-115.78			182.384	-14.3126			195.831	-10.8908													92.4203	6.2928			92.2712	-13.8484			93.3309	-2.42262
									190.218	-114.91			183.073	-13.4341			196.657	-10.7172													92.8515	5.87248			92.6432	-12.9718			93.8875	-2.64569
									190.606	-115.097			183.398	-12.7562			196.776	-10.28													93.3561	5.56174			93.3308	-12.2452			94.1931	-3.41587
									191.146	-116.09			183.915	-12.3095			197.386	-9.55069													93.7902	5.34816			93.8364	-11.8786			94.7552	-4.65343
									191.557	-117.63			184.544	-12.0378			197.856	-8.59861													94.3298	5.12843			94.1211	-11.9156			95.2672	-6.21269
									192.186	-119.533			184.883	-11.8621			198.413	-7.55745													94.9536	4.84452			94.6486	-12.2118			95.6901	-7.8637
									192.419	-121.59			185.347	-11.7598			199.041	-6.59274													95.3164	4.38506			95.1188	-12.5855			96.0521	-9.41805
									192.992	-123.663			185.905	-11.7091			199.397	-5.86425													95.8149	3.83634			95.5308	-12.8771			96.616	-10.6902
									193.473	-125.561			186.357	-11.7999			199.975	-5.48601													96.167	3.22158			96.1029	-13.0783			96.9798	-11.608
									193.966	-127.077			186.946	-12.1252			200.354	-5.44776													96.7557	2.67628			96.6677	-13.1844			97.6928	-12.158
									194.225	-127.975			187.431	-12.7515			201.1	-5.61508													97.2456	2.26052			97.2434	-13.3165			97.9748	-12.4403
									194.892	-128.101			187.887	-13.6821			201.114	-5.82192													97.7815	2.01726			97.4208	-13.4748			98.5341	-12.5585
									195.281	-127.425			188.217	-14.7456			201.806	-5.85671													98.1628	2.00011			98.0838	-13.6898			99.1499	-12.5523
									195.799	-126.104			188.742	-15.7436			202.441	-5.69638													98.6896	2.22036			98.4549	-13.9133			99.5209	-12.4409
									196.414	-124.426			189.288	-16.3955			202.81	-5.29021													99.2017	2.68712			99.0906	-14.1566			99.952	-12.1528
									197.074	-122.775			189.637	-16.5287			203.324	-4.7589													99.5569	3.32025			99.6472	-14.4376			100.434	-11.678
									197.406	-121.466			190.168	-16.1273			203.808	-4.16557													100.299	4.06273			99.9428	-14.7328			100.967	-11.0279
									197.888	-120.784			190.673	-15.3065			204.383	-3.61798													100.679	4.77222			100.346	-15.026			101.564	-10.3335
									198.366	-120.807			191.287	-14.3562			204.806	-3.20518													101.284	5.37451			101.097	-15.2721			102.118	-9.73815
									199.046	-121.561			191.85	-13.5226			205.291	-2.9758													101.64	5.82511			101.381	-15.4753			102.469	-9.35451
									199.344	-122.866			192.298	-12.9745			205.837	-2.99913													102.02	6.14987			101.963	-15.6583			102.928	-9.19433
									199.8	-124.523			192.776	-12.7331			206.385	-3.22629													102.741	6.35607			102.392	-15.7941			103.485	-9.2536
									200.249	-126.194			193.014	-12.7031			206.604	-3.69077													103.157	6.45846			103.058	-15.88			103.945	-9.50304
									200.684	-127.614			193.759	-12.7664			207.42	-4.34031													103.744	6.44972			103.348	-15.7939			104.539	-9.87155
									201.142	-128.604			194.151	-12.8372			207.561	-5.08135													103.986	6.33438			103.788	-15.395			104.787	-10.3838
									201.699	-129.214			194.638	-12.8957			208.33	-5.86212													104.631	6.1897			104.357	-14.6115			105.453	-11.0553
									202.11	-129.63			195.386	-12.9622			208.65	-6.51269													105.085	5.99901			104.765	-13.437			105.955	-11.9244
									202.882	-130.154			195.466	-13.0527			209.151	-6.90578													105.572	5.80844			105.534	-12.0723			106.285	-12.9913
									203.11	-131.071			196.113	-13.1899			209.619	-6.89001													106.07	5.58094			105.97	-10.7385			106.87	-14.2242
									203.77	-132.514			196.625	-13.3582			209.975	-6.43854													106.587	5.34263			106.366	-9.60295			107.333	-15.5348
									204.066	-134.4			197.154	-13.5356			210.652	-5.6583													107.026	5.07456			107.005	-8.79212			107.806	-16.7747
									204.513	-136.563			197.602	-13.7415			211.205	-4.79152													107.509	4.84907			107.424	-8.28947			108.091	-17.8133
									204.919	-138.84			198.083	-13.9242			211.677	-4.15159													108.013	4.73587			107.766	-8.03483			108.766	-18.5061
									205.573	-141.045			198.532	-14.0845			212.302	-4.04189													108.352	4.76382			108.445	-7.96877			109.169	-18.8153
									205.905	-143.144			198.942	-14.1751			212.507	-4.56495													109.101	4.90672			108.787	-8.13593			109.719	-18.7387
									206.367	-145.116			199.588	-14.2125			213.246	-5.72908													109.467	5.08871			109.533	-8.59406			110.15	-18.3739
									207.01	-146.933			200.128	-14.2028			213.528	-7.26444													109.981	5.30425			109.788	-9.34389			110.732	-17.7965
									207.298	-148.544			200.45	-14.1299			214.004	-8.92409													110.444	5.58801			110.356	-10.3212			111.199	-17.0937
									207.697	-149.823			200.94	-14.035			214.404	-10.4244													111.04	6.03968			110.805	-11.3263			111.592	-16.3563
									208.259	-150.77			201.578	-13.8582			214.897	-11.5529													111.229	6.71568			111.16	-12.1611			112.272	-15.638
									208.889	-151.402			201.878	-13.5506			215.464	-12.2595													111.941	7.61661			111.576	-12.6506			112.637	-14.9901
									209.082	-151.854			202.516	-13.0846			215.904	-12.5448													112.409	8.51074			112.247	-12.729			113.212	-14.47
									209.901	-152.315			203.003	-12.4632			216.476	-12.4898													113.1	9.12175			112.822	-12.4624			113.643	-14.1691
									210.27	-152.905			203.428	-11.7156			216.896	-12.1561													113.478	9.19463			113.216	-11.965			114.138	-14.1021
									210.741	-153.646			203.842	-10.9506			217.252	-11.5686													113.968	8.60584			113.635	-11.3318			114.687	-14.3078
									211.12	-154.522			204.578	-10.3209			218.058	-10.7702													114.405	7.50072			114.17	-10.6761			115.182	-14.7276
									211.605	-155.422			205.068	-9.95447			218.364	-9.77123													114.803	6.08642			114.748	-10.0442			115.587	-15.277
									212.195	-156.268			205.421	-9.93907			218.788	-8.68181													115.287	4.65867			115.25	-9.55457			116.026	-15.7999
									212.596	-157.081			205.936	-10.268			219.451	-7.64423													115.662	3.39727			115.599	-9.2514			116.481	-16.216
									213.073	-157.965			206.477	-10.8073			219.954	-6.80048													116.459	2.40243			116.278	-9.17707			117.086	-16.4666
									213.685	-159.055			206.848	-11.3746			220.538	-6.23416													116.724	1.59226			116.74	-9.31454			117.575	-16.5162
									213.977	-160.417			207.256	-11.8446			220.87	-5.92156													117.229	0.96318			117.049	-9.57759			117.997	-16.3993
									214.632	-162.14			207.868	-12.181			221.379	-5.77594													117.678	0.44367			117.612	-9.88028			118.551	-16.1164
									215.067	-164.144			208.329	-12.4837			221.752	-5.56043													118.212	0.07563			118.081	-10.1599			118.929	-15.6902
									215.28	-166.343			208.867	-12.9484			222.352	-5.1612													118.81	-0.03988			118.614	-10.4223			119.479	-15.1335
									215.914	-168.672			209.441	-13.7521			222.89	-4.55491													119.078	0.17615			119.163	-10.7138			119.982	-14.4834
									216.378	-171.097			209.807	-14.8954			223.37	-3.80183													119.623	0.76228			119.523	-11.063			120.664	-13.8
									216.911	-173.576			210.208	-16.2618			223.77	-3.122													120.117	1.66204			120.124	-11.4564			120.888	-13.1531
									217.341	-176.067			210.745	-17.5857			224.382	-2.75997													120.72	2.73911			120.501	-11.7918			121.439	-12.6001
									217.668	-178.419			211.075	-18.5214			225.016	-2.87276													121.159	3.68619			120.908	-12.0038			122.012	-12.2086
									218.22	-180.379			211.604	-18.866			225.465	-3.52367													121.886	4.30909			121.576	-11.9574			122.511	-12.0129
									218.621	-181.591			212.105	-18.5283			225.546	-4.60468													122.168	4.44607			121.967	-11.6561			123.004	-12.0942
									219.06	-181.741			212.69	-17.6521			226.387	-5.95159													122.497	4.15392			122.447	-11.1364			123.399	-12.489
									219.672	-180.608			213.161	-16.4972			226.672	-7.29618													123.27	3.61296			123.006	-10.4325			123.934	-13.1733
									220.032	-178.117			213.679	-15.3953			227.169	-8.46884													123.653	3.07087			123.534	-9.62757			124.449	-14.0908
									220.557	-174.433			214.351	-14.6632			227.686	-9.35836													123.948	2.73741			124.023	-8.77408			124.891	-15.0906
									221.403	-169.847			214.639	-14.5005			228.131	-9.94052													124.421	2.70796			124.366	-7.95699			125.311	-15.9982
									221.797	-164.819			215.089	-15.0174			228.598	-10.2646													125.243	2.94856			125.027	-7.27462			125.765	-16.6215
									222.359	-159.845			215.862	-16.1651			229.183	-10.3493													125.611	3.36959			125.416	-6.80603			126.224	-16.8874
									222.898	-155.347			215.979	-17.7374			229.668	-10.2076													126.081	3.88754			126.237	-6.68295			126.899	-16.7447
									223.493	-151.678			216.613	-19.4583			230.154	-9.75624													126.457	4.37775			126.413	-6.92853			127.246	-16.2161
									224.172	-149.001			216.982	-20.9531			230.394	-8.90978													127.014	4.82301			126.831	-7.44154			127.785	-15.3628
									224.415	-147.327			217.372	-21.9009			231.112	-7.69601													127.578	5.07155			127.465	-8.08041			128.307	-14.3018
									224.893	-146.583			217.92	-22.0658			231.643	-6.14803													128.135	5.01163			127.864	-8.71387			128.739	-13.1642
									225.39	-146.607			218.394	-21.4239			232.164	-4.46212													128.492	4.62726			128.415	-9.25148			129.291	-12.086
									226.024	-147.305			219.014	-20.1596			232.72	-2.84609													129.1	3.94458			128.707	-9.72791			129.896	-11.1394
									226.467	-148.62			219.461	-18.5947			233.07	-1.48027													129.391	3.08648			129.332	-10.2081			130.383	-10.4037
									226.776	-150.436			220.037	-17.165			233.805	-0.48376													129.876	2.17383			130.098	-10.7958			130.707	-9.89214
									227.383	-152.648			220.646	-16.2254			234.082	0.09719													130.455	1.35544			130.265	-11.4625			131.205	-9.60201
									227.788	-155.02			221.047	-15.9549			234.626	0.21363													130.827	0.63186			130.676	-12.1547			131.745	-9.5304
									228.174	-157.32			221.562	-16.3945			235.168	-0.13137													131.582	-0.09354			131.192	-12.6384			132.42	-9.67078
									228.694	-159.245			221.892	-17.3502			235.64	-0.92286													131.799	-0.90741			131.769	-12.8005			132.78	-10.0197
									229.029	-160.589			222.401	-18.5633			236.144	-2.13295													132.327	-1.83371			132.183	-12.6055			133.188	-10.5368
									229.643	-161.197			222.872	-19.7548			236.549	-3.57629													132.879	-2.83443			132.764	-12.1249			133.522	-11.1112
									230.174	-161.005			223.351	-20.7299			236.972	-5.05969													133.299	-3.75067			133.142	-11.5592			134.283	-11.6932
									230.593	-159.985			223.832	-21.4592			237.389	-6.35617													133.819	-4.4151			133.807	-11.1013			134.697	-12.2224
									231.088	-158.168			224.248	-21.97			237.88	-7.30688													134.125	-4.64577			134.307	-10.8925			135.16	-12.6768
									231.526	-155.679			224.915	-22.3897			238.554	-7.87069													134.696	-4.36692			134.834	-10.9681			135.567	-13.0091
									232.259	-152.786			225.352	-22.7482			238.803	-8.05426													135.371	-3.54019			134.98	-11.2094			136.132	-13.1893
									232.63	-149.854			225.81	-23.0368			239.443	-7.98911													135.684	-2.22417			135.642	-11.5722			136.56	-13.2031
									233.459	-147.254			226.229	-23.1838			239.954	-7.73424													136.243	-0.60247			136.17	-11.9798			137.112	-13.0709
									233.684	-145.377			226.586	-23.0755			240.333	-7.31465													136.824	1.16288			136.696	-12.4421			137.491	-12.8214
									234.367	-144.42			227.247	-22.7016			240.97	-6.7518													137.206	2.77662			137.184	-12.9786			138.2	-12.567
									234.744	-144.445			227.886	-22.1014			241.313	-5.96445													137.816	3.97351			137.582	-13.6098			138.573	-12.3447
									235.257	-145.291			228.222	-21.3395			241.862	-4.96373													138.438	4.53121			137.977	-14.3494			139.09	-12.2081
									235.67	-146.677			228.784	-20.5115			242.319	-3.83455													138.858	4.34323			138.608	-15.139			139.426	-12.1303
									236.143	-148.299			229.079	-19.6621			242.927	-2.783													139.163	3.4936			139.026	-15.8776			140.007	-12.1543
									236.6	-149.85			229.861	-18.7948			243.525	-2.07433													139.751	2.21727			139.636	-16.5103			140.624	-12.2959
									236.854	-151.19			230.256	-17.9071			243.847	-1.91088													140.215	0.84991			139.84	-16.9426			141.036	-12.6237
									237.686	-152.255			230.683	-16.9895			244.487	-2.44153													140.556	-0.25341			140.443	-17.1859			141.473	-13.1313
									238.071	-153.099			231.291	-16.0445			245.04	-3.5467													141.086	-0.94646			140.916	-17.272			142.034	-13.7492
									238.592	-153.653			231.695	-15.1351			245.086	-4.93189													141.58	-1.18747			141.51	-17.2968			142.31	-14.336
									238.959	-153.802			232.147	-14.3917			245.776	-6.22608													142.164	-1.12351			142.174	-17.3785			142.939	-14.781
									239.419	-153.289			232.886	-13.9103			246.199	-7.04419													142.666	-0.929			142.255	-17.5351			143.422	-14.9907
									239.9	-151.92			233.283	-13.8046			246.678	-7.23018													143.168	-0.72699			142.862	-17.7628			143.927	-14.936
									240.292	-149.698			233.679	-14.126			247.128	-6.79251													143.559	-0.47935			143.529	-17.9682			144.274	-14.637
									241.087	-146.848			234.294	-14.7933			247.723	-5.9705													144.048	-0.08997			143.802	-18.0917			144.98	-14.2071
									241.679	-143.842			234.559	-15.6962			248.408	-5.07499													144.482	0.51716			144.334	-18.0929			145.392	-13.7385
									242.192	-141.154			235.067	-16.6601			248.765	-4.31805													145.1	1.36344			144.875	-17.9847			145.805	-13.3783
									242.644	-139.18			235.697	-17.5779			249.254	-3.87571													145.503	2.29462			145.383	-17.8753			146.368	-13.2653
									243.096	-138.026			236.11	-18.426			249.702	-3.6868													146.226	3.03157			145.922	-17.8031			146.962	-13.5241
									243.604	-137.667			236.432	-19.2092			250.12	-3.63348													146.554	3.3209			146.23	-17.7986			147.454	-14.1452
									244.048	-137.975			237.161	-20.0401			250.739	-3.66772													147.155	3.02811			146.919	-17.8396			147.701	-15.0301
									244.603	-138.85			237.548	-20.9518			251.11	-3.7785													147.514	2.18941			147.216	-17.8422			148.258	-15.954
									244.915	-140.261			238.012	-21.8744			251.76	-4.02924													148.051	1.05455			147.889	-17.7895			148.785	-16.6816
									245.665	-142.146			238.498	-22.6788			252.21	-4.47624													148.441	-0.04362			148.12	-17.683			149.116	-17.0603
									245.983	-144.451			238.939	-23.1874			252.557	-5.14234													148.834	-0.77108			148.826	-17.54			149.762	-17.0408
									246.401	-146.967			239.304	-23.1909			253.282	-5.93516													149.417	-0.90708			149.374	-17.4613			150.183	-16.7035
									246.785	-149.438			239.85	-22.629			253.408	-6.70388													149.925	-0.39283			149.723	-17.5069			150.809	-16.2041
									247.249	-151.613			240.432	-21.5362			254.017	-7.31068													150.404	0.62628			150.256	-17.6658			151.208	-15.7263
									247.74	-153.354			241.173	-20.0657			254.533	-7.64828													150.916	1.86689			150.736	-17.8687			151.666	-15.4612
									248.274	-154.635			241.314	-18.4307			255.135	-7.73188													151.54	3.00711			151.167	-18.0079			152.234	-15.5327
									248.824	-155.558			241.9	-16.9032			255.457	-7.61825													151.929	3.75568			151.645	-17.9838			152.734	-16
									249.128	-156.262			242.545	-15.6949			255.956	-7.38998													152.56	4.03063			152.23	-17.7198			153.259	-16.8344
									249.775	-156.865			243.101	-14.9731			256.581	-7.16122													152.942	3.89228			152.627	-17.2528			153.534	-17.9084
									250.171	-157.5			243.503	-14.8319			257.016	-6.94601													153.375	3.57327			153.201	-16.5583			154.181	-19.0095
									250.667	-158.224			243.992	-15.223			257.553	-6.76349													153.726	3.34442			153.698	-15.7649			154.451	-19.9612
									251.143	-159.116			244.357	-15.9737			257.891	-6.59493													154.385	3.3381			154.132	-14.9325			154.979	-20.5822
									251.69	-160.238			244.894	-16.8663			258.392	-6.38311													154.801	3.55192			154.69	-14.1586			155.653	-20.856
									252.079	-161.608			245.3	-17.7091			259.069	-6.16458													155.489	3.85814			155.226	-13.5312			156.031	-20.82
									252.641	-163.194			245.894	-18.3555			259.396	-5.97411													155.87	4.0748			155.612	-13.1134			156.496	-20.539
									252.984	-164.896			246.349	-18.6975			259.994	-5.89333													156.314	4.11602			156.263	-12.9762			156.944	-20.0939
									253.489	-166.557			246.733	-18.755			260.469	-5.97018													156.863	3.95735			156.67	-13.1222			157.616	-19.5462
									253.976	-167.919			247.382	-18.4972			260.837	-6.26364													157.283	3.70867			156.942	-13.5596			158.011	-18.9515
									254.453	-168.722			247.766	-17.9995			261.495	-6.77551													157.694	3.45215			157.789	-14.2434			158.459	-18.3945
									254.863	-168.674			248.212	-17.3581			261.843	-7.4451													158.354	3.24979			158.104	-15.0931			158.905	-17.9739
									255.363	-167.508			248.817	-16.7375			262.369	-8.26847													158.786	3.07811			158.575	-15.9769			159.649	-17.7862
									255.804	-165.106			249.459	-16.2949			262.803	-9.16197													159.201	2.86695			158.894	-16.7141			160.086	-17.8906
									256.421	-161.506			249.805	-16.172			263.315	-10.0946													159.761	2.579			159.486	-17.2017			160.358	-18.2322
									257.022	-156.962			250.286	-16.355			263.813	-11.0071													160.21	2.16224			160.065	-17.3752			160.935	-18.6703
									257.608	-151.91			250.743	-16.7564			264.241	-11.7849													160.862	1.65722			160.361	-17.2782			161.428	-19.0286
									258.075	-146.823			251.087	-17.2656			264.745	-12.3735													160.986	1.1211			161.07	-17.0849			161.855	-19.1611
									258.741	-142.227			251.89	-17.7831			265.155	-12.6622													161.766	0.65618			161.547	-16.8458			162.411	-18.9794
									259.36	-138.488			252.138	-18.2542			265.643	-12.5792													162.082	0.38881			161.947	-16.6971			162.787	-18.4545
									259.677	-135.853			252.639	-18.6622			266.337	-12.1469													162.687	0.37185			162.453	-16.7135			163.524	-17.6579
									260.33	-134.348			253.21	-18.9954			266.557	-11.3737													163.074	0.63504			162.842	-16.8849			163.83	-16.7155
									260.692	-133.903			253.744	-19.2386			267.227	-10.4116													163.577	1.06175			163.526	-17.317			164.328	-15.7782
									261.264	-134.318			253.992	-19.378			267.704	-9.43414													164.133	1.50844			163.897	-18.0177			164.963	-14.9839
									261.654	-135.337			254.557	-19.3764			268.219	-8.63696													164.67	1.72983			164.481	-19.0332			165.393	-14.4847
									262.069	-136.699			255.264	-19.3071			268.862	-8.14682													165.168	1.56309			164.963	-20.2619			165.955	-14.4707
									262.682	-138.211			255.596	-19.2224			269.168	-7.98145													165.608	0.85564			165.01	-21.5244			166.33	-14.9848
									263	-139.731			256.019	-19.2097			269.656	-8.0941													166.064	-0.28286			165.994	-22.6321			166.854	-16.0309
									263.566	-141.211			256.677	-19.3671			270.178	-8.36486													166.566	-1.75819			166.182	-23.3408			167.36	-17.5128
									263.928	-142.625			257.03	-19.7264			270.484	-8.72876													166.877	-3.25444			166.67	-23.5176			167.824	-19.2245
									264.644	-143.974			257.572	-20.3339			271.229	-9.17423													167.632	-4.51135			167.333	-23.1165			168.139	-20.9426
									264.973	-145.255			258.088	-21.1661			271.696	-9.67816													167.746	-5.27954			167.542	-22.1945			168.634	-22.4016
									265.306	-146.409			258.445	-22.1399			272.12	-10.3007													168.418	-5.46082			168.363	-20.9362			169.152	-23.4409
									265.875	-147.417			259.074	-23.1019			272.498	-11.008													168.866	-5.06865			168.746	-19.522			169.748	-24.0056
									266.481	-148.238			259.333	-23.9112			272.974	-11.7782													169.564	-4.24994			169.347	-18.1717			169.982	-24.1267
									266.874	-148.845			259.901	-24.4317			273.599	-12.549													169.794	-3.19468			169.811	-17.0433			170.677	-23.9797
									267.341	-149.191			260.376	-24.5935			274.016	-13.245													170.567	-2.09433			170.212	-16.1706			171.16	-23.7525
									267.817	-149.154			260.937	-24.4446			274.54	-13.8551													170.895	-1.05665			170.827	-15.606			171.668	-23.6199
									268.347	-148.645			261.385	-24.14			274.892	-14.3628													171.423	-0.09855			171.234	-15.2422			172.167	-23.6306
									268.695	-147.633			261.911	-23.8468			275.317	-14.7928													171.924	0.79906			171.774	-15.0277			172.614	-23.7281
									269.285	-146.248			262.436	-23.7703			276.02	-15.2455													172.419	1.63234			172.259	-14.9331			173.008	-23.765
									269.914	-144.708			262.892	-24.0373			276.51	-15.7583													172.858	2.39549			172.631	-14.9447			173.515	-23.6042
									270.436	-143.357			263.394	-24.6674			277.002	-16.3814													173.458	2.98974			173.223	-15.19			173.987	-23.214
									270.936	-142.484			263.869	-25.5952			277.254	-17.0395													173.942	3.3278			173.812	-15.6932			174.625	-22.6915
									271.402	-142.223			264.318	-26.5991			277.777	-17.6592													174.485	3.38346			174.163	-16.533			175.098	-22.2463
									271.803	-142.513			264.666	-27.5302			278.364	-18.1368													174.847	3.20847			174.745	-17.626			175.567	-22.1425
									272.271	-143.241			265.228	-28.1677			278.811	-18.4229													175.302	2.96347			175.111	-18.7732			176.059	-22.5024
									272.818	-144.26			265.711	-28.4399			279.347	-18.53													175.879	2.81648			175.438	-19.7629			176.617	-23.2995
									273.223	-145.476			266.258	-28.3316			279.806	-18.4924													176.276	2.88822			176.033	-20.3301			176.985	-24.3583
									273.727	-146.839			266.736	-27.9225			280.235	-18.3386													176.832	3.18421			176.544	-20.3973			177.341	-25.4121
									274.293	-148.379			267.187	-27.3445			280.846	-18.0535													177.216	3.60667			177.093	-19.9668			177.892	-26.185
									274.694	-150.056			267.693	-26.7127			281.152	-17.5932													177.959	3.94906			177.414	-19.2312			178.348	-26.5075
									275.111	-151.791			268.185	-26.1867			281.856	-16.9626													178.324	4.0539			178.185	-18.4207			178.968	-26.3592
									275.506	-153.47			268.925	-25.8515			282.194	-16.195													178.93	3.88296			178.542	-17.7617			179.39	-25.8199
									276.152	-154.997			269.064	-25.7273			282.784	-15.3651													179.062	3.4832			179.056	-17.4381			179.865	-25.0431
									276.529	-156.3			269.767	-25.7778			283.266	-14.5415													179.897	2.98605			179.681	-17.5038			180.354	-24.2211
									276.963	-157.464			270.116	-25.859			283.856	-13.7632													180.113	2.45051			179.903	-17.8987			180.979	-23.5723
									277.475	-158.585			270.625	-25.8809			284.246	-13.0852													180.712	1.85945			180.561	-18.5166			181.465	-23.2204
									278.105	-159.735			271.139	-25.7427			284.631	-12.5135													181.236	1.1359			180.846	-19.1972			181.847	-23.1867
									278.452	-160.983			271.535	-25.5174			285.262	-12.1361													181.878	0.23888			181.567	-19.8385			182.378	-23.4061
									278.963	-162.258			272.258	-25.3071			285.86	-11.99													182.111	-0.80507			181.812	-20.3714			182.912	-23.7519
									279.355	-163.355			272.62	-25.2066			286.307	-12.0902													182.547	-1.91139			182.439	-20.7892			183.191	-24.0503
									279.799	-164.021			273.161	-25.2618			286.646	-12.4313													183.071	-2.85809			183.014	-21.1417			183.752	-24.2379
									280.247	-164.005			273.675	-25.3917			287.149	-12.8981													183.543	-3.6152			183.235	-21.448			184.314	-24.2968
									281.004	-163.196			273.865	-25.4095			287.636	-13.4628													184.137	-4.12978			183.9	-21.8031			184.949	-24.3219
									281.203	-161.591			274.64	-25.1902			288.193	-14.033													184.606	-4.54475			184.428	-22.25			185.214	-24.387
									281.705	-159.411			274.851	-24.6476			288.599	-14.5875													185.064	-4.86994			184.75	-22.813			185.735	-24.4951
									282.566	-157.01			275.782	-23.8716			289.3	-15.0855													185.41	-5.17551			185.464	-23.4977			186.277	-24.5855
									283.024	-154.758			276.011	-22.9728			289.428	-15.4508													186.13	-5.39388			185.737	-24.172			186.747	-24.5427
									283.459	-152.96			276.499	-22.1536			290.057	-15.6146													186.521	-5.44166			186.242	-24.7513			187.135	-24.2934
									283.947	-151.771			277.186	-21.5641			290.528	-15.5341													186.809	-5.22143			186.649	-25.0742			187.724	-23.8299
									284.407	-151.185			277.539	-21.2288			291.041	-15.2043													187.611	-4.73751			187.23	-25.1083			188.158	-23.2569
									284.958	-151.098			278.05	-21.18			291.718	-14.7217													187.865	-4.07779			187.821	-24.8494			188.802	-22.7708
									285.335	-151.374			278.474	-21.353			291.913	-14.1529													188.563	-3.32387			188.168	-24.289			189.236	-22.5632
									285.925	-151.882			279.062	-21.6849			292.611	-13.557													188.982	-2.57779			188.797	-23.4729			189.694	-22.7829
									286.388	-152.471			279.527	-22.127			293.102	-12.9146													189.561	-1.87598			189.161	-22.3595			190.279	-23.4168
									286.77	-153.127			279.824	-22.5647			293.439	-12.2063													189.903	-1.18428			189.603	-21.0227			190.602	-24.3912
									287.339	-153.856			280.639	-22.9673			294.009	-11.4459													190.395	-0.45015			190.298	-19.5807			191.08	-25.5053
									287.711	-154.695			280.851	-23.2378			294.578	-10.6687													190.935	0.32353			190.723	-18.2245			191.581	-26.5351
									288.348	-155.762			281.285	-23.4597			295.018	-10.0339													191.482	1.09032			191.374	-17.2107			192.097	-27.2756
									288.833	-157.148			281.994	-23.6995			295.673	-9.5883													192.059	1.68402			191.87	-16.6451			192.456	-27.6746
									289.286	-158.854			282.41	-24.0744			295.944	-9.43547													192.362	1.87476			192.193	-16.5512			193.01	-27.7672
									289.596	-160.75			283.027	-24.7075			296.587	-9.55217													192.98	1.59768			192.691	-16.7536			193.573	-27.6898
									290.085	-162.643			283.323	-25.6135			296.893	-9.86542													193.523	0.8028			193.087	-17.0556			194.017	-27.6243
									290.668	-164.271			283.786	-26.7458			297.503	-10.3911													193.892	-0.36392			193.836	-17.2783			194.628	-27.683
									291.012	-165.354			284.245	-27.9501			297.939	-11.0285													194.333	-1.67626			193.988	-17.2965			195.025	-27.9041
									291.53	-165.706			284.772	-29.0894			298.512	-11.7637													194.723	-2.82751			194.719	-17.1823			195.427	-28.1972
									292.012	-165.27			285.386	-30.0789			298.949	-12.5375													195.273	-3.605			195.197	-17.0184			195.83	-28.4311
									292.476	-164.129			285.53	-30.7964			299.213	-13.1794													195.829	-3.88986			195.543	-16.9794			196.538	-28.5039
									293.032	-162.524			286.239	-31.2175			300.032	-13.551													196.29	-3.71254			196.273	-17.2179			196.952	-28.3672
									293.598	-160.752			286.718	-31.2824			300.158	-13.5453													196.648	-3.20184			196.598	-17.768			197.355	-28.0623
									294.34	-159.164			287.16	-30.9511			300.815	-13.1416													197.321	-2.6043			197.24	-18.5753			197.991	-27.7332
									294.528	-158.009			287.679	-30.2462			301.439	-12.4499													197.874	-2.18481			197.426	-19.4656			198.332	-27.5413
									295.005	-157.446			288.066	-29.1649			301.699	-11.6351													198.292	-2.14104			197.934	-20.2639			199.006	-27.6103
									295.631	-157.496			288.729	-27.8346			302.595	-10.938													198.73	-2.56713			198.617	-20.8747			199.475	-28.0327
									296.161	-158.056			289.234	-26.3992			302.837	-10.5094													199.278	-3.42849			198.789	-21.2538			199.851	-28.751
									296.623	-158.946			289.729	-24.9871			303.159	-10.4633													199.707	-4.56811			199.697	-21.5579			200.372	-29.606
									296.897	-159.887			290.239	-23.7502			303.976	-10.7309													200.148	-5.83435			200.004	-21.8788			200.725	-30.392
									297.353	-160.643			290.625	-22.699			304.338	-11.2125													200.544	-7.02063			200.435	-22.2775			201.255	-30.9187
									297.99	-161.03			291.332	-21.8897			304.793	-11.8117													201.22	-7.9941			200.972	-22.7379			201.794	-31.1191
									298.416	-160.966			291.733	-21.2301			305.07	-12.3252													201.541	-8.67374			201.297	-23.1103			202.263	-31.0709
									298.977	-160.505			292.045	-20.6646			305.704	-12.7171													202.108	-9.04965			201.98	-23.2959			202.73	-30.9687
									299.478	-159.669			292.778	-20.1301			306.319	-12.95													202.572	-9.1374			202.345	-23.2085			203.373	-30.9986
									299.956	-158.528			293.187	-19.593			306.77	-13.0205													202.983	-8.91447			202.787	-22.978			203.797	-31.3383
									300.358	-157.113			293.587	-19.1181			307.24	-12.977													203.556	-8.47724			203.464	-22.7349			204.212	-32.0222
									300.879	-155.431			294.311	-18.7617			307.435	-12.7841													204.193	-7.87518			203.904	-22.6254			204.699	-32.9592
									301.579	-153.578			294.57	-18.6033			308.264	-12.4804													204.448	-7.15769			204.459	-22.8021			205.101	-34.0087
									301.937	-151.734			295.279	-18.6892			308.787	-12.1429													205.049	-6.33986			204.873	-23.2254			205.774	-34.9319
									302.473	-150.12			295.603	-18.9497			309.062	-11.8265													205.542	-5.44855			205.226	-23.8247			206.068	-35.5518
									303.114	-148.994			296.184	-19.296			309.726	-11.6608													206.071	-4.49914			205.729	-24.4332			206.508	-35.7249
									303.481	-148.509			296.493	-19.5175			310.167	-11.6867													206.576	-3.52379			206.29	-24.8727			207.029	-35.471
									304.002	-148.822			297.007	-19.4994			310.647	-11.9503													206.854	-2.63538			206.958	-25.0391			207.625	-34.965
									304.513	-149.995			297.621	-19.2296			311.103	-12.3955													207.733	-1.94837			207.047	-24.8171			208.178	-34.4789
									304.886	-151.962			298.041	-18.7582			311.6	-12.9584													208.017	-1.61965			207.668	-24.2504			208.623	-34.2577
									305.461	-154.632			298.604	-18.2432			312.066	-13.5638													208.567	-1.74381			208.242	-23.4214			209.212	-34.4611
									305.887	-157.781			299.144	-17.8569			312.527	-14.1275													208.983	-2.32365			208.845	-22.4553			209.514	-35.0404
									306.146	-161.129			299.52	-17.683			313.047	-14.6758													209.56	-3.21587			209.36	-21.5404			210.015	-35.8448
									306.729	-164.397			300.12	-17.7867			313.58	-15.1221													209.884	-4.24936			209.682	-20.7717			210.387	-36.7215
									307.044	-167.345			300.406	-18.1767			313.889	-15.4623													210.433	-5.22366			210.226	-20.194			211.034	-37.5285
									307.724	-169.764			301.096	-18.8076			314.525	-15.7499													210.834	-5.99737			210.749	-19.7884			211.509	-38.286
									308.073	-171.571			301.524	-19.5997			314.958	-15.989													211.356	-6.47227			211.197	-19.541			211.955	-39.0209
									308.389	-172.794			301.967	-20.432			315.522	-16.2123													211.976	-6.61428			211.876	-19.4047			212.477	-39.7662
									309.139	-173.57			302.424	-21.1481			315.899	-16.4442													212.347	-6.52846			212.091	-19.3008			212.933	-40.4652
									309.428	-174.118			302.839	-21.5785			316.424	-16.6846													212.84	-6.16161			212.664	-19.2232			213.231	-41.0433
									310.091	-174.68			303.324	-21.6232			317.031	-16.8974													213.258	-5.66485			213.278	-19.1359			213.905	-41.44
									310.733	-175.425			303.87	-21.2696			317.19	-17.0443													213.835	-5.12343			213.595	-19.0568			214.39	-41.6285
									310.899	-176.408			304.563	-20.6006			317.947	-17.1719													214.495	-4.70739			214.138	-19.0658			214.814	-41.6581
									311.268	-177.588			304.758	-19.7778			318.461	-17.3246													214.89	-4.46577			214.662	-19.2465			215.397	-41.5592
									312.024	-178.88			305.438	-18.9336			318.806	-17.5438													215.223	-4.43371			215.326	-19.6993			215.782	-41.343
									312.387	-180.132			305.874	-18.2599			319.35	-17.8941													215.809	-4.55831			215.58	-20.3942			216.357	-40.9845
									312.921	-181.215			306.476	-17.8039			319.917	-18.3429													216.398	-4.73137			216.023	-21.2575			216.728	-40.4526
									313.336	-181.993			306.923	-17.5987			320.31	-18.794													216.551	-4.8726			216.535	-22.1608			217.31	-39.7283
									313.73	-182.301			307.322	-17.6078			320.669	-19.0969													217.448	-4.95955			217.037	-22.9306			217.792	-38.8488
									314.29	-181.902			307.834	-17.749			321.206	-19.1507													217.717	-4.99225			217.529	-23.5204			218.356	-37.8724
									314.798	-180.515			308.335	-17.9658			321.925	-18.8659													218.304	-5.00168			218.041	-23.8821			218.819	-36.9124
									315.318	-177.88			308.798	-18.1888			322.163	-18.1655													218.586	-5.01735			218.422	-23.995			219.276	-36.0358
									315.892	-173.808			309.303	-18.4276			322.661	-17.1571													219.277	-5.06241			218.988	-23.92			219.755	-35.3166
									315.969	-168.412			309.921	-18.6563			323.345	-15.8529													219.82	-5.1218			219.395	-23.7157			220.406	-34.8271
									316.974	-162.151			310.149	-18.9021			323.827	-14.3592													220.098	-5.15809			220.088	-23.5241			220.797	-34.5906
									317.663	-155.732			310.777	-19.128			324.204	-12.7563													220.694	-5.1242			220.444	-23.3857			221.223	-34.6175
									318.336	-150.034			311.269	-19.3004			324.79	-11.1698													221.243	-4.90611			220.915	-23.3913			221.822	-34.8577
									318.963	-145.714			311.733	-19.3871			325.385	-9.72429													221.509	-4.43615			221.545	-23.538			222.234	-35.2155
									319.097	-143.072			312.232	-19.3939			325.735	-8.56938													222.154	-3.83124			221.868	-23.7539			222.726	-35.5522
									319.725	-141.978			312.575	-19.4101			326.272	-7.87428													222.663	-3.17137			222.312	-23.9852			223.167	-35.7696
									320.064	-142.051			313.312	-19.525			327.09	-7.68797													223.255	-2.68256			222.885	-24.1876			223.639	-35.8355
									320.61	-142.847			313.722	-19.8491			327.201	-7.92526													223.717	-2.44401			223.393	-24.3705			224.17	-35.8274
									321.127	-144.085			314.21	-20.4439			327.798	-8.39903													224.118	-2.51535			224.018	-24.5593			224.707	-35.8886
									321.567	-145.601			314.682	-21.2659			328.026	-8.85105													224.588	-2.79752			224.167	-24.7106			225.246	-36.1416
									322.098	-147.435			315.045	-22.179			328.75	-9.11589													224.976	-3.1823			224.906	-24.8046			225.75	-36.6038
									322.475	-149.576			315.56	-23.0721			329.169	-9.15449													225.638	-3.57346			225.296	-24.7743			226.034	-37.2176
									323.012	-151.997			316.041	-23.7976			329.699	-9.10648													226.184	-3.91123			225.71	-24.61			226.511	-37.8424
									323.383	-154.634			316.616	-24.3132			330.338	-9.13238													226.512	-4.13592			226.338	-24.3996			227.046	-38.3913
									323.902	-157.343			316.963	-24.599			330.665	-9.32702													227.015	-4.21709			226.789	-24.2723			227.602	-38.8542
									324.262	-160.043			317.564	-24.7021			331.207	-9.74167													227.377	-4.1332			227.398	-24.4166			228.121	-39.2888
									324.843	-162.612			318.029	-24.6614			331.519	-10.2932													228.095	-3.88417			227.775	-24.9116			228.565	-39.7766
									325.187	-164.999			318.444	-24.4756			332.059	-10.8074													228.573	-3.55318			228.189	-25.7906			228.967	-40.3585
									325.703	-167.121			319.025	-24.1554			332.746	-11.2278													229.051	-3.20543			228.823	-26.9551			229.491	-41.0017
									326.242	-168.912			319.522	-23.681			333.018	-11.4783													229.366	-2.94424			229.167	-28.1935			229.975	-41.6708
									326.572	-170.367			319.9	-23.0942			333.564	-11.5837													230.055	-2.76285			229.51	-29.4003			230.394	-42.3082
									327.1	-171.521			320.505	-22.5026			333.992	-11.5147													230.504	-2.66229			230.149	-30.3945			231.066	-42.8462
									327.53	-172.486			320.911	-21.9944			334.556	-11.303													230.935	-2.5611			230.641	-31.1365			231.371	-43.2234
									328.14	-173.413			321.647	-21.7012			335.199	-10.9821													231.505	-2.33932			231.106	-31.6446			231.86	-43.3371
									328.695	-174.44			321.97	-21.5961			335.429	-10.5692													231.818	-1.95756			231.449	-31.9173			232.372	-43.1137
									329.105	-175.59			322.494	-21.6094			335.912	-10.1478													232.48	-1.36972			232.25	-31.9283			232.85	-42.5147
									329.372	-176.854			322.846	-21.5371			336.593	-9.8252													232.853	-0.6719			232.464	-31.6412			233.329	-41.6196
									329.89	-178.113			323.251	-21.1684			337.115	-9.7234													233.548	0.0442			232.904	-31.0502			233.973	-40.588
									330.545	-179.254			323.979	-20.4664			337.57	-9.90375													233.879	0.63699			233.624	-30.2669			234.407	-39.6533
									330.994	-180.13			324.454	-19.4961			337.923	-10.3139													234.522	1.03373			233.925	-29.4488			234.903	-39.032
									331.37	-180.662			324.831	-18.5099			338.488	-10.8378													234.908	1.203			234.705	-28.8255			235.402	-38.8648
									331.87	-180.768			325.585	-17.81			338.936	-11.2345													235.301	1.21098			235.219	-28.5328			235.898	-39.2733
									332.273	-180.38			325.89	-17.638			339.327	-11.3294													235.931	1.09983			235.533	-28.5196			236.426	-40.175
									332.842	-179.515			326.585	-18.1191			339.866	-11.0385													236.314	0.8226			235.841	-28.6037			236.773	-41.4631
									333.558	-178.213			326.868	-19.1175			340.461	-10.3875													236.935	0.33882			236.455	-28.5957			237.296	-42.9596
									333.903	-176.555			327.22	-20.4536			340.869	-9.5799													237.354	-0.42523			236.906	-28.3855			237.687	-44.4791
									334.268	-174.676			327.89	-21.8645			341.45	-8.86127													237.873	-1.42402			237.563	-27.9935			238.217	-45.8781
									334.822	-172.723			328.135	-23.1352			342.043	-8.39742													238.284	-2.51534			238.005	-27.6268			238.687	-47.0849
									335.684	-170.76			328.794	-24.2003			342.452	-8.26177													238.715	-3.43075			238.559	-27.4913			239.149	-48.056
									335.962	-168.758			329.217	-25.0532			342.779	-8.43951													239.154	-3.97465			238.931	-27.6869			239.795	-48.7579
									336.432	-166.543			329.81	-25.7611			343.408	-8.80797													239.649	-4.02934			239.435	-28.2441			239.958	-49.207
									336.904	-163.95			330.19	-26.4047			343.848	-9.20946													240.288	-3.67147			239.946	-28.9713			240.591	-49.3993
									337.289	-160.865			330.536	-26.9871			344.279	-9.54469													240.702	-3.11001			240.455	-29.7211			241.152	-49.3908
									337.917	-157.443			331.295	-27.5001			344.853	-9.77355													241.267	-2.56703			240.678	-30.3205			241.63	-49.246
									338.703	-154.085			331.649	-27.847			345.334	-9.89011													241.805	-2.20781			241.35	-30.6489			242.098	-49.0158
									339.246	-151.291			332.002	-28.0035			345.707	-9.91866													242.15	-2.10229			241.879	-30.7001			242.6	-48.7405
									339.682	-149.544			332.652	-27.9443			346.297	-9.90944													242.65	-2.21973			242.329	-30.5227			243.056	-48.3991
									340.187	-149.045			333.085	-27.6753			346.92	-9.84121													243.178	-2.44963			242.85	-30.2568			243.458	-47.9588
									340.469	-149.649			333.59	-27.2907			347.159	-9.65622													243.682	-2.73421			243.284	-30.0307			244.167	-47.4043
									341.109	-150.999			334.134	-26.8487			347.697	-9.29338													244.141	-3.02604			243.688	-29.9352			244.507	-46.775
									341.416	-152.7			334.665	-26.3906			348.273	-8.72491													244.593	-3.36817			244.619	-30.009			245.102	-46.0634
									341.923	-154.343			335.012	-25.9363			348.7	-7.95494													245.11	-3.81042			244.732	-30.171			245.533	-45.3676
									342.409	-155.609			335.514	-25.4624			349.196	-7.1222													245.564	-4.39553			245.073	-30.2798			245.958	-44.7262
									342.904	-156.26			336.156	-24.9848			349.826	-6.41282													246.257	-5.0945			245.787	-30.1968			246.664	-44.2215
									343.45	-156.143			336.506	-24.4422			350.34	-6.02098													246.523	-5.78262			246.104	-29.9592			246.969	-43.978
									343.704	-155.219			337.129	-23.8209			350.705	-6.03925													246.902	-6.27957			246.894	-29.678			247.555	-44.0876
									344.171	-153.618			337.563	-23.1269			351.262	-6.42086													247.504	-6.38504			247.191	-29.5845			248.069	-44.5624
									345.118	-151.635			337.981	-22.361			351.732	-7.00003													247.926	-5.99269			247.802	-29.9234			248.565	-45.3336
									345.577	-149.568			338.442	-21.6349			352.086	-7.53528													248.577	-5.12727			248.302	-30.791			248.866	-46.2298
									345.951	-147.737			339.186	-21.0982			352.527	-7.85921													248.985	-3.92401			248.648	-32.1566			249.417	-46.981
									346.437	-146.246			339.585	-20.9219			353.15	-7.92932													249.55	-2.61662			249.076	-33.913			249.799	-47.429
									346.854	-145.105			340.161	-21.196			353.624	-7.77931													249.937	-1.43931			249.561	-35.7121			250.397	-47.4536
									347.447	-144.238			340.45	-21.9354			354.258	-7.59857													250.597	-0.58938			250.13	-37.383			250.96	-47.105
									348.012	-143.607			340.957	-22.993			354.593	-7.53862													251.149	-0.18825			250.44	-38.7199			251.339	-46.5425
									348.446	-143.241			341.448	-24.0865			355.014	-7.70691													251.425	-0.1837			250.957	-39.6045			251.858	-45.8918
									348.91	-143.13			341.903	-24.994			355.655	-8.21286													252.006	-0.44084			251.465	-40.0796			252.491	-45.3115
									349.345	-143.281			342.422	-25.4868			356.095	-9.09858													252.451	-0.78249			251.874	-40.2192			252.883	-44.8175
									350.074	-143.552			342.759	-25.5095			356.534	-10.337													252.856	-1.07104			252.581	-40.2852			253.336	-44.3744
									350.354	-143.686			343.312	-25.1665			357.107	-11.826													253.423	-1.28931			253.106	-40.434			253.882	-43.8764
									350.702	-143.433			343.897	-24.6991			357.371	-13.3741													253.911	-1.51377			253.204	-40.8569			254.212	-43.3248
									351.211	-142.646			344.586	-24.3577			358.022	-14.7699													254.523	-1.89793			254.155	-41.6288			254.873	-42.782
									351.851	-141.338			344.919	-24.3434			358.206	-15.7672													254.982	-2.45127			254.296	-42.7097			255.41	-42.4295
									352.477	-139.752			345.286	-24.6659			358.808	-16.2514													255.336	-3.12081			254.925	-44.014			255.868	-42.438
									352.873	-138.2			345.898	-25.2351			359.531	-16.2169													255.716	-3.71267			255.315	-45.3378			256.45	-42.878
									353.483	-137.04			346.179	-25.7974			359.811	-15.7706													256.297	-3.99905			255.729	-46.5258			256.78	-43.6596
									353.814	-136.5			346.791	-26.1889			360.354	-15.1054													256.861	-3.90301			256.363	-47.4375			257.245	-44.5503
									354.479	-136.656			347.275	-26.3105			360.888	-14.3443													257.249	-3.46741			256.51	-48.0251			257.578	-45.2568
									354.865	-137.482			347.748	-26.2172			361.38	-13.6107													257.849	-2.83818			257.414	-48.3442			258.236	-45.6428
									355.305	-138.775			348.26	-26.0749			361.971	-12.9426													258.368	-2.20031			257.719	-48.4309			258.715	-45.6722
									355.753	-140.34			348.756	-26.0942			362.252	-12.3608													258.732	-1.65426			258.209	-48.3325			259.233	-45.4434
									356.265	-141.938			349.322	-26.4074			362.847	-11.8591													259.408	-1.28378			258.822	-48.1252			259.752	-45.132
									356.631	-143.405			349.858	-26.9994			363.385	-11.4158													259.79	-1.02039			259.042	-47.7058			260.215	-44.8504
									357.27	-144.643			350.048	-27.754			363.825	-11.0899													260.13	-0.80157			259.682	-47.0544			260.616	-44.697
									357.55	-145.63			350.742	-28.4444			364.454	-10.8193													260.775	-0.6276			260.21	-46.1181			261.154	-44.7027
									358.133	-146.478			350.975	-28.8193			364.748	-10.5131													261.369	-0.51645			260.771	-44.9521			261.696	-44.8336
									358.751	-147.278			351.617	-28.7685			365.316	-10.0731													261.737	-0.47698			261.182	-43.6598			262.301	-45.0386
									359.099	-148.218			352.111	-28.3066			365.698	-9.42717													262.192	-0.53398			261.572	-42.334			262.503	-45.2137
									359.595	-149.364			352.733	-27.615			366.369	-8.60036													262.689	-0.71361			262.321	-41.1709			263.059	-45.2574
									359.959	-150.835			353.086	-26.9202			366.675	-7.71263													263.327	-0.9934			262.887	-40.2055			263.546	-45.0923
									360.647	-152.655			353.646	-26.3978			367.458	-6.92629													263.54	-1.36528			263.172	-39.4623			264.098	-44.7397
									361.049	-154.826			354.234	-26.145			367.995	-6.43229													264.197	-1.81569			263.631	-38.8937			264.711	-44.3073
									361.413	-157.251			354.611	-26.1057			368.13	-6.36438													264.808	-2.27568			264.156	-38.3665			265.048	-43.8917
									361.927	-159.818			355.054	-26.106			368.79	-6.7445													265.071	-2.66843			264.784	-37.8352			265.555	-43.6094
									362.262	-162.341			355.491	-26.0274			369.232	-7.55405													265.491	-2.94328			265.164	-37.1991			266.091	-43.4845
									362.899	-164.67			356.035	-25.766			369.876	-8.69095													266.13	-3.05286			265.64	-36.4689			266.591	-43.5112
									363.157	-166.723			356.619	-25.382			370.297	-10.0074													266.62	-3.00913			266.266	-35.632			266.986	-43.6698
									363.866	-168.473			357.039	-24.9915			370.553	-11.2473													267.095	-2.92633			266.6	-34.7572			267.533	-43.912
									364.142	-169.927			357.569	-24.7686			370.998	-12.1941													267.627	-2.94929			267.159	-33.9121			268.013	-44.2822
									364.726	-171.156			358.194	-24.7788			371.572	-12.6451													268.019	-3.2013			267.774	-33.1714			268.531	-44.7846
									365.162	-172.236			358.511	-25.0313			372.207	-12.6765													268.576	-3.70327			268.19	-32.5738			268.917	-45.426
									365.721	-173.192			358.909	-25.3288			372.504	-12.4118													269.057	-4.46081			268.746	-32.1337			269.565	-46.1759
									366.102	-174.069			359.506	-25.4191			373.135	-12.1281													269.568	-5.346			269.028	-31.7881			269.833	-46.9609
									366.513	-174.927			359.961	-25.1359			373.744	-12.0925													269.945	-6.12492			269.753	-31.4264			270.431	-47.7075
									367.216	-175.878			360.352	-24.4146			374.137	-12.359													270.356	-6.61358			270.045	-30.9315			270.879	-48.3194
									367.59	-177.082			360.922	-23.3896			374.515	-12.9117													270.923	-6.64431			270.692	-30.2622			271.311	-48.7324
									367.913	-178.645			361.576	-22.2629			374.992	-13.5658													271.462	-6.13281			271.042	-29.446			271.903	-48.8921
									368.73	-180.661			362.09	-21.2687			375.382	-14.1815													271.904	-5.17644			271.716	-28.5773			272.32	-48.815
									369.041	-183.013			362.659	-20.5749			376.142	-14.6836													272.396	-3.98286			272.131	-27.8269			272.798	-48.547
									369.374	-185.508			362.761	-20.2036			376.373	-15.0901													273.005	-2.81412			272.667	-27.334			273.313	-48.178
									369.746	-187.85			363.39	-20.121			377.127	-15.4295													273.538	-1.88192			273.18	-27.2389			273.878	-47.7609
									370.255	-189.775			364.067	-20.3236			377.409	-15.6947													273.938	-1.33073			273.629	-27.5825			274.34	-47.3657
									370.899	-191.181			364.474	-20.8003			377.805	-15.9081													274.509	-1.13338			274.125	-28.3061			274.808	-46.9749
									371.282	-192.086			365.012	-21.5468			378.532	-16.0673													274.842	-1.1587			274.572	-29.2811			275.301	-46.5644
									371.747	-192.709			365.288	-22.507			378.82	-16.1307													275.335	-1.26409			275.004	-30.271			275.682	-46.1053
									372.292	-193.273			365.908	-23.5582			379.458	-16.1614													275.948	-1.34663			275.494	-31.1792			276.301	-45.5888
									372.75	-194.036			366.321	-24.5365			379.877	-16.1881													276.385	-1.3041			275.901	-31.8566			276.865	-45.0644
									373.303	-195.222			366.682	-25.2996			380.443	-16.2566													276.86	-1.18573			276.416	-32.3313			277.317	-44.5526
									373.771	-196.863			367.352	-25.8327			380.781	-16.3879													277.264	-1.08623			277.171	-32.5961			277.671	-44.0801
									374.129	-198.92			367.809	-26.1437			381.294	-16.5614													277.992	-1.11564			277.417	-32.6468			278.291	-43.6439
									374.707	-201.184			368.184	-26.3639			381.941	-16.802													278.283	-1.35089			277.906	-32.4456			278.76	-43.2549
									374.93	-203.304			368.86	-26.6047			382.391	-17.0104													278.85	-1.84285			278.257	-31.9066			279.187	-42.8888
									375.622	-204.832			369.265	-26.884			382.618	-17.1964													279.385	-2.55943			278.857	-31.0913			279.823	-42.6047
									375.926	-205.395			369.664	-27.2653			383.373	-17.3528													279.753	-3.36204			279.646	-30.1172			280.195	-42.4718
									376.377	-204.722			370.175	-27.6733			383.68	-17.4795													280.054	-4.1733			279.814	-29.1913			280.744	-42.5307
									376.889	-202.853			370.722	-28.0786			384.346	-17.6702													280.884	-4.87202			280.602	-28.4574			281.187	-42.8066
									377.497	-200.007			371.277	-28.376			384.747	-17.9899													281.231	-5.4516			280.93	-27.9543			281.724	-43.213
									378.252	-196.602			371.509	-28.4941			385.34	-18.498													281.637	-5.88401			281.369	-27.6534			282.203	-43.6372
									378.724	-193.051			372.096	-28.4345			385.684	-19.1267													282.181	-6.1564			281.864	-27.5109			282.636	-43.89
									379.122	-189.6			372.679	-28.2383			386.021	-19.7655													282.769	-6.24104			282.218	-27.5288			282.918	-43.8867
									379.566	-186.371			373.045	-28.0685			386.831	-20.2779													283.085	-6.03274			283.103	-27.8643			283.674	-43.6165
									380.276	-183.374			373.839	-28.1213			387.082	-20.5201													283.549	-5.51535			283.434	-28.6397			284.177	-43.1955
									380.538	-180.701			374.026	-28.5017			387.552	-20.4452													284.219	-4.71107			283.955	-29.9187			284.629	-42.8154
									381.398	-178.423			374.689	-29.2552			388.096	-20.1192													284.56	-3.71298			284.221	-31.5214			285.156	-42.5719
									381.714	-176.702			375.027	-30.256			388.691	-19.5972													285.348	-2.66538			284.708	-33.0575			285.593	-42.5472
									382.375	-175.679			375.482	-31.3406			389.209	-19.0943													285.545	-1.77449			285.2	-34.1809			286.151	-42.6082
									382.799	-175.364			375.967	-32.3469			389.546	-18.7014													286.182	-1.08311			285.592	-34.5319			286.398	-42.5201
									383.038	-175.649			376.429	-33.1679			390.106	-18.5523													286.66	-0.7198			286.114	-34.059			287.103	-42.0027
									383.663	-176.409			377.031	-33.8265			390.684	-18.6486													287.118	-0.73783			286.705	-32.8532			287.557	-40.8015
									384.274	-177.564			377.436	-34.3646			391.088	-18.9595													287.652	-1.18025			287.247	-31.2175			287.949	-38.8042
									384.7	-179.05			377.922	-34.8506			391.6	-19.4028													288.151	-1.98648			287.892	-29.5386			288.439	-36.1778
									384.994	-180.811			378.478	-35.3344			391.965	-19.7463													288.586	-3.05605			288.189	-28.0293			289.022	-33.2141
									385.577	-182.763			378.746	-35.8136			392.438	-19.8594													289.028	-4.16462			288.734	-26.8892			289.939	-30.3881
									386.147	-184.866			379.466	-36.2752			393.172	-19.5955													289.53	-5.02885			289.34	-26.147			290.221	-28.1092
									386.368	-187.003			379.901	-36.6349			393.302	-18.9225													289.795	-5.44277			289.699	-25.7921			290.694	-26.5708
									386.819	-189.198			380.304	-36.8237			394.05	-17.9483													290.56	-5.26747			290.328	-25.7387			291.191	-25.6826
									387.582	-191.437			380.773	-36.7165			394.472	-16.8612													290.928	-4.59175			290.515	-25.8932			291.53	-25.1573
									387.994	-193.727			381.261	-36.2797			395.154	-15.9299													291.547	-3.60782			291.358	-26.1678			292.066	-24.7314
									388.248	-196.056			381.842	-35.5248			395.623	-15.3553													291.969	-2.54036			291.749	-26.4369			292.668	-24.1779
									388.696	-198.336			382.265	-34.4961			395.931	-15.2384													292.557	-1.60721			291.958	-26.6298			293.027	-23.4799
									389.326	-200.403			382.948	-33.3819			396.596	-15.5886													292.99	-0.89668			292.682	-26.7339			293.726	-22.762
									389.721	-202.131			383.247	-32.3189			396.851	-16.3451													293.52	-0.37398			293.123	-26.7704			294.157	-22.1462
									390.132	-203.469			383.881	-31.4062			397.469	-17.453													293.904	0.00178			293.685	-26.8424			294.625	-21.7462
									390.739	-204.32			384.384	-30.7234			398.038	-18.7971													294.438	0.28121			294.144	-27.0403			295.01	-21.549
									391.097	-204.577			384.743	-30.1646			398.362	-20.2534													294.93	0.51943			294.664	-27.3579			295.63	-21.5668
									391.645	-204.143			385.463	-29.6606			398.861	-21.7049													295.539	0.63223			295.048	-27.7697			296.123	-21.7357
									392.14	-202.929			385.668	-29.1054			399.256	-22.9298													295.911	0.64789			295.413	-28.1246			296.498	-22.0027
									392.619	-200.917			386.117	-28.51			399.731	-23.8286													296.485	0.56625			296.131	-28.3634			297.073	-22.326
									392.966	-198.295			386.993	-27.9845			400.232	-24.3344													296.826	0.47426			296.564	-28.3901			297.54	-22.6947
									393.743	-195.482			387.274	-27.6871			400.821	-24.5484													297.288	0.43004			296.947	-28.2432			297.895	-23.0835
									394.471	-192.937			387.895	-27.8091			401.303	-24.6657													297.993	0.45287			297.474	-28.0447			298.549	-23.5082
									394.837	-191.075			388.362	-28.3127			401.631	-24.8462													298.356	0.47734			298.073	-27.9011			299.049	-23.8921
									395.32	-190.143			388.583	-29.0934			402.446	-25.25													298.772	0.45403			298.505	-28.003			299.492	-24.17
									395.708	-190.085			389.282	-29.9148			402.719	-25.86													299.502	0.27411			299.087	-28.4347			299.804	-24.211
									396.153	-190.681			389.528	-30.5561			403.089	-26.4838													299.801	-0.06058			299.407	-29.2465			300.377	-23.9676
									396.683	-191.7			390.209	-30.9259			403.703	-26.9761													300.297	-0.48933			299.983	-30.328			300.871	-23.4329
									397.171	-192.927			390.653	-30.9536			404.016	-27.154													300.745	-0.8871			300.392	-31.494			301.539	-22.7109
									397.679	-194.305			391.17	-30.7379			404.647	-27.0282													301.267	-1.15959			300.895	-32.5582			301.951	-22.0016
									397.986	-195.832			391.75	-30.4136			405.092	-26.687													301.816	-1.21337			301.211	-33.3069			302.416	-21.4458
									398.71	-197.466			391.924	-30.0596			405.694	-26.4016													302.226	-1.00873			301.732	-33.7349			302.865	-21.1645
									399.164	-199.031			392.694	-29.7981			406.302	-26.3587													302.634	-0.56518			302.459	-33.9176			303.479	-21.1712
									399.333	-200.163			393.239	-29.6678			406.594	-26.6708													303.365	0.08279			302.795	-33.9677			303.857	-21.4326
									399.96	-200.515			393.681	-29.6628			406.929	-27.3218													303.702	0.81598			303.448	-33.9501			304.437	-21.8418
									400.345	-199.859			394.074	-29.6998			407.78	-28.0563													304.198	1.48778			303.7	-33.8752			304.775	-22.3009
									400.763	-198.214			394.362	-29.6621			407.932	-28.6311													304.765	1.99819			304.196	-33.711			305.28	-22.7263
									401.612	-195.974			395.107	-29.4888			408.498	-28.7999													305.298	2.2221			304.728	-33.4519			305.855	-23.0703
									402.183	-193.71			395.668	-29.1465			408.767	-28.4017													305.752	2.1146			305.18	-33.145			306.254	-23.3911
									402.619	-192.011			396.079	-28.6405			409.688	-27.4871													306.128	1.69361			306.039	-32.9377			306.841	-23.772
									403.189	-191.254			396.511	-28.0058			409.94	-26.1445													306.683	1.08546			306.249	-32.9042			307.176	-24.3814
									403.456	-191.583			397.018	-27.2467			410.625	-24.6051													307.189	0.41312			306.635	-33.0938			307.905	-25.3484
									404.055	-192.795			397.553	-26.4545			411.08	-23.056													307.638	-0.19279			307.148	-33.4956			308.211	-26.7208
									404.505	-194.559			397.922	-25.7202			411.429	-21.6277													308.051	-0.67969			307.733	-34.0171			308.749	-28.4028
									404.782	-196.54			398.736	-25.2092			412.114	-20.4826													308.556	-0.96738			308.294	-34.6376			309.076	-30.2256
									405.474	-198.402			399.098	-25.0319			412.56	-19.7154													309.12	-1.11913			308.567	-35.2784			309.576	-31.9622
									405.787	-199.995			399.578	-25.213			413.134	-19.3286													309.656	-1.20099			309.127	-35.8936			310.07	-33.4627
									406.269	-201.282			399.902	-25.711			413.627	-19.3138													310.071	-1.22425			309.694	-36.4152			310.486	-34.6197
									406.802	-202.288			400.487	-26.3758			413.842	-19.5856													310.43	-1.20358			309.955	-36.7637			311.102	-35.4298
									407.397	-203.125			400.913	-27.1041			414.568	-20.0711													311.126	-1.08749			310.585	-36.893			311.55	-35.9535
									407.731	-203.933			401.437	-27.8619			414.907	-20.6325													311.519	-0.89778			311.143	-36.7784			311.976	-36.1852
									408.248	-204.812			401.995	-28.677			415.441	-21.277													312.032	-0.57398			311.507	-36.487			312.445	-36.1968
									408.698	-205.831			402.482	-29.5695			416.12	-21.9475													312.415	-0.1656			312.077	-36.1316			312.952	-35.9707
									409.202	-206.985			402.757	-30.5083			416.337	-22.5629													313.119	0.33899			312.513	-35.8098			313.518	-35.5728
									409.834	-208.13			403.324	-31.4741			416.864	-23.0212													313.537	0.86309			313.076	-35.6286			314.001	-35.0669
									410.096	-209.066			403.882	-32.3015			417.277	-23.1716													313.887	1.37248			313.648	-35.6392			314.402	-34.5065
									410.526	-209.448			404.282	-32.9192			417.91	-22.9785													314.539	1.81283			314.011	-35.8865			315.068	-33.8626
									411.018	-208.984			404.764	-33.2497			418.285	-22.513													314.961	2.16179			314.409	-36.2727			315.464	-33.0662
									411.546	-207.493			405.21	-33.2804			418.834	-21.9476													315.63	2.36628			315.049	-36.6649			315.799	-32.0819
									412.107	-205.046			405.76	-33.0504			419.535	-21.5522													315.813	2.39504			315.434	-36.9622			316.497	-30.8843
									412.586	-201.963			406.261	-32.657			419.895	-21.4448													316.555	2.26474			315.954	-37.0786			316.873	-29.6214
									413.306	-198.798			406.805	-32.1864			420.313	-21.7137													316.791	1.97366			316.313	-36.9939			317.53	-28.5384
									413.724	-196.129			407.349	-31.7554			420.794	-22.3037													317.587	1.54659			316.968	-36.7861			318.141	-27.8814
									414.421	-194.407			407.56	-31.3946			421.245	-23.0646													317.897	1.07566			317.508	-36.4922			318.482	-27.7963
									414.853	-193.873			408.312	-31.2371			421.806	-23.9283													318.379	0.72352			318.03	-36.1559			318.884	-28.2623
									415.2	-194.46			408.744	-31.3303			422.263	-24.7675													318.751	0.64249			318.248	-35.722			319.428	-29.1282
									415.599	-195.944			409.214	-31.7197			422.71	-25.5723													319.368	0.90065			318.862	-35.1284			319.9	-30.2355
									416.125	-197.977			409.794	-32.468			423.221	-26.2328													319.797	1.54852			319.385	-34.3579			320.213	-31.4463
									416.626	-200.247			410.158	-33.4968			423.571	-26.7412													320.394	2.54246			319.92	-33.4866			320.909	-32.7156
									417.097	-202.487			410.547	-34.6721			424.258	-27.0382													320.912	3.78104			320.417	-32.6407			321.389	-34.0526
									417.471	-204.543			411.175	-35.8054			424.613	-27.0882													321.396	5.1015			320.975	-31.9942			321.8	-35.4407
									417.864	-206.348			411.424	-36.6999			425.086	-26.9408													321.675	6.34456			321.368	-31.6217			322.222	-36.7741
									418.5	-207.911			412.223	-37.2013			425.701	-26.6282													322.37	7.26198			321.97	-31.5281			322.655	-37.8971
									418.953	-209.337			412.359	-37.2083			426.033	-26.2342													323.003	7.66704			322.301	-31.6111			323.137	-38.6462
									419.436	-210.742			412.986	-36.7463			426.804	-25.8236													323.551	7.37403			322.854	-31.7468			323.702	-38.9491
									419.86	-212.224			413.689	-35.8612			426.957	-25.4471													323.779	6.42328			323.266	-31.8162			324.175	-38.8655
									420.419	-213.823			413.91	-34.7341			427.738	-25.1335													324.153	5.00157			323.812	-31.8642			324.597	-38.5333
									420.768	-215.472			414.552	-33.5586			428.003	-24.8723													324.839	3.44338			324.378	-31.9051			325.17	-38.1597
									421.307	-217.105			415.138	-32.5361			428.639	-24.6232													325.153	2.05204			324.869	-32.0126			325.837	-37.9445
									421.656	-218.659			415.586	-31.8631			429.158	-24.3709													325.742	1.08984			325.236	-32.2296			326.045	-37.9874
									422.231	-220.199			416.088	-31.6339			429.432	-24.0495													326.082	0.66665			325.763	-32.5519			326.69	-38.2728
									422.691	-221.879			416.531	-31.8478			430.107	-23.6764													326.67	0.74648			326.279	-32.9403			327.111	-38.7076
									423.293	-223.801			416.98	-32.4605			430.525	-23.2994													327.226	1.14907			326.701	-33.3462			327.529	-39.1422
									423.704	-226.017			417.48	-33.3293			431.124	-22.9557													327.597	1.63887			327.173	-33.7474			328.076	-39.4635
									424.1	-228.345			418.044	-34.3904			431.586	-22.717													328.215	2.01556			327.856	-34.1433			328.514	-39.6438
									424.422	-230.466			418.341	-35.4791			432.004	-22.5385													328.764	2.15939			328.058	-34.5018			329.062	-39.7441
									425.005	-231.975			418.933	-36.4132			432.524	-22.4148													329.208	2.04471			328.703	-34.7727			329.531	-39.8742
									425.331	-232.507			419.428	-37.047			433.007	-22.2314													329.52	1.79507			329.194	-34.8565			330.131	-40.1513
									426.002	-231.921			419.723	-37.2629			433.414	-22.024													330.048	1.64782			329.607	-34.6331			330.498	-40.5976
									426.448	-230.291			420.309	-37.0557			434.03	-21.8201													330.603	1.80695			330.062	-34.0842			330.992	-41.1301
									426.831	-227.904			420.767	-36.5548			434.539	-21.6998													331.074	2.34087			330.499	-33.3109			331.394	-41.6658
									427.758	-225.173			421.483	-35.9481			434.996	-21.7995													331.625	3.18673			331.267	-32.4972			331.915	-42.0776
									428.029	-222.576			422.043	-35.4194			435.508	-22.1114													331.967	4.14887			331.717	-31.8575			332.444	-42.3302
									428.685	-220.416			422.256	-35.0024			435.928	-22.6213													332.626	4.99275			332.235	-31.5215			332.954	-42.4487
									429.094	-218.841			422.781	-34.6492			436.383	-23.2047													333.248	5.4834			332.645	-31.451			333.397	-42.4471
									429.582	-217.752			423.214	-34.1986			436.823	-23.7377													333.654	5.52684			333.005	-31.4222			333.924	-42.3534
									430.141	-216.877			423.852	-33.6173			437.508	-24.1098													334.014	5.17585			333.429	-31.2554			334.352	-42.1624
									430.533	-215.851			424.363	-32.8775			437.776	-24.2895													334.371	4.61038			334.138	-30.7893			334.866	-41.8629
									430.842	-214.38			424.814	-32.0551			438.301	-24.2546													335.145	3.96955			334.589	-30.0807			335.333	-41.4484
									431.542	-212.349			425.299	-31.3346			438.91	-24.0689													335.432	3.34565			335.072	-29.2721			335.87	-40.9712
									432.187	-209.938			425.858	-30.8179			439.262	-23.8162													336.028	2.81822			335.653	-28.5408			336.435	-40.4618
									432.548	-207.554			426.239	-30.6389			439.951	-23.5767													336.452	2.37947			336.138	-28.0061			336.866	-39.9857
									433.244	-205.634			426.934	-30.8052			440.297	-23.3954													336.972	2.08512			336.554	-27.6637			337.265	-39.5295
									433.756	-204.6			427.251	-31.2186			440.797	-23.2801													337.444	1.94147			336.997	-27.4144			337.847	-39.1131
									434.235	-204.548			427.858	-31.7926			441.275	-23.1764													337.839	1.95597			337.546	-27.1596			338.37	-38.7351
									434.675	-205.374			427.997	-32.3787			441.885	-23.0393													338.303	2.07366			337.977	-26.8247			338.802	-38.43
									434.906	-206.745			428.651	-32.9055			442.119	-22.8644													339.058	2.18325			338.666	-26.3936			339.332	-38.2399
									435.466	-208.272			429.355	-33.3081			442.775	-22.6733													339.536	2.17495			338.928	-25.9066			339.827	-38.1889
									436.011	-209.728			429.646	-33.6395			443.353	-22.6202													339.772	2.03077			339.513	-25.4378			340.269	-38.2896
									436.452	-211.039			430.283	-33.9272			443.759	-22.8193													340.388	1.8557			340.051	-25.0503			340.844	-38.4941
									437.043	-212.198			430.522	-34.1873			444.239	-23.4037													340.745	1.73872			340.595	-24.8128			341.154	-38.7595
									437.472	-213.231			430.979	-34.3946			444.807	-24.3599													341.355	1.82051			340.892	-24.7656			341.818	-39.007
									437.8	-214.139			431.768	-34.5657			445.134	-25.5285													341.869	2.1441			341.563	-24.9347			342.172	-39.2146
									438.455	-214.774			432.184	-34.7385			445.672	-26.7094													342.334	2.66926			341.956	-25.3628			342.71	-39.3815
									438.762	-214.969			432.582	-34.9491			446.052	-27.6139													342.784	3.34089			342.411	-26.0483			343.237	-39.5239
									439.278	-214.629			432.904	-35.1955			446.498	-28.0459													343.32	4.10499			342.962	-26.9943			343.658	-39.6585
									439.962	-213.706			433.706	-35.5363			447.072	-27.9051													343.766	4.88944			343.543	-28.1432			344.23	-39.8216
									440.271	-212.301			434.031	-35.9784			447.51	-27.2929													344.427	5.6823			343.748	-29.3473			344.584	-40.0332
									440.785	-210.58			434.517	-36.5949			448.317	-26.3669													344.825	6.46301			344.304	-30.4741			345.199	-40.3117
									441.492	-208.774			434.949	-37.4663			448.426	-25.2742													345.159	7.13397			344.803	-31.3495			345.597	-40.6402
									441.968	-207.183			435.553	-38.587			449.131	-24.1718													345.799	7.69003			345.267	-31.8699			346.185	-40.9674
									442.325	-206.02			436.157	-39.9136			449.725	-23.1068													346.453	8.007			345.788	-32.0014			346.569	-41.2569
									442.915	-205.443			436.278	-41.2358			449.978	-22.1031													346.778	8.02694			346.162	-31.8989			347.046	-41.4493
									443.582	-205.492			436.802	-42.2285			450.587	-21.1644													347.192	7.71475			346.884	-31.6709			347.485	-41.5767
									443.817	-206.072			437.3	-42.6384			451.108	-20.2576													347.796	7.04583			347.251	-31.4412			348.081	-41.7159
									444.271	-207.031			437.752	-42.329			451.665	-19.4935													348.254	6.13998			347.804	-31.2978			348.641	-41.9409
									444.73	-208.264			438.475	-41.3662			452.089	-18.9787													348.724	5.16684			348.273	-31.2689			349.111	-42.2975
									445.281	-209.725			438.756	-39.9066			452.474	-18.8405													349.217	4.31735			348.617	-31.2913			349.437	-42.7263
									445.897	-211.454			439.408	-38.2396			453.212	-19.2279													349.446	3.78703			349.123	-31.4672			349.96	-43.094
									446.211	-213.484			440.046	-36.615			453.608	-20.0885													350.18	3.6391			349.722	-31.8711			350.414	-43.2033
									446.721	-215.765			440.342	-35.1964			454.187	-21.3783													350.583	3.79768			350.475	-32.6502			350.954	-42.9545
									447.095	-218.119			440.874	-34.0649			454.314	-22.8433													351.185	4.10704			350.58	-33.8205			351.46	-42.3379
									447.575	-220.383			441.467	-33.1896			454.727	-24.1783													351.806	4.41117			351.045	-35.2534			351.955	-41.5132
									447.897	-222.387			441.906	-32.5456			455.629	-25.1412													351.962	4.6007			351.67	-36.7383			352.408	-40.6418
									448.599	-224.052			442.355	-32.091			455.826	-25.5478													352.605	4.67614			352.016	-37.9274			353.033	-39.9483
									449.079	-225.461			442.845	-31.8246			456.335	-25.4123													353.098	4.6571			352.25	-38.6576			353.595	-39.5426
									449.411	-226.735			443.422	-31.8301			456.873	-24.833													353.571	4.55632			353.152	-38.8354			353.907	-39.4248
									449.947	-228.032			443.898	-32.0711			457.251	-24.0041													354.071	4.35269			353.475	-38.5624			354.311	-39.5941
									450.489	-229.535			444.337	-32.6002			458.128	-23.1598													354.546	4.01438			354.153	-38.0311			354.879	-40.0554
									450.811	-231.358			444.912	-33.3502			458.472	-22.3751													355.105	3.42395			354.37	-37.4222			355.465	-40.8383
									451.51	-233.619			445.212	-34.1809			458.862	-21.7066													355.548	2.6681			355.005	-36.9211			356.017	-41.9451
									451.843	-236.29			445.635	-35.0644			459.24	-21.0606													355.909	1.79848			355.599	-36.6242			356.263	-43.3051
									452.295	-239.278			446.281	-35.8877			459.789	-20.3845													356.392	0.86727			355.895	-36.6449			356.915	-44.7543
									452.688	-242.336			446.841	-36.6435			460.547	-19.6839													357.085	0.00641			356.654	-37.0257			357.128	-46.0478
									453.071	-245.26			447.308	-37.2692			460.851	-18.9594													357.395	-0.75404			356.858	-37.6541			357.544	-47.0549
									453.579	-247.866			447.393	-37.7033			461.375	-18.3453													357.831	-1.3004			357.503	-38.3697			358.344	-47.7391
									454.173	-250.078			448.268	-37.8847			461.903	-17.8967													358.412	-1.53496			357.845	-38.9744			358.791	-48.1798
									454.517	-251.935			448.62	-37.7741			462.244	-17.6447													358.99	-1.37264			358.24	-39.2377			359.283	-48.5014
									455.064	-253.427			449.085	-37.4313			462.993	-17.6489													359.082	-0.82144			358.891	-39.0902			359.61	-48.7535
									455.477	-254.543			449.845	-36.9606			463.304	-17.8239													359.882	0.01773			359.346	-38.505			360.156	-48.8575
									456.018	-255.271			449.931	-36.4699			463.79	-18.1744													360.588	0.98686			359.889	-37.6182			360.629	-48.7414
									456.32	-255.477			450.819	-36.1209			464.322	-18.6117													360.825	1.93907			360.472	-36.541			361.031	-48.3517
									456.992	-255.075			451.032	-35.9964			464.765	-19.0743													361.417	2.76851			360.767	-35.3704			361.751	-47.8233
									457.507	-253.95			451.66	-36.1903			465.291	-19.511													361.827	3.49694			361.401	-34.1534			362.161	-47.2668
									457.93	-252.041			452.161	-36.6523			465.602	-19.9172													362.307	4.24346			361.864	-32.8759			362.671	-46.8772
									458.404	-249.393			452.579	-37.328			466.261	-20.3645													362.798	5.0022			362.444	-31.5752			363.169	-46.757
									458.789	-246.179			453.081	-38.1737			466.845	-20.9446													363.423	5.67298			362.86	-30.3156			363.622	-46.8694
									459.667	-242.735			453.413	-38.9731			467.1	-21.7636													363.868	6.1202			363.277	-29.2728			364.021	-47.1418
									460.27	-239.514			453.973	-39.6365			467.823	-22.8841													364.37	6.22505			363.985	-28.6392			364.64	-47.445
									460.617	-236.847			454.61	-40.0005			467.999	-24.2415													364.876	5.9045			364.53	-28.5513			365.008	-47.7445
									461.192	-234.882			454.896	-39.9176			468.625	-25.7419													365.418	5.36822			365.019	-29.0237			365.608	-48.027
									461.587	-233.443			455.542	-39.3923			469.108	-27.2244													365.653	4.85529			365.214	-29.8926			365.936	-48.3494
									462.1	-232.236			455.618	-38.3917			469.592	-28.5362													366.068	4.53151			365.763	-30.916			366.608	-48.8056
									462.521	-230.871			456.595	-37.1176			469.837	-29.5601													366.799	4.49343			366.147	-31.832			367.05	-49.4167
									462.962	-229.147			457.145	-35.7647			470.426	-30.201													367.339	4.63761			366.813	-32.5037			367.514	-50.1578
									463.631	-227.059			457.44	-34.6023			471.11	-30.4994													367.751	4.83139			367.333	-32.9126			367.916	-50.9321
									464.221	-224.888			458.189	-33.7589			471.472	-30.4347													368.323	4.99143			367.689	-33.0791			368.327	-51.6131
									464.687	-223.019			458.272	-33.2129			471.923	-30.0126													368.689	5.14401			368.234	-33.084			368.983	-52.0923
									465.246	-221.765			459.015	-32.9005			472.385	-29.3158													368.965	5.32266			368.658	-32.9781			369.383	-52.349
									465.648	-221.303			459.537	-32.6368			472.906	-28.3866													369.812	5.60703			369.177	-32.7781			369.892	-52.3706
									466.276	-221.648			459.85	-32.2939			473.528	-27.3962													370.241	5.95405			369.805	-32.5408			370.381	-52.2145
									466.568	-222.609			460.476	-31.8524			473.983	-26.4655													370.669	6.33885			370.045	-32.2956			370.867	-51.9612
									467.045	-223.996			460.838	-31.3051			474.476	-25.7767													371.243	6.67226			370.835	-32.1221			371.332	-51.6904
									467.382	-225.626			461.613	-30.8173			475.126	-25.3588													371.585	6.90082			371.148	-32.0152			371.892	-51.4791
									468.206	-227.41			461.826	-30.466			475.283	-25.1506													372.079	6.99694			371.561	-31.9704			372.382	-51.3905
									468.472	-229.384			462.432	-30.3596			475.915	-24.9902													372.702	6.86942			372.219	-31.9857			372.846	-51.4303
									468.955	-231.557			463.093	-30.5901			476.496	-24.6791													373.263	6.43626			372.596	-31.9819			373.358	-51.5524
									469.413	-233.919			463.246	-31.1018			476.835	-24.1374													373.524	5.65829			373.121	-32.0162			373.72	-51.6934
									469.859	-236.427			463.931	-31.8819			477.312	-23.3704													374.197	4.57795			373.663	-32.0444			374.249	-51.7869
									470.283	-238.966			464.347	-32.7506			477.835	-22.5311													374.478	3.30476			374.024	-32.1066			374.87	-51.8207
									470.872	-241.425			464.764	-33.5713			478.728	-21.7987													375.024	2.08118			374.612	-32.2363			375.166	-51.8323
									471.169	-243.721			465.332	-34.2518			478.888	-21.2906													375.452	1.0929			375.025	-32.4619			375.86	-51.8839
									471.603	-245.864			465.7	-34.7067			479.309	-21.0719													375.98	0.4321			375.591	-32.8654			376.264	-52.0137
									472.268	-247.957			466.262	-34.9306			479.875	-21.1173													376.506	0.14202			376.174	-33.4416			376.695	-52.1986
									472.619	-250.157			466.778	-34.8973			480.361	-21.3357													376.861	0.16619			376.305	-34.1889			377.172	-52.3944
									473.177	-252.518			467.248	-34.7051			480.904	-21.7507													377.5	0.3777			377.216	-35.0493			377.706	-52.5418
									473.67	-255.055			467.776	-34.4039			481.303	-22.3187													377.985	0.66992			377.273	-35.8682			378.223	-52.6138
									473.97	-257.62			468.046	-34.0915			481.92	-23.0307													378.439	0.97403			378.004	-36.5483			378.601	-52.6094
									474.334	-260.019			468.817	-33.948			482.249	-23.8467													378.896	1.18331			378.389	-37.0129			379.191	-52.5512
									474.923	-262.078			469.328	-34.0622			482.705	-24.6397													379.411	1.28506			378.862	-37.2655			379.713	-52.4316
									475.372	-263.722			469.752	-34.5099			483.299	-25.3061													379.977	1.21912			379.377	-37.3948			380.134	-52.2082
									476.013	-264.945			470.127	-35.2178			483.686	-25.6472													380.358	0.9904			379.947	-37.425			380.53	-51.8904
									476.324	-265.865			470.609	-35.9763			484.147	-25.596													380.853	0.62411			380.468	-37.4207			381.146	-51.4619
									476.782	-266.611			471.155	-36.6083			484.739	-25.2008													381.476	0.21119			380.862	-37.306			381.596	-50.9838
									477.303	-267.356			471.434	-36.9576			485.054	-24.5808													381.806	-0.09665			381.177	-36.963			382.157	-50.5509
									477.81	-268.333			472.125	-37.0172			485.817	-24.0005													382.211	-0.15584			381.808	-36.424			382.689	-50.2108
									478.399	-269.779			472.624	-36.8765			486.28	-23.6892													382.804	0.12361			382.335	-35.7037			383.1	-49.8821
									478.849	-271.827			473.099	-36.6376			486.734	-23.8007													383.297	0.71469			382.954	-35.0354			383.531	-49.3838
									479.224	-274.513			473.709	-36.4379			487.332	-24.279													383.844	1.51258			383.418	-34.6097			384.029	-48.55
									479.639	-277.704			473.935	-36.2692			487.473	-24.9896													384.322	2.3244			383.778	-34.4985			384.521	-47.2661
									480.108	-281.123			474.42	-36.1934			487.99	-25.7227													384.841	2.98198			384.521	-34.6239			385.008	-45.5661
									480.453	-284.493			475.149	-36.2309			488.669	-26.316													385.334	3.43521			384.619	-34.7944			385.624	-43.6784
									481.029	-287.572			475.562	-36.4575			489.043	-26.7569													385.773	3.69706			385.135	-34.8559			386.28	-41.8728
									481.42	-290.28			476.113	-36.9113			489.717	-27.0848													386.236	3.84121			385.797	-34.7752			386.703	-40.3331
									481.93	-292.64			476.449	-37.5628			490.014	-27.3777													386.844	4.0678			386.234	-34.7282			387.024	-39.1626
									482.304	-294.767			476.887	-38.3724			490.484	-27.7066													387.218	4.44826			386.931	-34.8917			387.574	-38.3355
									482.948	-296.808			477.464	-39.1768			490.984	-28.0249													387.611	5.02301			387.46	-35.3158			388.178	-37.7689
									483.374	-298.88			477.839	-39.9234			491.626	-28.3306													388.31	5.69775			387.567	-35.9172			388.6	-37.4103
									483.774	-301.018			478.58	-40.5412			491.945	-28.6136													388.801	6.28212			388.058	-36.4287			389.069	-37.2216
									484.22	-303.216			478.729	-41.0256			492.43	-28.8966													389.217	6.60535			388.553	-36.582			389.692	-37.2112
									484.686	-305.449			479.357	-41.4456			492.983	-29.2283													389.827	6.5178			389.183	-36.3156			390	-37.3423
									485.186	-307.63			479.858	-41.8411			493.412	-29.6446													390.314	6.03775			389.698	-35.6543			390.495	-37.6285
									485.634	-309.775			480.413	-42.2114			494.095	-30.1479													390.503	5.27516			390.343	-34.8351			391.115	-38.0113
									486.138	-311.856			480.87	-42.5544			494.387	-30.6909													391.234	4.41541			390.491	-34.0343			391.551	-38.4334
									486.557	-313.867			481.134	-42.7906			494.732	-31.1749													391.56	3.64402			391.15	-33.3655			391.965	-38.8424
									487.039	-315.715			481.894	-42.9049			495.408	-31.5023													392.212	3.07812			391.849	-32.8503			392.455	-39.2179
									487.428	-317.35			482.091	-42.8702			495.848	-31.5963													392.591	2.76597			392.08	-32.4379			392.918	-39.547
									488.021	-318.602			482.868	-42.727			496.427	-31.4949													392.984	2.65512			392.514	-32.0676			393.531	-39.8339
									488.505	-319.273			483.357	-42.5945			496.68	-31.2671													393.662	2.73552			393.229	-31.6902			393.881	-40.1354
									488.756	-319.121			483.699	-42.4813			497.36	-31.0683													394.059	2.94482			393.588	-31.3185			394.554	-40.531
									489.488	-317.973			484.22	-42.4821			497.974	-30.9991													394.641	3.20295			394.183	-30.9334			394.799	-41.0356
									489.834	-315.777			484.714	-42.6042			498.295	-31.1159													395.008	3.49148			394.548	-30.5794			395.4	-41.6697
									490.345	-312.718			485.164	-42.9106			498.853	-31.4411													395.484	3.78749			395.138	-30.3361			395.904	-42.3618
									490.905	-309.242			485.816	-43.4491			499.128	-31.8748													396.136	4.08274			395.527	-30.2359			396.394	-43.0136
									491.837	-305.967			486.094	-44.2796			499.694	-32.371													396.535	4.44495			396.17	-30.4006			396.782	-43.5369
									492.192	-303.499			486.758	-45.4228			500.414	-32.8617													397.07	4.88453			396.654	-30.8383			397.187	-43.8913
									492.609	-302.248			487.2	-46.7073			500.765	-33.1984													397.376	5.45076			396.933	-31.5279			397.777	-44.1004
									493.066	-302.284			487.41	-47.9243			501.167	-33.2259													398.004	6.09941			397.65	-32.4195			398.397	-44.263
									493.649	-303.423			488.075	-48.7507			501.501	-32.7233													398.582	6.69561			397.816	-33.3758			398.817	-44.4625
									493.95	-305.287			488.443	-48.9825			502.164	-31.6248													399.034	7.09977			398.582	-34.2272			399.275	-44.7785
									494.373	-307.481			488.994	-48.5617			502.725	-29.9627													399.583	7.16625			398.986	-34.8251			399.634	-45.1621
									494.846	-309.685			489.425	-47.6013			503.129	-27.9513													399.901	6.80212			399.283	-35.0414			400.251	-45.5567
									495.418	-311.749			490.146	-46.3763			503.882	-25.9617													400.504	5.99658			399.89	-34.8973			400.71	-45.8907
									495.859	-313.657			490.664	-45.1521			504.331	-24.318													400.993	4.81258			400.303	-34.5291			401.172	-46.1482
									496.324	-315.465			491.063	-44.1266			504.775	-23.2829													401.379	3.38767			401.075	-34.2226			401.652	-46.3814
									496.669	-317.096			491.515	-43.3603			505.293	-22.9365													401.877	1.89473			401.504	-34.2313			402.175	-46.6631
									497.454	-318.42			492.002	-42.7904			505.682	-23.1922													402.376	0.54297			401.898	-34.6749			402.695	-47.07
									497.714	-319.126			492.615	-42.2711			506.307	-23.9278													402.789	-0.48993			402.479	-35.5321			403.189	-47.613
									497.977	-318.819			492.951	-41.6628			506.637	-24.9575													403.206	-1.00194			402.739	-36.5333			403.58	-48.1962
									498.616	-317.252			493.5	-40.8343			507.129	-26.1059													403.844	-0.90398			403.176	-37.4538			403.99	-48.7639
									499.051	-314.475			494.074	-39.7715			507.655	-27.1921													404.213	-0.24997			403.752	-38.0007			404.58	-49.24
									499.789	-310.956			494.382	-38.5447			508.07	-28.0777													404.759	0.80223			404.312	-38.0696			405.063	-49.6514
									500.427	-307.408			495.11	-37.3428			508.561	-28.7195													405.335	1.88961			404.835	-37.6861			405.58	-50.0256
									500.975	-304.613			495.513	-36.324			508.996	-29.0921													405.819	2.74906			405.207	-36.9107			405.999	-50.429
									501.593	-303.141			496.253	-35.6337			509.545	-29.2703													406.438	3.15976			405.65	-35.8782			406.564	-50.8758
									501.872	-303.144			496.542	-35.3137			510.158	-29.3201													406.844	3.08124			406.324	-34.691			406.995	-51.3318
									502.191	-304.454			496.888	-35.2292			510.533	-29.2925													407.159	2.64194			406.818	-33.5221			407.345	-51.7046
									502.824	-306.603			497.475	-35.19			510.956	-29.225													407.705	2.10335			407.397	-32.5214			408.039	-51.9368
									503.123	-309.13			497.988	-34.9975			511.475	-29.0738													408.171	1.68162			407.633	-31.7527			408.385	-51.9743
									503.733	-311.607			498.489	-34.5897			511.999	-28.8069													408.689	1.50856			408.363	-31.208			408.956	-51.8475
									504.025	-313.765			498.952	-33.986			512.549	-28.3898													409.364	1.64918			408.832	-30.8209			409.384	-51.6279
									504.654	-315.413			499.368	-33.3316			512.987	-27.741													409.505	2.07884			409.203	-30.4642			409.953	-51.3989
									505.032	-316.4			500.096	-32.8294			513.475	-26.8214													410.202	2.73517			409.638	-30.0851			410.407	-51.2602
									505.442	-316.637			500.603	-32.6383			513.836	-25.5967													410.684	3.50681			410.159	-29.7192			410.917	-51.2835
									506.096	-316.042			500.868	-32.8325			514.499	-24.2021													411.226	4.24656			410.88	-29.5323			411.363	-51.518
									506.563	-314.528			501.452	-33.3477			515.08	-22.764													411.625	4.82012			411.319	-29.7043			411.95	-51.9215
									506.994	-312.138			501.933	-34.0082			515.534	-21.4721													412.268	5.12858			411.74	-30.3175			412.276	-52.4308
									507.377	-309.09			502.386	-34.6563			516.068	-20.5127													412.712	5.15775			412.134	-31.3161			412.84	-52.9659
									508.286	-305.745			502.741	-35.1145			516.6	-19.9448													413.121	4.98925			412.701	-32.4815			413.281	-53.3892
									508.617	-302.641			503.368	-35.3072			516.88	-19.742													413.51	4.69118			413.011	-33.5996			413.781	-53.6379
									509.296	-300.308			503.791	-35.305			517.462	-19.8348													414.094	4.31229			413.555	-34.4298			414.27	-53.6448
									509.94	-299.138			504.432	-35.2374			517.952	-20.1459													414.677	3.8756			414.017	-34.9008			414.763	-53.4376
									510.223	-299.174			504.779	-35.3607			518.691	-20.6367													415.116	3.28572			414.617	-35.0247			415.247	-53.0855
									510.518	-300.216			505.38	-35.8406			518.695	-21.2555													415.599	2.56031			415.069	-34.9245			415.701	-52.711
									511.087	-301.838			505.737	-36.7698			519.431	-22.0058													416.005	1.73248			415.567	-34.714			416.33	-52.4541
									511.598	-303.583			506.487	-38.0427			519.987	-22.847													416.427	0.92641			415.997	-34.445			416.794	-52.4597
									511.979	-305.091			506.684	-39.3887			520.29	-23.7395													417.007	0.24185			416.514	-34.1964			417.228	-52.7715
									512.416	-306.222			507.045	-40.4511			520.845	-24.6493													417.551	-0.23182			417.068	-33.9696			417.714	-53.3775
									513.028	-307.043			507.558	-40.9603			521.342	-25.5341													417.882	-0.55326			417.49	-33.7825			418.131	-54.1766
									513.451	-307.765			507.953	-40.846			521.782	-26.3127													418.404	-0.80333			418.066	-33.5914			418.699	-55.0586
									513.956	-308.682			508.847	-40.2588			522.235	-26.9708													418.998	-1.07114			418.375	-33.406			419.131	-55.9179
									514.609	-310.04			509.26	-39.5159			522.673	-27.4953													419.481	-1.41469			419.057	-33.2286			419.544	-56.6821
									514.918	-311.924			509.758	-38.9066			523.325	-27.9147													419.988	-1.76385			419.426	-33.0655			420.099	-57.3504
									515.411	-314.261			509.99	-38.6356			523.735	-28.1924													420.281	-1.98633			419.946	-32.9341			420.654	-57.8982
									515.682	-316.908			510.7	-38.7426			524.196	-28.3934													420.752	-1.95026			420.599	-32.8789			421.035	-58.3477
									516.25	-319.67			511.149	-39.2285			524.678	-28.4558													421.337	-1.54947			420.836	-32.9059			421.481	-58.6975
									516.671	-322.499			511.663	-39.957			525.163	-28.3713													422.031	-0.83344			421.417	-33.0795			422.027	-58.9608
									517.343	-325.428			512.02	-40.84			525.567	-28.1613													422.291	0.07881			421.855	-33.4151			422.532	-59.2321
									517.57	-328.566			512.569	-41.7434			526.241	-27.8877													422.781	1.0483			422.514	-33.9746			423.004	-59.5692
									518.191	-331.962			513.001	-42.5718			526.749	-27.6653													423.473	1.85976			422.963	-34.7801			423.507	-60.0245
									518.55	-335.578			513.47	-43.2394			527.133	-27.5731													423.846	2.37544			423.253	-35.7382			424.071	-60.5679
									518.895	-339.251			513.939	-43.6903			527.558	-27.688													424.378	2.56556			423.814	-36.7676			424.322	-61.1495
									519.45	-342.733			514.522	-43.92			528.207	-28.0045													424.919	2.43641			424.304	-37.7036			424.925	-61.6688
									519.801	-345.831			515.068	-43.8393			528.574	-28.4926													425.221	2.11168			424.676	-38.4234			425.373	-62.055
									520.382	-348.427			515.346	-43.4394			529.163	-29.0923													425.856	1.78004			425.322	-38.9165			425.858	-62.2534
									520.622	-350.604			515.877	-42.6181			529.452	-29.7224													426.225	1.55811			425.622	-39.18			426.539	-62.3088
									521.285	-352.575			516.351	-41.4227			530.054	-30.2928													426.648	1.49541			426.381	-39.2899			426.773	-62.2988
									521.847	-354.66			517.059	-39.9969			530.593	-30.6659													427.372	1.5218			426.69	-39.2971			427.283	-62.3225
									522.313	-357.101			517.396	-38.6004			530.918	-30.7362													427.763	1.44431			427.085	-39.268			427.868	-62.4784
									522.691	-360.071			518.173	-37.5528			531.522	-30.4114													428.221	1.1346			427.788	-39.2515			428.492	-62.8477
									523.109	-363.509			518.532	-37.026			531.835	-29.691													428.9	0.58293			428.169	-39.2275			428.806	-63.4369
									523.501	-367.206			518.854	-37.0652			532.551	-28.7451													429.175	-0.1367			428.617	-39.2566			429.29	-64.1534
									523.947	-370.901			519.616	-37.539			532.991	-27.801													429.45	-0.83884			429.345	-39.219			429.646	-64.8823
									524.457	-374.356			519.798	-38.1811			533.593	-27.1473													430.207	-1.39954			429.565	-39.0213			430.274	-65.4619
									524.885	-377.463			520.386	-38.7473			534.126	-27.0313													430.639	-1.79774			429.986	-38.5315			430.744	-65.8143
									525.282	-380.201			520.762	-39.0941			534.445	-27.4776													431.229	-2.04574			430.592	-37.7083			431.217	-65.936
									525.779	-382.68			521.312	-39.2143			534.962	-28.444													431.634	-2.18035			431.177	-36.7247			431.67	-65.8127
									526.364	-385.029			522.054	-39.2744			535.415	-29.6671													432.006	-2.24964			431.716	-35.762			432.217	-65.5265
									526.803	-387.355			522.223	-39.421			535.851	-30.8689													432.596	-2.19756			432.044	-35.1725			432.7	-65.132
									527.124	-389.796			522.944	-39.8183			536.409	-31.7621													433.074	-2.06105			432.954	-35.1996			433.195	-64.6633
									527.636	-392.435			523.356	-40.4475			536.659	-32.1042													433.512	-1.92118			432.99	-35.8956			433.646	-64.1646
									528.184	-395.287			523.727	-41.2043			537.413	-31.8056													434.198	-1.82496			433.694	-37.1737			434.159	-63.7069
									528.632	-398.341			524.271	-41.9323			537.775	-30.8802													434.568	-1.8469			433.887	-38.831			434.738	-63.3421
									529.055	-401.501			524.6	-42.431			538.153	-29.5762													435.024	-1.9909			434.583	-40.5712			435.188	-63.1456
									529.396	-404.581			525.213	-42.6836			539.033	-28.2461													435.459	-2.11526			435.027	-42.1653			435.575	-63.113
									529.882	-406.873			525.822	-42.7343			539.378	-27.2238													436.057	-2.09267			435.22	-43.4559			436.19	-63.2306
									530.268	-407.935			526.144	-42.6784			540.077	-26.7919													436.4	-1.8066			436.086	-44.3378			436.636	-63.4814
									531.027	-406.594			526.748	-42.6132			540.307	-26.9828													437.035	-1.21197			436.336	-44.8002			437.041	-63.8544
									531.334	-400.962			527.214	-42.4824			540.787	-27.6375													437.487	-0.37709			436.813	-44.9072			437.616	-64.3593
									531.71	-388.473			527.661	-42.274			541.201	-28.5183													437.925	0.56062			437.39	-44.8231			438.056	-65.0135
									532.228	-366.375			528.075	-41.8327			541.7	-29.3638													438.549	1.41423			437.947	-44.669			438.591	-65.8246
									532.578	-332.788			528.571	-41.1154			542.358	-30.0444													439.031	1.98232			438.394	-44.6675			439.084	-66.7777
									533.112	-287.914			529.241	-40.1333			542.736	-30.4947													439.505	2.17849			438.855	-44.8428			439.417	-67.8333
									534.077	-234.748			529.714	-38.9607			543.075	-30.7292													440.008	1.98468			439.407	-45.2268			439.927	-68.9109
									538.921	-178.609			530.079	-37.7874			543.769	-30.8749													440.464	1.46075			439.781	-45.6469			440.497	-69.9062
									539.273	-125.655			530.731	-36.763			544.15	-31.0053													440.827	0.72293			440.265	-45.9155			440.946	-70.749
									539.856	-80.8638			531.136	-36.003			544.684	-31.2798													441.385	-0.14387			440.726	-45.9531			441.414	-71.3209
									540.364	-46.8099			531.839	-35.5841			545.273	-31.743													441.949	-1.08598			441.213	-45.6496			441.795	-71.5507
									540.73	-23.3282			532.075	-35.4761			545.644	-32.4352													442.393	-2.06002			441.805	-45.1115			442.312	-71.4171
									541.277	-8.5182			532.694	-35.6258			546.086	-33.2465													442.858	-3.00546			442.358	-44.4626			442.882	-70.9561
									541.829	0.14782			532.993	-35.9501			546.588	-34.0157													443.253	-3.82795			442.71	-43.8483			443.451	-70.2915
									542.414	4.89801			533.584	-36.4214			546.932	-34.6114													443.736	-4.38753			443.385	-43.3443			443.87	-69.5688
									542.897	7.27497			534.247	-37.0333			547.632	-34.901													444.31	-4.55821			443.625	-43.0018			444.298	-68.9079
									543.435	8.19095			534.564	-37.7368			548.001	-34.8892													444.713	-4.32708			444.257	-42.8563			444.925	-68.4459
									543.759	8.04612			535.019	-38.4916			548.54	-34.6608													445.321	-3.75329			444.862	-42.8288			445.344	-68.2768
									544.353	7.5711			535.452	-39.2401			548.978	-34.3136													445.655	-2.9782			445.135	-42.8797			445.871	-68.4353
									544.668	6.97977			535.967	-39.8882			549.609	-33.9965													446.337	-2.14226			445.781	-42.9336			446.325	-68.9509
									545.29	6.516			536.522	-40.4318			549.98	-33.7932													446.816	-1.44066			446.109	-42.8828			446.838	-69.7503
									545.728	6.31314			536.932	-40.88			550.521	-33.7439													447.286	-0.94554			446.666	-42.6981			447.304	-70.7004
									546.207	6.38833			537.514	-41.3531			551.088	-33.8108													447.713	-0.71983			447.101	-42.3284			447.707	-71.6459
									546.639	6.6693			537.918	-41.8828			551.349	-33.9698													448.141	-0.80943			447.779	-41.8181			448.117	-72.3822
									547.266	7.01208			538.35	-42.5058			551.955	-34.1385													448.841	-1.22716			448.27	-41.2761			448.729	-72.7815
									547.775	7.23119			538.993	-43.2048			552.426	-34.3018													449.253	-2.00989			448.424	-40.7543			449.203	-72.8309
									548.257	7.19079			539.379	-43.882			552.986	-34.4459													449.668	-3.08169			449.236	-40.4312			449.636	-72.5844
									548.653	6.86464			539.746	-44.4597			553.474	-34.5521													450.041	-4.35456			449.753	-40.3687			450.244	-72.1254
									549.123	6.31187			540.283	-44.9144			553.833	-34.5976													450.826	-5.59727			450.124	-40.6217			450.617	-71.5983
									549.742	5.72982			540.838	-45.2644			554.384	-34.5696													450.934	-6.58275			450.742	-41.1648			451.177	-71.0949
									550.085	5.29846			541.395	-45.5685			554.778	-34.4277													451.514	-7.07265			450.914	-41.8827			451.769	-70.7742
									550.487	5.1595			541.71	-45.9258			555.527	-34.2011													452.068	-6.93762			451.623	-42.6051			452.028	-70.758
									551.011	5.35949			542.287	-46.4008			555.787	-33.947													452.474	-6.17872			452.041	-43.1625			452.697	-71.1403
									551.69	5.80648			542.856	-46.9781			556.375	-33.7042													453.142	-4.934			452.419	-43.4191			453.257	-71.9454
									552.133	6.37465			543.149	-47.6256			556.91	-33.571													453.492	-3.48524			453.153	-43.3252			453.59	-73.1283
									552.619	6.95017			543.63	-48.2817			557.21	-33.5898													454.164	-2.11047			453.338	-42.9102			454.033	-74.4943
									553.06	7.47422			544.282	-48.9237			557.91	-33.8174													454.577	-1.08382			454.057	-42.3272			454.487	-75.8676
									553.495	7.98518			544.614	-49.5668			558.384	-34.2447													455.126	-0.56785			454.474	-41.6911			454.847	-77.1333
									554.059	8.52351			545.123	-50.2362			558.74	-34.8659													455.656	-0.59888			455.172	-41.1288			455.622	-78.2408
									554.639	9.12546			545.768	-50.9781			559.25	-35.6449													456.042	-0.97851			455.468	-40.6949			455.976	-79.2525
									554.99	9.79791			546.074	-51.7427			559.758	-36.454													456.439	-1.5134			456	-40.3364			456.425	-80.2417
									555.593	10.5478			546.516	-52.456			560.156	-37.2686													456.919	-1.98963			456.337	-40.0065			456.911	-81.1923
									555.962	11.3313			547.05	-53.0438			560.747	-37.9707													457.536	-2.25405			457.019	-39.6251			457.433	-82.0905
									556.612	12.1214			547.499	-53.4367			561.165	-38.5615													457.989	-2.22044			457.472	-39.233			457.743	-82.8286
									557.072	12.8537			548.155	-53.5486			561.637	-39.046													458.47	-1.86541			457.972	-38.9096			458.384	-83.3034
									557.447	13.471			548.454	-53.3402			562.054	-39.4166													458.96	-1.20114			458.483	-38.7012			458.839	-83.5156
									558.068	13.8725			548.915	-52.8034			562.765	-39.7744													459.419	-0.23426			459.008	-38.6447			459.274	-83.4969
									558.587	13.9913			549.616	-51.9067			563.12	-40.109													459.856	0.93093			459.385	-38.6254			459.815	-83.3465
									559.087	13.7619			549.872	-50.7397			563.455	-40.42													460.478	2.19479			459.889	-38.5687			460.361	-83.208
									559.344	13.1442			550.559	-49.4519			564.252	-40.7398													461.139	3.33937			460.305	-38.3581			460.768	-83.1266
									560.036	12.1902			551.091	-48.1719			564.416	-41.0812													461.491	4.20981			460.872	-38.0089			461.353	-83.1779
									560.472	10.9698			551.634	-47.1045			565.079	-41.459													461.836	4.7329			461.506	-37.6025			461.755	-83.3313
									561.029	9.68847			551.954	-46.3912			565.584	-41.9165													462.563	4.96451			461.863	-37.2939			462.202	-83.5231
									561.228	8.54375			552.51	-46.1128			565.978	-42.4638													462.915	5.04351			462.432	-37.1815			462.783	-83.6535
									561.828	7.74787			553.116	-46.3427			566.671	-43.0556													463.419	5.04961			462.825	-37.3079			463.161	-83.7117
									562.213	7.44818			553.455	-47.0605			566.78	-43.592													463.859	5.03322			463.32	-37.6437			463.724	-83.7578
									562.861	7.61801			554.067	-48.2243			567.382	-43.9613													464.257	4.93141			463.956	-38.0872			464.195	-83.9347
									563.44	8.1338			554.476	-49.6757			568.068	-43.9873													465.161	4.64366			464.215	-38.5172			464.672	-84.4076
									563.765	8.79915			554.755	-51.126			568.42	-43.5527													465.412	4.17752			464.712	-38.8657			465.352	-85.3435
									564.316	9.42788			555.426	-52.3236			568.803	-42.6278													465.805	3.56922			465.29	-39.0703			465.667	-86.6967
									564.773	9.79765			555.772	-52.9342			569.381	-41.1847													466.18	2.9108			465.793	-39.1567			466.106	-88.28
									565.43	9.82072			556.215	-52.8137			569.98	-39.3661													466.769	2.26168			466.265	-39.2152			466.45	-89.7665
									565.88	9.44857			556.811	-51.9284			570.435	-37.348													467.421	1.64375			466.704	-39.314			466.99	-90.8616
									566.164	8.77528			557.299	-50.4624			571.052	-35.3788													467.789	1.07407			467.264	-39.548			467.537	-91.377
									566.775	7.9321			557.9	-48.6992			571.572	-33.6629													468.366	0.56457			467.717	-39.8952			467.895	-91.3441
									567.236	7.10415			558.386	-46.9583			571.941	-32.3173													468.676	0.18312			468.245	-40.3004			468.474	-90.9766
									567.624	6.4692			558.946	-45.5528			572.505	-31.4513													468.91	-0.02895			468.687	-40.6989			469.267	-90.5901
									568.112	6.09617			559.5	-44.6141			573.083	-31.0038													469.86	-0.08783			468.964	-41.0307			469.418	-90.4962
									568.751	6.00718			559.715	-44.1753			573.453	-30.9153													470.41	-0.01879			469.606	-41.3791			469.971	-90.9276
									569.145	6.0945			560.492	-44.2112			573.929	-31.0926													470.683	0.06745			470.29	-41.8471			470.533	-91.9357
									569.663	6.24134			560.774	-44.5715			574.461	-31.456													471.021	0.14508			470.682	-42.5507			471.009	-93.5025
									570.104	6.32028			561.331	-45.1846			574.979	-31.9244													471.688	0.1639			471.16	-43.5188			471.353	-95.4644
									570.658	6.2888			561.797	-45.9259			575.285	-32.429													472.168	0.13492			471.418	-44.681			471.914	-97.5741
									571.224	6.09486			562.318	-46.7141			575.969	-32.9499													472.707	0.04368			471.956	-45.8727			472.215	-99.5327
									571.483	5.77038			562.769	-47.4639			576.422	-33.4436													473.204	-0.13561			472.547	-46.955			472.771	-101.059
									572.181	5.42954			563.086	-48.0847			576.683	-33.9198													473.547	-0.31985			472.981	-47.8563			473.207	-102.043
									572.478	5.2186			563.726	-48.5489			577.475	-34.4138													474.117	-0.42368			473.48	-48.5679			473.693	-102.471
									573.074	5.3327			564.275	-48.8645			577.761	-34.9404													474.552	-0.40907			473.835	-49.1443			474.19	-102.433
									573.526	5.84422			564.618	-49.0522			578.307	-35.5741													474.983	-0.23164			474.475	-49.6861			474.857	-102.169
									573.932	6.74739			565.264	-49.2027			578.804	-36.3146													475.683	0.03306			474.947	-50.1861			475.281	-101.834
									574.442	7.8034			565.522	-49.2635			579.269	-37.1889													476.056	0.26673			475.422	-50.6223			475.654	-101.527
									575.249	8.74494			566.262	-49.2816			579.747	-38.1546													476.666	0.36409			475.758	-50.9401			476.145	-101.295
									575.614	9.26336			566.589	-49.2416			580.14	-39.1164													477.037	0.33444			476.383	-51.0398			476.679	-101.2
									576.168	9.2624			567.045	-49.1927			580.762	-39.9598													477.408	0.21455			476.796	-50.878			477.321	-101.263
									576.503	8.82578			567.654	-49.1791			581.117	-40.51													478.018	0.07042			477.302	-50.4074			477.624	-101.504
									576.745	8.10262			568.163	-49.2295			581.535	-40.6553													478.552	-0.05093			477.902	-49.6018			478.195	-101.871
									577.536	7.31446			568.63	-49.4033			582.205	-40.4482													479.051	-0.18135			478.362	-48.4975			478.678	-102.255
									577.964	6.59922			569.088	-49.5982			582.38	-40.0071													479.463	-0.33282			478.646	-47.1446			478.992	-102.558
									578.582	6.0664			569.355	-49.7221			583.319	-39.6185													479.876	-0.51023			479.419	-45.7009			479.525	-102.727
									578.811	5.81821			570.16	-49.6885			583.78	-39.4558													480.484	-0.72965			479.883	-44.3331			480.114	-102.816
									579.42	5.96173			570.502	-49.406			584.197	-39.6193													480.998	-0.89568			480.394	-43.2589			480.701	-102.946
									579.667	6.53859			571.061	-48.8828			584.509	-40.0008													481.457	-0.93024			480.969	-42.6138			481.123	-103.223
									580.371	7.45319			571.43	-48.139			584.901	-40.4427													481.83	-0.7343			481.359	-42.4616			481.513	-103.657
									581.034	8.45749			571.982	-47.3			585.474	-40.823													482.298	-0.27173			481.8	-42.7254			482.003	-104.172
									581.509	9.23726			572.69	-46.5331			586.142	-41.086													482.915	0.33861			482.311	-43.2532			482.45	-104.62
									581.895	9.59649			572.89	-45.9862			586.628	-41.3335													483.43	0.93059			482.726	-43.9644			482.999	-104.976
									582.455	9.48225			573.657	-45.7931			587.087	-41.6418													483.949	1.26318			483.313	-44.7823			483.432	-105.281
									582.837	9.12748			574.05	-45.9885			587.301	-41.9378													484.525	1.1825			483.739	-45.6812			484.067	-105.641
									583.22	8.77362			574.467	-46.5336			588.063	-42.1539													484.818	0.72133			484.293	-46.7056			484.478	-106.164
									583.757	8.67862			574.883	-47.3472			588.373	-42.0834													485.301	0.04756			484.673	-47.7656			484.932	-106.884
									584.398	8.88107			575.427	-48.3037			589.001	-41.6163													485.814	-0.53393			485.184	-48.782			485.428	-107.705
									584.729	9.3994			575.947	-49.3504			589.335	-40.8117													486.211	-0.8171			485.587	-49.6413			485.845	-108.489
									585.41	10.0481			576.422	-50.3999			589.852	-39.8388													486.799	-0.74285			485.969	-50.2818			486.247	-109.1
									585.753	10.7304			576.827	-51.3866			590.662	-39.01													487.202	-0.41035			486.785	-50.6954			486.891	-109.458
									586.329	11.3167			577.349	-52.2049			591.045	-38.524													487.9	-0.01359			487.046	-50.9366			487.378	-109.57
									586.741	11.7899			577.735	-52.6694			591.434	-38.5151													488.373	0.29862			487.55	-51.0559			487.806	-109.468
									587.382	12.1669			578.289	-52.7236			592.003	-38.9302													488.733	0.49917			488.169	-51.1037			488.26	-109.191
									587.776	12.5789			578.702	-52.2653			592.292	-39.6103													489.243	0.68072			488.446	-51.065			488.857	-108.785
									588.297	13.1775			579.343	-51.318			592.779	-40.422													489.595	0.96651			489.058	-50.9106			489.251	-108.295
									588.532	14.0877			579.805	-49.9987			593.481	-41.169													490.27	1.41155			489.516	-50.646			489.839	-107.763
									589.321	15.2577			580.226	-48.4802			593.811	-41.7587													490.755	1.92184			490.095	-50.3308			490.253	-107.275
									589.696	16.5883			580.852	-46.9679			594.437	-42.1318													491.217	2.36872			490.441	-50.0291			490.78	-106.904
									590.482	17.7633			581.38	-45.6301			594.546	-42.2612													491.8	2.5969			491.04	-49.8269			491.379	-106.735
									590.733	18.5157			581.815	-44.6469			595.368	-42.1704													492.266	2.54112			491.569	-49.8006			491.72	-106.84
									591.353	18.6319			582.478	-44.0653			595.728	-41.8924													492.627	2.23652			492.079	-49.8748			492.24	-107.221
									591.756	18.0321			582.718	-43.8507			596.375	-41.5722													493.116	1.81267			492.422	-49.9231			492.737	-107.862
									592.215	16.8247			583.261	-43.8717			596.886	-41.3241													493.693	1.43975			492.828	-49.7426			493.289	-108.741
									592.706	15.256			583.851	-43.9392			597.155	-41.1548													494.09	1.21862			493.497	-49.1633			493.586	-109.791
									593.321	13.6538			584.242	-43.9021			597.71	-40.9907													494.722	1.20878			493.904	-48.2012			494.191	-110.951
									593.342	12.3491			584.695	-43.6487			598.369	-40.7447													494.985	1.39406			494.348	-46.958			494.61	-112.156
									594.071	11.5253			585.12	-43.1762			598.623	-40.2878													495.565	1.72063			495.026	-45.687			495.127	-113.325
									594.528	11.2591			585.91	-42.6335			599.127	-39.64													496.195	2.05994			495.668	-44.6341			495.584	-114.381
									595.076	11.3896			586.184	-42.1646			599.698	-38.8936													496.616	2.28199			496.039	-43.9592			495.999	-115.24
									595.757	11.7288			586.844	-41.9828			600.43	-38.228													497.139	2.28233			496.371	-43.6291			496.499	-115.836
									596	12.0381			587.213	-42.1867			600.786	-37.7601													497.477	2.0518			496.855	-43.4681			497.039	-116.198
									596.587	12.235			587.739	-42.7921			601.136	-37.6058													498.103	1.62422			497.479	-43.3236			497.439	-116.375
									596.978	12.3269			588.212	-43.7049			601.592	-37.7685													498.581	1.07417			497.975	-43.0823			498.075	-116.467
									597.563	12.4046			588.619	-44.7744			602.319	-38.2163													498.933	0.49396			498.271	-42.7346			498.474	-116.516
									598.014	12.5364			589.06	-45.8473			602.642	-38.9278													499.485	-0.07636			498.949	-42.3426			499.011	-116.603
									598.485	12.7947			589.652	-46.8111			603.21	-39.775													500.009	-0.56634			499.541	-41.9481			499.403	-116.712
									598.99	13.131			589.954	-47.6678			603.667	-40.5832													500.462	-1.01183			499.921	-41.6351			499.898	-116.835
									599.503	13.532			590.707	-48.4465			603.892	-41.1516													501.003	-1.39196			500.278	-41.3954			500.446	-116.967
									600.03	13.9634			590.951	-49.1504			604.547	-41.3076													501.326	-1.70391			500.752	-41.2487			501.001	-117.076
									600.476	14.3651			591.647	-49.8378			605.071	-41.0157													501.907	-1.95822			501.562	-41.2433			501.376	-117.178
									600.935	14.7015			591.86	-50.4366			605.522	-40.2826													502.473	-2.1581			501.853	-41.4568			501.862	-117.267
									601.428	14.8965			592.496	-50.9212			606.116	-39.2302													502.925	-2.294			502.35	-41.9554			502.268	-117.346
									602.054	14.9322			592.973	-51.2811			606.657	-38.0085													503.337	-2.33945			502.888	-42.7099			502.965	-117.497
									602.485	14.7817			593.365	-51.4864			606.975	-36.7417													503.779	-2.27628			503.131	-43.6414			503.372	-117.79
									602.899	14.515			594.065	-51.6418			607.595	-35.5275													504.413	-2.14201			503.909	-44.6239			503.853	-118.285
									603.383	14.2059			594.332	-51.806			607.983	-34.5035													504.807	-1.958			504.17	-45.5087			504.357	-118.953
									603.786	13.9162			594.934	-52.0438			608.691	-33.8108													505.411	-1.78277			504.722	-46.1757			504.704	-119.684
									604.444	13.6777			595.496	-52.3805			609.286	-33.5626													505.846	-1.6315			505.111	-46.5633			505.349	-120.291
									604.917	13.4216			595.779	-52.7086			609.45	-33.8306													506.328	-1.44152			505.68	-46.7041			505.655	-120.634
									605.308	13.1054			596.416	-52.9641			609.998	-34.5183													506.688	-1.113			506.261	-46.6484			506.126	-120.639
									605.83	12.6704			596.833	-53.0402			610.582	-35.4137													507.326	-0.57645			506.651	-46.4402			506.768	-120.376
									606.389	12.167			597.078	-52.9716			610.993	-36.2561													507.795	0.20988			507.179	-46.1573			507.299	-119.989
									606.757	11.689			598.022	-52.8872			611.442	-36.7754													508.285	1.17132			507.562	-45.8448			507.738	-119.622
									607.267	11.404			598.295	-52.9589			611.778	-36.7962													508.735	2.14044			508.188	-45.6104			508.247	-119.324
									607.711	11.4914			598.992	-53.3481			612.393	-36.3051													509.4	2.93109			508.657	-45.5484			508.667	-119.073
									608.156	11.9801			599.259	-54.0715			612.973	-35.4014													509.826	3.36615			509.135	-45.7197			509.107	-118.767
									608.822	12.7956			599.658	-55.0553			613.553	-34.3178													510.279	3.32618			509.74	-46.1327			509.722	-118.334
									609.173	13.6984			600.217	-56.1632			613.987	-33.2452													510.713	2.75437			510.045	-46.6561			510.139	-117.749
									609.857	14.4103			600.668	-57.2374			614.4	-32.3344													511.37	1.66276			510.549	-47.1239			510.675	-117.027
									610.273	14.654			601.181	-58.2612			614.952	-31.7027													511.664	0.15311			510.91	-47.3426			511.217	-116.26
									610.903	14.2992			601.78	-59.145			615.469	-31.2885													512.186	-1.63613			511.452	-47.221			511.625	-115.52
									611.225	13.4454			602.068	-59.8129			615.992	-31.0563													512.663	-3.53175			512.207	-46.8665			512.21	-114.846
									611.512	12.3846			602.571	-60.1649			616.392	-30.9323													513.04	-5.32461			512.4	-46.4305			512.64	-114.243
									612.242	11.4623			603.074	-60.0011			616.87	-30.8635													513.606	-6.87914			513.169	-46.1759			513.125	-113.703
									612.546	10.9695			603.475	-59.3111			617.382	-30.8027													513.963	-8.06164			513.516	-46.1882			513.726	-113.186
									613.009	11.0396			604.099	-58.1506			617.86	-30.7695													514.612	-8.80444			514.022	-46.464			514.052	-112.679
									613.562	11.5427			604.553	-56.801			618.51	-30.7542													514.99	-9.09409			514.524	-46.8858			514.641	-112.189
									614.228	12.2009			605.322	-55.6144			618.881	-30.7737													515.418	-8.98335			514.828	-47.2174			515.133	-111.763
									614.702	12.6827			605.595	-54.8963			619.101	-30.8821													515.978	-8.61074			515.367	-47.3516			515.607	-111.503
									615.145	12.7774			606.221	-54.8118			620.027	-31.0947													516.619	-8.07209			515.984	-47.2243			516.157	-111.531
									615.631	12.4962			606.596	-55.3613			620.338	-31.4278													516.949	-7.46956			516.341	-46.9607			516.607	-111.929
									616.077	12.0448			607.01	-56.3857			620.825	-31.9242													517.601	-6.83893			517.124	-46.7052			517.117	-112.73
									616.477	11.6866			607.574	-57.6694			621.175	-32.5384													517.856	-6.10976			517.296	-46.5133			517.556	-113.822
									616.835	11.5754			607.912	-58.9814			621.897	-33.2547													518.488	-5.25224			517.975	-46.483			518.033	-115.009
									617.563	11.7522			608.514	-60.1357			622.113	-34.0127													518.892	-4.22802			518.421	-46.5073			518.422	-116.009
									618.139	12.0405			608.951	-61.0113			622.769	-34.7188													519.519	-3.14403			518.693	-46.5648			518.931	-116.529
									618.54	12.2217			609.386	-61.5539			623.303	-35.282													520.101	-2.08226			519.416	-46.5975			519.368	-116.396
									619.113	12.1658			609.819	-61.7649			623.508	-35.5897													520.448	-1.1741			519.8	-46.6654			519.924	-115.6
									619.359	11.9112			610.449	-61.663			624.132	-35.5947													520.937	-0.45988			520.524	-46.8709			520.421	-114.232
									619.983	11.5848			610.963	-61.359			624.745	-35.3456													521.544	0.1288			520.782	-47.2108			521.009	-112.567
									620.428	11.3953			611.348	-60.9113			625.006	-34.9191													521.875	0.64246			521.201	-47.6645			521.503	-110.891
									620.923	11.4831			611.869	-60.4129			625.775	-34.4952													522.487	1.12642			521.907	-48.1451			522.038	-109.495
									621.371	11.8625			612.383	-59.9659			626.207	-34.2224													522.893	1.59639			522.116	-48.5211			522.481	-108.543
									621.918	12.4706			612.872	-59.6173			626.618	-34.2482													523.508	1.98876			522.806	-48.7481			522.998	-108.12
									622.465	13.1266			613.48	-59.4131			627.122	-34.5271													523.919	2.26598			523.096	-48.7914			523.519	-108.143
									622.941	13.6914			613.797	-59.3581			627.592	-35.0847													524.509	2.41319			523.917	-48.693			524.057	-108.48
									623.455	14.0801			614.345	-59.4556			628.083	-35.8411													524.829	2.40302			524.224	-48.5234			524.189	-108.907
									623.969	14.2914			614.823	-59.6876			628.517	-36.7055													525.285	2.22045			524.483	-48.3205			524.96	-109.298
									624.258	14.4309			615.246	-60.0743			629.111	-37.6356													526.065	1.84473			525.346	-48.208			525.367	-109.594
									624.893	14.6136			615.873	-60.6284			629.493	-38.5043													526.315	1.24818			525.672	-48.2064			525.928	-109.826
									625.412	14.9229			616.402	-61.2846			629.962	-39.1128													526.913	0.49793			526.252	-48.4426			526.33	-110.108
									625.747	15.3615			616.675	-61.9935			630.47	-39.348													527.304	-0.28527			526.616	-48.9726			526.943	-110.524
									626.41	15.8875			617.113	-62.6222			630.707	-39.0839													527.761	-0.92325			527.153	-49.7584			527.293	-111.133
									626.897	16.3841			617.723	-63.0862			631.57	-38.4135													528.126	-1.27664			527.659	-50.7619			527.847	-111.921
									627.357	16.7563			618.209	-63.35			631.926	-37.5226													528.868	-1.32093			528.009	-51.8815			528.18	-112.822
									627.813	16.9144			618.634	-63.449			632.479	-36.7039													529.272	-1.13503			528.573	-52.9894			528.875	-113.779
									628.328	16.7878			619.257	-63.4763			633.126	-36.1743													529.679	-0.87382			529.101	-53.9669			529.231	-114.684
									628.782	16.377			619.722	-63.4451			633.483	-35.9936													530.368	-0.70631			529.317	-54.6497			529.616	-115.559
									629.45	15.768			619.988	-63.3888			633.819	-36.118													530.776	-0.68015			530.117	-55.003			530.26	-116.33
									629.75	15.0437			620.734	-63.2597			634.423	-36.356													531.167	-0.74071			530.406	-54.9671			530.637	-116.993
									630.094	14.3408			621.058	-63.0236			634.799	-36.6014													531.706	-0.76055			530.87	-54.6418			531.234	-117.524
									630.697	13.7658			621.645	-62.6971			635.48	-36.7644													532.106	-0.68252			531.453	-54.1895			531.582	-117.926
									631.185	13.2763			622.067	-62.3373			635.792	-36.8406													532.735	-0.51726			532.133	-53.8368			532.08	-118.199
									631.803	12.8658			622.689	-62.032			636.503	-36.9014													533.101	-0.40409			532.421	-53.7471			532.646	-118.382
									632.264	12.4603			623.112	-61.8155			636.781	-36.9472													533.797	-0.55742			533.154	-53.9144			533.034	-118.559
									632.571	12.0459			623.514	-61.6968			637.236	-37.0295													534.232	-1.11925			533.159	-54.2888			533.734	-118.831
									633.026	11.6587			624.235	-61.6602			637.901	-37.1788													534.58	-2.16775			533.976	-54.6743			534.026	-119.227
									633.684	11.3659			624.398	-61.6075			638.258	-37.4497													535.185	-3.6632			534.332	-54.9513			534.554	-119.727
									634.15	11.1524			625.054	-61.496			638.937	-37.9252													535.396	-5.40871			534.823	-55.1476			535.042	-120.227
									634.556	11.0325			625.604	-61.3558			639.174	-38.636													536.229	-7.12304			535.397	-55.3282			535.505	-120.577
									635.148	10.9268			625.973	-61.1938			639.783	-39.5865													536.427	-8.56312			535.93	-55.6798			535.969	-120.632
									635.432	10.7581			626.569	-61.1366			640.248	-40.7086													536.929	-9.47342			536.378	-56.3425			536.377	-120.272
									636.186	10.5158			627.003	-61.2457			640.706	-41.8213													537.348	-9.72076			536.717	-57.349			537.065	-119.485
									636.598	10.245			627.561	-61.5972			641.13	-42.7938													537.912	-9.35056			537.446	-58.5717			537.454	-118.356
									636.981	10.0591			628.022	-62.1322			641.543	-43.4599													538.498	-8.61793			537.602	-59.8387			537.992	-117.05
									637.412	10.0798			628.334	-62.7887			642.131	-43.8511													539.053	-7.80754			538.248	-60.8996			538.456	-115.81
									638.015	10.3133			628.999	-63.4629			642.578	-44.0923													539.503	-7.16636			538.623	-61.6131			539.042	-114.804
									638.385	10.7271			629.408	-63.9834			643.042	-44.3556													539.904	-6.83058			539.076	-61.9049			539.684	-114.216
									639.098	11.2079			629.813	-64.2836			643.873	-44.871													540.582	-6.70004			539.692	-61.8916			539.949	-114.106
									639.605	11.6479			630.448	-64.2518			644.09	-45.6487													540.813	-6.63415			540.225	-61.7788			540.403	-114.462
									639.993	11.9901			630.797	-63.8627			644.435	-46.6124													541.244	-6.38784			540.69	-61.8156			540.91	-115.196
									640.349	12.2947			631.38	-63.2154			644.971	-47.4908													541.993	-5.8825			541.135	-62.1816			541.504	-116.225
									640.878	12.5902			631.738	-62.4687			645.378	-48.0426													542.47	-5.12291			541.683	-62.9445			541.992	-117.479
									641.455	12.9378			632.519	-61.879			646.053	-48.1602													542.855	-4.23563			542.18	-64.0195			542.338	-118.771
									642.104	13.2676			632.962	-61.6191			646.376	-47.8774													543.324	-3.37605			542.434	-65.1398			542.715	-119.927
									642.35	13.4574			633.393	-61.8091			646.915	-47.4229													543.977	-2.71586			543.047	-66.0838			543.351	-120.726
									642.967	13.4274			633.882	-62.4277			647.634	-47.0498													544.441	-2.35821			543.448	-66.6295			543.8	-121.006
									643.401	13.1888			634.15	-63.2851			647.953	-46.9918													544.925	-2.31025			543.886	-66.7364			544.226	-120.675
									643.925	12.782			634.746	-64.2813			648.541	-47.3428													545.353	-2.4716			544.523	-66.5028			544.656	-119.734
									644.356	12.2954			635.32	-65.3223			648.836	-48.0173													545.808	-2.60705			545.042	-66.1399			545.364	-118.34
									644.81	11.7749			635.771	-66.3518			649.397	-48.8911													546.287	-2.54811			545.595	-65.8809			545.905	-116.723
									645.252	11.2461			636.27	-67.3217			649.889	-49.7625													546.774	-2.20155			545.936	-65.9163			546.213	-115.136
									645.929	10.6942			636.568	-68.0909			650.211	-50.4844													547.277	-1.54909			546.417	-66.3151			546.849	-113.785
									646.42	10.1445			637.242	-68.5415			650.894	-50.9982													547.899	-0.73559			547	-67.0755			547.378	-112.848
									646.691	9.67152			637.493	-68.5267			651.316	-51.2718													548.357	0.03152			547.441	-68.0892			547.903	-112.398
									647.138	9.34323			637.955	-68.0612			651.811	-51.3667													548.818	0.59646			547.898	-69.2674			548.284	-112.45
									647.694	9.17641			638.892	-67.2416			652.205	-51.3091													549.272	0.85164			548.274	-70.4064			548.724	-112.932
									648.334	9.11861			639.15	-66.2292			652.831	-51.1373													549.782	0.69891			548.845	-71.3464			549.271	-113.76
									648.807	9.02916			639.685	-65.2184			653.302	-50.9447													550.349	0.10758			549.295	-71.9416			549.813	-114.807
									649.168	8.79719			640.07	-64.3016			653.635	-50.8165													550.791	-0.91132			549.765	-72.0947			550.203	-115.998
									649.728	8.41723			640.579	-63.5636			654.35	-50.8847													551.207	-2.24317			550.15	-71.8376			550.614	-117.219
									650.177	7.94217			641.229	-63.1031			654.81	-51.1734													551.769	-3.6235			550.832	-71.3275			551.183	-118.4
									650.621	7.49959			641.679	-63.018			655.247	-51.6449													552.146	-4.74694			551.274	-70.8389			551.549	-119.54
									651.182	7.19797			642.22	-63.4118			655.693	-52.2446													552.439	-5.29955			551.916	-70.6683			552.153	-120.651
									651.459	7.10102			642.528	-64.2387			655.996	-52.8299													553.084	-5.1399			552.231	-71.0178			552.647	-121.762
									652.172	7.14328			643.118	-65.4052			656.677	-53.3614													553.675	-4.30674			552.85	-72.0059			553.066	-122.873
									652.725	7.21881			643.592	-66.6586			657.193	-53.7724													554.134	-3.01859			553.21	-73.5428			553.423	-123.934
									653.109	7.22206			643.875	-67.7374			657.721	-54.0784													554.717	-1.56662			553.623	-75.4651			554.079	-124.861
									653.467	7.10622			644.43	-68.4772			658.134	-54.2178													555.178	-0.21073			554.106	-77.4871			554.463	-125.519
									654.16	6.90532			644.922	-68.8196			658.391	-54.1096													555.577	0.86839			554.599	-79.3661			554.934	-125.786
									654.538	6.65793			645.471	-68.8864			659.038	-53.7366													556.21	1.57383			555.017	-80.9194			555.411	-125.59
									655.086	6.47461			646.015	-68.8649			659.687	-53.0485													556.609	1.90443			555.478	-82.0206			555.95	-124.94
									655.402	6.44559			646.478	-68.9268			660.07	-52.1525													557.266	1.90067			555.943	-82.641			556.418	-123.91
									656.019	6.63914			646.987	-69.219			660.659	-51.2219													557.552	1.67938			556.586	-82.8521			556.97	-122.673
									656.548	7.15296			647.244	-69.728			660.922	-50.3926													558.053	1.35108			556.883	-82.8106			557.471	-121.41
									657.022	7.98172			648.069	-70.4033			661.727	-49.8377													558.536	1.03474			557.534	-82.757			558.044	-120.338
									657.44	9.12404			648.288	-71.1289			662.128	-49.5736													559.056	0.79467			557.921	-82.8662			558.462	-119.584
									657.875	10.4634			648.789	-71.7699			662.594	-49.6205													559.606	0.58246			558.606	-83.3276			558.96	-119.279
									658.594	11.764			649.351	-72.2756			663.056	-49.8982													560.033	0.34098			559.054	-84.1292			559.452	-119.453
									659.071	12.7189			649.75	-72.6118			663.306	-50.3344													560.472	0.02495			559.257	-85.1469			559.974	-120.07
									659.635	13.1001			650.292	-72.8282			664.139	-50.9107													561.135	-0.37476			559.874	-86.1402			560.442	-121.023
									660.08	12.8304			650.868	-73.006			664.621	-51.6092													561.424	-0.78204			560.268	-86.8448			560.86	-122.144
									660.414	12.0137			651.172	-73.2214			664.878	-52.3751													561.922	-1.13484			560.873	-87.1148			561.302	-123.256
									660.96	10.9327			651.803	-73.5659			665.503	-53.147													562.429	-1.37513			561.249	-86.9513			561.817	-124.174
									661.334	9.95169			652.313	-74.0335			665.783	-53.7842													562.913	-1.61723			561.72	-86.4955			562.145	-124.798
									661.84	9.30526			652.664	-74.5951			666.496	-54.2447													563.521	-1.9641			562.525	-85.9676			562.906	-125.106
									662.357	9.11548			653.215	-75.0751			666.761	-54.4809													563.958	-2.52595			562.764	-85.5374			563.351	-125.131
									662.877	9.29973			653.612	-75.3806			667.369	-54.5773													564.407	-3.29422			563.433	-85.2955			563.634	-124.947
									663.399	9.6718			654.132	-75.4697			667.962	-54.6321													564.885	-4.13595			563.764	-85.1993			564.218	-124.645
									663.829	10.0482			654.591	-75.3807			668.473	-54.6684													565.31	-4.83647			564.12	-85.1348			564.789	-124.309
									664.52	10.2759			655.139	-75.2768			668.789	-54.6711													565.711	-5.17336			564.801	-85.0469			565.355	-123.986
									664.735	10.2722			655.84	-75.2814			669.234	-54.4522													566.278	-5.00418			565.301	-84.8542			565.652	-123.718
									665.279	10.0018			656.162	-75.4348			669.704	-53.9609													566.93	-4.34672			565.841	-84.6141			566.259	-123.471
									665.942	9.46461			656.552	-75.6747			670.367	-53.1903													567.228	-3.35826			566.132	-84.3704			566.697	-123.117
									666.221	8.72428			656.921	-75.8676			670.826	-52.2629													567.809	-2.29113			566.732	-84.2148			567.192	-122.527
									666.845	7.84498			657.557	-75.9526			671.399	-51.4589													568.318	-1.44742			567.232	-84.2526			567.637	-121.666
									667.237	6.98581			658.125	-75.9837			671.875	-50.9138													568.926	-1.08195			567.809	-84.5343			568.196	-120.52
									667.675	6.28567			658.578	-76.1257			672.311	-50.7553													569.38	-1.32777			568.202	-85.1589			568.666	-119.253
									668.092	5.879			659.158	-76.5583			672.837	-50.8983													569.777	-2.15094			568.695	-86.0788			569.225	-118.106
									668.691	5.76305			659.5	-77.3644			673.19	-51.1642													570.288	-3.35455			569.04	-87.2693			569.91	-117.277
									669.223	5.8279			660.011	-78.5614			673.932	-51.3662													570.614	-4.62396			569.726	-88.6629			570.242	-116.885
									669.669	5.91596			660.381	-80.0382			673.923	-51.4045													571.173	-5.69497			570.034	-90.1672			570.542	-116.921
									670.206	5.87183			660.96	-81.6555			674.759	-51.3034													571.641	-6.39179			570.517	-91.7095			571.221	-117.335
									670.747	5.67787			661.454	-83.2734			675.435	-51.174													572.158	-6.65892			571.042	-93.1937			571.705	-118.005
									671.047	5.43238			661.795	-84.7393			675.652	-51.1707													572.682	-6.59444			571.531	-94.5554			572.066	-118.849
									671.603	5.24532			662.371	-85.9351			676.338	-51.3874													573.104	-6.35495			571.961	-95.6796			572.684	-119.852
									671.945	5.24044			662.706	-86.7682			676.607	-51.8008													573.668	-6.08095			572.249	-96.5316			573.067	-120.963
									672.652	5.3914			663.202	-87.2332			677.127	-52.2759													574.177	-5.86141			572.964	-97.1444			573.543	-122.08
									673.116	5.60231			663.874	-87.4319			677.663	-52.7099													574.567	-5.71881			573.403	-97.6726			574.057	-123.093
									673.706	5.76344			664.231	-87.5056			678.107	-53.0275													575.165	-5.59912			573.962	-98.3166			574.496	-123.831
									674.001	5.84752			664.886	-87.666			678.607	-53.2639													575.588	-5.40878			574.422	-99.2322			574.946	-124.142
									674.481	5.92056			665.208	-88.0461			679.051	-53.4399													576.023	-5.04233			574.87	-100.44			575.368	-123.925
									675.067	6.01463			665.68	-88.7369			679.758	-53.6583													576.513	-4.46197			575.328	-101.867			575.946	-123.24
									675.479	6.19693			666.245	-89.7521			680.102	-53.8773													577.15	-3.70171			575.669	-103.3			576.647	-122.184
									675.97	6.4038			666.739	-91.0306			680.502	-53.9704													577.541	-2.90625			576.233	-104.571			576.876	-120.922
									676.618	6.5198			667.158	-92.5132			680.878	-53.8146													578.108	-2.23607			576.689	-105.526			577.439	-119.692
									677.061	6.46417			667.554	-93.996			681.611	-53.3051													578.598	-1.85777			577.212	-106.132			578.11	-118.638
									677.474	6.19799			668.017	-95.3523			682.031	-52.5241													579.078	-1.83052			577.711	-106.491			578.503	-117.879
									677.921	5.82057			668.611	-96.4001			682.507	-51.636													579.616	-2.12972			578.073	-106.695			579.042	-117.437
									678.391	5.42937			668.954	-97.044			683.065	-50.8763													579.913	-2.68146			578.734	-106.924			579.348	-117.288
									679.032	5.1399			669.448	-97.3148			683.648	-50.4347													580.535	-3.37628			579.207	-107.281			580.038	-117.382
									679.247	4.94195			670.019	-97.2815			684.153	-50.3844													580.929	-4.10667			579.588	-107.832			580.414	-117.663
									680.021	4.83207			670.511	-97.1232			684.471	-50.6808													581.532	-4.81474			580.251	-108.551			580.894	-118.105
									680.391	4.77002			671.117	-97.0069			684.825	-51.1213													581.927	-5.4809			580.438	-109.336			581.52	-118.646
									680.912	4.72886			671.344	-97.0427			685.491	-51.5741													582.423	-6.04775			581.024	-110.111			581.844	-119.209
									681.332	4.67865			672.124	-97.282			686.053	-51.9124													582.851	-6.47129			581.587	-110.804			582.32	-119.745
									681.777	4.60368			672.319	-97.6588			686.402	-52.0948													583.4	-6.68301			581.984	-111.373			582.786	-120.196
									682.358	4.43442			673.018	-98.087			686.911	-52.1234													583.913	-6.59769			582.611	-111.807			583.373	-120.544
									682.869	4.02741			673.402	-98.4668			687.356	-52.06													584.386	-6.1571			582.915	-112.053			583.841	-120.842
									683.442	3.26939			673.78	-98.7112			687.945	-52.0238													584.716	-5.30841			583.48	-112.082			584.295	-121.152
									683.703	2.10964			674.372	-98.8933			688.442	-52.1072													585.359	-4.15808			583.896	-111.855			584.815	-121.525
									684.305	0.6079			674.892	-99.0929			688.844	-52.4261													585.953	-2.81931			584.377	-111.426			585.231	-121.94
									684.703	-1.0995			675.432	-99.4711			689.531	-53.0191													586.38	-1.48234			585.045	-111.002			585.819	-122.337
									685.21	-2.77485			675.936	-100.136			689.778	-53.8369													586.882	-0.36268			585.51	-110.765			586.188	-122.632
									685.587	-4.21082			676.217	-101.052			690.253	-54.757													587.446	0.43262			585.946	-110.942			586.651	-122.778
									686.048	-5.25859			676.836	-102.134			690.839	-55.5864													587.86	0.84991			586.543	-111.571			587.21	-122.799
									686.662	-5.84189			677.232	-103.151			691.216	-56.2055													588.362	0.90884			586.888	-112.53			587.703	-122.765
									687.034	-6.04415			677.649	-103.967			691.739	-56.5648													588.808	0.70619			587.332	-113.61			588.276	-122.774
									687.568	-5.97099			678.28	-104.412			692.11	-56.6963													589.433	0.34639			587.732	-114.526			588.659	-122.838
									688.183	-5.75531			678.519	-104.459			692.881	-56.7654													589.723	-0.05671			588.229	-115.153			589.215	-122.924
									688.53	-5.44984			679.319	-104.208			693.285	-56.8673													590.235	-0.45112			588.904	-115.427			589.545	-122.927
									689.123	-5.07347			679.684	-103.829			693.666	-57.1003													590.922	-0.75823			589.251	-115.467			590.069	-122.692
									689.505	-4.50638			680.112	-103.57			694.157	-57.4839													591.109	-0.9468			589.843	-115.404			590.714	-122.195
									690.007	-3.70211			680.744	-103.59			694.664	-57.9614													591.811	-1.00607			590.241	-115.363			591.066	-121.397
									690.415	-2.64399			681.284	-103.996			695.255	-58.504													592.257	-0.97948			590.776	-115.421			591.616	-120.382
									691.184	-1.50037			681.76	-104.758			695.502	-59.0749													592.677	-0.90039			591.285	-115.578			592.155	-119.31
									691.559	-0.49812			681.929	-105.666			696.085	-59.6691													593.223	-0.84993			591.68	-115.827			592.598	-118.296
									692.113	0.15235			682.48	-106.552			696.78	-60.33													593.728	-0.88034			592.285	-116.101			593.21	-117.487
									692.62	0.33772			683.076	-107.274			696.944	-61.0477													594.268	-1.01135			592.593	-116.374			593.611	-117.001
									693.087	0.12818			683.602	-107.779			697.616	-61.8371													594.647	-1.18677			593.279	-116.639			594.062	-116.954
									693.402	-0.2586			684.107	-108.134			697.993	-62.5883													595.149	-1.37485			593.587	-116.921			594.775	-117.363
									693.993	-0.60703			684.372	-108.356			698.534	-63.2262													595.565	-1.51861			594.214	-117.262			594.962	-118.179
									694.345	-0.74789			685.114	-108.517			698.948	-63.7018													596.205	-1.53705			594.643	-117.719			595.615	-119.229
									695.051	-0.63315			685.438	-108.638			699.397	-63.9699													596.62	-1.48025			595.079	-118.315			596.14	-120.229
									695.454	-0.3357			685.863	-108.75			699.999	-64.0726													597.151	-1.3521			595.767	-119.1			596.276	-120.89
									695.999	-0.00701			686.616	-108.91			700.499	-64.0763													597.581	-1.17876			595.9	-120.031			596.872	-120.999
									696.419	0.24014			686.934	-109.171			700.896	-64.1355													598.039	-0.97243			596.605	-121.081			597.468	-120.517
									696.904	0.27317			687.469	-109.585			701.494	-64.3524													598.617	-0.75971			597.035	-122.237			598.035	-119.586
									697.456	0.04243			687.87	-110.125			701.844	-64.7747													599.161	-0.5257			597.509	-123.476			598.497	-118.464
									697.983	-0.4235			688.374	-110.761			702.489	-65.4616													599.538	-0.26455			598.006	-124.826			598.999	-117.427
									698.431	-1.04149			688.951	-111.426			702.944	-66.325													599.965	0.01059			598.337	-126.258			599.537	-116.647
									698.736	-1.6781			689.247	-112.099			703.205	-67.3287													600.591	0.27192			598.955	-127.772			600	-116.125
									699.312	-2.19432			689.849	-112.836			703.795	-68.4148													601.082	0.40897			599.52	-129.325			600.402	-115.857
									699.787	-2.56731			690.361	-113.674			704.303	-69.527													601.524	0.37359			599.684	-130.851			600.957	-115.754
									700.33	-2.85941			690.819	-114.7			704.87	-70.6506													602.029	0.10929			600.318	-132.277			601.435	-115.739
									700.862	-3.19749			691.236	-115.936			705.227	-71.6854													602.627	-0.32569			600.793	-133.498			601.893	-115.872
									701.314	-3.67465			691.754	-117.325			705.706	-72.5276													602.887	-0.80332			601.291	-134.47			602.498	-116.213
									701.773	-4.27011			692.3	-118.766			706.121	-73.0698													603.416	-1.17505			601.726	-135.094			602.929	-116.835
									702.292	-4.82276			692.513	-120.129			706.512	-73.1927													603.873	-1.35873			602.156	-135.363			603.312	-117.785
									702.583	-5.14255			693.117	-121.298			707.294	-72.97													604.454	-1.35767			602.661	-135.293			603.868	-119.016
									703.117	-5.08533			693.615	-122.253			707.714	-72.5159													605.051	-1.24435			603.262	-134.981			604.438	-120.402
									703.666	-4.69244			694.138	-122.994			708.072	-72.0343													605.38	-1.08526			603.681	-134.634			604.749	-121.747
									704.302	-4.17349			694.616	-123.62			708.755	-71.7489													605.937	-0.90549			604.226	-134.403			605.103	-122.858
									704.712	-3.79599			694.99	-124.156			709.137	-71.7377													606.35	-0.67158			604.792	-134.464			605.702	-123.664
									705.298	-3.76962			695.613	-124.666			709.773	-71.9952													606.82	-0.37298			605.163	-134.92			606.231	-124.173
									705.675	-4.15797			695.964	-125.149			710.082	-72.4106													607.374	-0.05506			605.623	-135.748			606.757	-124.499
									706.09	-4.87559			696.544	-125.622			710.39	-72.9347													607.988	0.21589			606.18	-136.934			607.283	-124.777
									706.643	-5.73018			696.943	-126.096			711.156	-73.5165													608.401	0.30116			606.522	-138.381			607.637	-125.036
									707.021	-6.56609			697.576	-126.573			711.539	-74.2165													608.793	0.14757			607.1	-140.047			608.135	-125.249
									707.609	-7.25986			697.888	-127.112			712.162	-75.1274													609.319	-0.21509			607.601	-141.891			608.598	-125.364
									708.045	-7.80232			698.466	-127.725			712.614	-76.2613													609.927	-0.68973			607.856	-143.839			609.092	-125.342
									708.579	-8.20681			698.83	-128.467			712.863	-77.5906													610.245	-1.10294			608.614	-145.821			609.709	-125.19
									708.993	-8.52455			699.557	-129.37			713.384	-78.9414													610.734	-1.34199			608.809	-147.675			610.087	-125.023
									709.528	-8.77375			699.808	-130.463			713.898	-80.1505													611.235	-1.27875			609.33	-149.295			610.636	-124.952
									710.022	-8.95143			700.364	-131.766			714.534	-81.0769													611.727	-0.95487			609.949	-150.55			611.142	-125.013
									710.431	-9.00299			700.832	-133.18			714.723	-81.6628													612.319	-0.47217			610.123	-151.403			611.533	-125.21
									711.051	-8.85023			701.283	-134.601			715.326	-81.9674													612.775	0.0543			610.863	-151.937			612.078	-125.517
									711.411	-8.44615			701.734	-135.877			715.829	-82.1043													613.22	0.50152			611.331	-152.238			612.557	-125.919
									711.883	-7.77907			702.149	-136.931			716.449	-82.1874													613.801	0.76753			611.8	-152.468			612.995	-126.425
									712.41	-6.97325			702.698	-137.729			716.934	-82.3768													614.207	0.80802			612.395	-152.719			613.496	-127.065
									713.056	-6.16124			703.139	-138.337			717.088	-82.7605													614.715	0.62028			612.553	-152.985			614.114	-127.874
									713.55	-5.51972			703.76	-138.832			717.942	-83.4033													615.121	0.23369			613.4	-153.256			614.471	-128.844
									713.953	-5.13362			704.256	-139.322			718.227	-84.2468													615.863	-0.34436			613.634	-153.406			614.854	-129.945
									714.444	-5.00787			704.526	-139.823			718.874	-85.2028													616.148	-1.03421			614.171	-153.434			615.411	-131.114
									714.834	-5.05721			705.044	-140.436			719.22	-86.1405													616.5	-1.71222			614.792	-153.321			615.946	-132.221
									715.423	-5.18974			705.597	-141.221			719.483	-86.8829													617.162	-2.25838			615.076	-153.07			616.425	-133.101
									715.928	-5.36388			706.198	-142.252			720.123	-87.4368													617.645	-2.55723			615.773	-152.795			616.754	-133.598
									716.449	-5.51233			706.64	-143.56			720.741	-87.8364													618.018	-2.56383			616.204	-152.569			617.261	-133.591
									716.772	-5.6615			706.991	-145.077			721.257	-88.2132													618.527	-2.33564			616.587	-152.558			617.744	-133.086
									717.365	-5.84731			707.421	-146.667			721.722	-88.6684													619.117	-1.95359			617.182	-152.935			618.282	-132.2
									717.845	-6.08377			707.885	-148.131			721.865	-89.2353													619.655	-1.5341			617.664	-153.831			619.014	-131.141
									718.348	-6.41595			708.344	-149.349			722.726	-89.9145													620.053	-1.10415			618.348	-155.298			619.37	-130.141
									718.831	-6.83219			709.02	-150.283			723.115	-90.5391													620.524	-0.67692			618.541	-157.164			619.774	-129.322
									719.335	-7.29232			709.353	-150.95			723.433	-90.9869													621.056	-0.15724			618.935	-159.17			620.304	-128.669
									719.755	-7.70512			709.816	-151.462			724.125	-91.0667													621.494	0.46608			619.414	-160.971			620.847	-128.044
									720.112	-7.97233			710.34	-151.943			724.41	-90.6595													621.988	1.14196			619.827	-162.299			621.35	-127.253
									720.807	-8.00241			710.832	-152.492			724.952	-89.8036													622.597	1.72424			620.473	-163.13			621.779	-126.128
									721.261	-7.82261			711.372	-153.2			725.493	-88.5345													623.07	2.00276			620.922	-163.578			622.107	-124.636
									721.626	-7.4803			711.782	-154.102			726.103	-87.0715													623.57	1.78552			621.475	-163.908			622.795	-122.921
									722.324	-7.1277			712.328	-155.134			726.636	-85.6437													623.992	1.00553			621.855	-164.356			623.547	-121.26
									722.66	-6.9208			712.755	-156.114			727.05	-84.4441													624.576	-0.21399			622.507	-165.04			623.846	-119.998
									723.248	-6.90639			713.059	-156.848			727.57	-83.6591													624.931	-1.60603			622.881	-165.942			624.352	-119.391
									723.769	-7.10811			713.649	-157.171			727.985	-83.273													625.343	-2.80281			623.223	-166.927			624.921	-119.597
									724.133	-7.45739			714.199	-156.968			728.607	-83.2601													625.737	-3.51446			623.735	-167.898			625.344	-120.542
									724.584	-7.80219			714.595	-156.337			729.187	-83.5291													626.386	-3.59676			624.277	-168.814			625.725	-122.031
									725.171	-8.04952			715.257	-155.458			729.24	-83.9152													626.859	-3.12977			624.781	-169.728			626.199	-123.78
									725.494	-8.16282			715.718	-154.598			730.093	-84.2789													627.375	-2.35859			625.327	-170.752			626.754	-125.558
									726.196	-8.11266			716.147	-153.989			730.39	-84.508													627.937	-1.53502			625.69	-171.94			627.062	-127.194
									726.723	-7.95571			716.678	-153.794			730.916	-84.6296													628.423	-0.85693			626.209	-173.315			627.608	-128.642
									726.881	-7.79162			717.362	-154.119			731.486	-84.7259													628.905	-0.38881			626.611	-174.736			628.17	-129.911
									727.687	-7.63835			717.633	-154.883			731.875	-84.9667													629.221	-0.10783			627.122	-176.078			628.684	-130.967
									728.1	-7.50343			717.951	-155.982			732.531	-85.5271													629.857	0.07722			627.546	-177.131			628.938	-131.88
									728.485	-7.34551			718.643	-157.282			732.936	-86.4947													630.329	0.15677			628.046	-177.74			629.556	-132.646
									729.16	-7.10114			719.022	-158.657			733.391	-87.8593													630.846	0.06521			628.529	-177.872			629.973	-133.251
									729.475	-6.72614			719.596	-160.086			733.727	-89.4925													631.352	-0.34782			628.977	-177.582			630.601	-133.715
									729.886	-6.21079			719.897	-161.593			734.275	-91.1553													631.771	-1.15686			629.521	-177.033			630.965	-134.068
									730.588	-5.57721			720.49	-163.203			734.881	-92.6387													632.31	-2.34767			630.143	-176.476			631.487	-134.322
									731.167	-4.93117			721.064	-164.927			735.087	-93.7211													632.799	-3.77811			630.496	-176.176			631.975	-134.437
									731.504	-4.3596			721.266	-166.722			735.633	-94.3085													633.183	-5.14323			631.227	-176.358			632.339	-134.358
									731.908	-3.90026			721.939	-168.507			736.141	-94.4222													633.539	-6.14909			631.444	-177.118			633.091	-134.036
									732.54	-3.65308			722.223	-170.181			736.697	-94.2308													634.101	-6.55978			631.929	-178.476			633.344	-133.466
									733.057	-3.59217			722.75	-171.699			737.261	-93.9562													634.593	-6.31318			632.567	-180.332			633.843	-132.705
									733.501	-3.73219			723.368	-173.067			737.79	-93.7843													635.211	-5.52652			632.909	-182.522			634.472	-131.901
									733.95	-4.04168			723.683	-174.32			738.116	-93.83													635.646	-4.42291			633.315	-184.894			635.018	-131.17
									734.426	-4.47819			724.239	-175.528			738.56	-94.1026													636.151	-3.26977			633.779	-187.232			635.525	-130.641
									734.94	-4.92825			724.681	-176.733			739.239	-94.5169													636.712	-2.27172			634.297	-189.419			635.88	-130.311
									735.45	-5.32664			725.144	-177.986			739.546	-95.0057													637.105	-1.55814			634.692	-191.357			636.289	-130.155
									735.807	-5.57504			725.667	-179.294			740.074	-95.475													637.748	-1.03996			635.162	-193.015			636.937	-130.099
									736.421	-5.61355			726.155	-180.631			740.662	-95.9433													638.12	-0.59144			635.75	-194.47			637.454	-130.053
									736.81	-5.4587			726.514	-181.993			740.958	-96.3789													638.518	-0.04655			636.113	-195.725			637.876	-130.033
									737.38	-5.18767			726.989	-183.355			741.571	-96.7751													639.132	0.67673			636.605	-196.86			638.282	-130.041
									737.836	-4.85713			727.616	-184.745			742.064	-97.1503													639.5	1.55836			637.238	-197.901			638.809	-130.153
									738.516	-4.56717			727.96	-186.166			742.512	-97.5375													640.173	2.45249			637.393	-198.839			639.438	-130.487
									738.661	-4.33283			728.467	-187.662			742.838	-97.9893													640.745	3.16225			638.146	-199.677			639.835	-131.052
									739.423	-4.11952			728.937	-189.246			743.603	-98.6102													641.217	3.56514			638.476	-200.451			640.37	-131.854
									739.818	-3.90835			729.438	-190.891			743.995	-99.4813													641.401	3.67111			639.058	-201.247			640.749	-132.727
									740.251	-3.66519			729.86	-192.516			744.548	-100.585													642.162	3.61591			639.564	-202.122			641.103	-133.526
									740.773	-3.40615			730.265	-194.002			744.773	-101.847													642.561	3.57819			639.858	-203.16			641.774	-134.084
									741.327	-3.25133			730.866	-195.27			745.299	-103.182													643.023	3.73755			640.546	-204.387			642.195	-134.327
									741.799	-3.27949			731.194	-196.28			745.881	-104.472													643.477	4.07964			640.972	-205.725			642.615	-134.304
									742.425	-3.53501			731.642	-197.082			746.303	-105.738													644.003	4.48666			641.378	-207.048			643.307	-134.165
									742.636	-3.98148			732.419	-197.82			746.776	-106.964													644.659	4.77067			641.741	-208.212			643.598	-134.109
									743.168	-4.50279			732.704	-198.62			747.35	-108.168													645.048	4.77351			642.3	-209.048			644.336	-134.288
									743.807	-4.92647			733.27	-199.598			747.774	-109.256													645.572	4.43551			642.853	-209.615			644.554	-134.745
									744.095	-5.15675			733.625	-200.786			748.123	-110.113													646.025	3.86042			643.192	-210.014			645.265	-135.428
									744.636	-5.10392			734.091	-202.141			748.525	-110.601													646.338	3.21874			643.862	-210.542			645.517	-136.188
									745.267	-4.74763			734.718	-203.608			749.232	-110.735													646.853	2.68392			644.388	-211.416			646.07	-136.909
									745.631	-4.13708			735.042	-205.069			749.591	-110.641													647.56	2.39661			644.777	-212.822			646.519	-137.519
									746.083	-3.35465			735.501	-206.463			750.307	-110.59													647.907	2.34814			645.249	-214.809			647.034	-138.008
									746.727	-2.5067			736.092	-207.687			750.654	-110.814													648.412	2.48214			645.68	-217.194			647.619	-138.432
									747.149	-1.73981			736.449	-208.706			751.275	-111.444													648.775	2.68339			645.978	-219.758			648.065	-138.88
									747.714	-1.21388			736.909	-209.561			751.514	-112.498													649.52	2.84301			646.644	-222.216			648.491	-139.358
									748.144	-1.07228			737.463	-210.3			752.019	-113.878													649.919	2.9204			646.978	-224.411			648.889	-139.875
									748.716	-1.39213			737.963	-211.086			752.589	-115.435													650.428	2.90469			647.514	-226.205			649.462	-140.373
									749.077	-2.15427			738.566	-212.017			753.051	-116.975													650.695	2.79403			647.753	-227.631			650.057	-140.821
									749.657	-3.24103			738.778	-213.227			753.464	-118.402													651.37	2.58301			648.61	-228.766			650.394	-141.204
									750.071	-4.47941			739.447	-214.745			753.913	-119.596													651.889	2.22506			648.991	-229.692			650.886	-141.562
									750.446	-5.60715			739.776	-216.534			754.344	-120.449													652.31	1.65206			649.288	-230.521			651.333	-141.902
									750.941	-6.4699			740.298	-218.562			754.888	-121.018													652.88	0.91722			649.909	-231.352			651.962	-142.327
									751.547	-7.01656			740.842	-220.749			755.433	-121.41													653.301	0.10271			650.251	-232.278			652.425	-142.879
									751.869	-7.24647			741.176	-223.014			755.904	-121.81													653.652	-0.59605			650.994	-233.429			652.843	-143.555
									752.534	-7.25432			741.654	-225.235			756.409	-122.35													654.101	-1.07769			651.254	-234.868			653.34	-144.322
									753.054	-7.12964			742.035	-227.316			756.785	-123.154													654.781	-1.22782			651.971	-236.598			653.679	-145.085
									753.341	-6.9708			742.733	-229.185			757.567	-124.155													655.237	-1.05362			652.098	-238.53			654.423	-145.738
									753.962	-6.82667			742.969	-230.753			757.634	-125.192													655.707	-0.59965			652.615	-240.541			654.697	-146.179
									754.309	-6.73605			743.481	-232.063			758.095	-126.087													656.262	0.03181			653.217	-242.53			655.142	-146.321
									755.051	-6.67421			744.034	-233.207			758.822	-126.714													656.567	0.83398			653.594	-244.37			655.9	-146.129
									755.529	-6.57729			744.496	-234.248			759.275	-127.042													657.14	1.70696			654.102	-246.027			656.118	-145.631
									755.772	-6.33951			745.08	-235.314			759.62	-127.194													657.69	2.4932			654.648	-247.57			656.667	-144.919
									756.245	-5.8382			745.332	-236.474			760.215	-127.281													658.395	2.99353			654.835	-249.043			657.291	-144.11
									756.843	-4.96752			745.99	-237.741			760.861	-127.412													658.653	3.05495			655.574	-250.63			657.762	-143.352
									757.46	-3.76485			746.408	-239.121			761.106	-127.629													659.106	2.58735			655.969	-252.393			658.261	-142.775
									757.939	-2.36106			746.651	-240.615			761.637	-127.935													659.717	1.65737			656.657	-254.452			658.755	-142.448
									758.338	-0.92848			747.6	-242.27			762.148	-128.327													660.173	0.46863			656.889	-256.726			659.161	-142.393
									758.868	0.29678			747.731	-244.072			762.591	-128.707													660.44	-0.76154			657.222	-259.082			659.627	-142.543
									759.448	1.16235			748.153	-246.061			763.131	-129.14													661.088	-1.80339			657.713	-261.371			660.285	-142.842
									759.996	1.55432			748.821	-248.23			763.749	-129.663													661.506	-2.487			658.334	-263.42			660.689	-143.213
									760.421	1.44169			749.227	-250.515			763.939	-130.262													662.039	-2.77827			658.705	-265.213			661.075	-143.557
									760.776	0.87956			749.58	-252.829			764.533	-130.922													662.433	-2.68744			659.335	-266.77			661.564	-143.862
									761.313	-0.03527			750.05	-255.016			765.061	-131.614													663.054	-2.29506			659.512	-268.162			662.095	-144.133
									761.92	-1.13172			750.579	-257			765.651	-132.277													663.469	-1.74946			660.251	-269.514			662.672	-144.409
									762.249	-2.21324			751.034	-258.708			765.927	-132.814													664.016	-1.2552			660.579	-270.887			663.092	-144.784
									762.748	-3.06625			751.353	-260.187			766.251	-133.203													664.554	-0.94239			661.078	-272.374			663.607	-145.321
									763.132	-3.59242			751.992	-261.584			767.107	-133.46													664.957	-0.86692			661.754	-274.018			663.995	-146.005
									763.603	-3.79008			752.581	-262.992			767.51	-133.647													665.533	-0.96188			661.904	-275.864			664.482	-146.79
									764.352	-3.75108			752.951	-264.566			767.872	-133.936													665.987	-1.12043			662.54	-277.968			665.084	-147.599
									764.755	-3.5984			753.369	-266.349			768.417	-134.49													666.301	-1.18721			662.891	-280.3			665.482	-148.259
									765.216	-3.43492			753.732	-268.309			768.967	-135.411													666.795	-1.08685			663.51	-282.862			665.885	-148.637
									765.659	-3.26653			754.352	-270.391			769.474	-136.734													667.572	-0.8363			663.915	-285.611			666.381	-148.628
									766.129	-3.03931			754.802	-272.531			769.825	-138.357													667.972	-0.54061			664.305	-288.455			666.977	-148.15
									766.571	-2.70293			755.286	-274.677			770.269	-140.147													668.34	-0.30313			664.71	-291.297			667.391	-147.261
									767.269	-2.20318			755.624	-276.765			770.711	-141.877													668.924	-0.16786			665.209	-293.988			667.857	-146.092
									767.649	-1.59861			756.117	-278.719			771.115	-143.403													669.328	-0.1691			665.659	-296.453			668.525	-144.859
									768.12	-0.97684			756.615	-280.564			771.863	-144.637													669.888	-0.25154			666.222	-298.673			669.057	-143.738
									768.63	-0.4178			757.056	-282.349			772.199	-145.476													670.413	-0.36928			666.434	-300.669			669.389	-142.894
									769.216	-0.00853			757.623	-284.173			772.593	-145.882													670.799	-0.42667			667.206	-302.584			669.988	-142.341
									769.605	0.22077			758.031	-285.698			772.965	-145.892													671.303	-0.39574			667.497	-304.529			670.433	-142.076
									770.106	0.21804			758.504	-286.725			773.665	-145.624													671.768	-0.31681			668.098	-306.615			670.812	-142.036
									770.669	-0.04526			759.04	-286.408			774.331	-145.266													672.327	-0.30825			668.432	-308.851			671.509	-142.205
									771.015	-0.56823			759.357	-283.215			774.556	-145.005													672.757	-0.42089			668.972	-311.184			671.905	-142.589
									771.635	-1.32312			759.709	-275.103			775.203	-145.016													673.51	-0.69896			669.368	-313.529			672.373	-143.15
									772.127	-2.18337			760.366	-259.919			775.651	-145.339													673.74	-1.08365			669.779	-315.732			672.819	-143.81
									772.421	-2.95854			760.761	-236.174			776.082	-145.894													674.143	-1.36427			670.273	-317.714			673.415	-144.436
									772.956	-3.46487			761.191	-203.984			776.472	-146.566													674.565	-1.33613			670.798	-319.436			673.675	-144.829
									773.434	-3.56346			761.738	-165.493			777.056	-147.254													675.267	-0.87924			671.259	-320.911			674.379	-144.786
									773.932	-3.26023			766.081	-124.746			777.577	-147.966													675.772	-0.04673			671.686	-322.266			674.598	-144.219
									774.466	-2.65735			766.518	-86.3671			777.985	-148.72													676.271	0.98465			672.159	-323.584			675.305	-143.074
									775.01	-1.9812			766.862	-54.2545			778.439	-149.609													676.598	1.95341			672.718	-324.964			675.847	-141.451
									775.581	-1.45924			767.5	-30.4388			779.114	-150.647													677.275	2.57248			673.264	-326.414			676.277	-139.603
									775.885	-1.20614			767.939	-14.7809			779.451	-151.771													677.855	2.69646			673.466	-327.931			676.775	-137.762
									776.514	-1.23836			768.231	-5.71215			779.79	-152.924													678.227	2.28121			674.134	-329.433			677.396	-136.202
									776.913	-1.49767			768.814	-1.05678			780.304	-153.936													678.646	1.48148			674.451	-330.854			677.927	-135.127
									777.367	-1.84034			769.128	1.14865			780.968	-154.727													679.144	0.55156			674.988	-332.202			678.353	-134.611
									777.91	-2.22092			769.993	2.26395			781.348	-155.277													679.609	-0.21643			675.577	-333.495			678.866	-134.604
									778.308	-2.60795			770.118	2.98374			781.63	-155.701													679.948	-0.60896			676.013	-334.793			679.146	-134.987
									778.923	-3.00845			770.877	3.42909			782.39	-156.163													680.625	-0.48979			676.361	-336.118			679.792	-135.55
									779.436	-3.46106			771.347	3.95106			782.874	-156.808													681.187	0.10361			676.886	-337.495			680.373	-136.145
									779.769	-3.93588			771.6	4.42617			783.375	-157.747													681.48	1.03494			677.447	-338.898			680.644	-136.637
									780.237	-4.36743			772.414	4.77651			783.807	-158.956													682.083	2.03515			677.807	-340.308			681.174	-136.912
									780.889	-4.67264			772.73	5.01743			784.006	-160.297													682.675	2.91298			678.274	-341.727			681.704	-136.913
									781.136	-4.82316			773.275	5.14775			784.661	-161.633													683.068	3.52304			678.866	-343.222			682.151	-136.655
									781.832	-4.82693			773.646	5.15141			785.145	-162.903													683.679	3.76682			679.213	-344.83			682.744	-136.232
									782.253	-4.76027			774.313	5.04014			785.759	-164.088													684.11	3.68432			679.778	-346.631			683.127	-135.813
									782.734	-4.65326			774.662	4.76726			786.106	-165.177													684.442	3.3837			680.169	-348.638			683.68	-135.584
									783.34	-4.54753			775.143	4.38169			786.467	-166.215													684.97	3.00753			680.756	-350.816			684.228	-135.692
									783.655	-4.41197			775.859	3.8771			787.106	-167.209													685.544	2.60147			681.038	-353.071			684.825	-136.215
									784.16	-4.19176			776.137	3.43314			787.497	-168.137													686.147	2.24162			681.542	-355.271			685.043	-137.077
									784.702	-3.81601			776.457	3.19162			788.017	-168.997													686.382	1.96601			682.033	-357.33			685.482	-138.106
									785.184	-3.2886			777.099	3.29075			788.494	-169.834													686.908	1.78393			682.441	-359.162			686.071	-139.146
									785.777	-2.65693			777.607	3.82981			789.013	-170.728													687.525	1.70592			682.975	-360.776			686.615	-140.068
									786.176	-1.93638			778.11	4.70929			789.358	-171.801													687.9	1.74534			683.483	-362.187			687.044	-140.781
									786.54	-1.24446			778.644	5.84186			789.912	-173.136													688.442	1.85886			683.888	-363.416			687.4	-141.263
									787.343	-0.61591			779.153	7.11665			790.587	-174.729													688.922	2.04628			684.395	-364.544			688.016	-141.537
									787.649	-0.14468			779.659	8.42618			790.832	-176.474													689.518	2.26529			684.797	-365.613			688.481	-141.663
									788.208	0.08793			779.984	9.66356			791.295	-178.16													689.817	2.49141			685.268	-366.764			688.994	-141.686
									788.59	0.04224			780.747	10.702			791.606	-179.6													690.352	2.6975			686.002	-368.112			689.443	-141.687
									789.201	-0.33327			781.039	11.4298			792.195	-180.633													690.881	2.83157			686.279	-369.805			689.969	-141.678
									789.694	-1.02853			781.762	11.6909			792.779	-181.264													691.498	2.81641			686.792	-371.873			690.482	-141.674
									790.046	-1.99419			782.353	11.4646			793.265	-181.586													691.877	2.55974			687.134	-374.247			690.841	-141.65
									790.618	-3.14306			782.419	10.8254			793.816	-181.73													692.33	2.09338			687.697	-376.783			691.381	-141.588
									790.965	-4.31662			782.889	9.95659			794.095	-181.744													692.782	1.52133			688.157	-379.289			691.989	-141.473
									791.565	-5.3763			783.694	9.05477			794.69	-181.655													693.394	0.951			688.416	-381.629			692.361	-141.295
									791.994	-6.15964			784.013	8.257			795.077	-181.49													693.717	0.5567			689.04	-383.764			692.824	-141.078
									792.421	-6.50515			784.459	7.69074			795.747	-181.291													694.206	0.41606			689.491	-385.722			693.487	-140.803
									792.913	-6.31606			784.957	7.44947			796.169	-181.216													694.742	0.5075			690.052	-387.66			693.802	-140.432
									793.415	-5.59248			785.5	7.50626			796.679	-181.386													695.355	0.70039			690.422	-389.682			694.276	-139.99
									793.981	-4.44177			785.781	7.83842			797.192	-181.987													695.753	0.83367			690.91	-391.875			694.849	-139.531
									794.472	-3.02663			786.549	8.21893			797.658	-183.032													696.17	0.77799			691.331	-394.348			695.456	-139.104
									794.962	-1.58356			786.933	8.42252			798.005	-184.471													696.842	0.5046			691.804	-397.105			695.837	-138.77
									795.575	-0.35875			787.556	8.2248			798.561	-186.2													697.299	0.05762			692.324	-400.176			696.279	-138.563
									795.942	0.45703			788.119	7.48846			799.099	-188.014													697.504	-0.45114			692.74	-403.484			696.872	-138.403
									796.579	0.77595			788.281	6.25886			799.414	-189.759													698.128	-0.90067			693.129	-406.927			697.293	-138.166
									796.915	0.67348			788.761	4.79454			799.854	-191.266													698.751	-1.17759			693.688	-410.37			697.657	-137.767
									797.576	0.34789			789.391	3.37743			800.298	-192.441													699.133	-1.24534			693.776	-413.683			698.385	-137.165
									797.859	0.11388			789.716	2.29876			801.096	-193.276													699.635	-1.07447			694.553	-416.799			698.771	-136.362
									798.242	0.22502			790.319	1.76921			801.204	-193.85													700.059	-0.70975			695.05	-419.697			699.184	-135.46
									798.819	0.77534			790.64	1.8717			801.883	-194.29													700.582	-0.15543			695.312	-422.507			699.888	-134.598
									799.384	1.67008			791.226	2.50099			802.431	-194.69													701.135	0.50795			695.926	-425.323			700.357	-133.913
									800.057	2.61165			791.706	3.471			802.763	-195.108													701.685	1.23221			696.252	-428.182			700.673	-133.497
									800.444	3.29296			792.37	4.41473			803.373	-195.592													702.12	1.99892			696.847	-431.067			701.298	-133.408
									800.972	3.50677			792.841	5.00855			803.763	-196.124													702.566	2.84042			697.206	-433.37			701.847	-133.621
									801.392	3.23614			793.349	5.03004			804.146	-196.719													703.018	3.71748			697.688	-434.501			702.25	-133.996
									801.735	2.62944			793.763	4.39085			804.867	-197.371													703.563	4.5968			697.953	-433.41			702.664	-134.377
									802.393	1.8803			794.219	3.26936			805.285	-198.025													704.242	5.38893			698.452	-428.336			703.098	-134.635
									802.827	1.21458			794.7	1.9741			805.76	-198.619													704.54	5.8986			699.322	-417.019			703.657	-134.711
									803.208	0.71798			795.066	0.88011			806.054	-198.948													705.152	5.98048			699.561	-396.743			704.193	-134.722
									803.809	0.43485			795.501	0.28669			806.56	-199.002													705.544	5.56435			699.942	-365.33			704.7	-134.869
									804.233	0.36058			796.133	0.28866			807.18	-198.792													706.14	4.74286			700.552	-322.232			705.236	-135.329
									804.84	0.53747			796.522	0.82627			807.653	-198.5													706.481	3.66371			700.87	-269.361			705.686	-136.168
									805.165	0.98031			797.154	1.68603			808.347	-198.424													707.005	2.55621			705.277	-211.286			706.077	-137.315
									805.772	1.74574			797.722	2.62395			808.631	-198.77													707.37	1.62789			707.167	-154.068			706.554	-138.569
									806.164	2.84742			798.095	3.42012			809.142	-199.658													707.876	1.01697			707.762	-103.515			706.935	-139.697
									806.692	4.26989			798.708	3.97198			809.675	-201.058													708.553	0.79324			708.509	-63.4487			707.505	-140.571
									807.342	5.87569			798.931	4.23963			809.902	-202.803													708.953	0.95305			708.701	-35.0184			708.023	-141.225
									807.746	7.48698			799.662	4.25794			810.647	-204.743													709.332	1.47097			709.406	-17.0214			708.481	-141.733
									808.306	8.86729			800.171	4.11691			810.879	-206.718													709.768	2.19628			709.856	-6.82446			709.057	-142.207
									808.681	9.78266			800.546	3.89442			811.461	-208.699													710.552	2.97315			710.195	-1.69123			709.439	-142.676
									809.504	10.1481			800.975	3.70215			811.952	-210.646													710.957	3.57769			710.759	0.66095			709.91	-143.119
									809.729	9.96085			801.514	3.68259			812.329	-212.567													711.425	3.82107			711.214	1.78032			710.41	-143.421
									810.286	9.41725			802.013	3.9214			812.891	-214.458													711.937	3.59064			711.705	2.29411			710.792	-143.543
									810.552	8.73591			802.467	4.45738			813.278	-216.255													712.369	2.99566			712.234	2.74976			711.405	-143.51
									811.136	8.14835			803.048	5.21892			813.764	-217.871													712.87	2.20961			712.827	3.24038			712.027	-143.37
									811.678	7.75515			803.471	6.07227			814.241	-219.233													713.304	1.52494			713.294	3.69776			712.278	-143.199
									812.19	7.53137			803.976	6.86895			814.602	-220.285													713.767	1.23753			713.551	4.10162			712.923	-143.002
									812.68	7.40034			804.65	7.36003			815.261	-221.052													714.167	1.46106			714.342	4.39232			713.321	-142.767
									813.067	7.24362			805.048	7.47871			815.605	-221.53													714.74	2.08426			714.638	4.59706			713.836	-142.487
									813.689	6.98696			805.463	7.20805			816.277	-221.824													715.418	2.85422			715.166	4.6888			714.189	-142.21
									814.054	6.59726			805.929	6.60444			816.639	-221.946													715.861	3.46944			715.798	4.64948			714.966	-142.067
									814.603	6.15117			806.478	5.82139			817.093	-221.964													716.254	3.69291			716.214	4.52235			715.422	-142.154
									815.07	5.67066			806.981	5.04327			817.474	-221.985													716.948	3.43258			716.567	4.36897			715.794	-142.496
									815.521	5.19216			807.22	4.42529			818.261	-222.113													717.18	2.83359			717.064	4.31979			716.274	-143.048
									816.017	4.72334			807.854	4.04038			818.722	-222.516													717.601	2.11171			717.685	4.45412			716.689	-143.656
									816.476	4.23668			808.537	3.92039			819.058	-223.268													718.22	1.48887			718.125	4.81524			717.213	-144.187
									817.029	3.73462			808.661	4.01768			819.537	-224.412													718.767	1.10813			718.505	5.33386			717.688	-144.601
									817.579	3.21799			809.37	4.21485			820.097	-225.88													719.071	0.96045			719.165	5.87292			718.284	-144.934
									817.894	2.76046			809.963	4.45534			820.359	-227.547													719.697	0.93695			719.634	6.32548			718.75	-145.249
									818.358	2.4486			810.292	4.6698			821.055	-229.321													720.146	0.93114			720.163	6.5415			719.099	-145.63
									818.908	2.39052			810.782	4.83474			821.461	-231.054													720.769	0.85766			720.66	6.51506			719.656	-146.142
									819.471	2.6027			811.316	4.94032			821.811	-232.581													721.061	0.65643			720.942	6.31443			720.203	-146.8
									819.81	3.04687			811.837	5.01034			822.384	-233.45													721.633	0.34764			721.582	6.03623			720.588	-147.616
									820.474	3.58767			812.222	5.0227			822.705	-233.35													722.085	0.02301			722.017	5.76242			721.152	-148.606
									820.859	4.09363			812.769	4.91807			823.4	-231.609													722.529	-0.25021			722.572	5.52992			721.526	-149.747
									821.497	4.45778			813.392	4.63288			823.682	-227.229													723.18	-0.39226			722.902	5.33222			722.138	-151.002
									821.887	4.68611			813.67	4.18821			824.38	-218.912													723.546	-0.28387			723.55	5.12972			722.397	-152.326
									822.352	4.81932			814.238	3.54008			824.899	-205.223													723.907	0.14016			724.114	4.87597			723.053	-153.677
									822.818	4.95812			814.722	2.79597			825.24	-185.168													724.546	0.79445			724.336	4.56331			723.434	-155.016
									823.302	5.13894			815.196	2.03605			825.632	-158.877													725.098	1.59213			724.943	4.1875			723.982	-156.282
									823.835	5.35753			815.55	1.34087			826.494	-127.962													725.5	2.31728			725.455	3.78491			724.388	-157.464
									824.434	5.5504			816.179	0.80381			829.579	-95.4069													726.139	2.79267			725.923	3.34652			724.893	-158.428
									824.808	5.64747			816.599	0.45574			830.266	-64.7293													726.596	2.8965			726.413	2.83772			725.337	-159.06
									825.32	5.55681			817.174	0.38583			830.684	-38.8486													727.019	2.62341			726.882	2.27577			725.794	-159.256
									825.681	5.26532			817.481	0.58589			831.185	-19.2832													727.368	2.07913			727.31	1.60881			726.337	-159
									826.41	4.74976			818.122	1.07555			831.541	-5.94294													728	1.3879			727.841	0.86039			726.763	-158.399
									826.783	4.08803			818.462	1.84471			832.169	2.26199													728.576	0.70992			728.409	0.0223			727.338	-157.682
									827.236	3.41445			819.211	2.73041			832.586	6.87026													728.81	0.10516			728.788	-0.83026			727.862	-157.154
									827.643	2.86249			819.568	3.60321			833.125	9.20042													729.431	-0.36567			729.159	-1.56962			728.555	-157.048
									828.149	2.56956			820.063	4.31348			833.628	10.0861													729.908	-0.65462			729.837	-2.07809			728.734	-157.485
									828.634	2.55111			820.737	4.74378			834.196	9.98963													730.343	-0.73825			730.166	-2.20877			729.336	-158.385
									829.179	2.71712			820.958	4.87109			834.698	9.09665													730.95	-0.65286			730.595	-1.91678			729.677	-159.57
									829.729	2.99016			821.703	4.74919			834.957	7.82813													731.298	-0.42766			731.3	-1.25286			730.256	-160.813
									830.265	3.23177			821.908	4.43586			835.468	6.42067													731.848	-0.0962			731.641	-0.36593			730.607	-161.985
									830.614	3.43064			822.451	3.97223			836.062	5.14169													732.375	0.31627			732.318	0.56842			731.256	-163.021
									831.011	3.65029			823.179	3.34185			836.301	4.22369													732.973	0.84574			732.791	1.4429			731.605	-163.956
									831.692	4.04515			823.42	2.57535			836.856	3.7355													733.224	1.56055			733.238	2.19588			732.213	-164.803
									832.077	4.75333			823.996	1.65468			837.51	3.63831													733.769	2.51933			733.658	2.92363			732.627	-165.577
									832.688	5.84507			824.53	0.78003			837.89	3.77313													734.31	3.7216			734.124	3.70687			733.039	-166.247
									833.07	7.31687			824.771	0.10142			838.465	3.95285													734.903	5.1241			734.731	4.50926			733.538	-166.73
									833.413	9.06155			825.33	-0.16924			838.917	4.08242													735.406	6.59642			735.206	5.27465			734.023	-167.056
									834.309	10.8294			825.824	0.10175			839.437	4.11265													735.82	8.00206			735.778	5.80046			734.63	-167.276
									834.759	12.3621			826.4	0.77966			839.823	4.15848													736.349	9.19318			736.251	5.93421			734.989	-167.5
									835.184	13.4347			826.837	1.69837			840.312	4.3328													736.766	10.0199			736.692	5.67373			735.604	-167.816
									835.691	13.9507			827.415	2.53377			840.867	4.6874													737.481	10.326			737.336	5.07034			735.915	-168.279
									836.096	13.9372			828.119	3.068			841.31	5.25743													737.969	10.0535			737.41	4.32314			736.621	-168.867
									836.679	13.5116			828.245	3.20027			841.814	5.87641													738.24	9.29214			738.037	3.61431			736.924	-169.499
									837.027	12.8727			829	2.95719			842.425	6.40624													738.806	8.24979			738.728	3.10673			737.331	-170.105
									837.559	12.1465			829.155	2.51858			842.847	6.68858													739.274	7.23491			739.018	2.83003			737.933	-170.663
									838.16	11.4393			829.781	2.05358			843.547	6.65872													739.582	6.51291			739.648	2.75342			738.476	-171.179
									838.461	10.8243			830.479	1.69701			843.614	6.40805													740.174	6.16431			739.945	2.82146			738.897	-171.668
									838.996	10.3488			830.675	1.53091			844.212	5.97399													740.645	6.06094			740.478	2.94928			739.4	-172.132
									839.511	10.0934			831.251	1.58934			844.899	5.43978													741.394	5.91807			741.2	3.0707			739.828	-172.444
									839.993	10.0887			831.682	1.87679			845.161	4.85416													741.745	5.45215			741.573	3.12149			740.355	-172.514
									840.455	10.318			832.401	2.31037			845.891	4.26593													742.205	4.55723			741.979	3.09422			740.657	-172.203
									840.898	10.7205			832.693	2.79578			846.144	3.75484													742.598	3.34596			742.34	3.0027			741.396	-171.528
									841.508	11.1693			833.167	3.24882			846.79	3.45268													743.09	2.04136			743.114	2.82325			741.852	-170.564
									842.057	11.5431			833.885	3.50049			846.958	3.4181													743.508	0.88892			743.528	2.57844			742.264	-169.502
									842.435	11.7308			834.222	3.53491			847.463	3.64742													744.053	0.04051			743.939	2.28628			742.882	-168.598
									842.904	11.6742			834.786	3.30855			848.511	3.95264													744.516	-0.50308			744.399	1.96144			743.435	-168.037
									843.501	11.3973			835.148	2.95658			848.727	4.19634													745.079	-0.8525			744.924	1.67127			743.753	-167.934
									843.886	10.9645			835.64	2.67508			849.093	4.1963													745.623	-1.09156			745.452	1.45745			744.409	-168.314
									844.372	10.4794			836.217	2.6178			849.637	3.9776													745.889	-1.28837			745.815	1.43924			744.729	-169.079
									844.865	10.0381			836.543	2.87996			850.145	3.68428													746.509	-1.41531			746.473	1.68064			745.299	-170.063
									845.353	9.72926			837.059	3.41927			850.478	3.45603													747.016	-1.47078			746.791	2.2033			745.712	-171.03
									845.828	9.62401			837.714	4.10033			851.14	3.46193													747.35	-1.4305			747.299	3.01322			746.11	-171.826
									846.276	9.75974			838.201	4.68073			851.528	3.67909													748.022	-1.31254			747.937	3.95898			746.716	-172.32
									846.87	10.1456			838.826	5.0139			852.148	4.12322													748.539	-1.0935			748.367	4.92583			747.108	-172.498
									847.312	10.7804			839.042	5.15938			852.472	4.66145													748.907	-0.7659			748.973	5.67296			747.669	-172.46
									847.709	11.5724			839.589	5.1691			853.163	5.21286													749.341	-0.26558			749.414	6.06222			748.205	-172.328
									848.347	12.4269			840.019	5.2314			853.547	5.79094													749.887	0.39859			749.732	5.97622			748.672	-172.206
									848.907	13.2712			840.592	5.38728			854.075	6.33829													750.458	1.1668			750.593	5.4525			749.134	-172.195
									849.315	14.0262			841.035	5.57818			854.48	6.81915													750.975	1.93135			750.83	4.66408			749.556	-172.311
									849.75	14.6408			841.679	5.69211			854.999	7.15009													751.419	2.52994			751.113	3.80615			750.153	-172.542
									850.263	15.0802			842.22	5.54356			855.699	7.27233													751.949	2.83693			751.841	3.14245			750.625	-172.832
									850.825	15.275			842.467	5.07547			855.954	7.12898													752.365	2.78942			752.111	2.82493			751.037	-173.106
									851.272	15.1836			842.882	4.35851			856.664	6.75369													752.93	2.35212			752.839	2.84879			751.578	-173.241
									851.911	14.8081			843.745	3.52282			856.893	6.25607													753.322	1.55378			753.078	3.12243			752.023	-173.098
									852.23	14.2672			843.831	2.76662			857.365	5.76194													753.925	0.45872			753.909	3.41548			752.45	-172.612
									852.623	13.7154			844.481	2.24823			857.932	5.35467													754.342	-0.78993			754.23	3.56114			753.013	-171.754
									853.122	13.3073			844.856	2.10111			858.438	5.06516													754.735	-1.99154			754.7	3.43883			753.566	-170.664
									853.665	13.0891			845.343	2.32971			859.058	4.82788													755.192	-2.88548			755.308	3.06185			753.991	-169.547
									854.181	13.0399			846.067	2.89977			859.318	4.58152													755.766	-3.28306			755.593	2.57899			754.643	-168.644
									854.787	13.0386			846.366	3.61783			859.851	4.24985													756.124	-3.11745			756.062	2.10849			755.118	-168.128
									855.148	12.9474			846.895	4.33323			860.45	3.85714													756.645	-2.49921			756.697	1.73076			755.487	-168.07
									855.6	12.7267			847.509	4.91555			860.809	3.49552													757.338	-1.61676			757.059	1.52016			756.045	-168.406
									856.074	12.3758			847.993	5.24942			861.436	3.2347													757.852	-0.64756			757.697	1.41435			756.484	-169.024
									856.647	11.9724			848.361	5.35915			861.692	3.22906													758.203	0.30649			758.065	1.44079			756.864	-169.735
									857.076	11.5305			848.869	5.35597			862.256	3.49138													758.688	1.25651			758.639	1.51609			757.569	-170.384
									857.656	11.0754			849.396	5.28557			862.781	3.98254													759.096	2.26248			758.938	1.67486			757.883	-170.824
									857.888	10.5542			849.747	5.22614			863.347	4.57292													759.73	3.26805			759.613	1.86277			758.366	-170.958
									858.55	9.9334			850.508	5.12897			863.941	5.08114													760.262	4.11275			760.125	2.02324			758.803	-170.746
									859.176	9.2294			850.754	4.93749			864.218	5.40152													760.829	4.59697			760.544	2.15557			759.449	-170.261
									859.478	8.50159			851.357	4.61171			864.823	5.4347													761.252	4.55069			761.016	2.15463			759.872	-169.594
									859.961	7.86012			851.937	4.09823			865.298	5.20991													761.666	3.9901			761.571	2.00604			760.471	-168.863
									860.225	7.46015			852.148	3.42627			865.672	4.78497													762.255	3.07131			761.905	1.70728			760.858	-168.207
									861.088	7.36888			852.808	2.63875			866.312	4.20934													762.51	2.05919			762.636	1.25446			761.412	-167.658
									861.316	7.60647			853.22	1.83758			866.691	3.56305													763.041	1.20235			762.938	0.74992			761.809	-167.222
									862.043	8.12638			853.704	1.05763			867.205	2.88948													763.645	0.6191			763.5	0.26102			762.388	-166.898
									862.397	8.84667			854.302	0.35237			867.67	2.26661													764.069	0.32649			763.872	-0.00833			762.881	-166.65
									862.815	9.67957			854.58	-0.14055			868.086	1.76408													764.552	0.26595			764.257	0.0567			763.385	-166.489
									863.45	10.5311			855.142	-0.38045			868.689	1.46683													765.18	0.38402			765.095	0.56634			763.767	-166.404
									864.025	11.3684			855.643	-0.27364			869.047	1.45696													765.401	0.66571			765.271	1.53352			764.308	-166.371
									864.301	12.1858			856.085	0.13573			869.652	1.75427													766.061	1.10071			765.914	2.79957			764.915	-166.357
									865.007	12.9291			856.673	0.72252			870.075	2.41006													766.568	1.66989			766.424	4.1803			765.234	-166.381
									865.324	13.5805			857.025	1.36195			870.574	3.40888													766.996	2.32149			766.931	5.39117			765.729	-166.444
									865.86	13.9954			857.863	1.82253			871.063	4.65079													767.558	3.05361			767.657	6.20924			766.275	-166.634
									866.4	14.1091			858.213	2.04663			871.63	5.99727													768.066	3.83196			767.825	6.50067			766.837	-167
									867.076	13.8123			858.391	2.01802			872.183	7.19865													768.484	4.61049			768.511	6.24685			767.298	-167.589
									867.376	13.1984			859.219	1.84491			872.647	8.1032													768.992	5.3432			768.886	5.60398			767.716	-168.336
									867.777	12.462			859.548	1.67628			873.208	8.61245													769.442	5.94397			769.313	4.80358			768.106	-169.089
									868.212	11.86			860.044	1.5873			873.67	8.71228													770.123	6.29472			769.928	4.05305			768.69	-169.662
									868.728	11.623			860.579	1.6096			873.989	8.50531													770.601	6.36684			770.108	3.55596			769.147	-169.916
									869.167	11.7954			860.901	1.66966			874.534	8.09352													771.014	6.16734			770.884	3.25959			769.525	-169.815
									869.893	12.1963			861.713	1.669			875.07	7.61706													771.317	5.81317			771.166	3.11019			770.156	-169.464
									870.33	12.5644			861.999	1.50487			875.614	7.12932													771.852	5.3923			771.997	2.90427			770.645	-169.034
									870.826	12.6791			862.6	1.07527			876.136	6.70858													772.558	4.95503			772.337	2.5413			771.256	-168.678
									871.243	12.4549			862.901	0.41845			876.252	6.38794													772.959	4.49634			772.706	2.07211			771.658	-168.448
									871.732	11.9595			863.452	-0.41359			876.965	6.18231													773.364	4.01224			773.149	1.58562			772.043	-168.243
									872.202	11.4027			863.975	-1.37291			877.609	6.15477													773.924	3.50209			773.691	1.32987			772.534	-167.902
									872.592	10.9133			864.445	-2.30755			878.016	6.24672													774.316	3.05375			774.151	1.41879			772.995	-167.326
									873.16	10.5907			864.923	-3.12279			878.392	6.43359													774.767	2.73705			774.76	1.91122			773.581	-166.548
									873.676	10.412			865.223	-3.65886			878.811	6.62915													775.362	2.57963			774.991	2.74197			774.21	-165.71
									874.262	10.2668			865.87	-3.82793			879.531	6.71604													775.89	2.57056			775.9	3.69491			774.535	-165.007
									874.521	10.1044			866.359	-3.64179			879.946	6.59387													776.243	2.59713			776.132	4.63411			775.155	-164.587
									875.17	9.86395			866.755	-3.15459			880.582	6.19555													776.807	2.53083			776.727	5.33804			775.646	-164.464
									875.635	9.56991			867.336	-2.60468			880.915	5.58041													777.309	2.26256			777.27	5.74281			775.99	-164.514
									876.034	9.27424			867.928	-2.19181			881.083	4.85316													777.865	1.7323			777.579	5.79546			776.451	-164.552
									876.62	9.04499			868.415	-2.06001			881.998	4.1278													778.198	0.97979			778.3	5.4835			777.03	-164.426
									876.942	8.90339			868.882	-2.28168			882.285	3.56053													778.732	0.08894			778.546	4.89729			777.521	-164.113
									877.598	8.89126			869.131	-2.73994			882.852	3.23663													779.268	-0.78032			779.213	4.16288			777.993	-163.687
									878.147	9.01054			869.834	-3.27392			883.243	3.20046													779.548	-1.45663			779.633	3.4758			778.491	-163.343
									878.329	9.30222			870.21	-3.68631			883.751	3.44086													780.204	-1.80383			779.917	3.03471			779.039	-163.247
									879.191	9.81636			870.709	-3.84309			884.279	3.91718													780.591	-1.78748			780.57	2.88457			779.624	-163.505
									879.388	10.6008			871.314	-3.62245			884.698	4.61319													781.157	-1.47784			780.936	3.04616			779.923	-164.138
									879.956	11.5612			871.606	-2.98885			885.448	5.45771													781.706	-1.06972			781.591	3.35843			780.424	-165.045
									880.484	12.5351			872.072	-1.99529			885.726	6.38264													782.02	-0.75615			782.224	3.66421			780.853	-166.026
									881.168	13.3172			872.942	-0.72721			886.178	7.29733													782.75	-0.72176			782.505	3.82595			781.408	-166.964
									881.511	13.637			873.14	0.7027			886.814	8.06996													783.242	-1.01136			783.05	3.78983			781.844	-167.769
									882.09	13.4048			873.787	2.14924			887.292	8.64166													783.536	-1.59809			783.343	3.68			782.387	-168.416
									882.5	12.626			874.25	3.52682			887.894	8.91883													783.971	-2.3114			784.014	3.54479			782.745	-168.946
									882.889	11.5434			874.747	4.71182			888.262	8.84303													784.579	-2.92458			784.605	3.47924			783.373	-169.394
									883.371	10.4411			875.233	5.71902			888.628	8.41728													785.037	-3.29395			784.928	3.51721			783.824	-169.807
									883.93	9.57303			875.807	6.50502			889.197	7.67541													785.51	-3.29693			785.353	3.64382			784.316	-170.163
									884.334	9.1569			876.301	7.09817			889.831	6.73319													785.948	-2.94205			785.929	3.87062			784.598	-170.457
									884.664	9.18029			876.677	7.5235			890.221	5.75166													786.518	-2.29031			786.59	4.12349			785.355	-170.717
									885.496	9.5368			877.171	7.77952			890.556	4.98038													786.989	-1.44272			786.876	4.32583			785.734	-170.951
									885.86	10.0335			877.788	7.88543			891.005	4.62663													787.598	-0.54086			787.249	4.36518			786.223	-171.211
									886.438	10.5268			878.202	7.84484			891.474	4.84405													787.981	0.3274			788.073	4.0731			786.731	-171.532
									886.76	10.871			878.788	7.62922			892.189	5.62926													788.45	1.03358			788.5	3.45524			787.158	-171.935
									887.403	11.0716			879.03	7.20994			892.584	6.85302													789.024	1.50546			788.922	2.56639			787.722	-172.411
									887.707	11.1356			879.741	6.59125			893.207	8.32155													789.53	1.68808			789.265	1.6772			788.066	-172.947
									888.347	11.0686			880.093	5.80753			893.592	9.82113													790.028	1.60378			789.665	1.0812			788.74	-173.502
									888.855	10.9103			880.731	4.88713			894.111	11.1816													790.467	1.33178			790.226	0.97774			789.113	-174.013
									889.295	10.6937			881.059	3.91898			894.691	12.3033													790.896	1.02004			790.728	1.3851			789.511	-174.417
									889.731	10.5067			881.398	2.97571			895.141	13.0853													791.329	0.80738			791.376	2.17234			790.102	-174.647
									890.19	10.3964			882.144	2.15435			895.61	13.4945													791.933	0.827			791.932	3.1191			790.605	-174.577
									890.774	10.4667			882.452	1.52437			896.251	13.4649													792.519	1.12686			792.165	3.9887			791.028	-174.13
									891.113	10.6813			883.132	1.16311			896.56	13.0443													792.748	1.69736			792.895	4.646			791.516	-173.287
									891.787	10.995			883.351	1.10831			897.085	12.3138													793.389	2.49884			793.211	5.08672			791.987	-172.071
									892.286	11.2646			883.864	1.39003			897.561	11.4058													793.932	3.40658			793.824	5.3091			792.59	-170.677
									892.648	11.4168			884.549	1.91832			897.989	10.4334													794.402	4.27536			794.26	5.31318			793.064	-169.318
									893.251	11.3847			884.978	2.66703			898.47	9.52805													794.879	4.96611			794.761	5.06342			793.723	-168.291
									893.6	11.1538			885.549	3.44987			899.088	8.72871													795.431	5.37083			795.201	4.58021			794.095	-167.734
									894.211	10.7424			885.866	4.2133			899.315	8.10192													795.886	5.41797			795.822	3.92159			794.58	-167.69
									894.637	10.172			886.499	4.82953			900.062	7.63941													796.4	5.1281			796.246	3.21618			795.032	-168.063
									895.172	9.52518			886.982	5.20712			900.306	7.31987													796.859	4.58586			796.537	2.68099			795.539	-168.693
									895.557	8.91732			887.45	5.28032			900.909	7.07123													797.158	3.8596			797.037	2.44858			795.877	-169.386
									896.106	8.51066			887.97	4.92191			901.502	6.82646													797.89	3.08967			797.604	2.54045			796.575	-170.079
									896.467	8.35553			888.486	4.15231			901.883	6.52823													798.339	2.28277			798.192	2.8793			796.898	-170.781
									896.947	8.45059			888.794	2.97656			902.346	6.19233													798.684	1.47649			798.727	3.22845			797.516	-171.568
									897.633	8.70775			889.605	1.56457			902.921	5.91608													799.217	0.73935			799.051	3.43736			797.874	-172.52
									898.12	8.97415			889.602	0.18369			903.19	5.75957													799.792	0.19346			799.716	3.35023			798.439	-173.675
									898.631	9.18412			890.293	-0.93525			903.893	5.86051													800.152	-0.07156			800.098	2.98497			798.919	-174.939
									898.935	9.32241			890.625	-1.63464			904.234	6.2722													800.602	0.04342			800.467	2.39336			799.393	-176.161
									899.408	9.49018			891.298	-1.88347			904.83	6.93598													801.224	0.50597			801.166	1.66921			799.621	-177.092
									899.934	9.71531			891.844	-1.7459			905.361	7.81885													801.491	1.14617			801.423	0.90138			800.304	-177.537
									900.611	9.98364			892.146	-1.28762			905.746	8.71294													802.346	1.81348			802.039	0.10058			800.737	-177.389
									901.028	10.1674			892.853	-0.62262			906.311	9.49861													802.855	2.27696			802.559	-0.70137			801.227	-176.737
									901.412	10.1814			893.114	0.1826			906.854	10.0649													803.105	2.4915			802.848	-1.50043			801.815	-175.735
									902.001	9.98952			893.644	1.03385			907.546	10.3581													803.49	2.46683			803.583	-2.21398			802.309	-174.673
									902.495	9.65204			894.313	1.76229			907.555	10.4177													804.181	2.19827			803.777	-2.77691			802.837	-173.707
									902.915	9.30846			894.896	2.32549			908.313	10.3184													804.583	1.68879			804.42	-3.17586			803.342	-172.97
									903.268	9.10682			895.219	2.60674			908.734	10.1285													805.225	0.89025			804.907	-3.35053			803.717	-172.385
									903.892	9.11774			895.726	2.70406			909.192	9.8704													805.718	-0.23582			805.302	-3.33368			804.262	-171.852
									904.37	9.24329			896.006	2.69997			909.956	9.49218													805.854	-1.60307			805.953	-3.13679			804.71	-171.255
									904.967	9.35922			896.776	2.71609			910.083	8.98371													806.61	-3.03245			806.361	-2.71183			805.241	-170.614
									905.356	9.23077			897.145	2.84093			910.699	8.32468													806.92	-4.29428			806.893	-2.08833			805.725	-169.968
									905.864	8.78677			897.726	3.05232			911.182	7.52015													807.415	-5.23899			807.123	-1.26876			806.378	-169.447
									906.404	8.02263			898.191	3.36329			911.648	6.63538													807.96	-5.81333			807.896	-0.36575			806.701	-169.109
									906.85	7.04301			898.505	3.72579			912.194	5.72531													808.373	-6.10101			808.487	0.42963			807.348	-168.965
									907.123	6.04991			899.214	4.07676			912.472	4.93478													809.025	-6.21543			808.855	0.97927			807.558	-168.912
									907.71	5.1905			899.574	4.36633			913.187	4.31586													809.477	-6.20412			809.486	1.13094			808.212	-168.8
									908.298	4.5629			900.227	4.47421			913.522	4.03952													809.845	-6.07007			809.74	0.94791			808.687	-168.516
									908.637	4.17151			900.645	4.28082			913.897	4.15871													810.384	-5.74756			810.252	0.57781			809.22	-168.003
									909.401	4.00311			901.047	3.71622			914.589	4.61846													810.662	-5.21058			810.859	0.19456			809.629	-167.234
									909.502	3.98357			901.661	2.83885			915.048	5.35604													811.594	-4.62045			811.207	0.02721			810.185	-166.252
									910.155	4.0572			902.069	1.80962			915.521	6.10032													811.88	-4.10122			811.79	0.16701			810.606	-165.169
									910.71	4.14158			902.494	0.86718			916.146	6.65431													812.373	-3.88029			812.151	0.69605			811.31	-164.128
									911.195	4.1483			902.938	0.28205			916.541	6.83918													812.898	-4.05999			812.735	1.53389			811.623	-163.294
									911.765	4.09625			903.277	0.1933			917.095	6.54363													813.424	-4.61324			813.356	2.55739			812.172	-162.87
									912.063	4.01298			904.027	0.56969			917.405	5.82297													813.781	-5.38771			813.675	3.61303			812.816	-162.931
									912.528	4.00195			904.5	1.24514			918.081	4.77228													814.231	-6.08733			814.316	4.50322			813.189	-163.521
									913.081	4.19187			905.094	1.93724			918.495	3.6145													814.747	-6.47316			814.857	5.13175			813.562	-164.502
									913.667	4.67448			905.361	2.50037			918.729	2.53886													815.301	-6.3697			815.2	5.42386			814.071	-165.653
									914.081	5.48189			906.165	2.80271			919.451	1.69408													815.63	-5.71157			815.842	5.42093			814.61	-166.736
									914.552	6.64891			906.364	2.85612			919.765	1.14865													816.283	-4.58916			816.074	5.21229			814.938	-167.593
									915.119	8.0574			906.818	2.75151			920.394	0.91229													816.759	-3.11866			816.738	4.8684			815.516	-168.103
									915.465	9.58022			907.481	2.56688			920.964	0.94436													817.35	-1.55036			817.282	4.49476			816.016	-168.305
									916.266	11.0165			907.926	2.35942			921.24	1.20611													817.762	-0.07558			817.599	4.12012			816.486	-168.267
									916.599	12.0901			908.501	2.15471			921.812	1.64777													818.21	1.11379			818.16	3.8164			817.041	-168.179
									917.193	12.5944			908.826	1.96954			922.281	2.23534													818.913	1.93406			818.621	3.66872			817.472	-168.178
									917.7	12.3587			909.11	1.81272			922.841	2.86045													819.304	2.38792			819.157	3.70882			817.92	-168.396
									918.027	11.4137			910.062	1.63987			923.358	3.46227													819.784	2.59665			819.552	3.98884			818.551	-168.915
									918.593	9.961			910.37	1.44127			923.945	3.9408													820.136	2.71636			820.11	4.48599			819.026	-169.738
									919.072	8.33997			910.821	1.11397			924.19	4.21442													820.728	2.90625			820.586	5.10221			819.303	-170.751
									919.41	6.91985			911.268	0.74107			924.771	4.34651													821.221	3.20176			821.081	5.69211			819.877	-171.781
									919.794	6.02498			911.772	0.34745			925.381	4.37245													821.654	3.56602			821.749	6.08257			820.334	-172.647
									920.393	5.75639			912.304	0.02476			925.786	4.43846													822.364	3.90865			822.079	6.19287			820.856	-173.223
									920.888	6.04204			912.674	-0.06275			926.21	4.64981													822.725	4.11461			822.577	5.96556			821.173	-173.454
									921.57	6.69075			913.305	0.14619			926.691	5.04757													823.139	4.15113			823.096	5.44856			821.874	-173.423
									921.932	7.38288			913.685	0.73444			927.137	5.60954													823.619	3.98711			823.495	4.77173			822.333	-173.263
									922.428	7.90304			914.104	1.646			927.876	6.20988													824.223	3.65768			824.03	4.07344			822.816	-173.119
									922.921	8.09401			914.861	2.71082			928.33	6.70404													824.658	3.09726			824.454	3.4796			823.274	-173.103
									923.383	7.85484			915.123	3.76996			928.695	6.93203													825.141	2.27103			825.041	3.02092			823.806	-173.262
									923.888	7.24065			915.927	4.57504			929.287	6.8816													825.643	1.18106			825.318	2.74275			824.194	-173.632
									924.595	6.36191			916.315	4.97526			929.594	6.53858													826.047	-0.07005			825.913	2.56115			824.78	-174.262
									924.659	5.37782			916.622	4.88299			930.283	5.95887													826.67	-1.31618			826.667	2.40089			825.165	-175.168
									925.24	4.46712			917.327	4.37938			930.657	5.29511													826.877	-2.30507			826.858	2.25973			825.808	-176.345
									925.795	3.80295			917.58	3.59074			931.139	4.61172													827.447	-2.81929			827.334	2.13104			826.209	-177.693
									926.192	3.43956			918.232	2.69175			931.603	4.0321													827.913	-2.75234			827.867	2.07562			826.558	-179.121
									926.862	3.37822			918.623	1.83782			932.06	3.6715													828.59	-2.17923			828.421	2.14602			827.009	-180.415
									927.32	3.56779			919.032	1.06605			932.639	3.54896													828.965	-1.26522			828.92	2.37688			827.544	-181.446
									927.58	3.93043			919.569	0.36985			932.917	3.69904													829.421	-0.22142			829.177	2.76689			828.106	-182.162
									928.228	4.43183			920.07	-0.29555			933.679	4.08429													830.078	0.74564			830.032	3.2482			828.538	-182.571
									928.79	4.98004			920.74	-1.02599			934.153	4.61291													830.605	1.52147			830.339	3.77786			829.028	-182.643
									929.248	5.46587			920.967	-1.765			934.392	5.26696													830.856	2.09547			830.753	4.26372			829.485	-182.367
									929.691	5.83704			921.544	-2.43464			935.235	5.97115													831.509	2.49226			831.404	4.62119			829.961	-181.689
									930.263	5.9982			921.807	-2.90944			935.42	6.69099													831.908	2.82047			831.888	4.87417			830.558	-180.62
									930.726	5.92362			922.483	-3.0414			936.001	7.30098													832.55	3.10848			832.393	5.01057			830.835	-179.23
									931.118	5.65563			923.063	-2.87298			936.734	7.6954													832.895	3.44514			832.716	5.16859			831.548	-177.698
									931.72	5.23094			923.347	-2.39103			937.035	7.77994													833.425	3.82093			833.27	5.43251			832.194	-176.249
									932.054	4.69892			924.022	-1.73559			937.542	7.51959													833.928	4.2618			833.796	5.84836			832.612	-175.018
									932.727	4.13062			924.475	-1.05267			938.067	6.96949													834.403	4.73012			834.192	6.35411			832.938	-174.01
									933.127	3.53592			924.892	-0.46501			938.356	6.20524													834.919	5.1419			834.817	6.72633			833.53	-173.085
									933.506	3.00392			925.517	-0.0844			938.985	5.42853													835.474	5.48298			835.468	6.843			834.001	-172.048
									934.031	2.61166			925.923	0.03037			939.482	4.82494													835.899	5.73489			835.78	6.59538			834.45	-170.814
									934.654	2.43248			926.493	-0.14318			939.993	4.51885													836.396	5.90127			836.306	6.01153			834.992	-169.417
									934.972	2.48568			927.066	-0.50142			940.247	4.70242													836.78	6.06863			836.484	5.29563			835.547	-168.07
									935.476	2.76938			927.079	-0.93163			940.779	5.378													837.457	6.23648			837.281	4.62397			836.153	-167.027
									936.068	3.16883			927.956	-1.31595			941.399	6.46363													837.8	6.42462			837.653	4.17323			836.601	-166.509
									936.469	3.52875			928.374	-1.56723			942.04	7.75936													838.325	6.53847			838.151	3.95941			837.089	-166.58
									937.141	3.7313			928.79	-1.78761			942.487	8.91648													838.929	6.45017			838.701	3.95028			837.454	-167.146
									937.517	3.65954			929.333	-2.03503			942.829	9.64445													839.288	6.10616			839.021	4.09606			837.869	-168.032
									938.01	3.36061			929.932	-2.41848			943.497	9.76489													839.903	5.46609			839.697	4.28563			838.535	-169.082
									938.42	2.93805			930.286	-2.9687			944.066	9.22419													840.256	4.64516			840.214	4.4508			838.881	-170.166
									938.934	2.5696			930.728	-3.62901			944.348	8.19654													840.707	3.78409			840.53	4.57836			839.462	-171.187
									939.374	2.41011			931.224	-4.30825			944.825	6.95583													841.26	3.04857			841.163	4.66339			839.882	-172.096
[truncated: 2,104 more rows]
[truncated: 19 more columns]

## Sheet: Fig.6B-C
Adhesion force (pN)							Adhesion frequency (%)
AR0382	Δals4112	Δscf1	Δals4112+Δscf1				AR0382	Δals4112	Δscf1	Δals4112+Δscf1
91.2819	131.8	168.754	159.568				66.7969	26.5625	63.6719	68.75
91.6065	136.846	102.446	117.064				60.1562	19.9219	53.5156	32.4219
320.028	114.614	102.726	72.1387				99.25	13.6719	52.7344	21.4844
428.43	145.041	82.6663	149.314				73.4375	60.5469	39.0625	33.9844
651.463	80.2109	114.08	84.1981				92.5781	30.8594	49.6094	32.75
446.653	155.631	92.694	111.459				72.6562		26.5625	64.0625
			195.521				91.4062			94.9219
			168.102							80.8594
Normality was tested using 2 different normailty tests: Shapiro-Wilk and Kolmogorov-Smirnov. Normaility couldn't be rejected at the 0.05 level.
Differences tested using one-way ANOVA with Tukey HSD, α 0.05
		p-value							p-value
AR0382 vs Δals4112		0.0142	*				AR0382 vs Δals4112		0.00171	**
AR0382 vs Δscf1		0.00769	**				AR0382 vs Δscf1		0.03771	*
AR0382 vs Δals4112+Δscf1		0.01009	*				AR0382 vs Δals4112+Δscf1		0.083	ns
Δals4112 vs Δscf1		0.9931	ns				Δals4112 vs Δscf1		0.4885	ns
Δals4112 vs Δals4112+Δscf1		0.9998	ns				Δals4112 vs Δals4112+Δscf1		0.1922	ns
Δscf1 vs Δals4112/Δscf1		0.9826	ns				Δscf1 vs Δals4112+Δscf1		0.9385	ns

## Sheet: Fig.S1A
	AR0382 (OD490)	AR0387 (OD490)
Replicate 1	0.407	0.054
	0.529	0.053
	0.629	0.063
	0.544	0.072
Replicate 2	0.481	0.07
	0.455	0.107
	0.498	0.039
	0.531	0.074
Replicate 3	0.492	0.094
	0.466	0.099
	0.588	0.083
	0.608	0.029
	p-value
AR0382 vs AR0387	0.0003439	***

## Sheet: Fig.S1C
Minutes	AR0382 (OD600)	AR0387 (OD600)
0	2.158	2.195
	2.159	2.18
	2.149	2.191
10	2.073	2.192
	2.068	2.182
	2.063	2.189
20	2.043	2.176
	2.03	2.18
	2.03	2.183
30	2.014	2.188
	2.014	2.187
	2.011	2.189
40	2.002	2.204
	2.002	2.205
	1.999	2.199
50	1.987	2.205
	1.987	2.194
	1.979	2.204
60	1.975	2.196
	1.972	2.194
	1.973	2.197
70	1.966	2.194
	1.961	2.193
	1.964	2.194
80	1.953	2.203
	1.95	2.207
	1.952	2.202
90	1.929	2.207
	1.931	2.2
	1.927	2.199
100	1.917	2.205
	1.921	2.198
	1.922	2.197
110	1.915	2.212
	1.918	2.206
	1.921	2.204
120	1.906	2.205
	1.904	2.206
	1.907	2.21

## Sheet: Fig.S1D
AR0382																					AR0387
Cell#1				Cell#2					inset: force curves												Cell#1					Cell#2					inset: force curves
Adhesion force	Bin center	Relative Frequency		Adhesion force	Bin center	Relative Frequency			Length (x)	Adhesion force (y)			Length (x)	Adhesion force (y)			Length (x)	Adhesion force (y)			Adhesion force	Bin center	Relative Frequency			Adhesion force	Bin center	Relative Frequency			Length (x)	Adhesion force (y)			Length (x)	Adhesion force (y)			Length (x)	Adhesion force (y)
pN	pN	%		pN	pN	%			nm	pN			nm	pN			nm	pN			pN	pN	%			pN	pN	%			nm	pN			nm	pN			nm	pN
331.215	8	0.50505		417.71	8	27.6423			-30.6532	293.503			-39.0961	264.041			-26.5014	202.943			115.837	8	95.3125			75.3714	8	94.9219			-49.4579	196.497			-75.2952	302.777			-61.8681	260.381
200.831	24	0		356.35	24	0			-30.2221	291.368			-38.5849	261.038			-25.9184	200.966			89.8035	24	0			81.9437	24	0			-48.804	195.185			-74.8294	301.798			-61.4048	257.737
171.994	40	0		179.792	40	0			-29.7947	288.724			-38.2848	257.32			-25.4173	198.439			93.0519	40	0.78125			156.899	40	0			-48.2438	193.329			-74.3154	300.446			-61.2596	255.186
190.858	56	0		797.113	56	0			-29.3317	285.466			-37.8837	252.786			-25.0098	195.366			83.357	56	0.39063			105.83	56	2.34375			-47.9873	190.943			-73.9683	298.6			-60.9516	252.795
435.734	72	0		467.104	72	0			-28.9397	281.504			-37.3771	247.377			-24.817	191.756			44.5586	72	0.39063			52.1769	72	1.17188			-47.5844	188.068			-73.3098	296.211			-60.392	250.566
118.641	88	0.50505		475.221	88	0.4065			-28.4759	276.804			-37.0006	241.144			-24.3677	187.686			55.3643	88	2.73438			93.1797	88	0.78125			-47.0796	184.78			-72.9521	293.308			-59.7032	248.351
110.875	104	0.50505		579.94	104	0			-27.9211	271.371			-36.575	234.218			-23.7011	183.22			86.7446	104	0			55.0897	104	0.39063			-46.6813	181.176			-72.4802	290.097			-59.1773	245.946
240.612	120	2.27273		600.738	120	0			-27.741	265.309			-36.3612	226.854			-23.2963	178.366			83.0623	120	0.39063			52.0484	120	0			-46.2329	177.297			-72.2004	286.867			-58.8242	243.121
202.115	136	1.51515		569.319	136	0.4065			-27.2499	258.768			-35.8628	219.353			-22.9762	173.098			44.137	136	0			77.8278	136	0			-45.6726	173.176			-71.8321	283.928			-58.4267	239.779
450.464	152	2.52525		89.4712	152	0.4065			-26.8143	251.925			-35.5136	211.958			-22.5123	167.393			85.194	152	0			61.3143	152	0.39063			-45.2843	168.855			-71.2182	281.518			-58.0874	235.991
156.112	168	1.51515		178.913	168	0.4065			-26.3859	244.988			-35.0588	204.817			-22.2186	161.262			91.5519	168	0			63.2185	168	0			-44.8468	164.436			-70.7594	279.634			-57.5148	231.902
439.221	184	3.28283		378.953	184	0.81301			-26.0139	238.225			-34.6968	198.077			-21.6301	154.837			70.4433	184	0			73.9261	184	0			-44.5976	160.123			-70.1988	278.179			-57.0647	227.872
248.495	200	3.0303		479.264	200	0			-25.6501	231.849			-34.2676	191.716			-21.1145	148.324			0	200	0			57.0092	200	0			-44.061	156.098			-69.8173	276.877			-56.7566	224.186
181.06	216	4.79798		147.978	216	0			-25.2981	225.976			-33.8874	185.671			-21.0744	141.963			0	216	0			0	216	0			-43.6217	152.407			-69.2709	275.473			-56.278	221.022
341.94	232	4.0404		390.765	232	0.81301			-24.7588	220.58			-33.3181	179.829			-20.6743	136.02			0	232	0			0	232	0			-43.2006	148.993			-68.9009	273.704			-55.96	218.433
244.791	248	5.80808		619.111	248	0.81301			-24.3677	215.511			-33.0425	174.15			-20.0804	130.652			0	248	0			0	248	0			-42.5858	145.667			-68.2352	271.447			-55.2883	216.265
144.179	264	2.77778		359.945	264	0.81301			-23.7765	210.499			-32.5923	168.615			-19.5783	125.892			0	264	0			0	264	0			-42.1574	142.289			-67.8536	268.663			-54.8367	214.222
204.238	280	3.78788		442.557	280	0.4065			-23.3036	205.378			-32.0529	163.263			-19.1836	121.685			0	280	0			0	280	0			-41.7054	138.814			-67.551	265.504			-54.2542	212.005
341.886	296	3.78788		634.828	296	0			-23.0635	200.067			-31.8047	158.159			-18.8225	117.824			0	296	0			0	296	0			-41.3944	135.338			-66.9475	262.164			-53.6721	209.453
159.935	312	3.0303		796.021	312	1.21951			-22.5787	194.657			-31.4099	153.323			-18.3323	114.094			0	312	0			0	312	0			-41.0397	132.088			-66.7439	258.878			-53.6516	206.608
182.487	328	3.78788		490.752	328	1.62602			-22.2877	189.342			-30.8324	148.712			-17.8603	110.328			0	328	0			0	328	0			-40.494	129.249			-66.1514	255.787			-53.0624	203.667
436.319	344	3.53535		435.424	344	0.4065			-21.7538	184.226			-30.4368	144.201			-17.2591	106.334			0	344	0			0	344	0			-39.8719	126.904			-65.7813	252.89			-52.6353	200.876
124.255	360	4.29293		800.798	360	2.03252			-21.2854	179.286			-29.8456	139.63			-17.0081	102.094			0	360	0			0	360	0			-39.7027	124.949			-65.1286	250.072			-52.2244	198.385
243.211	376	3.78788		332.26	376	2.03252			-20.9171	174.311			-29.6019	134.88			-16.5779	97.6554			0	376	0			0	376	0			-38.9587	123.162			-64.6536	247.209			-51.5473	196.152
231.634	392	3.0303		1404.95	392	2.03252			-20.2641	169.032			-29.1116	129.906			-16.1286	93.1815			0	392	0			0	392	0			-38.5567	121.299			-64.255	244.304			-51.05	194.04
228.731	408	3.0303		446.32	408	4.87805			-19.9976	163.268			-28.6778	124.819			-15.7221	88.8878			0	408	0			0	408	0			-38.0156	119.159			-64.0264	241.412			-50.797	191.873
117.342	424	2.77778		725.184	424	5.69106			-19.5165	156.934			-28.3686	119.705			-15.1418	85.04			0	424	0			0	424	0			-37.5736	116.668			-63.4301	238.707			-50.3516	189.483
188.551	440	2.52525		245.433	440	5.28455			-19.1154	150.208			-27.7692	114.738			-14.979	81.8594			0	440	0			0	440	0			-37.2889	113.834			-63.0909	236.208			-49.7187	186.746
316.353	456	2.52525		420.126	456	3.25203			-18.9017	143.409			-27.5109	110.053			-14.5106	79.3913			0	456	0			0	456	0			-36.8069	110.739			-62.443	233.827			-49.2552	183.581
209.872	472	3.53535		579.454	472	2.84553			-18.3605	136.851			-27.008	105.714			-13.7694	77.5388			0	472	0			0	472	0			-36.303	107.424			-61.9668	231.405			-48.8661	180.002
258.152	488	1.76768		406.599	488	1.21951			-18.0295	130.843			-26.5687	101.749			-13.4774	75.9992			0	488	0			0	488	0			-35.7773	103.92			-61.416	228.786			-48.5006	176.063
263.7	504	1.0101		688.21	504	1.21951			-17.4801	125.496			-26.0903	98.0945			-12.7671	74.3815			0	504	0			0	504	0			-35.2889	100.273			-61.1372	225.971			-48.0017	171.953
91.3643	520	1.51515		593.502	520	1.21951			-17.1563	120.838			-25.671	94.6636			-12.517	72.339			0	520	0			0	520	0			-35.0516	96.5901			-60.7677	223.1			-47.6057	167.902
408.045	536	2.77778		760.802	536	2.84553			-16.6752	116.723			-25.2572	91.4109			-11.8094	69.625			0	536	0			0	536	0			-34.6123	92.954			-60.2373	220.381			-47.2992	164.081
376.688	552	1.0101		457.367	552	1.21951			-16.0313	112.953			-24.5605	88.2677			-11.5266	66.201			0	552	0			0	552	0			-34.0793	89.5122			-59.9229	218.008			-46.6314	160.654
260.703	568	1.26263		471.575	568	1.62602			-15.8103	109.367			-24.4396	85.2551			-11.1955	62.1881			0	568	0			0	568	0			-33.6246	86.3081			-59.1711	215.977			-46.3209	157.678
226.909	584	1.76768		565.287	584	4.47154			-15.291	105.856			-23.8666	82.3416			-10.628	57.8011			0	584	0			0	584	0			-33.2271	83.3265			-58.8861	214.148			-45.7847	155.068
302.17	600	1.26263		426.894	600	3.25203			-14.7707	102.269			-23.4573	79.4976			-10.3579	53.4051			0	600	0			0	600	0			-32.6523	80.4992			-58.2949	212.373			-45.3476	152.711
347.984	616	0.50505		583.585	616	1.21951			-14.4306	98.4988			-22.968	76.6299			-9.71302	49.2797			0	616	0			0	616	0			-32.2876	77.7296			-57.887	210.475			-44.9066	150.497
405.257	632	0.75758		426.023	632	2.03252			-13.9158	94.4044			-22.2413	73.611			-9.41926	45.7129			0	632	0			0	632	0			-31.7956	74.9788			-57.3451	208.442			-44.3562	148.29
283.691	648	1.51515		496.263	648	0.81301			-13.5402	89.8821			-22.0576	70.4296			-9.05637	42.932			0	648	0			0	648	0			-31.3299	72.326			-57.0135	206.299			-43.9249	145.998
175.017	664	0.50505		370.763	664	0.4065			-12.8444	84.9226			-21.6793	67.0866			-8.61708	40.9098			0	664	0			0	664	0			-30.8961	69.8928			-56.5222	204.092			-43.4217	143.523
399.545	680	0.75758		816.235	680	1.62602			-12.5734	79.6648			-21.1472	63.7156			-8.03319	39.5217			0	680	0			0	680	0			-30.5123	67.835			-56.2378	201.821			-43.1798	140.788
264.364	696	1.0101		418.293	696	1.21951			-12.3224	74.3777			-20.7552	60.4574			-7.34834	38.3873			0	696	0			0	696	0			-30.0366	66.2051			-55.4067	199.38			-42.5902	137.734
283.102	712	0.75758		423.797	712	0.81301			-12.0704	69.3757			-20.1158	57.4203			-6.87722	37.1458			0	712	0			0	712	0			-29.5573	64.9498			-55.0413	196.652			-41.9164	134.277
244.384	728	0.50505		473.15	728	0.4065			-11.1591	64.9138			-19.9412	54.7377			-6.67531	35.5278			0	728	0			0	728	0			-29.0052	63.8895			-54.6553	193.542			-41.6429	130.573
310.04	744	0.50505		706.691	744	0			-10.9463	61.0597			-19.2509	52.4473			-5.965	33.4313			0	744	0			0	744	0			-28.3977	62.8522			-54.1595	190.198			-41.3035	126.835
276.89	760	0.25253		538.974	760	0.81301			-10.5425	57.7826			-18.938	50.5418			-5.65577	30.9651			0	760	0			0	760	0			-27.9357	61.6912			-53.9145	186.8			-40.8469	123.435
119.064	776	0.50505		602.328	776	0.4065			-9.93858	54.9057			-18.557	48.9675			-5.22649	28.2945			0	776	0			0	776	0			-27.7028	60.4763			-53.3583	183.603			-40.5539	120.654
335.217	792	0		335.167	792	2.03252			-9.57296	52.2006			-17.7284	47.5879			-4.70989	25.6582			0	792	0			0	792	0			-27.1462	59.2951			-52.9297	180.721			-39.9708	118.629
241.543	808	0.25253		386.09	808	0.4065			-8.9918	49.4935			-17.4928	46.3033			-4.43614	23.1681			0	808	0			0	808	0			-26.746	58.2855			-52.5887	178.139			-39.4354	117.269
289.219	824	0		584.313	824	0.4065			-8.63345	46.6758			-16.9317	44.9757			-3.71309	20.8402			0	824	0			0	824	0			-26.1813	57.4867			-51.8556	175.664			-38.8879	116.253
476.908	840	0		424.629	840	0			-8.11595	43.7437			-16.4542	43.5962			-3.28472	18.6459			0	840	0			0	840	0			-25.6192	56.831			-51.3196	173.094			-38.2343	115.176
678.726	856	1.0101		710.342	856	0.81301			-7.64392	40.7516			-16.1013	42.2524			-2.98913	16.4778			0	856	0			0	856	0			-25.0608	56.2209			-50.9652	170.342			-38.1575	113.74
132.19	872	0.50505		316.17	872	0.81301			-7.36289	37.7492			-15.6357	41.0151			-2.4016	14.3155			0	872	0			0	872	0			-24.7806	55.6551			-50.8061	167.529			-37.412	111.826
295.385	888	0.25253		413.245	888	0.4065			-6.94907	34.6941			-14.999	39.9686			-1.90501	12.1316			0	888	0			0	888	0			-24.1922	55.1975			-50.1481	164.833			-37.0282	109.588
233.141	904	0.50505		599.458	904	0.81301			-6.18691	31.5491			-14.7271	38.9929			-1.48301	9.92441			0	904	0			0	904	0			-23.9457	54.9805			-49.7362	162.46			-36.4658	107.297
365.254	920	0		632.384	920	0			-5.774	28.1877			-14.1141	37.9758			-1.13103	7.84067			0	920	0			0	920	0			-23.2017	55.0311			-49.2396	160.454			-36.3491	105.27
137.703	936	0		471.966	936	1.62602			-5.43021	24.5303			-13.5829	36.7336			-0.54896	5.96092			0	936	0			0	936	0			-22.8661	55.227			-48.8333	158.71			-35.9105	103.754
265.433	952	0.75758		582.34	952	1.21951			-5.06096	20.7044			-12.9945	35.1842			-0.11513	4.36292			0	952	0			0	952	0			-22.2377	55.2588			-48.1954	157.04			-35.1958	102.701
227.578	968	0		393.882	968	0			-4.49798	16.9198			-12.7544	33.4549			0.24321	3.07354			0	968	0			0	968	0			-21.6083	54.8762			-47.6985	155.201			-34.5347	101.9
690.44	984	0.25253		425.804	984	0			-4.20967	13.5058			-12.356	31.7551			0.9408	2.02244			0	984	0			0	984	0			-21.179	53.9139			-47.4243	153.052			-34.2885	100.951
210.498	1000	0		468.731	1000	0.4065			-3.70399	10.7388			-11.8594	30.324			1.21364	1.1568			0	1000	0			0	1000	0			-20.8844	52.4086			-46.8536	150.589			-33.6157	99.5056
250.895				332.572					-3.23287	8.80146			-11.4411	29.327			1.93851	0.30729			0					0					-20.4123	50.5748			-46.3849	147.9			-33.2662	97.4253
272.111				315.083					-2.78267	7.66827			-10.7262	28.6857			2.28594	-0.67689			0					0					-20.0849	48.7143			-46.0919	145.205			-32.7726	94.7226
356.664				538.007					-2.29337	7.14084			-10.356	28.2594			2.58607	-1.94531			0					0					-19.3882	47.0605			-45.44	142.693			-32.4142	91.6949
229.396				455.954					-1.62762	6.86984			-9.75941	27.8359			3.34914	-3.60715			0					0					-18.918	45.8233			-45.2214	140.515			-32.0861	88.6233
323.567				687.162					-1.25927	6.58149			-9.37469	27.2341			3.81116	-5.71676			0					0					-18.4633	45.0094			-44.659	138.76			-31.4889	85.7455
228.274				445.33					-0.63536	6.07345			-8.91267	26.4076			4.21862	-8.20298			0					0					-18.2414	44.6322			-44.0546	137.353			-31.1822	83.0491
566.537				661.007					-0.26156	5.30912			-8.47975	25.3342			4.49328	-10.8808			0					0					-17.5838	44.4936			-43.7483	136.199			-30.4277	80.4578
468.787				410.699					0.10497	4.36991			-7.87948	24.0701			4.88528	-13.556			0					0					-16.9162	44.3365			-43.0727	135.104			-30.0525	77.8879
212.102				527.821					0.54244	3.34627			-7.50477	22.6559			5.62197	-16.0682			0					0					-16.4351	43.8689			-42.6096	133.955			-29.6072	75.3683
261.547				576.64					1.18454	2.21153			-6.84903	21.1941			5.86389	-18.3305			0					0					-15.9976	42.8922			-42.4305	132.599			-29.2301	73.0017
332.108				681.759					1.64111	0.9362			-6.72443	19.849			6.49235	-20.4019			0					0					-15.5747	41.3584			-41.7334	130.944			-28.9653	71.0155
438.65				396.034					2.2723	-0.54659			-6.00592	18.7817			6.91254	-22.3264			0					0					-15.1918	39.4549			-41.0801	128.952			-28.3505	69.5688
324.888				515.256					2.53969	-2.2447			-5.68214	18.1951			7.39457	-24.1661			0					0					-14.5961	37.4807			-40.9246	126.617			-27.7907	68.6145
437.277				421.505					2.95897	-4.02352			-5.20921	18.0828			7.71562	-25.9861			0					0					-14.4224	35.7679			-40.2877	123.998			-27.1458	67.9862
534.986				686.488					3.37369	-5.66208			-4.52254	18.4421			8.31134	-27.7278			0					0					-13.7357	34.5497			-40.116	121.207			-26.9126	67.4457
452.049				524.327					3.91212	-7.01969			-4.11872	19.0768			8.84885	-29.4275			0					0					-13.2937	33.8654			-39.2926	118.393			-26.342	66.8103
891.941				455.957					4.56786	-8.03499			-3.58394	19.8285			9.15353	-31.0046			0					0					-12.7698	33.5803			-39.172	115.752			-25.8149	65.9655
279.958				1136.76					4.94166	-8.76702			-3.11464	20.4847			9.71469	-32.4168			0					0					-12.3115	33.4752			-38.5025	113.355			-25.3388	64.9147
383.952				405.592					5.19541	-9.32627			-2.61442	20.884			10.1794	-33.5385			0					0					-11.7003	33.3238			-38.1094	111.281			-25.0179	63.6406
326.446				1138.23					5.96575	-9.83728			-2.10328	20.8562			10.6351	-34.1137			0					0					-11.2692	32.9604			-37.7742	109.491			-24.5698	62.1711
420.842				423.101					6.55693	-10.3134			-1.66763	20.3574			11.0989	-33.8657			0					0					-10.829	32.316			-37.1991	107.812			-23.7114	60.5267
603.712				645.904					6.77339	-10.794			-0.90093	19.3501			11.5892	-32.4356			0					0					-10.3324	31.4125			-36.4692	106.144			-23.515	58.7537
379.623				593.634					7.21267	-11.2258			-0.85909	18.0045			11.9239	-29.6286			0					0					-9.97496	30.2689			-36.234	104.401			-23.1315	57.0059
718.307				424.35					7.79839	-11.5724			-0.13332	16.5081			12.7406	-25.4726			0					0					-9.33558	28.9475			-35.7498	102.521			-22.6345	55.4283
208.486				415.525					8.38774	-11.8296			0.01766	15.1273			12.9352	-20.3161			0					0					-8.94723	27.4276			-35.4313	100.609			-22.2396	54.1387
390.015				419.554					8.81611	-12.0197			0.74435	14.0971			13.982	-14.7786			0					0					-8.38425	25.7785			-34.7659	98.7195			-21.6123	53.0493
356.055				481.692					9.25267	-12.2011			1.21637	13.4864			14.6032	-9.55588			0					0					-7.97862	24.0435			-34.4446	96.9215			-21.0496	52.066
380.886				614.538					9.75471	-12.2877			1.67476	13.2824			15.1271	-5.19095			0					0					-7.60391	22.3645			-33.8332	95.1458			-20.693	51.0087
422.962				534.12					10.1576	-12.2095			2.06038	13.3363			15.4918	-1.90455			0					0					-7.12369	20.8773			-33.3636	93.2993			-20.1192	49.8493
232.5				445.74					10.9007	-11.9131			2.69339	13.4595			15.8338	0.37529			0					0					-6.61983	19.7364			-33.1183	91.2707			-19.7244	48.6255
358.783				590.657					11.1653	-11.3261			3.19089	13.4384			16.4904	1.89684			0					0					-6.04049	18.9861			-32.3529	89.0092			-19.3953	47.4432
328.804				401.125					11.5346	-10.4517			3.8048	13.1355			16.9397	2.88768			0					0					-5.6967	18.6075			-31.903	86.6331			-18.8521	46.4448
415.9				354.792					12.2513	-9.48574			4.02762	12.5385			17.4236	3.42316			0					0					-5.19738	18.4875			-31.7111	84.3595			-18.317	45.6242
160.206				637.145					12.8761	-8.65507			4.56331	11.6567			18.1348	3.54936			0					0					-4.70535	18.4168			-31.2603	82.4182			-17.6724	44.912
356.156				235.776					13.4354	-8.20548			5.14357	10.6831			18.5232	3.26732			0					0					-3.98048	18.1728			-30.6944	80.9341			-17.4334	44.2156
259.249				430.543					13.4927	-8.29056			5.4719	9.74288			18.8087	2.61098			0					0					-3.66943	17.5369			-30.2748	79.9121			-16.7222	43.4783
153.214				561.9					14.2431	-8.97218			6.03397	9.04795			19.3717	1.76766			0					0					-3.15739	16.4173			-29.5803	79.2171			-16.5677	42.6898
159.37				494.611					14.796	-10.1995			6.45052	8.68859			19.8674	0.91424			0					0					-2.75994	14.8123			-29.1135	78.6201			-15.8829	41.911
218.608				624.746					15.1707	-11.785			7.00076	8.69925			20.2958	0.18496			0					0					-2.18787	12.8718			-28.7328	77.9347			-15.3952	41.1336
198.992				792.411					15.5282	-13.4959			7.35001	9.00016			20.8633	-0.35953			0					0					-1.875	10.7999			-28.4033	77.0302			-14.9531	40.2954
222.659				400.5					16.1212	-14.9772			8.06123	9.45025			21.4062	-0.7199			0					0					-1.37842	8.84131			-27.7058	75.791			-14.4947	39.3328
390.523				279.024					16.4259	-15.9732			8.55509	9.84203			21.5026	-0.89796			0					0					-0.91093	7.21774			-27.2871	74.2038			-13.9756	38.1459
281.666				1021.23					16.9706	-16.3272			8.96618	10.0629			22.5195	-1.00851			0					0					-0.40707	6.0492			-26.6394	72.3275			-13.4429	36.7379
533.347				446.572					17.4308	-16.08			9.51915	10.0004			22.7323	-1.12172			0					0					0.01129	5.37352			-26.5326	70.2091			-13.0547	35.1774
368.438				689.209					18.0502	-15.4252			9.84111	9.69023			23.2298	-1.32046			0					0					0.48878	5.12346			-25.9288	68.0165			-12.5623	33.626
400.127				849.565					18.6232	-14.6776			10.5078	9.15774			23.7482	-1.68566			0					0					1.11633	5.17184			-25.5274	65.9068			-12.3296	32.2276
278.866				957.927					19.0579	-14.1769			10.8516	8.47708			24.3084	-2.28927			0					0					1.49832	5.31335			-25.0083	63.9408			-11.6471	31.1405
561.058				376.854					19.5754	-14.0309			11.3618	7.72305			24.735	-3.08401			0					0					2.14224	5.37721			-24.5072	62.1683			-11.044	30.3308
253.817				357.286					19.932	-14.2726			11.923	6.94539			25.1061	-3.97338			0					0					2.51058	5.26143			-24.0167	60.5611			-10.8094	29.7471
452.481				535.265					20.4767	-14.8165			12.4032	6.26624			25.6172	-4.88068			0					0					3.01535	4.9874			-23.6069	59.0726			-10.1625	29.2386
577.29				460.73					20.9042	-15.5333			12.6778	5.8075			26.2802	-5.68493			0					0					3.50921	4.66757			-23.2351	57.6449			-9.73021	28.6861
336.445				446.938					21.5263	-16.2964			13.2845	5.71771			26.3894	-6.32237			0					0					3.94304	4.45465			-22.522	56.2747			-9.15203	28.0106
255.435				556.813					21.8364	-17.0388			13.6883	6.04746			27.1133	-6.87214			0					0					4.36141	4.4349			-22.2721	54.9344			-8.72466	27.1716
449.458				378.87					22.4576	-17.7587			14.4404	6.71236			27.6654	-7.30426			0					0					4.91165	4.5718			-21.651	53.633			-8.40032	26.1575
295.953				600.24					22.796	-18.4544			14.6123	7.49996			28.1711	-7.64571			0					0					5.4437	4.66028			-21.1479	52.3866			-7.86973	24.9468
285.994				780.85					23.2471	-19.1895			15.3472	8.16347			28.4294	-7.80699			0					0					6.0467	4.4401			-20.8759	51.2153			-7.2259	23.4873
483.493				622.311					24.0429	-19.9952			15.9884	8.50097			28.9714	-7.61112			0					0					6.52509	3.75029			-20.3328	50.1233			-6.82003	21.7147
529.602				454.473					24.3321	-20.9536			16.3149	8.41958			29.5917	-6.85259			0					0					6.98075	2.53676			-19.782	49.0715			-6.29992	19.7252
534.725				503.271					24.6795	-22.0111			16.7014	8.01364			29.8454	-5.36651			0					0					7.26269	1.00676			-19.2823	47.959			-6.04918	17.7397
605.295				442.604					25.2461	-23.1605			17.1571	7.48609			30.513	-3.18156			0					0					7.752	-0.53445			-18.8303	46.7079			-5.56264	16.0154
492.639				410.721					25.73	-24.2754			17.6764	7.07757			31.1233	-0.42681			0					0					8.23313	-1.77472			-18.3639	45.2228			-5.03363	14.8646
289.929				959.415					26.3494	-25.2675			18.2112	6.92548			31.5653	2.66035			0					0					8.72698	-2.5027			-17.8783	43.4735			-4.62831	14.4343
504.153				574.445					26.5394	-25.9768			18.7432	7.04205			32.1801	5.74876			0					0					9.28632	-2.68258			-17.592	41.5505			-4.16704	14.6931
673.934				878.006					27.1788	-26.3273			18.9997	7.33988			32.7185	8.56335			0					0					9.69105	-2.40422			-16.8372	39.5237			-3.42587	15.447
334.379				753.453					27.5499	-26.2599			19.7792	7.66969			33.1906	10.8884			0					0					10.1849	-1.8673			-16.5584	37.5409			-2.96253	16.359
715.155				531.072					28.2457	-25.8286			20.2539	7.81345			33.6844	12.555			0					0					10.8697	-1.33916			-16.107	35.7512			-2.60635	17.0481
252.557				942.554					28.5158	-25.1785			20.6814	7.72673			34.1564	13.4385			0					0					11.2272	-1.05246			-15.6295	34.2444			-2.00737	17.2296
242.979				355.521					29.3288	-24.4349			21.1716	7.4059			34.9086	13.559			0					0					11.7456	-1.13646			-15.2417	33.08			-1.43825	16.6898
396.937				320.663					29.5844	-23.7602			21.5463	7.00973			35.1396	13.067			0					0					12.2958	-1.64869			-14.5216	32.2274			-1.04074	15.4033
360.448				682.784					30.1883	-23.329			22.0802	6.68641			35.6453	12.2118			0					0					12.7069	-2.54703			-14.1789	31.5811			-0.53265	13.5075
450.503				592.618					30.5449	-23.2092			22.6604	6.65394			35.9818	11.3132			0					0					13.1298	-3.7423			-13.746	31.0021			-0.16529	11.2934
630.319				873.701					31.1706	-23.4784			22.8924	7.00588			36.5221	10.6307			0					0					13.48	-5.11287			-13.1455	30.3076			0.10013	9.13062
189.881				901.108					31.6826	-24.1202			23.6336	7.7266			36.9486	10.2201			0					0					14.1648	-6.568			-12.6747	29.4213			0.6999	7.32205
209.03				789.833					32.1092	-25.1275			24.0938	8.72354			37.6407	10.0019			0					0					14.7433	-8.03102			-12.1906	28.3123			1.30077	6.04126
251.387				888.981					32.543	-26.3468			24.4758	9.78835			38.1455	9.77554			0					0					15.0298	-9.38736			-11.7352	27.1715			1.6265	5.35455
349.036				433.965					32.9214	-27.61			25.3053	10.7305			38.5229	9.37936			0					0					15.2981	-10.4393			-11.3514	26.261			2.20639	5.21139
235.743				386.847					33.4425	-28.6995			25.4835	11.3995			39.0441	8.75289			0					0					16.0129	-10.9977			-10.9104	25.8151			2.68245	5.46952
535.674				581.846					34.0873	-29.5251			26.2366	11.7363			39.407	7.9508			0					0					16.4431	-10.9743			-10.4746	25.956			3.13769	6.05534
339.932				443.273					34.3165	-30.0524			26.3785	11.7812			39.959	7.18933			0					0					16.9934	-10.3531			-9.92039	26.5855			3.71088	6.86851
373.961				691.88					34.9159	-30.4037			27.1452	11.5368			40.4111	6.60172			0					0					17.3408	-9.27728			-9.12723	27.491			4.15703	7.76816
249.602				409.129					35.4252	-30.7123			27.5735	11.0718			40.9431	6.36628			0					0					18.0111	-8.00248			-8.7727	28.381			4.68711	8.61285
468.123				509.609					36.0464	-31.1405			27.9173	10.4163			41.316	6.51542			0					0					18.6723	-6.78387			-8.22311	29.0264			5.1904	9.22493
514.776				263.504					36.4402	-31.6785			28.5094	9.55942			41.8908	7.03228			0					0					18.9952	-5.86498			-7.96656	29.3161			5.71013	9.43872
568.883				444.194					36.8231	-32.2168			29.1351	8.63627			42.3546	7.80337			0					0					19.3781	-5.32578			-7.48865	29.2			6.23697	9.16537
579				933.443					37.2478	-32.5894			29.4071	7.77352			42.9822	8.64456			0					0					20.1375	-5.10352			-6.68719	28.6918			6.76588	8.4306
279.781				409.852					37.7599	-32.6417			29.7518	7.11465			43.4551	9.39761			0					0					20.5168	-5.08902			-6.26308	27.8493			6.93657	7.2985
522.273				953.372					38.3683	-32.3817			30.2966	6.8386			43.8326	9.87243			0					0					20.7687	-5.16501			-5.89736	26.7358			7.58285	5.93996
319.595				907.169					38.8049	-31.8859			31.0514	6.94131			44.511	10.0067			0					0					21.4344	-5.19888			-5.55309	25.4994			8.11428	4.49337
289.664				450.641					39.366	-31.3525			31.2715	7.39627			44.7985	9.84124			0					0					21.9692	-5.17106			-5.0921	24.3147			8.51436	3.09366
194.675				229.745					39.9126	-30.9882			31.9564	8.03057			45.4715	9.47505			0					0					22.4185	-5.12167			-4.48349	23.2744			8.98535	1.86196
300.473				350.042					40.2201	-30.8813			32.3984	8.67218			45.7843	9.08475			0					0					23.0006	-5.20284			-3.91783	22.418			9.39113	0.85943
590.883				1009.82					40.814	-30.9838			32.7458	9.19028			46.2154	8.86847			0					0					23.3307	-5.5434			-3.49648	21.7084			9.94357	0.08781
405.952				1445.82					41.3278	-31.2			33.5316	9.48123			46.8557	8.91945			0					0					23.7991	-6.234			-3.1869	21.0653			10.4061	-0.45221
513.685				1000.91					41.7234	-31.3152			33.9382	9.56668			47.1741	9.30067			0					0					24.4985	-7.36281			-2.64394	20.373			10.9655	-0.83136
446.597				440.583					42.2491	-31.1355			34.2947	9.54902			47.9344	9.91928			0					0					24.9505	-8.89478			-1.92387	19.504			11.3545	-1.14119
267.175				537.123					42.5538	-30.3971			34.7694	9.53532			48.2345	10.6103			0					0					25.2434	-10.6708			-1.62221	18.3797			11.9531	-1.44954
433.056				943.823					43.3815	-28.9248			35.226	9.6248			48.6984	11.1534			0					0					25.6318	-12.4428			-1.21257	16.9472			12.3036	-1.86102
479.151				265.007					43.688	-26.5853			35.7954	9.79556			49.4951	11.3389			0					0					26.1465	-13.941			-0.54629	15.2692			12.8315	-2.3551
376.503				581.723					44.1363	-23.4274			36.4802	9.99904			49.7952	11.0646			0					0					26.7559	-14.9343			-0.17402	13.5288			13.4401	-2.89418
208.452				624.674					44.6457	-19.66			36.7258	10.1025			50.2591	10.3285			0					0					27.1088	-15.2994			0.04809	11.8901			13.911	-3.33039
511.139				248.877					45.5742	-15.6462			37.3124	10.0261			50.802	9.35235			0					0					27.559	-15.0575			0.69548	10.5472			14.0686	-3.49298
509.946				319.907					45.8853	-11.836			37.7571	9.8351			51.0403	8.37482			0					0					28.1911	-14.3134			1.1477	9.58835			14.7228	-3.27575
280.698				1129.66					46.5829	-8.59298			38.301	9.61514			51.6579	7.6599			0					0					28.6195	-13.3002			1.72449	8.97095			15.2644	-2.69115
222.58				133.801					46.8275	-6.14242			38.6994	9.54089			52.1344	7.38317			0					0					29.2988	-12.2691			2.2296	8.56942			15.791	-1.90531
463.466				928.407					47.5397	-4.5834			39.0823	9.71537			52.5928	7.54441			0					0					29.6481	-11.4282			2.64539	8.30988			16.3832	-1.14382
643.215				591.62					47.8971	-3.84956			39.7662	10.1213			53.1121	8.07166			0					0					30.1347	-10.9058			3.01536	8.14624			16.8115	-0.56377
647.343				409.068					48.4528	-3.87267			40.1673	10.6283			53.7588	8.77251			0					0					30.7986	-10.7099			3.55515	8.00633			17.4261	-0.18706
414.263				590.014					48.9403	-4.49182			40.7448	10.9724			54.1608	9.49077			0					0					31.1679	-10.7173			4.35599	7.87417			17.5891	0.12759
317.106				853.563					49.425	-5.53517			41.4124	11.01			54.5473	10.177			0					0					31.5599	-10.7038			4.47564	7.74513			18.1491	0.5434
131.855				1286.54					49.8161	-6.74455			41.5597	10.6233			55.2213	10.7943			0					0					31.9809	-10.4885			5.00116	7.60165			18.7064	1.11755
157.007				1129.69					50.2654	-7.87765			42.2564	9.86605			55.5851	11.3906			0					0					32.5939	-10.0354			5.64771	7.45085			19.2805	1.74475
315.059				459.02					50.7493	-8.59068			42.6511	8.95618			56.1262	12.0143			0					0					33.1123	-9.41614			6.0991	7.31273			19.8254	2.18244
280.922				558.081					51.255	-8.72147			43.0149	8.17947			56.5619	12.6369			0					0					33.7044	-8.82579			6.39686	7.2004			20.346	2.24397
392.176				528.321					51.6388	-8.20198			43.5179	7.77796			57.1285	13.2496			0					0					34.1683	-8.47027			7.08916	7.12783			20.7079	1.84825
462.326				454.892					52.2863	-7.15511			44.0654	7.88962			57.6978	13.8498			0					0					34.6103	-8.44339			7.58508	7.07526			21.2788	1.07279
691.22				440.542					52.862	-5.77454			44.6448	8.47719			58.0971	14.4293			0					0					35.0505	-8.72322			7.87362	6.98956			21.4559	0.06759
354.533				600.88					53.2477	-4.34149			44.7921	9.37427			58.5964	15.0628			0					0					35.4734	-9.23345			8.54443	6.82029			22.1144	-1.03573
390.078				165.374					53.7779	-3.09968			45.8835	10.3286			59.0802	15.875			0					0					36.1446	-9.81919			9.03608	6.51114			22.7399	-2.11693
419.404				372.583					54.43	-2.2561			46.0881	11.077			59.4595	16.884			0					0					36.5393	-10.3295			9.38637	6.06956			23.1655	-3.12048
366.28				431.264					54.6774	-1.9692			46.5829	11.4945			60.1061	17.9949			0					0					36.8404	-10.6625			10.0395	5.46441			23.5001	-3.99716
357.64				549.4					55.3186	-2.30892			47.0249	11.469			60.6637	18.9315			0					0					37.558	-10.79			10.3677	4.7513			23.9845	-4.61397
366.731				792.829					55.8725	-3.22741			47.6279	11.0452			61.123	19.3614			0					0					37.9536	-10.706			10.8447	4.02693			24.4738	-4.88519
357.907				402.623					56.2071	-4.54417			47.9853	10.3232			61.6568	18.9826			0					0					38.442	-10.5068			11.4154	3.38278			24.952	-4.81439
607.862				1064.74					56.681	-6.00993			48.5128	9.40732			62.3462	17.7562			0					0					38.894	-10.3196			11.8908	2.90373			25.5961	-4.46397
240.383				652.342					57.0548	-7.32571			49.0412	8.42289			62.52	15.9053			0					0					39.6425	-10.3033			12.2311	2.65811			26.0359	-4.0005
484.352				0					57.515	-8.26776			49.3632	7.47204			62.8028	13.8907			0					0					39.9681	-10.5521			12.7993	2.67465			26.4854	-3.53049
321.519				0					58.098	-8.7436			49.9344	6.65906			63.3321	12.2061			0					0					40.3019	-11.0572			13.3353	2.84922			26.9848	-3.15344
462.57				0					58.6983	-8.82231			50.3154	5.97384			63.7478	11.209			0					0					40.9495	-11.7412			13.8246	3.04368			27.6519	-2.84052
515.299				0					59.073	-8.66489			50.9876	5.46891			64.5227	10.9679			0					0					41.4515	-12.4565			14.2883	3.06345			27.7761	-2.52215
219.459				0					59.5277	-8.42994			51.4114	5.04124			64.7946	11.2295			0					0					41.7334	-13.0885			14.8597	2.7235			28.4614	-2.17359
297.269				0					60.0752	-8.26706			51.7634	4.69433			65.5331	11.6738			0					0					42.2955	-13.5783			15.3791	2.0133			29.0323	-1.85061
197.21				0					60.701	-8.21811			52.3727	4.43337			65.8205	11.9335			0					0					42.8285	-13.8691			15.7244	1.02536			29.4097	-1.66035
645.017				0					60.9638	-8.24588			52.8648	4.33963			66.5308	11.791			0					0					43.4151	-14.0043			16.226	-0.02685			30.0443	-1.73368
536.826				0					61.555	-8.29462			53.3341	4.46615			66.9246	11.2014			0					0					43.7826	-13.9954			16.5154	-0.88442			30.4748	-2.13445
469.401				0					61.9715	-8.29947			53.6833	4.87148			67.2621	10.3075			0					0					44.1864	-13.8869			17.1215	-1.40829			30.9489	-2.78022
640.05				0					62.4545	-8.27863			54.2045	5.49619			67.6932	9.27785			0					0					44.7621	-13.6579			17.6587	-1.64218			31.3349	-3.52447
478.44				0					63.0456	-8.29044			54.8857	6.19397			68.3162	8.28332			0					0					45.3278	-13.3832			18.2264	-1.72613			31.7816	-4.18302
813.803				0					63.5695	-8.43904			55.5159	6.80625			68.8737	7.4777			0					0					45.8016	-13.1918			18.7131	-1.83659			32.3146	-4.62324
252.774				0					63.9715	-8.73543			55.6696	7.15672			69.0656	6.89332			0					0					46.2036	-13.1706			19.0841	-2.05961			32.8236	-4.80671
446.278				0					64.4754	-9.1851			56.2927	7.13116			69.7741	6.52934			0					0					46.742	-13.3671			19.6203	-2.42258			33.343	-4.81744
452.308				0					64.8928	-9.67723			56.7883	6.68861			70.1543	6.26252			0					0					47.3751	-13.8034			20.064	-2.88426			33.8796	-4.77274
210.631				0					65.3639	-10.1217			57.3113	5.84295			70.7172	5.98116			0					0					47.6797	-14.3608			20.4536	-3.40059			34.2779	-4.73029
390.82				0					65.8915	-10.3986			57.7033	4.68366			71.2447	5.54789			0					0					48.1454	-14.8587			21.1066	-4.00456			34.7346	-4.75426
246.558				0					66.4399	-10.497			58.3263	3.39175			71.7486	4.96871			0					0					48.4983	-15.1024			21.659	-4.65244			35.3295	-4.8155
306.133				0					66.8537	-10.4273			58.5646	2.18118			72.1442	4.35687			0					0					49.2077	-14.9457			22.0484	-5.33303			35.7685	-4.85479
436.624				0					67.4067	-10.1966			58.9875	1.29589			72.5007	3.91352			0					0					49.7261	-14.3939			22.4294	-5.85123			36.2241	-4.78203
510.309				0					67.7305	-9.85468			59.5768	0.84745			73.0519	3.84519			0					0					50.038	-13.5401			22.7819	-6.05947			36.7617	-4.51778
747.065				0					68.4371	-9.47882			60.2026	0.89704			73.5485	4.25967			0					0					50.5665	-12.6014			23.4621	-5.87496			37.1002	-4.07255
328.097				0					68.8027	-9.1327			60.5391	1.38381			74.0487	5.13957			0					0					51.2831	-11.8664			23.9641	-5.35369			37.8004	-3.47819
367.187				0					69.4467	-8.93274			61.0711	2.12914			74.6599	6.22863			0					0					51.7288	-11.6146			24.4722	-4.68206			38.1429	-2.88951
306.3				0					69.7623	-8.96356			61.6832	3.03668			75.1483	7.30427			0					0					52.2117	-11.9916			25.0777	-4.05054			38.8667	-2.42397
322.873				0					70.3443	-9.24304			62.0643	3.98377			75.6394	8.08075			0					0					52.6638	-12.977			25.4054	-3.57164			39.3131	-2.11126
494.674				0					70.8727	-9.76621			62.63	4.93741			76.1169	8.3966			0					0					53.0012	-14.3658			26.08	-3.20836			39.6643	-1.89765
493.033				0					71.152	-10.4529			62.9911	5.84884			76.6362	8.26666			0					0					53.6042	-15.8335			26.1903	-2.81437			40.075	-1.70688
318.955				0					71.8068	-11.1821			63.7705	6.70126			77.1073	7.8183			0					0					53.8916	-17.0707			26.9624	-2.27588			40.5814	-1.44251
323.559				0					72.2925	-11.882			63.9888	7.44627			77.5503	7.28356			0					0					54.4127	-17.8679			27.4226	-1.52637			41.2788	-1.15862
958.887				0					72.5771	-12.3971			64.6263	8.04615			77.874	6.89046			0					0					54.953	-18.1943			27.8912	-0.65847			41.6435	-0.96052
865.058				0					73.2247	-12.6856			65.132	8.48031			78.5161	6.76045			0					0					55.4741	-18.2355			28.4409	0.16939			42.3856	-0.95047
714.146				0					73.6995	-12.6797			65.5158	8.73214			78.8763	6.91985			0					0					55.9898	-18.2005			29.0031	0.76968			42.5938	-1.17118
470.362				0					74.0787	-12.4223			66.187	8.77847			79.6667	7.30641			0					0					56.6101	-18.2425			29.462	0.99995			42.9958	-1.50515
380.116				0					74.7327	-11.9737			66.4663	8.68367			80.0714	7.82043			0					0					56.882	-18.4153			29.8168	0.79188			43.5801	-1.87452
900.91				0					75.1292	-11.4662			67.0683	8.50257			80.3524	8.35261			0					0					57.385	-18.6583			30.4352	0.1974			44.1806	-2.1758
336.618				0					75.6758	-11.0101			67.5749	8.30602			80.98	8.83443			0					0					57.8179	-18.8085			30.9858	-0.68155			44.479	-2.45063
1146.57				0					76.2815	-10.6366			67.9451	8.17659			81.4147	9.20569			0					0					58.3909	-18.7746			31.1898	-1.63875			45.1442	-2.80347
771.084				0					76.478	-10.4538			68.4226	8.094			82.0232	9.40786			0					0					58.8656	-18.5444			31.8247	-2.50973			45.5495	-3.33753
660.052				0					77.1965	-10.4619			68.9837	8.06259			82.6753	9.39314			0					0					59.4631	-18.2009			32.175	-3.09066			46.1191	-4.06604
571.847				0					77.613	-10.643			69.6004	7.92971			82.8481	9.17437			0					0					59.7878	-17.8487			32.8354	-3.30009			46.5102	-4.8461
107.083				0					78.1314	-11.0114			69.9842	7.63991			83.2564	8.77661			0					0					60.3926	-17.5674			33.2054	-3.10493			46.8751	-5.55544
376.233				0					78.6226	-11.4949			70.3189	7.1552			83.9386	8.26351			0					0					60.9302	-17.3705			33.7205	-2.57829			47.4375	-5.97094
417.634				0					79.05	-12.0364			71.0701	6.48699			84.5124	7.65225			0					0					61.3894	-17.2256			34.2325	-1.87651			47.8287	-6.02698
248.676				0					79.4802	-12.5867			71.3639	5.7736			84.8599	6.98036			0					0					61.6386	-17.0209			34.787	-1.14372			48.5165	-5.76813
479.229				0					79.8849	-13.1036			71.8059	5.09532			85.2892	6.24365			0					0					62.3208	-16.7153			35.3271	-0.52491			48.9842	-5.27106
235.959				0					80.738	-13.6452			72.3598	4.57009			85.8139	5.47471			0					0					62.9492	-16.2895			35.7363	-0.07797			49.4653	-4.63089
204.524				0					80.9772	-14.2632			72.7781	4.24405			86.3223	4.7235			0					0					63.2648	-15.7322			36.2387	0.24022			49.8576	-3.95187
189.646				0					81.3865	-14.9912			73.4575	4.12524			86.7452	4.03345			0					0					63.776	-15.072			36.7369	0.4479			50.3464	-3.26119
215.762				0					81.9913	-15.8485			73.7067	4.1778			87.2728	3.4061			0					0					64.2917	-14.3766			37.0444	0.57039			51.0645	-2.68455
185.755				0					82.4324	-16.7198			74.3307	4.37682			87.7639	2.9023			0					0					64.8037	-13.712			37.7713	0.54869			51.3238	-2.28037
196.113				0					82.9508	-17.4902			74.82	4.69217			88.1686	2.53232			0					0					65.3476	-13.1548			38.3594	0.36306			51.9896	-2.08412
478.94				0					83.2883	-18.0532			75.2174	5.08614			88.7343	2.27123			0					0					65.7596	-12.7866			38.6165	-0.05123			52.5282	-2.07001
395.421				0					83.7903	-18.374			75.8713	5.432			89.2182	2.11793			0					0					66.3871	-12.6478			39.1561	-0.69506			52.7939	-2.12875
430.153				0					84.3742	-18.5125			76.2642	5.75631			89.5392	2.01193			0					0					66.8119	-12.711			39.6333	-1.44661			53.2875	-2.13869
557.822				0					84.8471	-18.6641			76.819	6.0144			90.2423	1.83108			0					0					67.0711	-13.0107			40.0145	-2.17839			53.7517	-2.00665
314.706				0					85.4538	-18.9934			77.2092	6.17883			90.727	1.48195			0					0					67.7823	-13.5002			40.6292	-2.7027			54.3391	-1.79039
213.164				0					85.8349	-19.5873			77.7685	6.20748			91.3209	1.01688			0					0					68.3353	-14.1729			41.165	-2.88896			55.1226	-1.54209
299.004				0					86.2569	-20.4807			78.1696	5.97657			91.4673	0.61477			0					0					68.73	-15.034			41.4562	-2.62718			55.2621	-1.41353
381.118				0					86.7534	-21.5593			78.7653	5.43889			91.9776	0.49299			0					0					69.0683	-15.9903			41.8284	-1.90858			55.7034	-1.46466
280.191				0					87.2518	-22.6474			79.3165	4.53431			92.6233	0.85152			0					0					69.7468	-16.8672			42.6412	-0.90981			56.3143	-1.65624
740.512				0					87.6866	-23.5511			79.9331	3.38101			92.9389	1.71592			0					0					70.0706	-17.4856			43.2089	0.15079			56.878	-2.04481
191.616				0					88.1377	-24.1554			79.8167	2.23589			93.5747	2.88868			0					0					70.4426	-17.7546			43.488	0.96319			57.2401	-2.62071
153.964				0					88.7534	-24.46			80.4943	1.37208			94.2631	4.07397			0					0					71.1547	-17.6287			44.2099	1.26163			57.7698	-3.36813
346.808				0					88.9599	-24.5686			81.0773	0.97413			94.7561	5.01106			0					0					71.4967	-17.2537			44.5456	0.97541			58.3117	-4.26983
522.283				0					89.7666	-24.6541			81.6403	1.03377			95.0217	5.46939			0					0					72.2325	-16.844			45.1122	0.22557			58.5401	-5.25013
354.76				0					90.265	-24.9515			82.1614	1.43878			95.5637	5.49687			0					0					72.6954	-16.6261			45.4331	-0.74748			59.3811	-6.14108
386.657									90.6288	-25.5883			82.4752	1.99188			96.1422	5.19026													73.0073	-16.6887			45.9187	-1.59395			59.5144	-6.8403
297.096									91.1481	-26.6251			83.1664	2.56873			96.4878	4.72147													73.4766	-17.0109			46.4088	-2.04812			59.9638	-7.25272
908.933									91.4755	-27.9639			83.602	3.06817			97.0262	4.17095													74.1451	-17.4671			46.7639	-2.05061			60.7732	-7.44367
231.419									92.1204	-29.4315			83.9486	3.44001			97.5637	3.64397													74.6253	-17.9357			47.5329	-1.6771			61.1076	-7.53478
260.069									92.5151	-30.7824			84.5243	3.67121			97.9621	3.21089													74.6526	-18.2959			47.9756	-1.15226			61.5943	-7.66053
217.411									92.9235	-31.8556			85.19	3.70737			98.4159	2.87028													75.6239	-18.492			48.4402	-0.70211			62.1644	-7.9234
350.913									93.37	-32.5998			85.5893	3.48141			99.1353	2.66048													76.0451	-18.5484			48.9611	-0.52913			62.6371	-8.31199
660.284									93.9676	-33.0931			85.9513	3.04459			99.2281	2.57784													76.468	-18.4487			49.4721	-0.66183			62.8541	-8.74185
202.333									94.4223	-33.534			86.4851	2.50895			99.9684	2.57068													76.9263	-18.2472			49.7801	-1.07924			63.6474	-9.09453
364.723									95.068	-34.091			86.9281	2.02795			100.509	2.54009													77.3902	-17.9119			50.3903	-1.65981			64.0119	-9.23675
356.118									95.4409	-34.8868			87.4947	1.69923			101.007	2.41041													77.8622	-17.4809			50.9176	-2.30542			64.4364	-9.06517
403.758									95.9084	-35.8828			87.9139	1.59718			101.285	2.18826													78.5407	-17.0049			51.1739	-2.95411			64.9558	-8.57457
288.426									96.1749	-36.979			88.2878	1.76889			101.917	1.81196													79.0409	-16.4805			51.9532	-3.52503			65.5252	-7.84447
619.209									96.8343	-38.0413			89.1327	2.19863			102.426	1.36995													79.332	-15.8788			52.2343	-3.95146			66.0558	-6.96347
626.739									97.35	-38.9496			89.34	2.8431			102.757	0.93606													79.8877	-15.1492			52.7414	-4.14895			66.3862	-6.06312
272.757									97.8547	-39.6926			89.8648	3.6128			103.372	0.58803													80.336	-14.3187			53.2397	-4.02805			67.1187	-5.23135
331.134									98.1258	-40.3446			90.3578	4.44655			103.857	0.38835													80.9654	-13.4211			53.7451	-3.57151			67.6198	-4.54287
589.631									98.7751	-41.0107			90.9635	5.23414			104.254	0.4335													81.3929	-12.5819			54.1701	-2.79399			67.7723	-4.01388
225.27									99.2881	-41.7927			91.6383	5.85887			104.71	0.6582													82.1086	-11.9107			54.7591	-1.7918			68.5757	-3.67689
212.914									99.651	-42.7722			91.7829	6.31632			105.204	1.03513													82.4315	-11.5021			55.3959	-0.70024			68.9366	-3.49772
193.313									100.38	-43.9233			92.345	6.57871			106.085	1.42753													82.7362	-11.3583			55.6884	0.34771			69.5945	-3.5024
254.993									100.573	-45.1453			92.8971	6.68399			106.109	1.73012													83.4174	-11.4829			56.1907	1.21361			69.9884	-3.67939
246.974									101.017	-46.281			93.4018	6.7183			106.809	1.82477													83.9113	-11.903			56.8817	1.74333			70.2871	-4.00378
261.858									101.565	-47.1925			93.9876	6.64291			107.297	1.7277													84.3533	-12.6574			57.2144	1.93723			70.8513	-4.4568
221.095									102.132	-47.7938			94.2195	6.51157			107.757	1.54155													84.9999	-13.7826			57.8625	1.79824			71.5843	-5.01652
231.69									102.549	-48.0796			94.8079	6.24301			108.168	1.31717													85.2691	-15.1905			58.2005	1.49961			71.9051	-5.6495
863.046									103.071	-48.0869			95.3855	5.82325			108.739	1.17772													85.6684	-16.6946			58.6761	1.18434			72.275	-6.29861
872.714									103.544	-47.9107			95.762	5.20569			109.078	1.17264													86.2923	-18.0409			58.9823	1.02279			72.7899	-6.86048
564.008									104.027	-47.5759			96.5151	4.44284			109.767	1.29618													86.5788	-19.0129			59.6345	0.97665			73.3558	-7.30148
361.285									104.492	-47.1354			96.6906	3.67145			110.173	1.49429													87.1482	-19.4214			60.2991	0.91592			73.7357	-7.58787
419.164									105.065	-46.7014			96.9252	2.9586			110.746	1.69262													87.7348	-19.2577			60.7698	0.62619			74.2928	-7.76849
752.978									105.476	-46.387			97.8702	2.36061			111.061	1.87008													88.1168	-18.6444			61.1078	0.03874			74.866	-7.88626
596.009									106.089	-46.3649			98.1658	1.84276			111.565	1.85887													88.6443	-17.766			61.6817	-0.80015			75.2841	-7.97327
1281.29									106.521	-46.7597			98.8024	1.28956			112.37	1.64982													89.1827	-16.8732			61.9424	-1.64873			75.6509	-8.03163
598.134									107.034	-47.5787			99.1153	0.62239			112.568	1.187													89.7402	-16.2568			62.619	-2.27492			76.3261	-8.01816
721.552									107.508	-48.682			99.7438	-0.22995			113.102	0.48593													90.335	-16.0268			62.7587	-2.56473			76.6228	-7.87476
119.362									107.824	-49.8596			99.9939	-1.21847			113.559	-0.39111													90.6779	-16.193			63.6122	-2.58533			77.1953	-7.62379
152.494									108.324	-50.9042			100.533	-2.28676			114.053	-1.3823													91.0262	-16.6401			64.1037	-2.56634			77.8235	-7.29569
493.28									108.831	-51.6787			101.177	-3.37654			114.465	-2.40955													91.6156	-17.1726			64.744	-2.7178			78.1831	-6.9293
366.076									109.394	-52.1469			101.577	-4.35428			115.04	-3.41131													92.0576	-17.6508			64.7985	-3.13487			78.707	-6.50615
311.863									109.848	-52.3436			101.965	-5.13067			115.625	-4.36116													92.5496	-18.0226			65.5905	-3.72206			79.1645	-6.0199
411.063									110.406	-52.3199			102.447	-5.63737			115.727	-5.20708													93.1199	-18.2499			65.8766	-4.31799			79.663	-5.40499
543.786									110.782	-52.11			102.906	-5.7285			116.499	-5.92699													93.7365	-18.3532			66.2915	-4.78966			80.1739	-4.60381
450.786									111.183	-51.7529			103.474	-5.43832			116.903	-6.49907													93.8666	-18.2928			66.9822	-5.07154			80.6975	-3.61129
538.624									111.771	-51.4103			103.958	-4.7443			117.382	-6.88823													94.4296	-18.0245			67.3877	-5.21834			81.1939	-2.51886
854.766									112.422	-51.3132			104.594	-3.80153			117.989	-7.14763													95.0753	-17.5179			68.0652	-5.26061			81.6129	-1.43016
986.574									112.862	-51.7093			104.907	-2.6758			118.199	-7.25442													95.5846	-16.7927			68.2892	-5.21128			82.2317	-0.5315
368.494									113.32	-52.7986			105.374	-1.51821			118.922	-7.21269													95.9839	-15.9713			68.8742	-4.95746			82.7352	0.01541
297.04									113.779	-54.6042			106.026	-0.42579			119.392	-6.95791													96.5705	-15.2459			69.2377	-4.41995			83.3383	0.14494
772.913									114.243	-56.9577			106.59	0.49027			119.826	-6.46894													96.9252	-14.8027			69.8424	-3.56246			83.6367	-0.12232
859.083									114.514	-59.5689			106.979	1.07891			120.255	-5.73335													97.6364	-14.7858			70.3695	-2.54298			84.0813	-0.58124
324.971									115.061	-62.1404			107.551	1.36011			120.755	-4.81628													98.1039	-15.2252			70.9317	-1.52459			84.5897	-0.97453
209.341									115.633	-64.4463			107.768	1.31691			121.403	-3.92288													98.5641	-15.9696			71.4154	-0.77536			85.1294	-1.0731
436.423									115.985	-66.3581			108.682	1.07364			121.954	-3.24197													98.8461	-16.7254			71.9491	-0.50448			85.4967	-0.7792
495.016									116.409	-67.8977			108.83	0.74456			122.325	-2.99082													99.2554	-17.2074			72.2763	-0.74387			86.0008	-0.16455
471.68									116.993	-69.1262			109.373	0.40422			122.942	-3.21018													99.8265	-17.2473			72.8907	-1.42994			86.6429	0.50868
189.855									117.521	-70.1092			109.752	0.09413			123.223	-3.83396													100.442	-16.8747			73.3643	-2.35312			87.215	0.98106
524.361									117.918	-70.9246			110.518	-0.26728			123.806	-4.69502													100.994	-16.2145			73.7599	-3.29244			87.7344	1.02737
131.52									118.398	-71.6081			111.063	-0.68931			124.186	-5.56654													101.45	-15.5289			74.1086	-4.04806			88.0027	0.58762
305.634									118.862	-72.1528			111.054	-1.17592			124.708	-6.30827													101.94	-14.9523			74.6058	-4.59389			88.5132	-0.18278
205.57									119.386	-72.5974			112.054	-1.6806			125.154	-6.82066													102.337	-14.5337			75.3391	-4.9184			88.9922	-1.1352
163.497									119.784	-73.0108			112.103	-2.15947			125.743	-7.11565													102.858	-14.2133			75.845	-5.11808			89.4653	-2.05082
274.423									120.465	-73.492			112.778	-2.61956			126.255	-7.28229													103.32	-13.9051			76.1538	-5.26822			89.9568	-2.84654
173.72									120.847	-74.0975			113.307	-3.19242			126.498	-7.35048													104.034	-13.4725			76.6274	-5.35744			90.545	-3.45073
418.629									121.291	-74.8673			113.854	-3.90383			127.281	-7.39725													104.394	-12.8783			77.1085	-5.34395			90.7603	-3.89294
115.375									121.815	-75.7638			114.391	-4.79002			127.585	-7.45171													104.558	-12.0805			77.5644	-5.23457			91.5586	-4.22043
116.779									122.237	-76.7024			114.495	-5.7105			128.205	-7.4905													105.485	-11.1517			78.2673	-5.04283			91.8769	-4.48351
696.21									122.659	-77.5552			115.199	-6.53716			128.656	-7.52373													105.852	-10.2639			78.7925	-4.83834			92.2653	-4.70435
181.748									123.309	-78.2801			115.593	-7.06745			128.911	-7.50757													106.383	-9.66934			78.8926	-4.70174			93.0433	-4.9261
303.064									123.635	-78.8869			116.032	-7.24341			129.643	-7.50441													107.02	-9.65768			79.6818	-4.66202			93.2727	-5.1453
383.033									124.204	-79.4275			116.745	-7.21939			130.229	-7.53564													107.395	-10.3059			80.2213	-4.66308			93.9828	-5.32933
581.05									124.616	-80.0488			117.234	-7.07779			130.464	-7.65773													107.739	-11.5551			80.5222	-4.58322			94.1606	-5.39184
411.067									125.201	-80.9176			117.567	-6.99882			131.19	-7.88387													108.428	-13.1215			81.0833	-4.278			94.8137	-5.28005
337.955									125.69	-82.1395			118.071	-6.9986			131.447	-8.1518													108.57	-14.6841			81.5251	-3.62568			95.3493	-4.95829
533.349									126.164	-83.824			118.588	-7.06583			131.994	-8.44946													109.115	-15.9738			81.9479	-2.64603			95.8181	-4.44268
1042.77									126.47	-85.9147			119.22	-7.11524			132.517	-8.71432													109.589	-16.8757			82.5863	-1.44165			96.2105	-3.86647
677.52									127.097	-88.2498			119.357	-7.10416			132.954	-8.95438													110.228	-17.5017			83.224	-0.20609			96.9172	-3.29147
588.027									127.477	-90.6225			120.063	-7.11393			133.642	-9.17279													110.887	-17.9511			83.6462	0.9122			97.2575	-2.77
617.222									127.798	-92.8764			120.64	-7.15768			133.863	-9.31983													111	-18.2861			84.0692	1.82755			97.8818	-2.32583
333.905									128.459	-94.8115			121.077	-7.33399			134.472	-9.35082													111.667	-18.467			84.6158	2.48671			98.2109	-1.86948
214.618									128.795	-96.4107			121.553	-7.6687			134.942	-9.1305													111.984	-18.3211			84.9879	2.97877			98.7591	-1.39315
226.634									129.344	-97.6353			121.934	-8.04274			135.291	-8.61355													112.559	-17.7908			85.467	3.32385			99.1472	-0.90852
348.722									129.962	-98.6189			122.493	-8.41792			135.943	-7.92078													113.1	-16.916			86.3086	3.51647			99.8181	-0.574
172.213									130.137	-99.4822			122.816	-8.7271			136.456	-7.23573													113.513	-15.8895			86.5616	3.53881			100.424	-0.51587
93.2124									130.727	-100.373			123.533	-9.01519			136.967	-6.85666													114.249	-15.0931			86.9674	3.40198			100.785	-0.83081
542.513									131.387	-101.448			124.025	-9.40905			137.606	-6.89619													114.777	-14.8281			87.4496	3.1538			101.156	-1.46414
269.449									131.936	-102.826			124.342	-9.93562			137.93	-7.34262													115.061	-15.2403			88.0684	2.81917			101.729	-2.28495
231.956									132.043	-104.553			125.086	-10.6414			138.363	-7.97898													115.634	-16.2531			88.5121	2.40463			102.088	-3.04588
188.193									132.684	-106.62			125.319	-11.377			138.643	-8.43728													115.962	-17.5634			88.8922	1.8391			102.597	-3.53031
403.156									132.993	-108.99			125.632	-11.9617			139.291	-8.52095													116.578	-18.833			89.5595	1.0575			103.174	-3.63061
370.992									133.859	-111.545			126.501	-12.279			139.843	-8.06353													116.725	-19.7471			89.9219	0.08169			103.618	-3.31283
427.32									134.043	-114.213			126.614	-12.2813			140.394	-7.13217													117.427	-20.1253			90.5099	-1.02732			104.049	-2.62876
253.505									134.375	-116.834			127.419	-12.0486			140.889	-5.90464													118.058	-19.9495			90.802	-2.06864			104.645	-1.71312
297.272									134.91	-119.317			127.952	-11.6687			141.139	-4.56217													118.438	-19.3277			91.1852	-2.83989			105.105	-0.71579
177.46									135.378	-121.577			128.166	-11.2713			142.01	-3.34002													118.863	-18.5121			91.8548	-3.24079			105.761	0.2678
121.657									136.013	-123.598			128.857	-10.8855			142.368	-2.36769													119.456	-17.7614			92.2956	-3.26608			106.106	1.11687
185.836									136.372	-125.388			129.215	-10.5105			142.844	-1.71819													119.956	-17.3742			92.8607	-3.06856			106.505	1.7382
464.716									136.762	-126.966			129.806	-10.19			143.536	-1.39862													120.517	-17.5712			93.3027	-2.81545			107.295	2.06029
221.247									137.229	-128.423			130.359	-9.87711			143.604	-1.33002													121.167	-18.3895			93.8071	-2.66126			107.505	2.05327
114.288									137.813	-129.847			130.712	-9.62046			144.353	-1.50734													121.302	-19.7078			94.4138	-2.68176			108.158	1.66231
390.181									138.214	-131.367			131.243	-9.47821			144.769	-1.88088													121.763	-21.1419			94.6322	-2.80793			108.667	0.92374
205.792									138.956	-133.061			131.724	-9.4035			145.32	-2.4721													122.175	-22.3622			95.375	-2.92454			109.083	-0.09746
427.805									139.018	-135.027			132.328	-9.412			145.972	-3.26011													122.782	-23.0985			95.6471	-2.90167			109.319	-1.28726
429.181									139.7	-137.214			132.724	-9.41708			146.088	-4.14625													123.255	-23.2426			96.1016	-2.70589			110.029	-2.55018
245.841									140.125	-139.508			133.163	-9.30159			146.7	-5.04162													123.838	-22.8543			96.8331	-2.36592			110.545	-3.80289
539.641									140.561	-141.731			133.701	-8.96453			147.093	-5.73611													124.196	-22.1163			97.2337	-2.02738			110.99	-4.97415
350.878									140.992	-143.615			134.028	-8.33818			147.611	-6.16452													124.811	-21.2343			97.7502	-1.81413			111.233	-5.96928
341.291									141.537	-144.966			134.766	-7.4887			148.313	-6.3376													125.322	-20.436			98.2392	-1.79917			112.007	-6.70355
236.671									141.793	-145.662			135.245	-6.59591			148.554	-6.28237													125.623	-19.8961			98.6898	-1.9698			112.299	-7.05384
351.737									142.502	-145.714			135.654	-5.89813			149.161	-6.14937													126.414	-19.7313			99.1312	-2.1928			112.796	-7.00126
469.603									142.987	-145.193			136.238	-5.61701			149.592	-5.95327													126.94	-20.0026			99.6903	-2.29473			113.261	-6.59283
255.679									143.368	-144.331			136.835	-5.87886			150.134	-5.73257													127.179	-20.605			100.087	-2.18655			113.958	-5.96009
473.287									144.127	-143.344			137.183	-6.64623			150.709	-5.46978													127.531	-21.3641			100.483	-1.78897			114.349	-5.32042
956.542									144.483	-142.542			137.505	-7.71391			150.964	-5.1083													128.185	-22.0408			101.314	-1.19264			114.93	-4.87276
648.638									144.825	-142.133			138.105	-8.85647			151.601	-4.67977													128.709	-22.4928			101.543	-0.5434			115.259	-4.71286
625.134									145.559	-142.242			138.521	-9.85382			152.072	-4.20736													129.154	-22.6539			102.193	0.02387			115.898	-4.82772
294.715									146.102	-142.863			139.077	-10.5029			152.587	-3.82027													129.513	-22.6133			102.675	0.34603			116.375	-5.09134
156.075									146.49	-143.874			139.494	-10.7492			153.195	-3.57701													130.19	-22.4754			103.043	0.36566			116.698	-5.38955
850.834									146.652	-145.061			139.945	-10.568			153.52	-3.47294													130.68	-22.3766			103.661	0.06171			117.221	-5.5233
473.185									147.267	-146.287			140.593	-10.0515			154.115	-3.46581													131.147	-22.3829			104.126	-0.4908			117.674	-5.46743
385.784									147.825	-147.526			140.956	-9.29115			154.494	-3.36429													131.633	-22.4286			104.532	-1.11501			118.356	-5.26907
545.182									148.427	-148.879			141.468	-8.42804			154.932	-3.03571													131.98	-22.4255			105.045	-1.61653			118.727	-5.04347
647.86									148.915	-150.546			142.163	-7.59549			155.457	-2.37815													132.534	-22.3343			105.418	-1.82701			119.314	-4.86406
415.372									149.199	-152.592			142.547	-6.91054			156.042	-1.4327													133.014	-22.1548			105.917	-1.71461			119.705	-4.82993
730.472									149.647	-155.029			142.863	-6.48837			156.657	-0.41398													133.64	-21.9657			106.522	-1.33419			120.182	-4.90563
580.282									150.158	-157.803			143.554	-6.3807			156.882	0.45238													134.102	-21.8089			106.977	-0.92891			120.752	-5.02787
142.131									150.604	-160.747			144.083	-6.59904			157.632	0.95735													134.655	-21.7448			107.689	-0.74019			121.076	-5.09447
388.445									151.07	-163.725			144.577	-7.12682			158.154	1.01181													134.849	-21.7717			108.011	-0.95047			121.768	-4.98768
546.984									151.625	-166.495			144.758	-7.85837			158.457	0.62191													135.407	-21.8374			108.343	-1.61581			122.158	-4.68443
247.874									151.929	-168.688			145.472	-8.65438			159.02	-0.07495													136.082	-21.9643			109.02	-2.65981			122.525	-4.18107
948.749									152.411	-169.724			145.941	-9.28175			159.292	-0.83955													136.604	-22.1896			109.407	-3.87385			123.083	-3.57214
370.749									152.728	-168.991			146.31	-9.60064			159.957	-1.47602													136.948	-22.5288			109.877	-5.06394			123.852	-2.99302
284.416									153.279	-166.029			146.842	-9.51924			160.487	-1.84259													137.511	-22.9668			110.272	-6.05665			124.166	-2.56166
141.893									153.812	-160.766			147.291	-9.01028			160.841	-1.89474													137.748	-23.3681			110.743	-6.81293			124.632	-2.24445
318.681									154.362	-153.702			147.78	-8.2292			161.257	-1.68676													138.523	-23.6361			111.324	-7.40327			125.163	-1.9657
147.842									155.329	-145.747			148.543	-7.39843			161.85	-1.32598													138.843	-23.6697			111.841	-7.91174			125.486	-1.55454
405.292									155.94	-137.988			148.874	-6.74936			162.652	-1.00769													139.319	-23.5014			112.346	-8.46697			126.106	-0.92359
693.342									156.499	-131.366			149.399	-6.43819			162.829	-0.81342													139.952	-23.2539			112.887	-8.98982			126.5	-0.14005
374.066									156.998	-126.473			149.765	-6.50649			163.267	-0.77437													140.388	-23.112			113.055	-9.33035			127.158	0.56856
429.339									157.443	-123.398			150.464	-6.94772			163.863	-0.87628													140.929	-23.1587			113.659	-9.27938			127.828	0.92419
548.385									157.831	-121.879			150.786	-7.62478			164.334	-1.05183													141.441	-23.3959			114.133	-8.69803			128.124	0.70697
0									158.336	-121.46			151.169	-8.37136			164.826	-1.27594													141.752	-23.6726			114.73	-7.64746			128.522	-0.10412
0									158.969	-121.739			151.836	-9.06967			165.298	-1.50022													142.332	-23.843			115.244	-6.36506			129.183	-1.26621
									159.303	-122.431			152.19	-9.60951			165.786	-1.72731													142.616	-23.7727			115.708	-5.18572			129.388	-2.46471
									159.718	-123.433			152.778	-9.92315			166.316	-1.90215													143.298	-23.4804			116.472	-4.43806			129.931	-3.38312
									160.257	-124.766			153.107	-10.0177			166.694	-1.98217													143.958	-23.0601			116.686	-4.3074			130.314	-3.78723
									160.964	-126.457			153.676	-9.90022			167.231	-1.91565													144.322	-22.6487			117.233	-4.8037			131.049	-3.68489
									161.256	-128.574			154.274	-9.67538			167.724	-1.64781													144.715	-22.3442			117.651	-5.72649			131.406	-3.23959
									161.592	-131.071			154.7	-9.45668			168.244	-1.20765													145.355	-22.1551			118.236	-6.78314			132.011	-2.73012
									162.076	-133.885			155.102	-9.35382			168.691	-0.61													145.632	-22.0423			118.584	-7.69415			132.499	-2.39248
									162.649	-136.836			155.753	-9.43379			169.235	0.08289													146.291	-21.9818			118.984	-8.17884			132.925	-2.33927
									163.106	-139.776			156.181	-9.76799			169.836	0.83479													146.758	-21.98			119.454	-8.1791			133.522	-2.5136
									163.495	-142.529			156.595	-10.3455			170.04	1.60551													147.224	-22.122			120.147	-7.78703			133.946	-2.7557
									163.791	-144.931			157.137	-11.127			170.742	2.31946													147.817	-22.433			120.693	-7.20719			134.194	-2.76743
									164.348	-146.95			157.553	-12.0959			171.286	2.91861													148.108	-22.9373			121.141	-6.656			134.805	-2.36633
									164.986	-148.561			158.082	-13.1969			171.788	3.35831													148.708	-23.6006			121.497	-6.25346			135.397	-1.48019
									165.347	-149.787			158.563	-14.4502			172.139	3.588													149.197	-24.3237			122.184	-5.98598			135.864	-0.30559
									165.975	-150.525			158.932	-15.7883			172.606	3.64411													149.555	-24.9726			122.511	-5.76112			136.415	0.91777
									166.173	-150.552			159.579	-17.1197			173.321	3.49633													150.12	-25.4509			122.863	-5.49553			136.98	1.87628
									166.815	-149.518			160	-18.3026			173.571	3.16026													150.577	-25.6681			123.648	-5.14243			137.409	2.4268
									167.175	-147.055			160.23	-19.1467			174.123	2.59666													151.092	-25.618			124.087	-4.77017			138.068	2.57736
									167.712	-142.996			160.886	-19.4809			174.737	1.78598													151.48	-25.3255			124.51	-4.45028			138.24	2.50694
									168.364	-137.535			161.349	-19.2556			175.083	0.78305													152.084	-24.8425			125.026	-4.21694			138.686	2.42475
									168.831	-131.241			161.85	-18.5564			175.573	-0.34444													152.753	-24.2094			125.628	-4.0215			139.271	2.5027
									169.742	-124.959			162.512	-17.5275			176.032	-1.43836													153.036	-23.4141			125.782	-3.88312			140.016	2.74356
									170.342	-119.495			162.815	-16.3661			176.355	-2.38446													153.336	-22.5269			126.511	-3.79614			140.275	3.06344
									170.8	-115.441			163.489	-15.2673			177.125	-3.11095													154.074	-21.6518			127.009	-3.85467			140.821	3.31044
									171.219	-112.976			163.925	-14.332			177.364	-3.59763													154.673	-20.9625			127.535	-4.12492			141.246	3.31893
									171.592	-111.881			164.295	-13.674			178.019	-3.94936													155.141	-20.6733			128.09	-4.5923			141.865	2.97359
									172.145	-111.812			164.947	-13.3386			178.49	-4.17089													155.701	-20.8467			128.369	-5.18723			142.289	2.24582
									172.618	-112.332			165.502	-13.3023			178.894	-4.3188													156.014	-21.4211			128.733	-5.70111			142.894	1.18473
									173.076	-113.215			165.93	-13.4858			179.373	-4.41438													156.377	-22.1613			129.297	-5.97254			143.114	0.0113
									173.578	-114.338			166.234	-13.6686			179.916	-4.42145													156.846	-22.876			130.083	-5.89248			143.618	-1.07988
									174.06	-115.68			166.759	-13.6639			180.47	-4.34061													157.519	-23.4916			130.225	-5.48881			144.113	-1.84353
									174.678	-117.301			167.345	-13.3684			180.83	-4.17373													157.993	-24.0476			130.877	-4.82098			144.627	-2.12846
									174.844	-119.19			167.656	-12.7491			181.268	-3.92071													158.441	-24.7297			131.398	-4.0773			145.116	-1.87411
									175.425	-121.326			168.435	-12.005			182.089	-3.62457													158.996	-25.7051			131.758	-3.38136			145.623	-1.17202
									175.983	-123.696			168.968	-11.2831			182.201	-3.29766													159.366	-26.9876			132.51	-2.79402			146.131	-0.13943
									176.357	-126.255			169.296	-10.7705			182.856	-2.99429													159.898	-28.4835			132.903	-2.36968			146.648	1.05761
									176.941	-128.946			169.75	-10.5455			183.457	-2.69985													160.183	-29.9783			133.31	-2.07913			147.094	2.2324
									177.164	-131.683			170.238	-10.6116			183.786	-2.44939													160.808	-31.2675			133.682	-1.89771			147.772	3.24285
									177.701	-134.327			170.91	-10.8965			184.32	-2.21495													161.286	-32.1549			134.391	-1.80848			148.086	3.97519
									178.239	-136.786			171.315	-11.3106			184.832	-1.97051													161.61	-32.6038			134.833	-1.78145			148.677	4.29507
									178.65	-139.026			171.593	-11.8189			185.259	-1.75335													162.222	-32.6312			135.436	-1.80058			149.203	4.22572
									179.07	-141.061			172.3	-12.3888			185.811	-1.58021													162.719	-32.382			135.747	-1.82936			149.62	3.82852
									179.613	-142.981			172.57	-12.9818			186.376	-1.52528													163.259	-32.0584			136.024	-1.85053			150.035	3.24901
									180.046	-144.938			173.343	-13.6418			186.732	-1.66451													163.796	-31.8471			136.874	-1.84354			150.549	2.65463
									180.601	-147.043			173.672	-14.3217			187.258	-1.93588													164.149	-31.8236			137.322	-1.87063			151.113	2.19042
									181.073	-149.366			174.201	-14.9821			187.925	-2.28884													164.814	-31.9878			137.775	-1.96546			151.325	1.90485
									181.341	-151.898			174.45	-15.5808			188.053	-2.59139													165.025	-32.1913			138.206	-2.14795			152.09	1.82989
									181.951	-154.519			175.01	-16.1154			188.617	-2.70025													165.729	-32.3803			138.633	-2.38532			152.671	1.92621
									182.408	-157.034			175.739	-16.6656			189.305	-2.59343													165.959	-32.4259			139.296	-2.68515			152.844	2.16522
									182.725	-159.223			176.153	-17.2835			189.583	-2.3411													166.737	-32.3378			139.473	-2.99788			153.503	2.44266
									183.32	-160.843			176.508	-18.0259			190.238	-2.13647													167.193	-32.1346			140.331	-3.35246			153.939	2.66693
									183.648	-161.669			177.077	-18.8475			190.796	-2.17078													167.629	-31.7754			140.642	-3.73646			154.483	2.72332
									184.24	-161.461			177.417	-19.5779			191.153	-2.56882													168.042	-31.2107			141.176	-4.07517			155.069	2.49665
									184.808	-159.954			177.957	-20.1098			191.668	-3.34478													168.542	-30.3956			141.606	-4.2449			155.624	2.0239
									185.168	-156.978			178.389	-20.2958			192.177	-4.38165													168.972	-29.3578			141.938	-4.07199			155.771	1.39127
									185.672	-152.479			178.985	-20.1667			192.473	-5.58041													169.813	-28.2655			142.49	-3.47077			156.292	0.82318
									186.105	-146.638			179.526	-19.7539			193.003	-6.75801													170	-27.2886			143.195	-2.55475			156.852	0.45196
									187.048	-139.97			179.887	-19.1309			193.561	-7.87397													170.833	-26.6575			143.547	-1.57182			157.41	0.3517
									187.67	-133.128			180.496	-18.3587			194.143	-8.8789													171.095	-26.3938			144.213	-0.7999			157.837	0.46519
									188.206	-126.853			180.849	-17.4388			194.402	-9.7056													171.524	-26.4853			144.702	-0.44983			158.375	0.58502
									188.661	-121.713			181.446	-16.4038			194.916	-10.3552													172.075	-26.7304			145.047	-0.67161			158.922	0.59308
									189.176	-118.002			182.012	-15.3392			195.435	-10.7588													172.543	-26.9678			145.53	-1.42176			159.212	0.40049
									189.827	-115.78			182.384	-14.3126			195.831	-10.8908													173.014	-27.1186			146.066	-2.65506			160.018	0.01216
									190.219	-114.91			183.073	-13.4341			196.657	-10.7172													173.509	-27.2376			146.431	-4.19093			160.184	-0.49085
									190.606	-115.097			183.398	-12.7562			196.776	-10.28													173.986	-27.4552			147.157	-5.84675			160.702	-0.97514
									191.146	-116.09			183.915	-12.3095			197.386	-9.55069													174.645	-27.8992			147.442	-7.36651			161.247	-1.39294
									191.557	-117.63			184.544	-12.0378			197.856	-8.59861													175.013	-28.5938			147.672	-8.50295			161.78	-1.66666
									192.186	-119.533			184.883	-11.8622			198.413	-7.55745													175.563	-29.4765			148.303	-8.99329			162.302	-1.77347
									192.418	-121.59			185.347	-11.7598			199.041	-6.59274													175.755	-30.3409			148.832	-8.81066			162.586	-1.69841
									192.992	-123.663			185.905	-11.7091			199.397	-5.86425													176.293	-31.0707			149.429	-8.0458			163.173	-1.46125
									193.473	-125.561			186.357	-11.7999			199.975	-5.48601													176.906	-31.5546			149.956	-6.89697			163.745	-1.10377
									193.966	-127.077			186.946	-12.1253			200.354	-5.44776													177.499	-31.8301			150.243	-5.6074			164.219	-0.61997
									194.225	-127.975			187.431	-12.7515			201.1	-5.61508													177.908	-32.0062			151.002	-4.3656			164.666	-0.08205
									194.892	-128.101			187.887	-13.6821			201.114	-5.82192													178.257	-32.1397			151.384	-3.29211			165.223	0.51438
									195.281	-127.425			188.217	-14.7456			201.806	-5.85671													178.901	-32.2435			151.95	-2.45128			165.57	1.07997
									195.799	-126.104			188.742	-15.7436			202.441	-5.69638													179.22	-32.3198			152.22	-1.87009			166.203	1.5767
									196.414	-124.426			189.288	-16.3955			202.81	-5.29021													179.886	-32.3314			153.016	-1.58765			166.712	1.9391
									197.074	-122.775			189.637	-16.5287			203.324	-4.7589													180.383	-32.3231			153.432	-1.62312			167.242	2.13534
									197.406	-121.466			190.167	-16.1273			203.808	-4.16557													180.572	-32.3113			153.797	-1.95476			167.689	2.18279
									197.888	-120.784			190.673	-15.3065			204.383	-3.61798													181.434	-32.3846			154.326	-2.50681			167.936	2.12603
									198.366	-120.807			191.287	-14.3562			204.806	-3.20518													181.907	-32.5208			154.839	-3.12535			168.656	1.98883
									199.046	-121.561			191.85	-13.5226			205.291	-2.9758													182.123	-32.6901			155.296	-3.65487			169.166	1.80398
									199.344	-122.866			192.298	-12.9745			205.837	-2.99913													182.676	-32.7985			155.633	-4.00028			169.651	1.5218
									199.8	-124.523			192.776	-12.7331			206.385	-3.22629													183.258	-32.7851			156.294	-4.09965			169.983	1.10271
									200.249	-126.194			193.014	-12.7031			206.604	-3.69077													183.684	-32.6941			156.708	-4.01474			170.613	0.55898
									200.684	-127.614			193.759	-12.7664			207.42	-4.34031													184.25	-32.5582			157.207	-3.85457			171.058	-0.09373
									201.142	-128.604			194.151	-12.8373			207.561	-5.08135													184.684	-32.4918			157.901	-3.70137			171.502	-0.79758
									201.699	-129.214			194.638	-12.8957			208.33	-5.86212													185.289	-32.5427			158.232	-3.56456			171.905	-1.4647
									202.11	-129.63			195.386	-12.9622			208.65	-6.51269													185.592	-32.6805			158.581	-3.37069			172.559	-2.10957
									202.882	-130.154			195.466	-13.0527			209.151	-6.90578													186.235	-32.8793			159.17	-3.04175			172.861	-2.70381
									203.11	-131.071			196.113	-13.1899			209.619	-6.89001													186.531	-33.0342			159.653	-2.50955			173.538	-3.29817
									203.77	-132.514			196.625	-13.3582			209.975	-6.43854													187.093	-33.0854			160.214	-1.83391			173.908	-3.87205
									204.065	-134.4			197.154	-13.5356			210.652	-5.6583													187.738	-32.9933			160.711	-1.1516			174.364	-4.36899
									204.513	-136.563			197.602	-13.7415			211.205	-4.79152													188.052	-32.771			161.259	-0.66128			174.898	-4.69902
									204.919	-138.84			198.083	-13.9242			211.677	-4.15159													188.613	-32.4012			161.563	-0.46405			175.352	-4.76868
									205.573	-141.045			198.532	-14.0845			212.302	-4.04189													189.076	-31.9302			162.353	-0.61945			175.687	-4.52723
									205.905	-143.144			198.942	-14.1751			212.507	-4.56495													189.503	-31.3922			162.623	-1.07429			176.519	-4.02692
									206.368	-145.116			199.588	-14.2125			213.246	-5.72908													190.139	-30.9004			163.084	-1.68906			176.698	-3.4258
									207.011	-146.933			200.128	-14.2028			213.528	-7.26444													190.707	-30.5288			163.49	-2.31104			177.43	-2.89434
									207.298	-148.544			200.45	-14.13			214.004	-8.92409													191.083	-30.3625			164.155	-2.83429			177.953	-2.57563
									207.697	-149.823			200.94	-14.035			214.404	-10.4244													191.419	-30.3594			164.589	-3.14671			178.346	-2.52444
									208.259	-150.77			201.578	-13.8582			214.897	-11.5529													192.184	-30.5148			165.044	-3.19035			178.798	-2.70062
									208.889	-151.402			201.878	-13.5506			215.464	-12.2595													192.468	-30.754			165.435	-2.93421			179.169	-3.01917
									209.082	-151.854			202.516	-13.0846			215.904	-12.5448													193.025	-31.0038			166.045	-2.42205			179.815	-3.38407
									209.901	-152.315			203.003	-12.4632			216.476	-12.4898													193.445	-31.2496			166.515	-1.74952			180.321	-3.72706
									210.27	-152.905			203.428	-11.7156			216.896	-12.1561													194.083	-31.4389			167.07	-1.14545			180.822	-3.97827
									210.741	-153.646			203.842	-10.9506			217.252	-11.5686													194.459	-31.5472			167.525	-0.7719			181.109	-4.08497
									211.12	-154.522			204.578	-10.3209			218.058	-10.7702													194.913	-31.5501			168.154	-0.80253			181.75	-3.90735
									211.605	-155.422			205.068	-9.95447			218.364	-9.77123													195.362	-31.3727			168.528	-1.23136			182.09	-3.39822
									212.195	-156.268			205.421	-9.93907			218.788	-8.68181													196.072	-31.0029			168.966	-1.93104			182.798	-2.54436
									212.596	-157.081			205.936	-10.268			219.451	-7.64423													196.38	-30.4461			169.393	-2.67903			183.161	-1.44053
									213.073	-157.965			206.477	-10.8073			219.954	-6.80048													196.898	-29.7936			169.88	-3.23729			183.685	-0.24536
									213.685	-159.055			206.848	-11.3746			220.538	-6.23416													197.42	-29.13			170.353	-3.44706			184.316	0.85061
									213.977	-160.417			207.256	-11.8447			220.87	-5.92156													197.918	-28.6185			170.969	-3.27021			184.786	1.68925
									214.632	-162.14			207.868	-12.181			221.379	-5.77594													198.574	-28.3538			171.374	-2.71297			185.259	2.26042
									215.067	-164.144			208.329	-12.4837			221.752	-5.56043													198.963	-28.3996			171.923	-1.85026			185.657	2.58136
									215.28	-166.343			208.867	-12.9484			222.352	-5.1612													199.277	-28.6678			172.307	-0.79278			186.12	2.71128
									215.913	-168.672			209.441	-13.7521			222.89	-4.55491													199.93	-29.0726			172.92	0.3679			186.746	2.64586
									216.378	-171.097			209.807	-14.8954			223.37	-3.80183													200.263	-29.4992			173.531	1.58582			187.206	2.36342
									216.911	-173.576			210.208	-16.2618			223.77	-3.122													200.853	-29.8947			173.843	2.77834			187.65	1.84387
									217.34	-176.067			210.745	-17.5857			224.382	-2.75997													201.357	-30.3024			174.416	3.89674			188.274	1.20687
									217.668	-178.419			211.075	-18.5214			225.016	-2.87276													201.842	-30.7698			174.924	4.8783			188.613	0.60063
									218.22	-180.379			211.604	-18.866			225.465	-3.52367													202.3	-31.2813			175.357	5.64808			188.87	0.20435
									218.621	-181.591			212.106	-18.5283			225.546	-4.60468													202.833	-31.7377			175.967	6.10303			189.529	0.14423
									219.06	-181.741			212.69	-17.6521			226.387	-5.95159													203.145	-31.9944			176.572	6.17072			190.053	0.39033
									219.673	-180.608			213.161	-16.4972			226.672	-7.29618													203.725	-31.9342			176.811	5.84582			190.668	0.79166
									220.032	-178.117			213.679	-15.3953			227.169	-8.46884													204.078	-31.5554			177.29	5.19295			191.239	1.15506
									220.557	-174.433			214.351	-14.6632			227.686	-9.35836													204.709	-31.0203			177.935	4.32621			191.467	1.38262
									221.403	-169.847			214.639	-14.5005			228.131	-9.94052													205.545	-30.5363			178.297	3.32941			191.898	1.44704
									221.797	-164.819			215.089	-15.0174			228.598	-10.2646													205.68	-30.3031			178.737	2.30834			192.593	1.38258
									222.359	-159.845			215.862	-16.1651			229.183	-10.3493													206.155	-30.406			179.23	1.3017			193.1	1.25068
									222.898	-155.347			215.979	-17.7375			229.668	-10.2076													206.671	-30.8292			179.802	0.2764			193.47	1.06769
									223.493	-151.678			216.613	-19.4583			230.154	-9.75624													207.186	-31.4555			180.283	-0.77501			193.954	0.87197
									224.172	-149.001			216.982	-20.9531			230.394	-8.90978													207.711	-32.2421			180.597	-1.83843			194.504	0.70312
									224.415	-147.327			217.372	-21.9009			231.112	-7.69601													208.068	-33.1006			181.187	-2.83772			194.976	0.6613
									224.893	-146.584			217.92	-22.0658			231.643	-6.14803													208.614	-34.0602			181.63	-3.62003			195.335	0.76267
									225.391	-146.607			218.394	-21.4239			232.164	-4.46212													209.121	-35.0497			182.245	-4.08844			195.997	0.99092
									226.024	-147.305			219.014	-20.1596			232.72	-2.84609													209.51	-36.1163			182.371	-4.15801			196.36	1.25839
									226.467	-148.62			219.461	-18.5947			233.07	-1.48027													210.066	-37.2615			182.933	-3.87341			196.868	1.34152
									226.776	-150.436			220.037	-17.165			233.805	-0.48376													210.495	-38.4638			183.847	-3.40721			197.686	1.05564
									227.383	-152.648			220.646	-16.2254			234.082	0.09719													210.885	-39.7129			184.154	-2.96559			197.902	0.35279
									227.788	-155.02			221.047	-15.9549			234.626	0.21363													211.678	-40.9215			184.582	-2.70954			198.307	-0.64258
									228.174	-157.32			221.562	-16.3945			235.167	-0.13137													211.832	-41.9438			185.075	-2.70246			198.793	-1.66835
									228.694	-159.245			221.892	-17.3502			235.641	-0.92286													212.397	-42.5791			185.504	-2.91155			199.38	-2.40729
									229.029	-160.589			222.401	-18.5633			236.144	-2.13295													212.559	-42.7137			186.077	-3.27887			199.598	-2.64834
									229.643	-161.197			222.872	-19.7548			236.549	-3.57629													213.515	-42.4243			186.469	-3.70457			200.105	-2.41025
									230.174	-161.005			223.351	-20.7299			236.972	-5.05969													213.913	-41.8655			187.135	-4.11793			200.922	-1.94809
									230.593	-159.985			223.833	-21.4592			237.389	-6.35617													214.465	-41.3067			187.484	-4.37671			201.424	-1.55341
									231.088	-158.168			224.248	-21.97			237.88	-7.30688													214.844	-40.9383			187.874	-4.40673			201.892	-1.48314
									231.526	-155.679			224.915	-22.3897			238.554	-7.87069													215.443	-40.8051			188.393	-4.08565			202.257	-1.74404
									232.259	-152.786			225.352	-22.7482			238.803	-8.05426													215.865	-40.8192			188.987	-3.3459			202.665	-2.08396
									232.63	-149.854			225.81	-23.0368			239.443	-7.98911													216.143	-40.8394			189.476	-2.23854			203.09	-2.22034
									233.459	-147.254			226.229	-23.1838			239.954	-7.73424													216.831	-40.7488			189.963	-0.87018			203.634	-1.96986
									233.684	-145.377			226.586	-23.0755			240.333	-7.31465													217.41	-40.5638			190.469	0.5964			204.225	-1.28584
									234.367	-144.42			227.247	-22.7016			240.97	-6.7518													217.704	-40.2985			191.019	1.99629			204.745	-0.29878
									234.744	-144.445			227.886	-22.1015			241.313	-5.96445													218.442	-40.0957			191.466	3.13731			205.221	0.71843
									235.257	-145.291			228.222	-21.3395			241.862	-4.96373													218.75	-39.9235			192.069	3.78586			205.813	1.49962
									235.671	-146.677			228.784	-20.5115			242.319	-3.83455													219.261	-39.8086			192.445	3.8141			206.154	1.94988
									236.143	-148.299			229.079	-19.6621			242.927	-2.783													219.698	-39.6884			193.142	3.12979			206.699	2.07663
									236.6	-149.85			229.861	-18.7948			243.525	-2.07433													220.211	-39.612			193.47	1.78226			207.255	2.0223
									236.854	-151.19			230.256	-17.9071			243.847	-1.91088													220.91	-39.5872			193.872	0.01797			207.774	1.99594
									237.686	-152.255			230.683	-16.9895			244.487	-2.44153													221.195	-39.6694			194.329	-1.91275			207.899	2.2087
									238.071	-153.099			231.291	-16.0445			245.04	-3.5467													221.647	-39.8776			194.655	-3.6549			208.515	2.73523
									238.592	-153.653			231.695	-15.1351			245.087	-4.93189													222.337	-40.1535			195.351	-4.98356			209.214	3.48287
									238.959	-153.802			232.147	-14.3917			245.776	-6.22608													222.58	-40.4192			195.838	-5.73501			209.833	4.27939
									239.419	-153.289			232.886	-13.9103			246.199	-7.04419													223.194	-40.5962			196.115	-5.80986			210.113	4.8635
									239.9	-151.92			233.283	-13.8046			246.678	-7.23018													223.522	-40.597			196.721	-5.24878			210.647	5.05713
									240.292	-149.699			233.679	-14.126			247.128	-6.79251													224.307	-40.4555			197.183	-4.20652			211.153	4.81252
									241.087	-146.848			234.294	-14.7933			247.723	-5.9705													224.572	-40.1593			197.644	-2.9787			211.609	4.16899
									241.679	-143.842			234.559	-15.6962			248.408	-5.07499													225.163	-39.7355			198.587	-1.88099			212.044	3.2509
									242.192	-141.154			235.067	-16.6601			248.765	-4.31805													225.548	-39.2331			198.651	-1.21862			212.625	2.21782
									242.644	-139.18			235.697	-17.5779			249.254	-3.87571													226.159	-38.6501			199.472	-1.09265			213.04	1.21626
									243.096	-138.026			236.11	-18.426			249.702	-3.6868													226.678	-38.0668			199.725	-1.37737			213.318	0.36477
									243.604	-137.667			236.432	-19.2092			250.12	-3.63348													226.994	-37.5763			200.038	-1.85461			214.077	-0.20916
									244.048	-137.975			237.161	-20.0401			250.739	-3.66772													227.672	-37.23			200.658	-2.22843			214.456	-0.42477
									244.603	-138.85			237.548	-20.9518			251.11	-3.7785													228.265	-37.1053			201.2	-2.38133			214.933	-0.2472
									244.916	-140.261			238.012	-21.8745			251.76	-4.02924													228.452	-37.1606			201.631	-2.34064			215.383	0.28089
									245.665	-142.146			238.498	-22.6788			252.21	-4.47624													229.066	-37.3849			202.206	-2.21178			215.92	1.1079
									245.983	-144.451			238.939	-23.1874			252.557	-5.14234													229.624	-37.6616			202.763	-2.13484			216.477	2.10718
									246.401	-146.967			239.304	-23.1909			253.282	-5.93516													229.953	-37.9241			203.106	-2.1777			217.072	3.12716
									246.785	-149.438			239.85	-22.629			253.408	-6.70388													230.549	-38.106			203.581	-2.22136			217.354	4.00746
									247.249	-151.613			240.432	-21.5362			254.017	-7.31068													231.033	-38.2101			204.143	-2.16554			217.923	4.62129
									247.74	-153.354			241.173	-20.0657			254.533	-7.64828													231.465	-38.2673			204.499	-1.86863			218.551	4.85552
									248.274	-154.635			241.314	-18.4307			255.136	-7.73188													231.958	-38.3568			205.168	-1.29648			219.03	4.62318
									248.825	-155.558			241.9	-16.9032			255.457	-7.61825													232.457	-38.5642			205.467	-0.50524			219.381	4.00471
									249.128	-156.262			242.545	-15.6949			255.956	-7.38998													233.136	-38.9706			206.098	0.31816			219.802	3.08193
									249.775	-156.865			243.101	-14.9731			256.581	-7.16122													233.437	-39.5321			206.743	0.95592			220.434	1.99803
									250.171	-157.5			243.503	-14.8319			257.016	-6.94601													233.812	-40.2225			207.154	1.21823			220.834	0.90004
									250.667	-158.224			243.992	-15.223			257.553	-6.76349													234.38	-40.9428			207.552	1.08124			221.243	-0.03065
									251.143	-159.116			244.357	-15.9737			257.891	-6.59493													234.892	-41.5712			208.021	0.63379			221.756	-0.66566
									251.69	-160.238			244.894	-16.8663			258.392	-6.38311													235.394	-42.0876			208.669	0.05584			222.318	-0.8798
									252.079	-161.608			245.3	-17.7091			259.069	-6.16458													235.84	-42.4363			208.883	-0.45958			222.727	-0.65112
									252.641	-163.194			245.894	-18.3555			259.396	-5.97411													236.206	-42.6043			209.3	-0.77605			223.064	-0.01737
									252.984	-164.896			246.349	-18.6975			259.994	-5.89333													236.933	-42.5864			210.151	-0.87015			223.819	0.87888
									253.489	-166.557			246.733	-18.755			260.469	-5.97018													237.184	-42.3788			210.555	-0.77224			224.376	1.87469
									253.976	-167.919			247.382	-18.4972			260.837	-6.26364													237.894	-41.8185			210.948	-0.56959			224.817	2.77467
									254.453	-168.722			247.766	-17.9995			261.495	-6.77551													238.366	-40.6007			211.313	-0.31039			225.147	3.39522
									254.863	-168.674			248.212	-17.3581			261.843	-7.4451													238.68	-38.3155			212.012	-0.01043			225.811	3.69935
									255.363	-167.508			248.817	-16.7375			262.369	-8.26847													239.241	-34.594			212.449	0.24031			226.245	3.66678
									255.804	-165.106			249.459	-16.2949			262.803	-9.16197													239.525	-29.3174			212.964	0.36616			226.765	3.32046
									256.421	-161.506			249.805	-16.172			263.315	-10.0946													240.289	-22.7997			213.445	0.30071			227.241	2.75232
									257.022	-156.962			250.286	-16.355			263.813	-11.0071													241.193	-15.7675			213.898	0.11412			227.708	2.09389
									257.608	-151.91			250.743	-16.7564			264.241	-11.7849													242.037	-9.14871			214.484	-0.06602			227.967	1.44719
									258.075	-146.823			251.087	-17.2656			264.745	-12.3735													242.243	-3.72993			214.83	-0.08105			228.668	0.85905
									258.741	-142.227			251.89	-17.7831			265.155	-12.6622													242.846	0.09733			215.219	0.31231			229.274	0.33543
									259.36	-138.488			252.138	-18.2542			265.643	-12.5792													243.196	2.34219			215.708	1.1255			229.466	-0.15905
									259.678	-135.853			252.639	-18.6622			266.337	-12.1469													243.725	3.39159			216.497	2.21423			230.125	-0.6718
									260.33	-134.348			253.21	-18.9954			266.557	-11.3737													244.246	3.76471			216.93	3.29583			230.663	-1.23409
									260.692	-133.903			253.744	-19.2386			267.227	-10.4116													244.69	3.89003			217.47	4.1046			231.008	-1.71963
									261.264	-134.318			253.992	-19.378			267.704	-9.43414													245.148	4.16413			217.836	4.46201			231.466	-2.0305
									261.654	-135.337			254.557	-19.3764			268.219	-8.63696													245.637	4.75238			218.386	4.30404			232.009	-2.0624
									262.068	-136.699			255.264	-19.3071			268.863	-8.14682													246.064	5.67781			218.933	3.75453			232.457	-1.75745
									262.682	-138.211			255.596	-19.2224			269.168	-7.98145													246.781	6.79538			219.108	2.95922			233.02	-1.1388
									263	-139.731			256.019	-19.2097			269.656	-8.0941													247.206	7.91339			219.897	2.1037			233.465	-0.33915
									263.566	-141.211			256.677	-19.3671			270.178	-8.36486													247.708	8.69351			220.283	1.31927			234.075	0.47653
									263.928	-142.625			257.03	-19.7264			270.484	-8.72876													248.242	8.96451			220.682	0.65746			234.565	1.16807
									264.644	-143.974			257.572	-20.3339			271.229	-9.17423													248.861	8.65628			221.174	0.13992			234.858	1.61485
									264.973	-145.255			258.088	-21.1661			271.695	-9.67816													249.006	7.84777			221.679	-0.25499			235.646	1.81908
									265.306	-146.409			258.445	-22.1399			272.12	-10.3007													249.604	6.7518			222.351	-0.60311			236.058	1.85571
									265.875	-147.417			259.075	-23.1019			272.498	-11.008													250.124	5.61043			222.566	-0.93489			236.345	1.83649
									266.481	-148.238			259.333	-23.9112			272.974	-11.7782													250.583	4.68978			223.234	-1.2452			236.83	1.82903
									266.874	-148.845			259.901	-24.4317			273.599	-12.549													250.9	4.21585			223.629	-1.43325			237.423	1.85557
									267.341	-149.191			260.376	-24.5935			274.016	-13.245													251.632	4.28749			224.082	-1.35393			238.094	1.82987
									267.817	-149.154			260.937	-24.4447			274.539	-13.8551													251.875	4.97466			224.627	-0.92694			238.447	1.65114
									268.347	-148.645			261.385	-24.14			274.892	-14.3628													252.459	6.1269			224.975	-0.0853			238.833	1.24917
									268.695	-147.633			261.911	-23.8468			275.317	-14.7929													253.123	7.51916			225.674	1.1083			239.39	0.57809
									269.285	-146.248			262.436	-23.7703			276.02	-15.2455													253.596	8.82757			226.192	2.53308			239.883	-0.24389
									269.914	-144.708			262.892	-24.0373			276.51	-15.7583													254.159	9.82443			226.661	4.06531			240.311	-1.17244
									270.436	-143.357			263.394	-24.6674			277.002	-16.3814													254.524	10.2985			227.145	5.60374			240.874	-1.99317
									270.936	-142.484			263.869	-25.5952			277.254	-17.0395													255.061	10.2823			227.603	7.06787			241.206	-2.59725
									271.402	-142.223			264.318	-26.5991			277.777	-17.6592													255.608	9.87821			228.16	8.37681			241.727	-2.8452
									271.803	-142.513			264.666	-27.5302			278.364	-18.1368													255.846	9.29428			228.672	9.43084			242.198	-2.73467
									272.271	-143.241			265.228	-28.1677			278.81	-18.4229													256.547	8.69021			229.244	10.0955			242.719	-2.28963
									272.818	-144.26			265.711	-28.4399			279.347	-18.5301													256.875	8.21692			229.716	10.3048			243.427	-1.67556
									273.223	-145.476			266.258	-28.3316			279.806	-18.4924													257.5	7.93206			230.143	10.0735			243.538	-1.09295
									273.727	-146.839			266.736	-27.9225			280.235	-18.3386													257.854	7.84673			230.597	9.50685			244.453	-0.73098
									274.293	-148.379			267.187	-27.3445			280.846	-18.0535													258.5	7.94488			231.083	8.75423			244.646	-0.70833
									274.694	-150.056			267.693	-26.7128			281.152	-17.5932													258.797	8.16863			231.619	7.9876			245.412	-0.99319
									275.111	-151.791			268.185	-26.1867			281.856	-16.9626													259.49	8.45002			231.848	7.2745			245.543	-1.47563
									275.506	-153.47			268.925	-25.8515			282.194	-16.195													259.818	8.69157			232.638	6.60155			246.272	-1.9515
									276.152	-154.997			269.064	-25.7273			282.784	-15.3651													260.443	8.79412			233.101	5.87394			246.457	-2.25196
									276.529	-156.3			269.767	-25.7778			283.266	-14.5415													260.961	8.74205			233.434	5.01364			247.242	-2.26636
									276.963	-157.464			270.116	-25.859			283.856	-13.7632													261.287	8.4902			233.991	3.9394			247.559	-2.01654
									277.475	-158.585			270.625	-25.881			284.246	-13.0852													261.865	8.14158			234.411	2.67975			248.142	-1.64502
									278.105	-159.735			271.139	-25.7427			284.631	-12.5135													262.327	7.75711			235.035	1.30115			248.745	-1.25728
									278.452	-160.983			271.535	-25.5174			285.262	-12.1361													262.765	7.47474			235.237	-0.15165			249.065	-0.9781
									278.963	-162.258			272.258	-25.3071			285.86	-11.99													263.278	7.33444			235.869	-1.50666			249.676	-0.75961
									279.355	-163.355			272.62	-25.2066			286.308	-12.0902													263.768	7.40304			236.341	-2.64601			250.088	-0.5935
									279.799	-164.021			273.161	-25.2618			286.646	-12.4313													264.319	7.62504			236.806	-3.43607			250.501	-0.35782
									280.247	-164.005			273.675	-25.3917			287.149	-12.8981													264.668	7.9815			237.181	-3.82351			250.998	-0.08674
									281.004	-163.196			273.865	-25.4095			287.636	-13.4628													265.356	8.40104			237.759	-3.80535			251.635	0.15645
									281.203	-161.591			274.64	-25.1902			288.193	-14.033													265.711	8.84033			238.118	-3.48538			252.224	0.19337
									281.705	-159.411			274.851	-24.6476			288.599	-14.5875													266.299	9.21349			238.86	-3.10106			252.516	-0.07257
									282.566	-157.01			275.782	-23.8716			289.3	-15.0855													266.642	9.42659			239.524	-2.82498			252.965	-0.70787
									283.024	-154.758			276.011	-22.9728			289.428	-15.4508													267.296	9.34713			239.494	-2.8348			253.592	-1.62148
									283.459	-152.96			276.499	-22.1536			290.057	-15.6146													267.713	8.86704			240.321	-3.07684			254.069	-2.63773
									283.947	-151.771			277.186	-21.5641			290.529	-15.5341													268.353	7.9482			240.753	-3.46336			254.302	-3.58579
									284.407	-151.185			277.539	-21.2288			291.041	-15.2044													268.682	6.68358			241.133	-3.77338			254.865	-4.23271
									284.958	-151.098			278.05	-21.18			291.718	-14.7217													269.056	5.33414			241.662	-3.81845			255.456	-4.44055
									285.335	-151.374			278.474	-21.353			291.913	-14.1529													269.524	4.20251			242.04	-3.47262			255.888	-4.17459
									285.925	-151.882			279.062	-21.6849			292.611	-13.557													270.061	3.51208			242.694	-2.74273			256.394	-3.45732
									286.387	-152.471			279.527	-22.127			293.102	-12.9146													270.398	3.40357			243.079	-1.80485			256.854	-2.39769
									286.77	-153.127			279.824	-22.5647			293.439	-12.2063													271.144	3.78308			243.842	-0.93319			257.321	-1.20695
									287.339	-153.856			280.639	-22.9673			294.009	-11.4459													271.58	4.499			244.073	-0.37376			258.025	-0.18419
									287.711	-154.695			280.851	-23.2378			294.577	-10.6688													272.108	5.32686			244.799	-0.27823			258.559	0.4148
									288.348	-155.762			281.285	-23.4597			295.018	-10.0339													272.584	6.15791			245.222	-0.67659			258.851	0.44158
									288.833	-157.148			281.994	-23.6995			295.673	-9.5883													272.928	6.92562			245.629	-1.3491			259.474	-0.07145
									289.286	-158.854			282.41	-24.0744			295.944	-9.43547													273.635	7.65006			245.93	-2.08517			259.961	-0.96611
									289.596	-160.75			283.027	-24.7075			296.587	-9.55217													274.081	8.35445			246.426	-2.66614			260.166	-1.91829
									290.085	-162.643			283.322	-25.6135			296.893	-9.86542													274.468	9.07818			247.205	-3.01673			260.69	-2.60514
									290.668	-164.271			283.786	-26.7458			297.503	-10.3911													275.079	9.77516			247.53	-3.17356			261.338	-2.82153
									291.012	-165.354			284.245	-27.9501			297.939	-11.0285													275.495	10.4234			248.058	-3.14159			261.809	-2.49146
									291.53	-165.706			284.772	-29.0894			298.512	-11.7637													276.081	10.8748			248.597	-2.93485			262.192	-1.64032
									292.012	-165.27			285.386	-30.0789			298.95	-12.5375													276.509	11.0239			248.842	-2.49184			262.783	-0.42069
									292.476	-164.129			285.53	-30.7964			299.213	-13.1794													277.094	10.8065			249.433	-1.7713			263.287	1.00089
									293.032	-162.524			286.239	-31.2175			300.032	-13.551													277.59	10.2323			250.123	-0.75706			263.872	2.37767
									293.598	-160.752			286.718	-31.2824			300.158	-13.5453													277.927	9.42219			250.4	0.44268			264.255	3.49601
									294.34	-159.164			287.16	-30.9511			300.815	-13.1416													278.319	8.54766			251.153	1.6913			264.867	4.18415
									294.528	-158.009			287.679	-30.2463			301.439	-12.4499													279.004	7.79185			251.533	2.82002			265.433	4.41503
									295.005	-157.446			288.065	-29.1649			301.699	-11.6351													279.252	7.28344			251.923	3.7146			265.819	4.21165
									295.631	-157.496			288.729	-27.8346			302.595	-10.938													280.006	7.06554			252.58	4.36089			266.106	3.72101
									296.161	-158.056			289.234	-26.3992			302.837	-10.5094													280.392	7.10712			253.153	4.71665			266.717	3.06799
									296.623	-158.946			289.729	-24.9871			303.159	-10.4633													280.725	7.32562			253.371	4.82323			267.208	2.33291
									296.897	-159.887			290.239	-23.7502			303.976	-10.7309													281.406	7.6341			253.986	4.77167			267.857	1.50699
									297.353	-160.643			290.625	-22.699			304.338	-11.2125													281.888	7.88776			254.532	4.56705			268.089	0.60858
									297.99	-161.03			291.332	-21.8897			304.793	-11.8117													282.37	8.02067			254.91	4.20723			268.747	-0.32314
									298.416	-160.966			291.733	-21.2301			305.07	-12.3252													282.938	8.00897			255.451	3.66926			269.01	-1.18486
									298.977	-160.505			292.046	-20.6646			305.704	-12.7171													283.234	7.91722			255.905	2.85888			269.602	-1.89444
									299.478	-159.669			292.778	-20.1301			306.319	-12.95													283.733	7.84177			256.442	1.75501			270.013	-2.3814
									299.956	-158.528			293.187	-19.593			306.77	-13.0205													284.36	7.89789			257.032	0.41724			270.658	-2.62523
									300.358	-157.113			293.587	-19.1182			307.24	-12.977													284.708	8.07194			257.245	-1.04767			271.028	-2.685
									300.879	-155.431			294.311	-18.7618			307.435	-12.7841													285.244	8.37179			257.619	-2.43744			271.567	-2.67043
									301.579	-153.578			294.57	-18.6033			308.264	-12.4805													285.899	8.71696			258.33	-3.52982			271.985	-2.67087
									301.937	-151.734			295.279	-18.6892			308.787	-12.1429													286.234	9.02648			258.776	-4.26951			272.541	-2.7729
									302.473	-150.12			295.603	-18.9497			309.062	-11.8265													286.767	9.25302			259.196	-4.56683			273.075	-2.98084
									303.114	-148.994			296.184	-19.296			309.726	-11.6608													287.144	9.35443			259.688	-4.43672			273.569	-3.28881
									303.481	-148.509			296.493	-19.5175			310.167	-11.6868													287.748	9.29958			260.227	-3.939			273.947	-3.52518
									304.002	-148.822			297.007	-19.4994			310.647	-11.9503													288.334	9.05772			260.622	-3.18796			274.343	-3.56351
									304.513	-149.995			297.621	-19.2297			311.103	-12.3955													288.775	8.62212			261.328	-2.26392			274.919	-3.2646
									304.886	-151.962			298.041	-18.7582			311.6	-12.9584													289.057	8.03459			261.711	-1.29553			275.442	-2.61843
									305.461	-154.632			298.604	-18.2432			312.066	-13.5638													289.634	7.36456			262.164	-0.32055			275.965	-1.73172
									305.887	-157.781			299.144	-17.8569			312.527	-14.1275													290.131	6.65438			262.889	0.59255			276.46	-0.82268
									306.146	-161.129			299.52	-17.683			313.047	-14.6758													290.714	5.96532			263.026	1.38663			276.996	-0.08259
									306.729	-164.397			300.12	-17.7867			313.58	-15.1221													291.08	5.30859			263.741	2.06303			277.538	0.3475
									307.044	-167.345			300.406	-18.1767			313.889	-15.4623													291.522	4.72346			264.26	2.58187			277.883	0.44571
									307.724	-169.764			301.096	-18.8076			314.525	-15.7499													292.108	4.2705			264.853	2.89803			278.482	0.24959
									308.073	-171.571			301.524	-19.5997			314.958	-15.989													292.461	3.93261			265.029	3.00089			278.839	-0.11988
									308.389	-172.794			301.967	-20.432			315.522	-16.2123													293.016	3.74058			265.745	2.86164			279.323	-0.62652
									309.139	-173.57			302.424	-21.1481			315.899	-16.4442													293.594	3.63564			266.067	2.45475			279.954	-1.23939
									309.428	-174.118			302.839	-21.5785			316.424	-16.6846													294	3.61436			266.745	1.79818			280.394	-1.93875
									310.091	-174.68			303.324	-21.6232			317.031	-16.8974													294.447	3.695			267.236	0.87005			280.794	-2.70446
									310.733	-175.425			303.87	-21.2696			317.19	-17.0443													295.141	3.95425			267.524	-0.24017			281.285	-3.4332
									310.899	-176.408			304.563	-20.6006			317.947	-17.1719													295.275	4.49331			268.027	-1.34778			281.772	-4.01977
									311.268	-177.588			304.758	-19.7778			318.461	-17.3246													295.881	5.33575			268.523	-2.31832			282.279	-4.35033
									312.024	-178.88			305.438	-18.9336			318.807	-17.5438													296.585	6.37067			268.958	-2.95657			282.582	-4.3569
									312.387	-180.132			305.874	-18.2599			319.35	-17.8941													296.905	7.3866			269.557	-3.16826			283.362	-4.07355
									312.921	-181.215			306.476	-17.8039			319.917	-18.3429													297.711	8.19242			269.864	-2.98725			283.697	-3.5263
									313.336	-181.993			306.923	-17.5988			320.31	-18.794													297.936	8.59657			270.447	-2.59207			284.254	-2.84966
									313.73	-182.301			307.322	-17.6078			320.669	-19.0969													298.451	8.58178			271.146	-2.15242			284.769	-2.15929
									314.29	-181.902			307.834	-17.749			321.206	-19.1507													299.004	8.2098			271.431	-1.85438			285.117	-1.57486
									314.798	-180.515			308.334	-17.9658			321.925	-18.8659													299.338	7.65266			272.055	-1.75093			285.805	-1.22936
									315.318	-177.88			308.798	-18.1888			322.163	-18.1655													299.965	7.06417			272.525	-1.77777			286.288	-1.16408
									315.892	-173.808			309.303	-18.4276			322.661	-17.1571													300.415	6.64612			272.774	-1.85009			286.774	-1.3732
									315.969	-168.412			309.921	-18.6563			323.345	-15.8529													300.818	6.48663			273.293	-1.88823			287.173	-1.7048
									316.974	-162.151			310.149	-18.9021			323.827	-14.3592													301.224	6.64588			274.044	-1.89695			287.485	-1.99594
									317.663	-155.732			310.776	-19.128			324.204	-12.7563													301.923	7.10643			274.474	-1.92405			288.184	-2.17147
									318.336	-150.034			311.269	-19.3004			324.79	-11.1698													302.321	7.70492			274.936	-1.99488			288.58	-2.16268
									318.963	-145.714			311.733	-19.3871			325.385	-9.72429													302.978	8.25749			275.36	-2.01678			289.204	-2.05237
									319.097	-143.072			312.232	-19.3939			325.735	-8.56938													303.26	8.61062			275.809	-1.84818			289.71	-1.96419
									319.725	-141.978			312.575	-19.4101			326.272	-7.87428													303.947	8.68065			276.233	-1.29371			290.007	-1.98181
									320.064	-142.051			313.312	-19.525			327.09	-7.68797													304.333	8.47513			276.837	-0.31309			290.674	-2.16676
									320.61	-142.847			313.722	-19.8491			327.201	-7.92526													304.781	8.04694			277.368	0.99241			290.941	-2.49641
									321.127	-144.085			314.21	-20.4439			327.798	-8.39903													305.218	7.50958			277.909	2.35672			291.677	-2.93427
									321.567	-145.601			314.682	-21.2659			328.026	-8.85105													305.75	6.94852			278.39	3.45177			292.137	-3.42912
									322.098	-147.435			315.045	-22.179			328.75	-9.11589													306.335	6.45178			279.017	3.99357			292.376	-3.89247
									322.475	-149.576			315.56	-23.0721			329.169	-9.15449													306.852	6.08596			279.299	3.89097			292.956	-4.25541
									323.012	-151.997			316.041	-23.7976			329.7	-9.10648													306.93	5.9014			280.018	3.16525			293.584	-4.42532
									323.383	-154.634			316.616	-24.3132			330.338	-9.13238													307.68	5.91738			280.252	2.06265			293.946	-4.38019
									323.902	-157.343			316.963	-24.599			330.665	-9.32702													308.307	6.108			280.68	0.85812			294.416	-4.09357
									324.262	-160.043			317.564	-24.7021			331.207	-9.74167													308.737	6.38312			281.243	-0.13941			294.932	-3.6612
									324.843	-162.612			318.029	-24.6614			331.519	-10.2932													309.176	6.72938			281.745	-0.71691			295.478	-3.20943
									325.187	-164.999			318.445	-24.4756			332.059	-10.8074													309.652	7.161			282.125	-0.73953			296.04	-2.82412
									325.703	-167.121			319.025	-24.1554			332.746	-11.2278													310.073	7.72653			282.729	-0.17708			296.433	-2.59238
									326.243	-168.912			319.522	-23.681			333.018	-11.4783													310.65	8.43462			283.171	0.87855			296.963	-2.46365
									326.572	-170.367			319.9	-23.0942			333.564	-11.5837													311.25	9.24851			283.779	2.2935			297.441	-2.33254
									327.1	-171.521			320.505	-22.5026			333.992	-11.5147													311.539	10.0083			284.068	3.8415			297.815	-2.13731
									327.53	-172.486			320.911	-21.9944			334.556	-11.303													312.262	10.578			284.883	5.21071			298.257	-1.7922
									328.14	-173.413			321.647	-21.7012			335.199	-10.9821													312.746	10.8119			285.28	6.17711			299.094	-1.32911
									328.695	-174.44			321.97	-21.5961			335.429	-10.5692													313.159	10.7244			285.826	6.47595			299.385	-0.7879
									329.105	-175.59			322.495	-21.6095			335.912	-10.1478													313.571	10.4151			286.248	6.05934			299.885	-0.24241
									329.372	-176.854			322.846	-21.5371			336.593	-9.8252													314.058	10.006			286.712	5.03425			300.361	0.29221
									329.89	-178.113			323.251	-21.1684			337.115	-9.7234													314.552	9.59888			287.254	3.65452			300.837	0.83393
									330.545	-179.254			323.979	-20.4664			337.57	-9.90375													315.017	9.21969			287.47	2.30826			301.359	1.36038
									330.994	-180.13			324.454	-19.4961			337.923	-10.3139													315.744	8.83919			288.13	1.34793			301.946	1.83419
									331.37	-180.662			324.831	-18.5099			338.488	-10.8378													315.988	8.41302			288.485	1.00612			302.276	2.17032
									331.87	-180.768			325.585	-17.81			338.936	-11.2345													316.447	7.97247			288.908	1.35343			302.987	2.28178
									332.273	-180.38			325.89	-17.638			339.327	-11.3294													316.994	7.47179			289.708	2.15415			303.232	2.1494
									332.842	-179.515			326.585	-18.1191			339.866	-11.0385													317.506	6.96833			289.994	3.12097			303.95	1.7539
									333.558	-178.213			326.868	-19.1175			340.461	-10.3875													317.982	6.44546			290.739	3.86826			304.28	1.27311
									333.903	-176.555			327.22	-20.4536			340.869	-9.5799													318.436	5.94742			291.23	4.17963			304.712	0.84529
									334.268	-174.676			327.89	-21.8645			341.45	-8.86127													318.975	5.54001			291.443	4.02589			305.303	0.62974
									334.822	-172.723			328.135	-23.1352			342.043	-8.39742													319.388	5.36454			292.142	3.56181			305.601	0.71248
									335.684	-170.76			328.794	-24.2003			342.452	-8.26177													319.858	5.5091			292.432	3.0859			306.275	1.08714
									335.962	-168.758			329.216	-25.0532			342.779	-8.43951													320.216	6.02826			292.865	2.7781			306.77	1.60038
									336.432	-166.543			329.81	-25.7611			343.408	-8.80797													321	6.87265			293.545	2.75752			307.196	2.06085
									336.904	-163.95			330.19	-26.4047			343.848	-9.20946													321.349	7.81326			293.921	2.89934			307.946	2.29173
									337.289	-160.865			330.536	-26.9871			344.279	-9.54469													322.069	8.63808			294.588	3.01823			308.099	2.26776
									337.917	-157.443			331.295	-27.5001			344.853	-9.77355													322.348	9.17435			294.975	2.94897			308.744	1.96202
									338.704	-154.085			331.649	-27.847			345.334	-9.89011													322.916	9.331			295.505	2.55239			309.191	1.47672
									339.246	-151.291			332.002	-28.0035			345.707	-9.91866													323.344	9.17207			295.973	1.88902			309.595	0.83504
									339.682	-149.544			332.652	-27.9443			346.297	-9.90944													323.975	8.81349			296.29	1.12884			310.058	0.01836
									340.187	-149.045			333.085	-27.6753			346.92	-9.84121													324.163	8.40214			296.897	0.39206			310.818	-0.96125
									340.469	-149.649			333.59	-27.2908			347.159	-9.65622													324.817	8.01224			297.284	-0.20085			311.212	-2.08074
									341.109	-150.999			334.134	-26.8487			347.697	-9.29338													325.395	7.70155			297.934	-0.62661			311.442	-3.20411
									341.416	-152.7			334.665	-26.3906			348.273	-8.72491													325.705	7.47852			298.21	-0.9392			311.894	-4.12135
									341.923	-154.343			335.012	-25.9363			348.7	-7.95494													326.319	7.39286			298.912	-1.19305			312.562	-4.64439
									342.409	-155.609			335.514	-25.4624			349.196	-7.1222													326.837	7.41559			299.395	-1.44552			312.941	-4.64069
									342.904	-156.26			336.156	-24.9848			349.826	-6.41282													327.067	7.54315			299.698	-1.64342			313.532	-4.15079
									343.45	-156.143			336.506	-24.4422			350.34	-6.02098													327.7	7.66684			300.139	-1.73299			313.998	-3.29503
									343.704	-155.219			337.129	-23.821			350.705	-6.03925													328.313	7.64398			300.874	-1.6227			314.415	-2.28273
									344.171	-153.618			337.563	-23.1269			351.262	-6.42086													328.921	7.33059			301.299	-1.30253			315.031	-1.36667
									345.118	-151.635			337.981	-22.3611			351.732	-7.00003													329.198	6.73349			301.57	-0.83913			315.652	-0.78487
									345.577	-149.568			338.442	-21.6349			352.086	-7.53528													329.577	5.92094			302.22	-0.34934			316.008	-0.65548
									345.951	-147.737			339.186	-21.0982			352.527	-7.85921													330.104	5.13264			302.879	0.01485			316.484	-0.95593
									346.437	-146.246			339.585	-20.9219			353.15	-7.92932													330.657	4.57133			303.338	0.19356			317.022	-1.55143
									346.854	-145.105			340.161	-21.196			353.624	-7.77931													331.055	4.35513			303.693	0.23698			317.362	-2.18636
									347.447	-144.238			340.45	-21.9354			354.258	-7.59857													331.542	4.51017			304.149	0.32216			317.876	-2.56635
									348.012	-143.607			340.957	-22.993			354.593	-7.53862													332.166	4.94674			304.547	0.65576			318.308	-2.4854
									348.446	-143.241			341.448	-24.0866			355.014	-7.70691													332.623	5.51382			305.194	1.26182			318.864	-1.87451
									348.91	-143.13			341.903	-24.994			355.655	-8.21286													333.048	6.05185			305.628	2.02855			319.417	-0.86401
									349.345	-143.281			342.422	-25.4868			356.095	-9.09858													333.625	6.43993			306.268	2.73677			319.927	0.32737
									350.074	-143.552			342.759	-25.5095			356.534	-10.337													334.048	6.61889			306.789	3.07393			320.365	1.43259
									350.354	-143.686			343.312	-25.1665			357.107	-11.826													334.716	6.58099			307.283	2.82398			321.033	2.2754
									350.702	-143.433			343.897	-24.6991			357.371	-13.3741													335.01	6.40783			307.571	1.98305			321.493	2.74316
									351.211	-142.646			344.586	-24.3577			358.022	-14.7699													335.492	6.27502			308.14	0.69918			321.876	2.8746
									351.851	-141.338			344.919	-24.3434			358.206	-15.7672													336.002	6.32023			308.524	-0.76893			322.224	2.7725
									352.477	-139.752			345.286	-24.6659			358.808	-16.2514													336.382	6.6083			309.174	-2.17958			322.881	2.54555
									352.873	-138.2			345.899	-25.2351			359.531	-16.2169													337.08	7.11447			309.351	-3.35783			323.479	2.23458
									353.483	-137.04			346.179	-25.7974			359.811	-15.7706													337.518	7.67331			309.882	-4.24972			323.746	1.8299
									353.814	-136.5			346.791	-26.189			360.354	-15.1054													338.053	8.16936			310.634	-4.881			324.342	1.3007
									354.479	-136.656			347.275	-26.3105			360.888	-14.3443													338.542	8.47861			311.003	-5.30978			324.756	0.62147
									354.865	-137.482			347.748	-26.2172			361.38	-13.6107													338.993	8.64085			311.442	-5.49588			325.366	-0.16826
									355.305	-138.775			348.26	-26.0749			361.971	-12.9426													339.389	8.79129			311.952	-5.37697			325.736	-0.97774
									355.753	-140.34			348.756	-26.0942			362.252	-12.3608													340.029	9.12939			312.274	-4.85226			326.223	-1.63478
									356.265	-141.938			349.322	-26.4074			362.847	-11.8591													340.347	9.72102			312.842	-3.97131			326.579	-1.94691
									356.63	-143.405			349.858	-26.9994			363.385	-11.4158													340.828	10.533			313.433	-2.93193			327.225	-1.80368
									357.27	-144.643			350.048	-27.754			363.825	-11.0899													341.629	11.4034			314.025	-2.09408			327.606	-1.22446
									357.55	-145.63			350.741	-28.4444			364.454	-10.8193													341.858	12.0887			314.649	-1.71648			328.152	-0.35689
									358.133	-146.478			350.975	-28.8193			364.748	-10.5131													342.701	12.4123			314.989	-1.96086			328.751	0.47825
									358.751	-147.278			351.617	-28.7685			365.316	-10.0731													342.952	12.2527			315.325	-2.64776			329.248	0.93637
									359.099	-148.218			352.111	-28.3066			365.698	-9.42717													343.276	11.6933			315.867	-3.4486			329.8	0.79326
									359.595	-149.364			352.733	-27.615			366.369	-8.60036													343.864	10.8892			316.149	-4.02742			330.25	-0.07159
									359.959	-150.835			353.086	-26.9203			366.675	-7.71263													344.516	10.0532			316.762	-4.22229			330.572	-1.51125
									360.647	-152.655			353.646	-26.3978			367.458	-6.92629													344.834	9.38821			317.398	-4.07532			331.094	-3.24301
									361.049	-154.826			354.234	-26.145			367.995	-6.43229													345.213	9.05653			317.939	-3.74738			331.476	-4.92155
									361.413	-157.251			354.611	-26.1057			368.13	-6.36438													345.687	9.0673			318.301	-3.39306			331.977	-6.26211
									361.927	-159.818			355.054	-26.1061			368.791	-6.7445													346.341	9.36017			318.88	-3.03932			332.589	-7.06273
									362.262	-162.341			355.491	-26.0274			369.233	-7.55405													346.975	9.8106			319.096	-2.66833			332.76	-7.34341
									362.899	-164.67			356.035	-25.766			369.876	-8.69095													347.212	10.1745			319.839	-2.20568			333.408	-7.25807
									363.157	-166.723			356.619	-25.382			370.297	-10.0074													347.863	10.3869			320.198	-1.66585			334.215	-7.00029
									363.866	-168.473			357.039	-24.9915			370.553	-11.2473													348.29	10.3892			320.881	-1.13597			334.494	-6.73682
									364.142	-169.927			357.569	-24.7686			370.998	-12.1941													348.726	10.2682			321.396	-0.70569			334.93	-6.46132
									364.726	-171.156			358.194	-24.7788			371.572	-12.6451													349.302	10.1759			321.686	-0.43632			335.443	-6.04531
									365.162	-172.236			358.511	-25.0313			372.207	-12.6765													349.761	10.2637			322.242	-0.32399			335.813	-5.34659
									365.721	-173.193			358.909	-25.3288			372.504	-12.4118													350.018	10.6076			322.666	-0.3135			336.292	-4.31388
									366.102	-174.069			359.506	-25.4191			373.135	-12.1281													350.73	11.123			323.357	-0.36419			337.011	-3.08176
									366.513	-174.927			359.961	-25.1359			373.744	-12.0925													351.363	11.6303			323.673	-0.48073			337.568	-1.892
									367.216	-175.878			360.352	-24.4146			374.137	-12.359													351.685	11.8853			324.188	-0.63922			338.013	-1.03444
									367.59	-177.082			360.921	-23.3896			374.515	-12.9117													352.346	11.7203			324.704	-0.90102			338.532	-0.71012
									367.913	-178.645			361.576	-22.2629			374.992	-13.5658													352.651	11.0035			325.211	-1.2394			338.868	-0.91146
									368.73	-180.661			362.09	-21.2687			375.382	-14.1815													353.206	9.82107			325.591	-1.67684			339.394	-1.49028
									369.041	-183.013			362.659	-20.5749			376.142	-14.6836													353.655	8.32489			326.184	-2.17825			339.905	-2.29436
									369.374	-185.508			362.761	-20.2036			376.373	-15.0901													353.978	6.76312			326.607	-2.72443			340.39	-3.18436
									369.746	-187.85			363.39	-20.121			377.127	-15.4295													354.624	5.33909			327.118	-3.30325			340.764	-4.08748
									370.255	-189.775			364.067	-20.3236			377.409	-15.6947													354.973	4.23834			327.567	-3.83077			341.24	-5.0335
									370.899	-191.181			364.474	-20.8003			377.805	-15.9081													355.504	3.51882			328.018	-4.2271			342.014	-6.03803
									371.283	-192.086			365.012	-21.5468			378.532	-16.0673													355.915	3.215			328.617	-4.37569			342.24	-7.0829
									371.747	-192.709			365.288	-22.507			378.82	-16.1307													356.572	3.32569			328.956	-4.21261			342.651	-8.0919
									372.292	-193.273			365.908	-23.5582			379.458	-16.1614													356.945	3.7766			329.451	-3.74404			343.236	-8.95091
									372.75	-194.037			366.321	-24.5365			379.877	-16.1881													357.495	4.5358			329.963	-3.12689			343.665	-9.51793
									373.303	-195.222			366.682	-25.2996			380.443	-16.2566													357.845	5.46877			330.638	-2.54776			344.122	-9.77669
									373.771	-196.863			367.352	-25.8327			380.781	-16.3879													358.601	6.46844			331.129	-2.20069			344.671	-9.69545
									374.129	-198.92			367.809	-26.1437			381.294	-16.5614													358.951	7.38492			331.524	-2.20355			345.231	-9.37597
									374.707	-201.184			368.184	-26.3639			381.941	-16.802													359.559	8.08143			332.017	-2.45918			345.586	-8.88246
									374.93	-203.304			368.86	-26.6047			382.391	-17.0104													360.012	8.46559			332.447	-2.77375			346.218	-8.26676
									375.622	-204.832			369.265	-26.884			382.618	-17.1964													360.429	8.46164			332.794	-2.93841			346.661	-7.55423
									375.926	-205.395			369.664	-27.2653			383.373	-17.3528													360.956	8.11229			333.408	-2.87612			347.101	-6.69928
									376.377	-204.722			370.175	-27.6733			383.68	-17.4796													361.437	7.4888			334.068	-2.63753			347.587	-5.69373
									376.889	-202.853			370.722	-28.0787			384.346	-17.6702													362.046	6.73698			334.335	-2.40916			348.257	-4.58935
									377.497	-200.007			371.277	-28.376			384.747	-17.9899													362.3	6.05168			334.97	-2.39537			348.491	-3.46818
									378.252	-196.602			371.509	-28.4941			385.34	-18.498													362.78	5.64792			335.681	-2.6456			349.345	-2.49467
									378.724	-193.051			372.096	-28.4345			385.684	-19.1267													363.217	5.6556			335.714	-3.07982			349.604	-1.83925
									379.122	-189.6			372.68	-28.2383			386.021	-19.7655													363.945	6.155			336.313	-3.46071			350.154	-1.62576
									379.566	-186.371			373.045	-28.0685			386.831	-20.2779													364.394	7.10001			336.783	-3.55036			350.754	-1.8781
									380.276	-183.374			373.839	-28.1213			387.082	-20.5201													364.704	8.36445			337.35	-3.23876			351.162	-2.54651
									380.538	-180.701			374.026	-28.5017			387.551	-20.4452													365.367	9.78364			337.789	-2.51868			351.488	-3.38715
									381.398	-178.423			374.69	-29.2552			388.096	-20.1192													365.979	11.1491			338.326	-1.5907			352.072	-4.16814
									381.714	-176.702			375.027	-30.256			388.691	-19.5972													366.319	12.3049			338.966	-0.6455			352.471	-4.70466
									382.375	-175.679			375.482	-31.3406			389.209	-19.0944													366.907	13.0972			339.292	0.11762			352.998	-4.87461
									382.799	-175.364			375.967	-32.3469			389.546	-18.7014													367.425	13.448			339.982	0.56177			353.472	-4.68917
									383.038	-175.649			376.429	-33.1679			390.106	-18.5523													367.874	13.3095			340.213	0.62016			354.03	-4.32702
									383.663	-176.409			377.031	-33.8266			390.684	-18.6487													368.253	12.6748			340.801	0.40745			354.589	-3.92342
									384.274	-177.564			377.436	-34.3647			391.088	-18.9595													368.888	11.5565			341.451	-0.08559			355.081	-3.63253
									384.7	-179.05			377.922	-34.8506			391.6	-19.4028													369.293	10.0331			341.663	-0.73378			355.33	-3.45047
									384.994	-180.811			378.478	-35.3345			391.965	-19.7463													369.817	8.28651			342.319	-1.48648			356.085	-3.33487
									385.577	-182.763			378.746	-35.8136			392.438	-19.8595													370.128	6.53408			342.59	-2.26096			356.522	-3.18382
									386.147	-184.866			379.466	-36.2752			393.172	-19.5955													370.666	5.04778			343.301	-3.05021			356.736	-2.99717
									386.368	-187.003			379.901	-36.6349			393.302	-18.9225													371.056	4.11333			343.682	-3.86129			357.462	-2.77919
									386.819	-189.198			380.304	-36.8237			394.05	-17.9483													371.464	3.85151			344.259	-4.67737			358.06	-2.63301
									387.582	-191.437			380.773	-36.7166			394.472	-16.8612													372.144	4.2319			344.42	-5.50723			358.542	-2.62844
									387.993	-193.727			381.262	-36.2797			395.154	-15.9299													372.69	5.06022			345.315	-6.2618			358.91	-2.71223
									388.248	-196.056			381.842	-35.5248			395.623	-15.3553													373.181	6.07258			345.526	-6.89152			359.237	-2.75823
									388.696	-198.336			382.265	-34.4961			395.931	-15.2384													373.484	7.01826			346.133	-7.24512			359.959	-2.54603
									389.326	-200.403			382.948	-33.3819			396.596	-15.5886													374.235	7.69			346.415	-7.17429			360.26	-1.94458
									389.721	-202.131			383.247	-32.3189			396.851	-16.3451													374.789	8.00876			347.065	-6.66806			360.923	-0.95163
									390.132	-203.469			383.881	-31.4062			397.469	-17.453													374.979	8.02882			347.543	-5.7579			361.279	0.30754
									390.739	-204.32			384.384	-30.7234			398.038	-18.7971													375.546	7.80982			348.024	-4.64427			361.99	1.61189
									391.097	-204.577			384.743	-30.1646			398.362	-20.2534													376.123	7.49178			348.606	-3.58493			362.504	2.67985
									391.645	-204.143			385.463	-29.6606			398.861	-21.7049													376.586	7.12872			349.153	-2.87117			362.845	3.32938
									392.14	-202.929			385.668	-29.1054			399.256	-22.9299													376.948	6.72699			349.718	-2.65133			363.49	3.47721
									392.619	-200.917			386.117	-28.51			399.731	-23.8286													377.472	6.2748			349.954	-3.00479			363.795	3.1243
									392.966	-198.295			386.993	-27.9845			400.232	-24.3344													378.252	5.76002			350.534	-3.71423			364.455	2.39694
									393.743	-195.482			387.274	-27.6871			400.821	-24.5484													378.409	5.2144			351.078	-4.57104			364.777	1.47528
									394.471	-192.937			387.895	-27.8091			401.303	-24.6657													378.846	4.65192			351.385	-5.27966			365.363	0.64887
									394.837	-191.075			388.362	-28.3127			401.631	-24.8462													379.494	4.12539			351.818	-5.6861			365.658	0.11487
									395.32	-190.143			388.583	-29.0934			402.446	-25.25													379.844	3.66392			352.464	-5.74296			366.166	0.02311
									395.708	-190.085			389.282	-29.9148			402.719	-25.86													380.524	3.17606			352.954	-5.55839			366.727	0.39697
									396.153	-190.681			389.528	-30.5561			403.089	-26.4838													380.93	2.6354			353.449	-5.35547			367.27	1.12802
									396.683	-191.7			390.209	-30.9259			403.703	-26.9761													381.388	2.04923			354.036	-5.29204			367.877	2.03406
									397.171	-192.927			390.653	-30.9536			404.016	-27.154													381.799	1.47543			354.343	-5.41439			368.213	2.88161
									397.679	-194.305			391.17	-30.7379			404.647	-27.0282													382.296	1.05995			354.975	-5.65654			368.736	3.56891
									397.986	-195.832			391.75	-30.4136			405.092	-26.687													382.865	0.92772			355.306	-5.8564			369.231	3.99926
									398.71	-197.466			391.924	-30.0596			405.694	-26.4016													383.279	1.16994			355.797	-5.82928			369.875	4.22885
									399.164	-199.031			392.694	-29.7981			406.302	-26.3587													383.685	1.77619			356.278	-5.46012			370.262	4.29017
									399.333	-200.163			393.239	-29.6678			406.594	-26.6708													384.382	2.65352			356.829	-4.78432			370.49	4.25822
									399.96	-200.515			393.681	-29.6628			406.929	-27.3218													384.787	3.70321			357.485	-3.94438			371.231	4.08186
									400.345	-199.859			394.074	-29.6998			407.78	-28.0563													385.4	4.76039			357.793	-3.077			371.74	3.6986
									400.763	-198.214			394.362	-29.6621			407.932	-28.6311													385.869	5.74537			358.33	-2.28005			372.306	3.04252
									401.612	-195.974			395.107	-29.4888			408.498	-28.7999													386.125	6.58579			358.993	-1.60337			372.615	2.08319
									402.183	-193.71			395.668	-29.1465			408.767	-28.4017													386.863	7.17322			359.236	-1.01438			373.174	0.9729
									402.619	-192.011			396.079	-28.6405			409.688	-27.4871													387.469	7.44008			359.781	-0.50344			373.457	-0.09361
									403.189	-191.254			396.511	-28.0058			409.94	-26.1445													387.726	7.34333			360.298	-0.09592			374.01	-0.92025
									403.456	-191.583			397.019	-27.2467			410.625	-24.6051													388.323	6.92472			360.893	0.14054			374.476	-1.42352
									404.055	-192.795			397.553	-26.4545			411.08	-23.056													388.76	6.30655			361.428	0.09395			375.134	-1.56835
									404.505	-194.559			397.922	-25.7202			411.429	-21.6277													389.26	5.64616			361.772	-0.23733			375.486	-1.42291
									404.782	-196.54			398.736	-25.2092			412.114	-20.4826													389.57	5.16564			362.209	-0.7548			376.036	-1.04954
									405.474	-198.402			399.098	-25.0319			412.56	-19.7154													390.108	4.9606			362.81	-1.28003			376.591	-0.4802
									405.787	-199.995			399.578	-25.213			413.134	-19.3286													390.86	5.10978			363.184	-1.67187			376.787	0.27627
[truncated: 3,193 more rows]

## Sheet: Fig.S1_E-F
Adhesion force (pN)							Adhesion frequency (%)
[truncated: 12 more rows]

## Sheet: Fig.S3
	AR0382 (OD490)	Δals4112_1 (OD490)	Δals4112_2 (OD490)	Δals4112_3 (OD490)	Δscf1_1 (OD490)	Δscf1_2 (OD490)	Δscf1_3 (OD490)
[truncated: 34 more rows]

[truncated: 2 more sheets: Fig.S2_A, Gel_images]
